# Supplementary material
Source: publisher figshare collection journal article supplement (https://gsapubs.figshare.com/ndownloader/files/28385742)
Supplement: Supplementary file 1 [file 28385742]

index	measuremeta_id	sample_name	ref	age_238u_206pb	err_238u_206pb	age_235u_207pb	err_235u_207pb	age_207pb_206pb	err_207pb_206pb	concordance	lith	lith_class	col_id	unit_id	section_id	strat_name	t_age	b_age	concordant	best_age	Cohort
0	33302	Mol9-7	http://www.scielo.org.mx/pdf/rmcg/v31n3/v31n3a8.pdf	967.3	37.8	986.1	35.6	1027.9	75.8	94.10448487206926	paragneiss	metamorphic	1419	33215	7745	Huiznopala Fm	1000.0	1200.0	True	967.3
1	28834	08-TH-05	10.1130/B30530.1	1857.0	54.0	1878.0	30.0	1900.0	19.0	97.73684210526316	sandstone	sedimentary	755	21969	6012	Glenelg	898.64	945.12	True	1900.0
2	28834	08-TH-05	10.1130/B30530.1	1857.0	54.0	1878.0	30.0	1900.0	19.0	97.73684210526316	sandstone	sedimentary	755	21968	6012	Reynolds Point	880.16	898.64	True	1900.0
3	28834	08-TH-05	10.1130/B30530.1	1857.0	54.0	1878.0	30.0	1900.0	19.0	97.73684210526316	sandstone	sedimentary	755	21967	6012	Minto	861.68	880.16	True	1900.0
4	28834	08-TH-05	10.1130/B30530.1	1857.0	54.0	1878.0	30.0	1900.0	19.0	97.73684210526316	sandstone	sedimentary	755	21966	6012	Wynniatt	811.0	861.68	True	1900.0
5	28834	08-TH-05	10.1130/B30530.1	1857.0	54.0	1878.0	30.0	1900.0	19.0	97.73684210526316	sandstone	sedimentary	755	21965	6012	Kilian	780.2	811.0	True	1900.0
6	29324	12WI5	10.1130/B31142.1	1805.4	27.0	1822.9	21.4	1842.9	33.8	97.9651636008465	argillite	sedimentary	459	13634	3603	Wyman Fm	573.9	583.3	True	1805.4
7	29113	XOM-AOS-22	10.1130/G35513.1	2557.7	68.0	2558.8	36.0	2559.7	35.6	99.92186584365355	sandstone	sedimentary	1625	37218	9542	McMurray Fm	111.75	125.0	True	2559.7	Mesozoic
8	34752	94CL53	10.1029/2005TC001830	569.0	34.0	545.0	87.0				sandstone	sedimentary	155	5367	1272	Otuk Fm	168.8	247.2	True	569.0	Mesozoic
9	28742	09ANJ13	10.1130/L131.1	199.1	9.0	191.5	22.2				sandstone	sedimentary	413	11096	2971	Valdez Gp	67.525	83.6	True	199.1
10	28515	UT8A	10.1130/G30684.1	1077.2	30.8	1095.1	30.6	1130.8	66.8	95.25999292536258	conglomerate	sedimentary	502	15469	4106	Cedar Mountain Fm	122.0	125.0	True	1077.2	Mesozoic
11	34002	C1	10.1130/L451.1	201.8	4.0	208.0	58.0	280.0	698.0	72.07142857142857	conglomerate	sedimentary	1454	33654	8226	Tantalus	126.1	150.325	True	201.8
12	29936	CG11-2	10.1130/GES00917.1	1409.0	21.0	1421.0	14.0	1439.5	30.6	97.88120875303925	sandstone	sedimentary	525	16764	4317	Catahoula Fm	20.44	26.41	True	1409.0	Cenozoic
13	28974	GC-Monteith_A	10.1130/B30671.1	1083.2	27.6	1080.0	20.6	1073.6	27.4	100.89418777943368	sandstone	sedimentary	1626	37260	9550	Monteith Fm	139.8	146.775	True	1073.6	Mesozoic
14	42905	FCB-A2	http://ir.uiowa.edu/etd/3119	1196.0	39.4	1209.0	31.0	1234.0	48.8	96.92058346839546	sandstone	sedimentary	90	3423	691	Cherokee Gp	311.0	319.0	True	1196.0	Paleozoic*
15	35703	11RMSS5	10.1016/j.precamres.2014.06.005	1253.6	45.2	1287.8	134.0	1345.3	346.2	93.18367650338215	greywacke	sedimentary	464	13874	3691	Beck Spring Dolomite	677.5	686.0	True	1253.6
16	35341	08LT02	10.1080/00206814.2013.844313	126.2	6.0	126.6	19.2				sandstone	sedimentary	1421	33271	7753	Las Trancas Fm	150.325	156.0	True	126.2
17	28862	CLA708	http://specialpapers.gsapubs.org/content/487/63.abstract	82.2	0.5	88.5	8.0	263.1	217.3	31.242873432155076	sandstone	sedimentary	332	9034	2282	Renova Fm	23.03	38.675	True	82.2
18	28733	6152	10.1130/B30260.1	179.6	3.2			206.4	63.6	87.01550387596899	sandstone	sedimentary	290	7501	1979	Hyde Fm	176.25	180.55	True	179.6
19	28743	09ANJ34	10.1130/L131.1	1871.6	45.2	1862.3	42.6	1852.0	75.2	101.05831533477323	sandstone	sedimentary	413	11096	2971	Valdez Gp	67.525	83.6	True	1871.6	Mesozoic
20	43200	CP42	10.2110/jsr.2008.088	1121.5	20.6	1124.3	23.6	1129.6	56.7	99.28293201133144	sandstone	sedimentary	483	14779	3927	Chinle Fm	206.7	237.0	True	1121.5	Mesozoic
21	28676	05SP14-20	10.1130/B30029.1	1107.6	23.8	1114.8	19.3	1128.8	32.5	98.1218993621545	conglomerate	sedimentary	465	13948	3704	Sheep Pass Fm	34.875	46.175	True	1107.6	Cenozoic
22	40701	11HW-32	10.2475/06.2015.02	60.7	2.8	60.8	3.2	65.7	67.6	92.3896499238965	sandstone	sedimentary	413	11097	2972	Orca Gp	53.95	64.9	True	60.7
23	35267	46EAB09	10.1130/B30860.1	2589.4	52.2	2602.5	23.4	2612.7	8.6	99.1082022428905	greywacke	sedimentary	477	14498	3843	Perry Canyon Fm	663.3331	668.0557	True	2612.7
24	29323	12WI4	10.1130/B31142.1	1344.8	31.0	1363.2	33.6	1392.0	70.2	96.60919540229885	argillite	sedimentary	459	13634	3603	Wyman Fm	573.9	583.3	True	1344.8
25	28728	6004	10.1130/B30260.1	404.8	10.6			418.8	62.4	96.65711556829035	sandstone	sedimentary	290	7516	1980	Vester Fm	227.0	237.0	True	404.8
26	35112	JL19A	10.1144/0016-76492008-088	630.7	24.6	620.8	35.4	634.2	37.0	99.44812362030905	conglomerate	sedimentary	589	18453	4758	Crown Hill	562.939	583.333	True	630.7
27	43185	SR	10.2110/jsr.2008.088	527.0	7.1	502.5	32.2	392.2	179.6	134.37021927587966	sandstone	sedimentary	71	2537	461	Santa Rosa Sandstone	227.0	237.0	True	527.0
28	43201	CP44	10.2110/jsr.2008.088	1629.2	59.9	1633.3	37.6	1638.6	37.5	99.4263395581594	sandstone	sedimentary	502	15475	4108	Chinle Fm	228.6667	230.3333	True	1638.6	Mesozoic
29	43651	C-054337	10.1144/jgs2014-027	1131.0	28.0	1133.0	28.0	1125.0	35.0	100.53333333333333	sandstone	sedimentary	1562	35765	9021	Danish River Fm	427.4	438.5	True	1131.0	Paleozoic*
30	30318	GVG09-8	10.1130/B31065.1	2057.0	298.8	2373.9	156.4	2658.4	21.0	77.37736984652423	sandstone	sedimentary	256	6918	1756	Ione Fm	46.175	47.8	True	2658.4	Cenozoic
31	35252	13EAB10	10.1130/B30860.1	2367.5	135.8	2451.8	65.4	2522.4	28.2	93.85902315255312	diamictite	sedimentary	477	14498	3843	Perry Canyon Fm	663.3331	668.0557	True	2522.4
32	30881	TMS009	http://digitalscholarship.unlv.edu/thesesdissertations/1522/	1235.6	30.4	1232.4	40.0	1226.8	96.4	100.71731333550701	sandstone	sedimentary	468	14065	3728	Muddy Creek Fm	5.333	11.62	True	1235.6	Cenozoic
33	34495	6953	10.1130/B25989.1	2695.0	70.0			2679.0	12.0	100.59723777528929	sandstone	sedimentary	757	22001	6028	Dunvegan	1326.25	1351.0	True	2679.0
34	28876	08FM10-LA	10.1130/B30657.1	507.0	26.0	509.0	26.0	516.0	86.0	98.25581395348837	sandstone	sedimentary	52	1873	281	Bliss Fm	483.475	493.575	True	507.0
35	28652	3DB69	10.1130/B30235.1	413.3	4.6	419.7	25.0	455.4	160.0	90.75537988581466	sandstone	sedimentary	510	15822	4187	Indian Meadows Fm	53.95	56.0	True	413.3
36	34278	LM4-1258	http://gsabulletin.gsapubs.org/content/113/9/1234.short	1195.0	48.0			1199.0	252.0	99.66638865721434	sandstone	sedimentary	1607	36523	9343	Bradore Fm	533.5	564.5	True	1195.0	Cambrian
37	34411	Rome2	10.1130/G20727.1	1111.0	56.0	1183.0	140.0	1317.0	42.0	84.35839028094153	sandstone	sedimentary	8	136	46	Rome Fm	511.0	514.75	True	1317.0	Cambrian
38	28832	07-LG-14	10.1130/B30530.1	1375.0	47.0	1428.0	49.0	1509.0	19.0	91.11994698475812	sandstone	sedimentary	1653	38100	9839	Saline River Fm	501.0	503.5	True	1509.0	Cambrian
39	29130	XOM-MDB-17	10.1130/G35513.1	1065.8	82.6	1090.0	60.8	1138.7	68.4	93.59796258891718	sandstone	sedimentary	531	17122	4364	Wilcox Gp	53.2667	58.4	True	1138.7	Cenozoic
40	29050	DB0110	10.1130/B30824.1	89.1	4.4	81.2	18.0				sandstone	sedimentary	515	15990	4229	Frontier Fm	95.022	100.5	True	89.1
41	28673	05DW1	10.1130/B30029.1	2810.7	34.4	2778.9	30.1	2755.9	45.9	101.98846111977937	conglomerate	sedimentary	463	13841	3677	Sheep Pass Fm In Fish Creek Range	37.8	46.175	True	2810.7	Cenozoic
42	42830	JL1	10.1139/E09-065	448.7	21.3	466.5	57.5	443.3	282.5	101.21813670200767	sandstone	sedimentary	1480	34196	8485	Jones Lake Fm	243.3	251.3	True	448.7
43	28835	08-TH-06	10.1130/B30530.1	2018.0	53.0	2152.0	30.0	2283.0	24.0	88.39246605343845	sandstone	sedimentary	755	21969	6012	Glenelg	898.64	945.12	False	2283.0
44	28835	08-TH-06	10.1130/B30530.1	2018.0	53.0	2152.0	30.0	2283.0	24.0	88.39246605343845	sandstone	sedimentary	755	21968	6012	Reynolds Point	880.16	898.64	False	2283.0
45	28835	08-TH-06	10.1130/B30530.1	2018.0	53.0	2152.0	30.0	2283.0	24.0	88.39246605343845	sandstone	sedimentary	755	21967	6012	Minto	861.68	880.16	False	2283.0
46	28835	08-TH-06	10.1130/B30530.1	2018.0	53.0	2152.0	30.0	2283.0	24.0	88.39246605343845	sandstone	sedimentary	755	21966	6012	Wynniatt	811.0	861.68	False	2283.0
47	28835	08-TH-06	10.1130/B30530.1	2018.0	53.0	2152.0	30.0	2283.0	24.0	88.39246605343845	sandstone	sedimentary	755	21965	6012	Kilian	780.2	811.0	False	2283.0
48	42905	FCB-A2	http://ir.uiowa.edu/etd/3119	469.0	17.4	465.0	21.0	447.0	91.2	104.92170022371366	sandstone	sedimentary	90	3423	691	Cherokee Gp	311.0	319.0	True	469.0
49	35722	NR9	10.1016/j.precamres.2012.02.017	1799.8	32.6			1782.0	40.0	100.99887766554433	sandstone	sedimentary	466	13993	3712	Stirling Quartzite	867.5065	1193.9935	True	1799.8
50	40690	11CD-60	10.2475/06.2015.02	63.8	20.4	70.1	57.0	291.1	1840.0	21.916867055994505	sandstone	sedimentary	414	11107	2980	Ghost Rocks Fm	62.7	66.0	True	63.8
51	28701	Kaibab	10.1130/L121.1	1163.0	12.0	1152.0	28.0	1133.0	80.0	102.64783759929391	sandstone	sedimentary	491	15033	4000	Kaibab Limestone	262.5625	269.4875	True	1163.0	Paleozoic*
52	29934	CG11-10	10.1130/GES00917.1	600.2	7.5	599.4	6.6	618.3	40.5	97.07261846999839	sandstone	sedimentary	518	16259	4268	Wilcox Fm	50.5333	58.4	True	600.2	Cenozoic
53	28509	UT0714	10.1130/G30684.1	1690.2	60.6	1719.0	39.2	1754.1	44.0	96.35710620831196	conglomerate	sedimentary	502	15469	4106	Cedar Mountain Fm	122.0	125.0	True	1754.1	Mesozoic
54	28648	2DB2	10.1130/B30235.1	439.6	12.0	428.7	17.6	370.0	94.0	118.8108108108108	sandstone	sedimentary	486	16049	4243	Wind River Fm	47.8	53.95	True	439.6
55	28512	UT3	10.1130/G30684.1	1383.3	28.6	1387.6	27.2	1394.3	53.0	99.2110736570322	conglomerate	sedimentary	482	14737	3914	Indianola Gp	83.6	145.0	True	1383.3	Mesozoic
56	34017	CO13-Ec-3Jw	10.1130/L467.1	1742.3	29.2	1756.6	44.6	1773.6	91.0	98.23522778529545	sandstone	sedimentary	494	15144	4022	Wanakah Fm	167.75	168.3	True	1742.3	Mesozoic
57	42905	FCB-A2	http://ir.uiowa.edu/etd/3119	1163.0	34.4	1173.0	28.2	1191.0	48.2	97.64903442485307	sandstone	sedimentary	90	3423	691	Cherokee Gp	311.0	319.0	True	1163.0	Paleozoic*
58	34016	CO13-EC-2Jw	10.1130/L467.1	527.1	11.5	546.3	33.4	626.9	163.4	84.08039559738395	sandstone	sedimentary	494	15144	4022	Wanakah Fm	167.75	168.3	True	527.1
59	28572	I4	10.1130/B30120.1	2443.7	26.8	2591.6	48.8	2679.9	31.3	91.1862382924736	sandstone	sedimentary	1657	38191	9877	Imperial Fm	362.225	382.7	False	2443.7
60	29177	XOM-MDB-67	10.1130/G35513.1	2038.4	49.6	2045.9	25.4	2053.5	9.0	99.2646700754809	sandstone	sedimentary	520	16415	4285	Wilcox Fm	49.85	53.2667	True	2053.5	Cenozoic
61	40704	TI10-01	10.2475/06.2015.02	72.7	20.4	156.3	494.8	1738.6	359.6	4.181525365236397	sandstone	sedimentary	413	11097	2972	Orca Gp	53.95	64.9	True	72.7
62	28972	Basal-Monteith	10.1130/B30671.1	1822.2	91.6	1827.6	52.6	1833.8	41.8	99.36743374413786	sandstone	sedimentary	1622	37079	9506	Monteith Fm	139.8	146.775	True	1833.8	Mesozoic
63	45604	K065715	https://doi.org/10.1130/B31532.1	1551.0	92.0	1585.0	66.0	1630.0	119.6	95.15337423312883	sandstone	sedimentary	491	36852	9433	Carbon Butte Member	736.8	742.4	True	1551.0
64	29120	XOM-MDB-05	10.1130/G35513.1	1117.7	52.8	1110.7	61.8	1097.2	151.6	101.86839227123588	sandstone	sedimentary	526	16848	4323	Lower Frio Mbr	26.8325	27.4663	True	1117.7	Cenozoic
65	29120	XOM-MDB-05	10.1130/G35513.1	1117.7	52.8	1110.7	61.8	1097.2	151.6	101.86839227123588	sandstone	sedimentary	526	16847	4323	Middle Frio Mbr	24.9313	26.8325	True	1117.7	Cenozoic
66	29120	XOM-MDB-05	10.1130/G35513.1	1117.7	52.8	1110.7	61.8	1097.2	151.6	101.86839227123588	sandstone	sedimentary	526	16846	4323	Upper Frio Mbr	24.2975	24.9313	True	1117.7	Cenozoic
67	34914	40-FC0502	10.1130/GES00982.1	418.2	6.8	409.5	34.6				sandstone	sedimentary	222	6547	1598	Imperial Fm	3.347	4.0333	True	418.2
68	28694	B_Angel_2	10.1130/L121.1	1741.0	32.0	1758.0	22.0	1778.0	26.0	97.91901012373454	shale	sedimentary	491	15028	3997	Bright Angel Shale	498.925	506.75	True	1778.0	Cambrian
69	34497	7809	10.1130/B25989.1	2536.0	48.0			2619.0	18.0	96.83085147002673	sandstone	sedimentary	757	22001	6028	Dunvegan	1326.25	1351.0	True	2619.0
70	29183	XOM-MDB-73	10.1130/G35513.1	1071.8	15.0	1064.0	16.6	1048.1	40.6	102.26123461501766	sandstone	sedimentary	521	16441	4287	Wilcox Gp	49.85	58.4	True	1071.8	Cenozoic
71	45378	K03-Bass	10.1016/j.precamres.2017.03.006	2682.0	47.2	2687.3	27.8	2691.2	33.2	99.65814506539833	sandstone	sedimentary	491	36863	3996	Hotauta Conglomerate	1250.0	1254.0	True	2691.2
72	45378	K03-Bass	10.1016/j.precamres.2017.03.006	2682.0	47.2	2687.3	27.8	2691.2	33.2	99.65814506539833	sandstone	sedimentary	491	36862	3996	Bass Limestone	1244.0	1250.0	True	2691.2
73	45378	K03-Bass	10.1016/j.precamres.2017.03.006	2682.0	47.2	2687.3	27.8	2691.2	33.2	99.65814506539833	sandstone	sedimentary	491	36861	3996	Hakatai Shale	1180.0	1244.0	True	2691.2
74	45378	K03-Bass	10.1016/j.precamres.2017.03.006	2682.0	47.2	2687.3	27.8	2691.2	33.2	99.65814506539833	sandstone	sedimentary	491	36860	3996	Shinumo Quartzite	1140.0	1180.0	True	2691.2
75	45378	K03-Bass	10.1016/j.precamres.2017.03.006	2682.0	47.2	2687.3	27.8	2691.2	33.2	99.65814506539833	sandstone	sedimentary	491	36859	3996	Dox Sandstone	1108.0	1140.0	True	2691.2
76	45378	K03-Bass	10.1016/j.precamres.2017.03.006	2682.0	47.2	2687.3	27.8	2691.2	33.2	99.65814506539833	sandstone	sedimentary	491	36858	3996	Cardenas lavas	1100.0	1108.0	True	2691.2
77	35696	Samp_02	10.1016/j.sedgeo.2005.07.014	2280.2	128.4	2468.6	456.2	2627.7	9.6	86.77550709746166	sandstone	sedimentary	301	7799	2027	Pottsville Gp	312.0	319.0	True	2627.7	Paleozoic*
78	28997	09AnJ11a	10.1130/B30818.1	2505.0	150.0	2464.0	68.0	2430.0	28.0	103.08641975308642	sandstone	sedimentary	413	11096	2971	Valdez Gp	67.525	83.6	True	2430.0	Mesozoic
79	43191	CP6	10.2110/jsr.2008.088	1237.7	80.0	1224.6	80.2	1202.0	90.0	102.97004991680532	sandstone	sedimentary	488	14921	3971	Santa Rosa Sandstone	229.5	237.0	True	1237.7	Mesozoic
80	29182	XOM-MDB-72	10.1130/G35513.1	1912.7	128.6	2160.8	69.8	2405.5	9.0	79.5136146331324	sandstone	sedimentary	521	16441	4287	Wilcox Gp	49.85	58.4	False	2405.5
81	34753	96DH102	10.1029/2005TC001830	1218.0	27.0	1225.0	44.0	1239.0	57.0	98.30508474576271	sandstone	sedimentary	98	5246	1234	Ivishak Fm	245.9	250.7265	True	1218.0	Mesozoic
82	29126	XOM-MDB-11	10.1130/G35513.1	1392.6	25.2	1408.2	21.2	1432.0	36.4	97.24860335195531	sandstone	sedimentary	524	16740	4314	Wilcox Gp	49.85	58.4	True	1392.6	Cenozoic
83	40671	LL2	10.1306/10191515029	1047.1	67.8	1049.3	57.4	1054.1	106.2	99.33592638269614	sandstone	sedimentary	1625	37218	9542	McMurray Fm	111.75	125.0	True	1047.1	Mesozoic
84	30876	TMS002	http://digitalscholarship.unlv.edu/thesesdissertations/1522/	1049.0	40.4	1041.3	27.4	1025.1	13.8	102.33147985562384	sandstone	sedimentary	468	14065	3728	Muddy Creek Fm	5.333	11.62	True	1025.1	Cenozoic
85	29013	09ANJ40	10.1130/B30818.1	2683.0	114.0	2695.0	50.0	2704.0	16.0	99.2233727810651	sandstone	sedimentary	413	11096	2971	Valdez Gp	67.525	83.6	True	2704.0	Mesozoic
86	28674	05KC01	10.1130/B30029.1	37.4	0.5	41.0	1.3	253.9	68.4	14.730208743599842	sandstone	sedimentary	465	13947	3704	Kinsey Canyon Fm	33.9	34.875	False	37.4
87	28688	3-26-04-23	10.1130/B30206.1	1208.5	32.0	1306.0	31.2	1469.8	59.2	82.22207103007212	sandstone	sedimentary	35	2899	528	McCoy Mountains Fm	116.0	168.8	False	1208.5
88	32528	JP00-03	10.1016/j.precamres.2013.09.012					2762.4	8.4		sandstone	sedimentary	776	22250	6173	Island Lake Gp unnamed 1	2710.0	2740.0	True	2762.4
89	32528	JP00-03	10.1016/j.precamres.2013.09.012					2762.4	8.4		sandstone	sedimentary	776	22249	6173	Island Lake Gp unnamed 2	2680.0	2710.0	True	2762.4
90	29041	BHB001	10.1130/B30824.1	100.2	4.6	99.0	23.6	71.1	584.4	140.9282700421941	sandstone	sedimentary	515	15990	4229	Frontier Fm	95.022	100.5	True	100.2
91	34918	44-FC06-2	10.1130/GES00982.1	1085.0	20.0	1102.7	19.0	1137.8	39.8	95.3594656354368	sandstone	sedimentary	825	22959	6465	Diablo Fm of Palm Spring Gp	2.588	4.0333	True	1085.0	Cenozoic
92	29196	51105	10.1130/B30999.1	613.5	14.4	642.6	51.4	746.0	222.0	82.23860589812332	sandstone	sedimentary	485	14880	3957	Frontier Fm	87.175	100.5	True	613.5	Mesozoic
93	43190	CP5	10.2110/jsr.2008.088	443.1	27.6	463.2	81.0	564.0	232.0	78.56382978723404	sandstone	sedimentary	71	2538	461	Trujillo Fm	227.0	237.0	True	443.1
94	28714	1GR100	10.1130/G31762.1	2794.0	82.5	2788.7	37.3	2784.6	24.1	100.33757092580622	conglomerate	sedimentary	487	16118	4252	Kootenai Fm	128.3	145.0	True	2784.6	Mesozoic
95	34083	11243	10.1130/L517.1	1105.4	59.0			1168.1	147.2	94.63230887766458	sandstone	sedimentary	1545	35561	8952	Bjorne Fm	247.2	251.6755	True	1105.4	Mesozoic
96	42906	FCB-AD	http://ir.uiowa.edu/etd/3119	1183.0	54.8	1161.0	40.4	1119.0	58.2	105.71939231456658	sandstone	sedimentary	90	3423	691	Cherokee Gp	311.0	319.0	True	1183.0	Paleozoic*
97	29115	XOM-AOS-25	10.1130/G35513.1	2718.0	183.4	2729.0	80.4	2737.2	31.6	99.29855326611136	sandstone	sedimentary	1625	37218	9542	McMurray Fm	111.75	125.0	True	2737.2	Mesozoic
98	43651	C-054337	10.1144/jgs2014-027	1162.0	26.0	1169.0	31.0	1153.0	27.0	100.7805724197745	sandstone	sedimentary	1562	35765	9021	Danish River Fm	427.4	438.5	True	1162.0	Paleozoic*
99	29943	CG11-9	10.1130/GES00917.1	37.1	0.8	37.5	2.7				sandstone	sedimentary	518	16242	4268	Fleming Fm	5.333	15.97	True	37.1
100	29111	XOM-AOS-18	10.1130/G35513.1	113.4	3.4	110.8	21.8	54.5	491.4	208.07339449541283	sandstone	sedimentary	1625	37219	9542	Clearwater Fm	110.5	111.75	True	113.4
101	43628	10687	10.1130/B30843.1	1244.0	34.0			1220.0	48.0	101.9672131147541	sandstone	sedimentary	1547	35591	8958	Danish River Fm	412.9	423.7333	True	1244.0	Paleozoic*
102	43628	10687	10.1130/B30843.1	1244.0	34.0			1220.0	48.0	101.9672131147541	sandstone	sedimentary	1547	35590	8958	Danish River Fm	423.7333	424.4667	True	1244.0	Paleozoic*
103	43628	10687	10.1130/B30843.1	1244.0	34.0			1220.0	48.0	101.9672131147541	sandstone	sedimentary	1547	35589	8958	Danish River Fm	424.4667	434.675	True	1244.0	Paleozoic*
104	28832	07-LG-14	10.1130/B30530.1	1248.0	41.0	1264.0	42.0	1255.0	23.0	99.44223107569721	sandstone	sedimentary	1653	38100	9839	Saline River Fm	501.0	503.5	True	1255.0	Cambrian
105	37456	CBBS	10.1130/GES01313.1	344.0	12.6	354.3	23.1	421.7	137.9	81.57457908465734	sandstone	sedimentary	520	16417	4285	Calvert Bluff Fm	54.6333	56.0	True	344.0
106	29187	XOM-MDB-77	10.1130/G35513.1	1084.9	32.2	1088.0	27.0	1094.3	49.4	99.1410033811569	sandstone	sedimentary	525	16766	4317	Frio Fm	22.3825	28.1	True	1084.9	Cenozoic
107	28731	6137	10.1130/B30260.1	192.3	8.6			1175.9	69.0	16.353431414235903	sandstone	sedimentary	290	7511	1980	Keller Creek Shale	192.925	201.3	True	192.3
108	42978	Z7004-SHR	10.1139/e05-079	1733.0	46.0			1780.0	42.0	97.35955056179775	arkose	sedimentary	798	22038	6049	Wakeham	925.0015	999.9985	True	1780.0
109	28835	08-TH-06	10.1130/B30530.1	1349.0	39.0	1645.0	47.0	2047.0	86.0	65.90131900341964	sandstone	sedimentary	755	21969	6012	Glenelg	898.64	945.12	False	1349.0
110	28835	08-TH-06	10.1130/B30530.1	1349.0	39.0	1645.0	47.0	2047.0	86.0	65.90131900341964	sandstone	sedimentary	755	21968	6012	Reynolds Point	880.16	898.64	False	1349.0
111	28835	08-TH-06	10.1130/B30530.1	1349.0	39.0	1645.0	47.0	2047.0	86.0	65.90131900341964	sandstone	sedimentary	755	21967	6012	Minto	861.68	880.16	False	1349.0
112	28835	08-TH-06	10.1130/B30530.1	1349.0	39.0	1645.0	47.0	2047.0	86.0	65.90131900341964	sandstone	sedimentary	755	21966	6012	Wynniatt	811.0	861.68	False	1349.0
113	28835	08-TH-06	10.1130/B30530.1	1349.0	39.0	1645.0	47.0	2047.0	86.0	65.90131900341964	sandstone	sedimentary	755	21965	6012	Kilian	780.2	811.0	False	1349.0
114	43191	CP6	10.2110/jsr.2008.088	1031.9	37.8	1030.5	90.6	1027.0	140.0	100.47711781888997	sandstone	sedimentary	488	14921	3971	Santa Rosa Sandstone	229.5	237.0	True	1031.9	Mesozoic
115	45598	CDGC6	https://doi.org/10.1130/B31532.1	1328.0	30.0	1323.0	30.0	1314.0	39.0	101.06544901065449	sandstone	sedimentary	491	36857	9434	Nankoweap Fm	767.6	770.4	True	1328.0
116	40037	PQ	10.1306/072600710305					1190.0	104.0		sandstone	sedimentary	314	8592	2142	Wappinger Gp	470.0	541.0	True	1190.0	Cambrian
117	42905	FCB-A2	http://ir.uiowa.edu/etd/3119	371.0	14.2	386.0	16.8	477.0	77.4	77.77777777777777	sandstone	sedimentary	90	3423	691	Cherokee Gp	311.0	319.0	True	371.0
118	29157	XOM-MDB-46	10.1130/G35513.1	1280.0	36.6	1284.7	38.2	1292.5	81.6	99.03288201160541	sandstone	sedimentary	165	5752	1344	Wilcox Gp	41.3	56.0	True	1280.0	Cenozoic
119	37461	K	10.1130/GES01313.1	159.0	26.1	170.0	30.9	326.2	111.6	48.743102391171064	sandstone	sedimentary	520	16418	4285	Simsboro Sand Mbr	56.0	56.8	True	159.0
120	42910	FCB-D4	http://ir.uiowa.edu/etd/3119	1321.0	35.2	1351.0	28.8	1398.0	48.0	94.49213161659513	sandstone	sedimentary	89	3399	688	Cherokee Gp	311.0	319.0	True	1321.0	Paleozoic*
121	29319	11IY1	10.1130/B31142.1	1349.6	94.4	1352.5	84.6	1357.1	158.8	99.44735096897797	quartzite	metamorphic	459	13631	3603	Campito Fm	536.05	541.0	True	1349.6	Cambrian
122	45382	JM16-77-1	10.1016/j.precamres.2017.03.006	1247.8	84.0	1247.2	55.0	1246.1	37.8	100.13642564802183	sandstone	sedimentary	491	36863	3996	Hotauta Conglomerate	1250.0	1254.0	True	1246.1
123	45382	JM16-77-1	10.1016/j.precamres.2017.03.006	1247.8	84.0	1247.2	55.0	1246.1	37.8	100.13642564802183	sandstone	sedimentary	491	36862	3996	Bass Limestone	1244.0	1250.0	True	1246.1
124	45382	JM16-77-1	10.1016/j.precamres.2017.03.006	1247.8	84.0	1247.2	55.0	1246.1	37.8	100.13642564802183	sandstone	sedimentary	491	36861	3996	Hakatai Shale	1180.0	1244.0	True	1246.1
125	45382	JM16-77-1	10.1016/j.precamres.2017.03.006	1247.8	84.0	1247.2	55.0	1246.1	37.8	100.13642564802183	sandstone	sedimentary	491	36860	3996	Shinumo Quartzite	1140.0	1180.0	True	1246.1
126	45382	JM16-77-1	10.1016/j.precamres.2017.03.006	1247.8	84.0	1247.2	55.0	1246.1	37.8	100.13642564802183	sandstone	sedimentary	491	36859	3996	Dox Sandstone	1108.0	1140.0	True	1246.1
127	45382	JM16-77-1	10.1016/j.precamres.2017.03.006	1247.8	84.0	1247.2	55.0	1246.1	37.8	100.13642564802183	sandstone	sedimentary	491	36858	3996	Cardenas lavas	1100.0	1108.0	True	1246.1
128	34018	EC-JMS	10.1130/L467.1	1266.6	21.9	1269.8	15.9	1275.2	21.4	99.32559598494353	sandstone	sedimentary	500	15412	4091	Morrison Fm	150.325	157.3	True	1275.2	Mesozoic
129	28835	08-TH-06	10.1130/B30530.1	866.0	36.0	1540.0	36.0	2648.0	19.0	32.70392749244713	sandstone	sedimentary	755	21969	6012	Glenelg	898.64	945.12	False	2648.0
130	28835	08-TH-06	10.1130/B30530.1	866.0	36.0	1540.0	36.0	2648.0	19.0	32.70392749244713	sandstone	sedimentary	755	21968	6012	Reynolds Point	880.16	898.64	False	2648.0
131	28835	08-TH-06	10.1130/B30530.1	866.0	36.0	1540.0	36.0	2648.0	19.0	32.70392749244713	sandstone	sedimentary	755	21967	6012	Minto	861.68	880.16	False	2648.0
132	28835	08-TH-06	10.1130/B30530.1	866.0	36.0	1540.0	36.0	2648.0	19.0	32.70392749244713	sandstone	sedimentary	755	21966	6012	Wynniatt	811.0	861.68	False	2648.0
133	28835	08-TH-06	10.1130/B30530.1	866.0	36.0	1540.0	36.0	2648.0	19.0	32.70392749244713	sandstone	sedimentary	755	21965	6012	Kilian	780.2	811.0	False	2648.0
134	34002	C1	10.1130/L451.1	177.8	4.0	194.0	42.0	395.0	526.0	45.0126582278481	conglomerate	sedimentary	1454	33654	8226	Tantalus	126.1	150.325	True	177.8
135	28735	7015	10.1130/B30260.1	159.9	5.2			349.4	70.0	45.76416714367487	sandstone	sedimentary	290	7498	1979	Lonesome Fm	163.5	164.15	True	159.9
136	42906	FCB-AD	http://ir.uiowa.edu/etd/3119	1375.0	60.6	1412.0	42.6	1467.0	51.8	93.72869802317655	sandstone	sedimentary	90	3423	691	Cherokee Gp	311.0	319.0	True	1467.0	Paleozoic*
137	42908	FCB-D2	http://ir.uiowa.edu/etd/3119	1186.0	35.2	1166.0	31.2	1130.0	61.6	104.95575221238938	sandstone	sedimentary	90	3423	691	Cherokee Gp	311.0	319.0	True	1186.0	Paleozoic*
138	28576	T2	10.1130/B30120.1	1828.4	20.1	1827.9	35.8	1813.6	47.4	100.81605646228496	sandstone	sedimentary	1657	38191	9877	Imperial Fm	362.225	382.7	True	1828.4	Paleozoic*
139	28692	06GC156	10.1130/L121.1	1034.0	42.0	1073.0	32.0	1153.0	40.0	89.67909800520381	sandstone	sedimentary	491	15037	4000	Supai Fm	282.0	313.75	True	1153.0	Paleozoic*
140	37272	9TD10	10.1130/L557.1	1798.0	27.0	1849.0	16.0	1906.0	15.0	94.33368310598111	quartzite	metamorphic	325	8781	2219	Kinnikinic Quartzite	456.5	470.0	False	1906.0
141	35253	18EAB10	10.1130/B30860.1	2284.8	135.6	2371.5	64.8	2446.9	4.4	93.3752911847644	diamictite	sedimentary	477	14498	3843	Perry Canyon Fm	663.3331	668.0557	True	2446.9
142	29066	MH0210	10.1130/B30824.1	1272.5	104.6	1412.8	69.8	1631.1	22.6	78.01483661332843	sandstone	sedimentary	515	15994	4229	Sundance Fm	158.354	168.8	False	1631.1
143	37468	OK-1	10.1130/GES01316.1	1353.9	15.9	1361.9	16.5	1374.5	34.2	98.501273190251	sandstone	sedimentary	158	5568	1306	Pontotoc Gp	282.0	300.1	True	1353.9	Paleozoic*
144	35318	JV-395	10.1130/G33746.1	102.2	3.4	106.7	16.4				sandstone	sedimentary	263	7086	1808	Tyee Fm	46.175	46.9875	True	102.2
145	40692	11SJO-34	10.2475/06.2015.02	92.5	17.8	54.2	53.0				sandstone	sedimentary	414	11105	2979	Sitkalidak Fm	32.595	42.925	True	92.5
146	29207	51211	10.1130/B30999.1	93.4	6.1	89.9	23.5				sandstone	sedimentary	504	15542	4128	Almond Fm	79.7667	81.6833	True	93.4
147	42909	FCB-D3	http://ir.uiowa.edu/etd/3119	1105.0	31.2	1110.0	24.8	1119.0	40.6	98.74888293118856	sandstone	sedimentary	80	2986	581	Cherokee Gp	310.5	317.25	True	1105.0	Paleozoic*
148	45593	L-Nankoweap	https://doi.org/10.1130/B31532.1	1411.0	32.0	1423.0	20.0	1441.0	41.6	97.91811242192921	sandstone	sedimentary	491	36857	9434	Nankoweap Fm	767.6	770.4	True	1411.0
149	29127	XOM-MDB-12	10.1130/G35513.1	998.4	23.6	1001.6	19.0	1008.6	31.4	98.98869720404521	sandstone	sedimentary	527	16912	4331	Nanafalia Fm	56.8	58.1333	True	998.4	Cenozoic
150	29127	XOM-MDB-12	10.1130/G35513.1	998.4	23.6	1001.6	19.0	1008.6	31.4	98.98869720404521	sandstone	sedimentary	527	16911	4331	Tuscahoma Fm	54.975	56.8	True	998.4	Cenozoic
151	29127	XOM-MDB-12	10.1130/G35513.1	998.4	23.6	1001.6	19.0	1008.6	31.4	98.98869720404521	sandstone	sedimentary	527	16910	4331	Bashi Fm	53.95	54.975	True	998.4	Cenozoic
152	29127	XOM-MDB-12	10.1130/G35513.1	998.4	23.6	1001.6	19.0	1008.6	31.4	98.98869720404521	sandstone	sedimentary	527	16909	4331	Hatchetigbee Fm	52.925	53.95	True	998.4	Cenozoic
153	45381	JM16-77-2	10.1016/j.precamres.2017.03.006	1244.5	37.2	1234.4	24.8	1216.9	21.0	102.26805818062289	sandstone	sedimentary	491	36863	3996	Hotauta Conglomerate	1250.0	1254.0	True	1216.9
154	45381	JM16-77-2	10.1016/j.precamres.2017.03.006	1244.5	37.2	1234.4	24.8	1216.9	21.0	102.26805818062289	sandstone	sedimentary	491	36862	3996	Bass Limestone	1244.0	1250.0	True	1216.9
155	45381	JM16-77-2	10.1016/j.precamres.2017.03.006	1244.5	37.2	1234.4	24.8	1216.9	21.0	102.26805818062289	sandstone	sedimentary	491	36861	3996	Hakatai Shale	1180.0	1244.0	True	1216.9
156	45381	JM16-77-2	10.1016/j.precamres.2017.03.006	1244.5	37.2	1234.4	24.8	1216.9	21.0	102.26805818062289	sandstone	sedimentary	491	36860	3996	Shinumo Quartzite	1140.0	1180.0	True	1216.9
157	45381	JM16-77-2	10.1016/j.precamres.2017.03.006	1244.5	37.2	1234.4	24.8	1216.9	21.0	102.26805818062289	sandstone	sedimentary	491	36859	3996	Dox Sandstone	1108.0	1140.0	True	1216.9
158	45381	JM16-77-2	10.1016/j.precamres.2017.03.006	1244.5	37.2	1234.4	24.8	1216.9	21.0	102.26805818062289	sandstone	sedimentary	491	36858	3996	Cardenas lavas	1100.0	1108.0	True	1216.9
159	40703	JG10-30	10.2475/06.2015.02	189.1	5.2	189.8	19.4	199.4	252.4	94.83450351053159	sandstone	sedimentary	413	11097	2972	Orca Gp	53.95	64.9	True	189.1
160	29172	XOM-MDB-62	10.1130/G35513.1	34.3	1.0	32.8	8.2				sandstone	sedimentary	518	16247	4268	Frio Fm	24.2975	28.1	True	34.3
161	29038	560110	10.1130/B30824.1	97.0	10.6	81.9	20.4				sandstone	sedimentary	515	15990	4229	Frontier Fm	95.022	100.5	True	97.0
162	42084	A	10.1016/S0037-0738(03)00158-1	618.0	25.0	650.0	40.0	760.0	78.0	81.3157894736842	sandstone	sedimentary	494	15139	4020	Cutler Fm	269.4875	298.9	True	618.0	Paleozoic*
163	28867	PIO509	http://specialpapers.gsapubs.org/content/487/63.abstract	34.6	1.8	27.5	6.8				sandstone	sedimentary	332	9034	2282	Renova Fm	23.03	38.675	False	34.6
164	29158	XOM-MDB-47	10.1130/G35513.1	1043.6	16.2	1038.6	20.8	1028.1	55.4	101.50763544402295	sandstone	sedimentary	165	5752	1344	Wilcox Gp	41.3	56.0	True	1043.6	Cenozoic
165	29202	51206	10.1130/B30999.1	1187.8	54.7	1224.6	43.4	1290.0	66.7	92.07751937984496	sandstone	sedimentary	507	15707	4162	Frontier Fm	95.55	109.875	True	1187.8	Mesozoic
166	43652	C-054480	10.1144/jgs2014-027	1410.0	19.0	1410.0	20.0	1420.0	25.0	99.29577464788733	sandstone	sedimentary	1566	35810	9042	Lands Lokk Fm	426.3	433.4	True	1410.0	Paleozoic*
167	45594	K1252NAN1	https://doi.org/10.1130/B31532.1	1047.0	38.0	1039.0	30.0	1021.0	49.4	102.54652301665034	sandstone	sedimentary	491	36857	9434	Nankoweap Fm	767.6	770.4	True	1047.0
168	38244	EI2-116	10.1111/ter.12207	1953.0	25.0	1969.0	27.0	1986.0	45.0	98.33836858006042	sandstone	sedimentary	1509	34836	8759	Nauyat	1266.0	1276.0	True	1953.0
169	40704	TI10-01	10.2475/06.2015.02	64.6	22.0	91.1	151.4	857.6	4673.2	7.532649253731344	sandstone	sedimentary	413	11097	2972	Orca Gp	53.95	64.9	True	64.6
170	37272	9TD10	10.1130/L557.1	2626.0	40.0	2640.0	18.0	2650.0	6.0	99.09433962264151	quartzite	metamorphic	325	8781	2219	Kinnikinic Quartzite	456.5	470.0	True	2650.0	Paleozoic*
171	29152	XOM-MDB-40	10.1130/G35513.1	1102.3	23.4	1109.1	19.8	1122.4	36.4	98.20919458303635	sandstone	sedimentary	434	11662	3146	Wilcox Fm	41.3	47.8	True	1102.3	Cenozoic
172	29201	51205	10.1130/B30999.1	97.7	5.2	93.2	29.6				sandstone	sedimentary	507	15705	4162	Adaville Fm	90.825	92.875	True	97.7
173	28510	UT0715	10.1130/G30684.1	2334.8	151.2	2397.5	79.8	2451.2	67.0	95.25130548302872	conglomerate	sedimentary	502	15469	4106	Cedar Mountain Fm	122.0	125.0	True	2451.2	Mesozoic
174	37470	OK-4	10.1130/GES01316.1	1057.8	21.6	1044.4	15.7	1016.4	18.7	104.07319952774498	sandstone	sedimentary	158	5567	1306	Wellington Fm	279.7375	282.0	True	1016.4	Paleozoic*
175	28508	UT0711	10.1130/G30684.1	2462.0	41.0	2520.4	46.6	2567.8	76.6	95.87974141288262	conglomerate	sedimentary	482	14737	3914	Indianola Gp	83.6	145.0	True	2462.0	Mesozoic
176	29116	XOM-MDB-01	10.1130/G35513.1	406.2	6.8	408.6	17.8	421.7	111.6	96.3244012331041	sandstone	sedimentary	526	16848	4323	Lower Frio Mbr	26.8325	27.4663	True	406.2
177	29116	XOM-MDB-01	10.1130/G35513.1	406.2	6.8	408.6	17.8	421.7	111.6	96.3244012331041	sandstone	sedimentary	526	16847	4323	Middle Frio Mbr	24.9313	26.8325	True	406.2
178	29116	XOM-MDB-01	10.1130/G35513.1	406.2	6.8	408.6	17.8	421.7	111.6	96.3244012331041	sandstone	sedimentary	526	16846	4323	Upper Frio Mbr	24.2975	24.9313	True	406.2
179	28575	T1	10.1130/B30120.1	2464.4	28.4	2510.5	46.9	2586.3	41.3	95.2867030120249	sandstone	sedimentary	1657	38191	9877	Imperial Fm	362.225	382.7	True	2464.4	Paleozoic*
180	37782	08-164	http://ir.uiowa.edu/etd/3496/	938.0	20.0	945.0	16.0	961.0	28.0	97.6066597294485	greywacke	sedimentary	1560	35737	9001	Danish River Fm	427.4	438.5	True	938.0	Paleozoic*
181	40367	SuQ2	10.1139/E06-010					2790.0	16.0		quartzite	metamorphic	192	6175	1477	Sunday Quartzite	2275.0	2365.0	True	2790.0
182	40367	SuQ2	10.1139/E06-010					2790.0	16.0		quartzite	metamorphic	192	6174	1477	Bad River Dolomite	2162.5	2275.0	True	2790.0
183	43203	CP48	10.2110/jsr.2008.088	1084.0	20.0	1087.8	19.4	1095.5	42.3	98.95025102692834	sandstone	sedimentary	490	15003	3990	Chinle Fm	201.3	232.0	True	1084.0	Mesozoic
184	40707	TI10-07	10.2475/06.2015.02	88.7	17.2	101.5	71.2	414.6	1635.2	21.394114809454898	sandstone	sedimentary	417	11133	2992	Orca Gp	56.8	62.7	True	88.7
185	29062	GE0110	10.1130/B30824.1	101.9	6.6	95.1	23.0				sandstone	sedimentary	515	16010	4229	Muddy Sandstone Mbr	125.0	126.1	True	101.9
186	42913	IB-D2	http://ir.uiowa.edu/etd/3119	1132.0	33.4	1137.0	31.0	1147.0	63.6	98.6922406277245	sandstone	sedimentary	432	13132	3464	Bernadotte Sandstone Mbr	312.9333	313.8813	True	1132.0	Paleozoic*
187	29937	CG11-3	10.1130/GES00917.1	87.4	2.1	101.8	5.1	444.4	116.4	19.666966696669668	sandstone	sedimentary	523	16621	4300	Wilcox Gp	49.85	58.4	False	87.4
188	30879	TMS005	http://digitalscholarship.unlv.edu/thesesdissertations/1522/	390.1	16.6	403.1	65.6	478.0	425.0	81.61087866108787	sandstone	sedimentary	468	14065	3728	Muddy Creek Fm	5.333	11.62	True	390.1
189	43189	CP4	10.2110/jsr.2008.088	506.2	42.0	477.9	71.6	344.0	194.0	147.15116279069767	sandstone	sedimentary	502	15475	4108	Chinle Fm	228.6667	230.3333	True	506.2
190	42831	JL2	10.1139/E09-065	1662.6	21.8	1706.3	43.2	1781.4	50.2	93.33108790838666	sandstone	sedimentary	1480	34196	8485	Jones Lake Fm	243.3	251.3	True	1662.6	Mesozoic
191	40668	LB2	10.1306/10191515029	1407.8	53.2	1420.6	35.8	1439.6	38.6	97.79105307029731	sandstone	sedimentary	1625	37218	9542	McMurray Fm	111.75	125.0	True	1439.6	Mesozoic
192	42906	FCB-AD	http://ir.uiowa.edu/etd/3119	1073.0	61.0	1041.0	45.2	972.0	65.6	110.39094650205762	sandstone	sedimentary	90	3423	691	Cherokee Gp	311.0	319.0	True	1073.0	Paleozoic*
193	35112	JL19A	10.1144/0016-76492008-088	624.2	20.2	618.8	32.8	604.7	36.8	103.2247395402679	conglomerate	sedimentary	589	18453	4758	Crown Hill	562.939	583.333	True	624.2
194	30877	TMS003	http://digitalscholarship.unlv.edu/thesesdissertations/1522/	1677.7	47.4	1676.3	30.2	1674.4	33.2	100.19708552317248	sandstone	sedimentary	468	14065	3728	Muddy Creek Fm	5.333	11.62	True	1674.4	Cenozoic
195	29027	10ANJ59	10.1130/B30818.1	135.0	12.0	130.0	38.0				sandstone	sedimentary	413	11096	2971	Valdez Gp	67.525	83.6	True	135.0
196	28884	11LHM03	10.1130/B30657.1	1071.0	20.0	1072.0	36.0	1073.0	104.0	99.81360671015844	sandstone	sedimentary	50	1828	254	Bliss Fm	483.475	493.575	True	1071.0	Cambrian
197	34083	11243	10.1130/L517.1	1063.2	43.4			1041.1	278.0	102.12275477859956	sandstone	sedimentary	1545	35561	8952	Bjorne Fm	247.2	251.6755	True	1063.2	Mesozoic
198	35339	CB55	http://scielo.unam.mx/pdf/rmcg/v23n3/v23n3a2.pdf	464.0	14.0	488.0	48.0	600.0	266.0	77.33333333333333	sandstone	sedimentary	1431	33135	7741	Santa Rosa	304.975	317.125	True	464.0
199	35339	CB55	http://scielo.unam.mx/pdf/rmcg/v23n3/v23n3a2.pdf	464.0	14.0	488.0	48.0	600.0	266.0	77.33333333333333	sandstone	sedimentary	1431	33134	7740	Santa Rosa	332.125	349.975	True	464.0
200	34279	LM5-1260	http://gsabulletin.gsapubs.org/content/113/9/1234.short	2676.0	110.0			2704.0	66.0	98.96449704142012	sandstone	sedimentary	1607	36525	9343	Hawke Bay Fm	511.0	518.5	True	2704.0	Cambrian
201	30339	Tourmaline	10.1130/B31065.1	121.2	4.4	125.1	6.6	199.5	99.2	60.75187969924812	sandstone	sedimentary	215	6479	1571	Scripps Fm	42.925	43.7375	True	121.2
202	28677	06MR19	10.1130/B30029.1	442.5	5.1	432.4	12.1	378.5	72.4	116.90885072655217	limestone	sedimentary	465	13948	3704	Sheep Pass Fm	34.875	46.175	True	442.5
203	28633	K061121	10.1130/G31335.1	2077.8	58.0	2088.8	30.2	2099.7	18.0	98.95699385626519	metasedimentary	metamorphic	491	15025	3995	Vishnu Schist	1690.0	1887.5	True	2099.7
204	29025	10ANJ54	10.1130/B30818.1	78.0	4.0	70.0	20.0				sandstone	sedimentary	413	11096	2971	Valdez Gp	67.525	83.6	True	78.0
205	43168	BENYON-316	10.2110/jsr.2014.16	1803.0	25.0	1826.1	16.4	1852.6	20.0	97.32268163661881	sandstone	sedimentary	1625	37218	9542	McMurray Fm	111.75	125.0	True	1852.6	Mesozoic
206	43191	CP6	10.2110/jsr.2008.088	552.6	22.4	569.3	48.2	636.0	112.0	86.88679245283019	sandstone	sedimentary	488	14921	3971	Santa Rosa Sandstone	229.5	237.0	True	552.6	Mesozoic
207	28696	Coconino1	10.1130/L121.1	1674.0	56.0	1656.0	32.0	1632.0	12.0	102.57352941176471	sandstone	sedimentary	491	15035	4000	Coconino Sandstone	275.2125	279.7375	True	1632.0	Paleozoic*
208	29064	HW1200108	10.1130/B30824.1	984.0	20.6	1001.0	30.4	1038.5	84.8	94.75204622051035	sandstone	sedimentary	515	15992	4229	Cloverly Fm	130.275	145.0	True	984.0	Mesozoic
209	37760	14-6c	https://uh-ir.tdl.org/uh-ir/handle/10657/964	1551.2	34.9	1545.7	19.6	1538.0	22.2	100.85825747724317	sandstone	sedimentary	1633	37499	9607	Dunvegan Fm	95.0	96.1	True	1538.0	Mesozoic
210	34159	Parry6	10.1139/e2012-067	967.8	25.4	939.2	26.2	1033.5	32.6	93.64296081277213	sandstone	sedimentary	1521	35047	8834	Consett Head Mbr	361.1167	363.3333	True	967.8	Paleozoic*
211	34159	Parry6	10.1139/e2012-067	967.8	25.4	939.2	26.2	1033.5	32.6	93.64296081277213	sandstone	sedimentary	1521	35046	8834	Cape Fortune Mbr	363.3333	368.875	True	967.8	Paleozoic*
212	34159	Parry6	10.1139/e2012-067	967.8	25.4	939.2	26.2	1033.5	32.6	93.64296081277213	sandstone	sedimentary	1521	35045	8834	Burnett Point Mbr	368.875	374.5625	True	967.8	Paleozoic*
213	29322	12WI3	10.1130/B31142.1	1797.7	26.2	1790.5	15.6	1782.1	14.6	100.87537175242691	quartzite	metamorphic	459	13632	3603	Deep Spring Fm	541.0	559.8	True	1782.1	Cambrian
214	29206	51210	10.1130/B30999.1	423.9	5.9	431.6	16.5	472.4	98.7	89.73327688399661	sandstone	sedimentary	504	15543	4128	Ericson Sandstone	81.6833	89.8	True	423.9
215	41553	61206-5	10.2475/05.2010.01	1463.8	50.6			1481.0	38.0	98.83862255232951	quartzite	metamorphic	379	10442	2707	Waits River Fm	391.9	407.6	True	1481.0	Paleozoic*
216	35721	NR30	10.1016/j.precamres.2012.02.017	1624.6	20.0			1687.0	26.0	96.30112625963248	sandstone	sedimentary	466	13993	3712	Stirling Quartzite	867.5065	1193.9935	True	1624.6
217	30845	08MC11	http://digitalscholarship.unlv.edu/thesesdissertations/145	419.7	10.2	430.6	100.0	489.2	628.8	85.79313164349959	sandstone	sedimentary	468	14065	3728	Muddy Creek Fm	5.333	11.62	True	419.7
218	45595	K1252NAN2	https://doi.org/10.1130/B31532.1	1101.0	46.0	1102.0	32.0	1104.0	59.8	99.72826086956522	sandstone	sedimentary	491	36857	9434	Nankoweap Fm	767.6	770.4	True	1101.0
219	45600	CDGC7	https://doi.org/10.1130/B31532.1	2569.0	72.0	2538.0	32.0	2514.0	22.4	102.18774860779634	sandstone	sedimentary	491	36854	9433	Carbon Canyon Member	748.0	753.6	True	2514.0
220	28720	GRF	10.1130/G31762.1	249.6	6.3	248.9	8.8	242.0	69.8	103.1404958677686	sandstone	sedimentary	334	9163	2316	Kootenai Fm	113.0	115.0	True	249.6
221	28634	K06246	10.1130/G31335.1	1585.6	50.8	1661.8	32.4	1759.4	29.8	90.12163237467318	metasedimentary	metamorphic	484	14829	3938	Vishnu Schist	1690.0	1887.5	False	1759.4
222	37261	09LR01	10.1130/L557.1	1886.0	46.0			1892.0	34.0	99.6828752642706	quartzite	metamorphic	325	8781	2219	Kinnikinic Quartzite	456.5	470.0	True	1892.0	Paleozoic*
223	37754	07TH33B	10.1139/E10-056	542.0	19.0	552.0	11.0	567.0	28.0	95.59082892416225	sandstone	sedimentary	1661	38282	9915	Imperial Fm	368.875	380.075	True	542.0
224	28650	2DB273	10.1130/B30235.1	2009.5	34.6	1988.1	56.2	1965.8	110.0	102.22301353138671	sandstone	sedimentary	510	15822	4187	Indian Meadows Fm	53.95	56.0	True	2009.5	Cenozoic
225	28865	MR2	http://specialpapers.gsapubs.org/content/487/63.abstract	1127.0	25.1	1112.9	16.7	1085.2	9.9	103.85182454847033	sandstone	sedimentary	332	9034	2282	Renova Fm	23.03	38.675	True	1085.2	Cenozoic
226	28866	PG208	http://specialpapers.gsapubs.org/content/487/63.abstract	105.0	1.2	106.1	6.4	126.5	146.6	83.00395256916995	sandstone	sedimentary	332	9034	2282	Renova Fm	23.03	38.675	True	105.0
227	29325	12WI6	10.1130/B31142.1	1505.3	43.8	1587.9	27.4	1699.4	18.8	88.57832176062139	dolomite	sedimentary	459	13633	3603	Reed Dolomite	559.8	573.9	False	1699.4
228	28881	09SL2	10.1130/B30657.1	1306.0	26.0	1323.0	20.0	1350.0	36.0	96.74074074074075	sandstone	sedimentary	52	1873	281	Bliss Fm	483.475	493.575	True	1306.0	Cambrian
229	34918	44-FC06-2	10.1130/GES00982.1	1400.3	81.8	1386.3	73.0	1364.8	137.6	102.60111371629543	sandstone	sedimentary	825	22959	6465	Diablo Fm of Palm Spring Gp	2.588	4.0333	True	1400.3	Cenozoic
230	28728	6004	10.1130/B30260.1	349.8	12.4			325.5	134.4	107.46543778801843	sandstone	sedimentary	290	7516	1980	Vester Fm	227.0	237.0	True	349.8
231	30877	TMS003	http://digitalscholarship.unlv.edu/thesesdissertations/1522/	940.3	43.8	976.4	32.0	1058.4	21.8	88.8416477702192	sandstone	sedimentary	468	14065	3728	Muddy Creek Fm	5.333	11.62	True	1058.4	Cenozoic
232	32041	FF-07-4-1	10.1016/j.precamres.2012.10.010	1579.0	60.0			1621.0	44.0	97.40900678593461	sandstone	sedimentary	1658	38196	9882	Quartet Gp	1630.0	1636.0	True	1621.0
233	29199	51108	10.1130/B30999.1	1500.1	54.0	1502.5	51.5	1505.9	97.9	99.61484826349691	sandstone	sedimentary	485	14877	3956	Morrison Fm	145.0	156.0	True	1500.1	Mesozoic
234	29064	HW1200108	10.1130/B30824.1	1689.7	55.0	1706.7	31.8	1727.6	19.2	97.80620514007872	sandstone	sedimentary	515	15992	4229	Cloverly Fm	130.275	145.0	True	1727.6	Mesozoic
235	29199	51108	10.1130/B30999.1	166.7	16.4	164.3	108.8	128.9	1718.0	129.32505818463926	sandstone	sedimentary	485	14877	3956	Morrison Fm	145.0	156.0	True	166.7
236	40705	TI10-03	10.2475/06.2015.02	76.3	24.4	80.5	59.8	206.1	1672.6	37.02086365841824	sandstone	sedimentary	413	11097	2972	Orca Gp	53.95	64.9	True	76.3
237	29937	CG11-3	10.1130/GES00917.1	409.5	7.0	415.5	7.0	455.5	42.1	89.90120746432491	sandstone	sedimentary	523	16621	4300	Wilcox Gp	49.85	58.4	True	409.5
238	28868	REN108	http://specialpapers.gsapubs.org/content/487/63.abstract	73.6	2.1	82.6	10.8	352.9	303.3	20.855766506092376	sandstone	sedimentary	332	9034	2282	Renova Fm	23.03	38.675	True	73.6
239	34012	CO13-Ec-1Jebb	10.1130/L467.1	539.8	8.0	526.0	41.1	466.7	219.5	115.6631669166488	sandstone	sedimentary	500	15414	4091	Entrada Fm	163.5	166.1	True	539.8
240	33950	12MP57	10.1130/L475.1	559.0	23.0	521.2	114.9	359.2	637.1	155.62360801781736	conglomerate	sedimentary	425	11187	3018	Descon Fm	407.6	470.0	True	559.0	Paleozoic*
241	29125	XOM-MDB-10	10.1130/G35513.1	439.3	17.6	438.7	22.6	435.4	106.2	100.89572806614606	sandstone	sedimentary	531	17122	4364	Wilcox Gp	53.2667	58.4	True	439.3
242	43177	12-PC12	10.2110/jsr.2014.33	499.8	15.2	496.7	37.2	482.5	197.6	103.58549222797927	sandstone	sedimentary	491	15052	4003	Wahweap Sandstone	84.275	87.175	True	499.8
243	43173	12-PC05	10.2110/jsr.2014.33	1172.9	24.0	1168.5	16.3	1160.3	14.2	101.08592605360683	sandstone	sedimentary	491	15053	4003	Straight Cliffs Sandstone	87.175	95.55	True	1160.3	Mesozoic
244	37469	OK-2	10.1130/GES01316.1	2696.8	22.8	2685.2	11.0	2676.5	8.9	100.75845320381094	sandstone	sedimentary	158	5568	1306	Pontotoc Gp	282.0	300.1	True	2676.5	Paleozoic*
245	29045	BR0110	10.1130/B30824.1	1577.5	29.4	1607.4	29.2	1646.8	54.6	95.79183871751275	sandstone	sedimentary	487	16121	4253	Chugwater Fm	201.3	247.2	True	1577.5	Mesozoic
246	42887	C-100614	10.1139/E10-006	1606.0	42.0	1637.0	28.0	1677.0	28.0	95.76624925462134	sandstone	sedimentary	1535	35351	8902	Isachsen Fm	113.0	126.1	True	1677.0	Mesozoic
247	37470	OK-4	10.1130/GES01316.1	1416.6	22.6	1423.5	13.9	1433.8	7.6	98.80039057051192	sandstone	sedimentary	158	5567	1306	Wellington Fm	279.7375	282.0	True	1433.8	Paleozoic*
248	37455	B1	10.1130/GES01313.1	2091.5	28.0	2044.3	41.7	2138.3	36.4	97.8113454613478	sandstone	sedimentary	519	16318	4277	Carrizo Fm	49.85	51.9	True	2091.5	Cenozoic
249	35297	GV40	http://gsabulletin.gsapubs.org/content/114/12/1564.short	152.9	8.4						sandstone	sedimentary	260	6975	1767	Fiske Creek	93.9	95.55	True	152.9
250	40671	LL2	10.1306/10191515029	1828.8	65.8	1864.2	55.0	1903.8	89.0	96.0605105578317	sandstone	sedimentary	1625	37218	9542	McMurray Fm	111.75	125.0	True	1828.8	Mesozoic
251	35265	38EAB09-LA	10.1130/B30860.1	1598.1	78.0	1644.1	45.0	1703.3	6.4	93.8237538895086	greywacke	sedimentary	477	14498	3843	Perry Canyon Fm	663.3331	668.0557	True	1703.3
252	42913	IB-D2	http://ir.uiowa.edu/etd/3119	1095.0	30.2	1111.0	28.0	1142.0	57.4	95.88441330998249	sandstone	sedimentary	432	13132	3464	Bernadotte Sandstone Mbr	312.9333	313.8813	True	1095.0	Paleozoic*
253	28573	Kino	10.1130/B30120.1	2933.7	87.3	2877.2	112.6	3066.9	69.2	95.65685219602857	sandstone	sedimentary	1657	38191	9877	Imperial Fm	362.225	382.7	True	3066.9	Paleozoic*
254	40692	11SJO-34	10.2475/06.2015.02	74.0	5.8	60.0	27.0				sandstone	sedimentary	414	11105	2979	Sitkalidak Fm	32.595	42.925	True	74.0
255	30844	08MC09	http://digitalscholarship.unlv.edu/thesesdissertations/145	1051.6	26.2	1072.2	45.8	1114.3	127.4	94.37314906219152	sandstone	sedimentary	468	14065	3728	Muddy Creek Fm	5.333	11.62	True	1051.6	Cenozoic
256	40665	LA3	10.1306/10191515029	1025.2	14.2	1028.4	15.0	1035.3	36.2	99.02443736115136	sandstone	sedimentary	1625	37218	9542	McMurray Fm	111.75	125.0	True	1025.2	Mesozoic
257	34082	11242	10.1130/L517.1	423.8	14.4			293.1	112.4	144.59228932105083	sandstone	sedimentary	1557	35708	8991	Heiberg Fm	188.775	213.125	True	423.8
258	28510	UT0715	10.1130/G30684.1	1837.2	37.0	1841.7	31.8	1846.8	53.2	99.48018193632228	conglomerate	sedimentary	502	15469	4106	Cedar Mountain Fm	122.0	125.0	True	1837.2	Mesozoic
259	28725	TFI	10.1130/G31762.1	225.0	5.6	209.1	29.7	33.8	373.1	665.6804733727811	conglomerate	sedimentary	487	16118	4252	Kootenai Fm	128.3	145.0	True	225.0
260	35297	GV40	http://gsabulletin.gsapubs.org/content/114/12/1564.short	156.0	15.5						sandstone	sedimentary	260	6975	1767	Fiske Creek	93.9	95.55	True	156.0
261	37469	OK-2	10.1130/GES01316.1	2684.7	27.4	2711.1	12.5	2730.8	7.3	98.31185000732386	sandstone	sedimentary	158	5568	1306	Pontotoc Gp	282.0	300.1	True	2730.8	Paleozoic*
262	29194	51103	10.1130/B30999.1	501.3	40.8	520.4	97.3	605.1	484.5	82.84581060981655	sandstone	sedimentary	512	15909	8850	Morrison Fm	145.0	158.3334	True	501.3
263	34012	CO13-Ec-1Jebb	10.1130/L467.1	269.2	8.1	262.2	12.3	199.7	100.5	134.80220330495743	sandstone	sedimentary	500	15414	4091	Entrada Fm	163.5	166.1	True	269.2
264	43621	10102	10.1130/B30843.1	1909.0	38.0			1933.0	38.0	98.75840662183136	sandstone	sedimentary	1549	35617	8964	Rawlings Bay Fm	521.0	522.3334	True	1909.0	Cambrian
265	30883	TMS011	http://digitalscholarship.unlv.edu/thesesdissertations/1522/	1096.0	36.2	1082.0	24.8	1054.0	19.0	103.98481973434535	sandstone	sedimentary	468	14065	3728	Muddy Creek Fm	5.333	11.62	True	1054.0	Cenozoic
266	37469	OK-2	10.1130/GES01316.1	2619.8	27.6	2640.5	13.3	2656.3	9.9	98.62590821819825	sandstone	sedimentary	158	5568	1306	Pontotoc Gp	282.0	300.1	True	2656.3	Paleozoic*
267	34751	94CL10	10.1029/2005TC001830	424.0	15.0	397.0	91.0				sandstone	sedimentary	155	5367	1272	Otuk Fm	168.8	247.2	True	424.0
268	43194	CP17	10.2110/jsr.2008.088	441.8	10.0	461.4	200.8	560.0	1196.0	78.89285714285714	sandstone	sedimentary	495	15195	4029	Chinle Fm	206.7	237.0	True	441.8
269	45376	Bass-SS	10.1016/j.precamres.2017.03.006	1910.4	74.0	1898.8	50.8	1886.2	69.6	101.28300286289895	sandstone	sedimentary	491	36862	3996	Bass Limestone	1244.0	1250.0	True	1886.2
270	40697	RB12-08	10.2475/06.2015.02	155.5	28.8	166.0	66.2	317.3	895.0	49.00724866057359	sandstone	sedimentary	413	11097	2972	Orca Gp	53.95	64.9	True	155.5
271	34754	AE1	10.1029/2005TC001830	1334.0	26.0	1478.0	38.0	1691.0	41.0	78.8882318154938	sandstone	sedimentary	1545	35561	8952	Bjorne Fm	247.2	251.6755	False	1334.0
272	34919	45-2-4-06-1	10.1130/GES00982.1	426.1	13.8	431.9	19.6				sandstone	sedimentary	825	22959	6465	Diablo Fm of Palm Spring Gp	2.588	4.0333	True	426.1
273	29334	303569	10.1130/L420.1					2724.0	22.0		quartzite	metamorphic	1585	36012	9111	Polkorridoren Gp	521.0	523.0	True	2724.0	Cambrian
274	28676	05SP14-20	10.1130/B30029.1	1252.8	32.8	1295.9	34.6	1367.9	72.3	91.58564222530887	conglomerate	sedimentary	465	13948	3704	Sheep Pass Fm	34.875	46.175	True	1252.8	Cenozoic
275	28686	3-25-04-4	10.1130/B30206.1	1395.3	39.2	1518.9	31.8	1695.6	47.0	82.2894550601557	sandstone	sedimentary	35	2899	528	McCoy Mountains Fm	116.0	168.8	False	1395.3
276	40670	LB4	10.1306/10191515029	983.2	17.4	979.9	19.2	972.5	48.4	101.10025706940874	sandstone	sedimentary	1625	37218	9542	McMurray Fm	111.75	125.0	True	983.2	Mesozoic
277	43168	BENYON-316	10.2110/jsr.2014.16	1901.5	32.2	1911.1	23.2	1921.6	33.0	98.95399666944213	sandstone	sedimentary	1625	37218	9542	McMurray Fm	111.75	125.0	True	1901.5	Mesozoic
278	40667	LB1	10.1306/10191515029	1009.8	35.0	1006.7	36.4	1000.0	87.6	100.98	sandstone	sedimentary	1625	37218	9542	McMurray Fm	111.75	125.0	True	1009.8	Mesozoic
279	28755	33516	10.1130/B30503.1	1389.4	17.0	1382.5	15.1	1372.0	20.3	101.26822157434403	sandstone	sedimentary	1546	35581	8957	Danish River Fm	412.9	419.2	True	1389.4	Paleozoic*
280	35325	Nestucca	10.1130/G33746.1	170.0	136.0						sandstone	sedimentary	266	7119	1824	Nestucca Fm	40.1333	40.7167	True	170.0
281	29182	XOM-MDB-72	10.1130/G35513.1	103.4	4.6	105.7	12.4	158.6	269.2	65.19546027742749	sandstone	sedimentary	521	16441	4287	Wilcox Gp	49.85	58.4	True	103.4
282	35317	GVG18	10.1130/G33746.1	61.7	3.8	61.6	42.0				sandstone	sedimentary	251	6864	1743	Lower Markley Sandstone Mbr	40.425	42.925	True	61.7
283	35317	GVG18	10.1130/G33746.1	61.7	3.8	61.6	42.0				sandstone	sedimentary	251	6862	1743	Upper Markley Sandstone Mbr	37.8	38.675	True	61.7
284	43174	12-LHCC06	10.2110/jsr.2014.33	1685.3	281.8	1690.5	156.8	1697.0	8.2	99.31054802592811	sandstone	sedimentary	491	15053	4003	Straight Cliffs Sandstone	87.175	95.55	True	1697.0	Mesozoic
285	43177	12-PC12	10.2110/jsr.2014.33	1019.2	40.6	1045.8	79.8	1101.9	229.2	92.49478174062982	sandstone	sedimentary	491	15052	4003	Wahweap Sandstone	84.275	87.175	True	1019.2	Mesozoic
286	43169	BENYON-216	10.2110/jsr.2014.16	255.6	8.8	245.3	46.4	147.5	494.0	173.28813559322035	sandstone	sedimentary	1625	37220	9542	Wabiskaw Fm	109.25	110.5	True	255.6
287	45602	Carb-Canyon	https://doi.org/10.1130/B31532.1	1736.0	50.0	1755.0	52.0	1777.0	35.0	97.69274057400112	sandstone	sedimentary	491	36854	9433	Carbon Canyon Member	748.0	753.6	True	1777.0
288	43169	BENYON-216	10.2110/jsr.2014.16	1401.8	90.4	1445.1	55.6	1509.5	13.0	92.86518714806228	sandstone	sedimentary	1625	37220	9542	Wabiskaw Fm	109.25	110.5	True	1509.5	Mesozoic
289	28572	I4	10.1130/B30120.1	1797.9	19.3	1867.7	37.6	1927.6	38.9	93.2714256069724	sandstone	sedimentary	1657	38191	9877	Imperial Fm	362.225	382.7	False	1797.9
290	43176	12-LHCC07	10.2110/jsr.2014.33	1687.6	34.2	1686.9	19.2	1686.0	7.5	100.09489916963227	sandstone	sedimentary	491	15052	4003	Wahweap Sandstone	84.275	87.175	True	1686.0	Mesozoic
291	34014	CO13-Ec-1Jmt	10.1130/L467.1	1963.7	30.9	1970.5	17.4	1977.7	14.5	99.29210699297164	sandstone	sedimentary	500	15412	4091	Morrison Fm	150.325	157.3	True	1977.7	Mesozoic
292	40702	11HW-33	10.2475/06.2015.02	94.3	4.4	92.7	13.0	50.7	332.6	185.99605522682447	sandstone	sedimentary	413	11097	2972	Orca Gp	53.95	64.9	True	94.3
293	28652	3DB69	10.1130/B30235.1	2060.0	41.0	2058.3	31.6	2056.6	48.0	100.16532140425946	sandstone	sedimentary	510	15822	4187	Indian Meadows Fm	53.95	56.0	True	2060.0	Cenozoic
294	28716	BTC	10.1130/G31762.1	2335.4	48.0	2395.1	25.2	2446.2	20.7	95.47052571335132	conglomerate	sedimentary	1641	37797	9719	Cadomin Fm	122.0	126.1	False	2446.2
295	37458	ES	10.1130/GES01313.1	80.4	3.9	88.8	7.4	322.1	175.3	24.961192176342752	sandstone	sedimentary	519	16322	4277	Seguin Fm	58.4	58.8	False	80.4
296	28633	K061121	10.1130/G31335.1	2599.2	74.0	2602.9	41.2	2605.7	45.4	99.75054687799823	metasedimentary	metamorphic	491	15025	3995	Vishnu Schist	1690.0	1887.5	True	2605.7
297	43201	CP44	10.2110/jsr.2008.088	1227.2	22.3	1218.2	20.8	1202.3	42.2	102.0710305248274	sandstone	sedimentary	502	15475	4108	Chinle Fm	228.6667	230.3333	True	1227.2	Mesozoic
298	42911	IB-M1	http://ir.uiowa.edu/etd/3119	458.0	11.4	459.0	13.2	464.0	54.6	98.70689655172414	sandstone	sedimentary	83	3118	629	Caseyville Fm	319.0	320.05	True	458.0
299	29943	CG11-9	10.1130/GES00917.1	172.7	2.1	170.8	4.6	140.6	66.2	122.83072546230441	sandstone	sedimentary	518	16242	4268	Fleming Fm	5.333	15.97	True	172.7
300	29093	CS12-1	10.1130/B30884.1	1863.0	53.0	1850.0	35.0	1836.0	23.0	101.47058823529412	sandstone	sedimentary	54	1940	302	Lanoria Quartzite	1034.0	1101.0	True	1836.0
301	28648	2DB2	10.1130/B30235.1	1794.6	64.2	1785.6	73.4	1775.0	140.0	101.10422535211268	sandstone	sedimentary	486	16049	4243	Wind River Fm	47.8	53.95	True	1794.6	Cenozoic
302	29936	CG11-2	10.1130/GES00917.1	1402.0	26.0	1413.0	17.0	1426.0	29.6	98.31697054698458	sandstone	sedimentary	525	16764	4317	Catahoula Fm	20.44	26.41	True	1402.0	Cenozoic
303	28733	6152	10.1130/B30260.1	175.1	3.2			128.6	53.8	136.15863141524105	sandstone	sedimentary	290	7501	1979	Hyde Fm	176.25	180.55	True	175.1
304	40659	KE1	10.1306/10191515029	1201.6	86.4	1190.0	137.6	1168.9	355.8	102.79750192488665	sandstone	sedimentary	1625	37218	9542	McMurray Fm	111.75	125.0	True	1201.6	Mesozoic
305	29094	CS12-3	10.1130/B30884.1	527.0	14.0	528.0	13.0	537.0	13.0	98.13780260707635	sandstone	sedimentary	57	2075	10064	Van Horn Sandstone	515.19	519.6	True	537.0
306	40692	11SJO-34	10.2475/06.2015.02	98.0	3.6	92.5	38.4				sandstone	sedimentary	414	11105	2979	Sitkalidak Fm	32.595	42.925	True	98.0
307	40657	CW2	10.1306/10191515029	254.4	7.4	268.8	31.4	395.8	291.4	64.27488630621527	sandstone	sedimentary	1625	37218	9542	McMurray Fm	111.75	125.0	True	254.4
308	40671	LL2	10.1306/10191515029	1850.6	38.0	1844.9	23.4	1838.4	25.2	100.66362053959965	sandstone	sedimentary	1625	37218	9542	McMurray Fm	111.75	125.0	True	1838.4	Mesozoic
309	37469	OK-2	10.1130/GES01316.1	1054.3	13.1	1067.2	10.1	1093.7	14.2	96.39754960226753	sandstone	sedimentary	158	5568	1306	Pontotoc Gp	282.0	300.1	True	1054.3	Paleozoic*
310	35702	11RMSS3	10.1016/j.precamres.2014.06.005	1734.1	34.8	1753.7	20.0	1777.0	12.0	97.58581879572313	sandstone	sedimentary	464	13874	3691	Beck Spring Dolomite	677.5	686.0	True	1777.0
311	30310	GVG09-15	10.1130/B31065.1	89.4	1.6	89.1	12.0	78.8	334.6	113.4517766497462	sandstone	sedimentary	252	6880	1748	Deer Valley Fm	66.0	67.525	True	89.4
312	35328	Tyee	10.1130/G33746.1	61.0	12.0						sandstone	sedimentary	266	7121	1825	Tyee Fm	45.6334	46.7166	True	61.0
313	42909	FCB-D3	http://ir.uiowa.edu/etd/3119	1447.0	37.0	1447.0	32.6	1447.0	59.6	100.0	sandstone	sedimentary	80	2986	581	Cherokee Gp	310.5	317.25	True	1447.0	Paleozoic*
314	35262	36EAB09-LA	10.1130/B30860.1	2482.1	81.0	2450.7	38.0	2424.7	20.6	102.36730317152637	diamictite	sedimentary	477	14498	3843	Perry Canyon Fm	663.3331	668.0557	True	2424.7
315	34913	39-FC126	10.1130/GES00982.1	2047.9	31.4	2035.0	17.2	2022.1	14.2	101.27590129073735	sandstone	sedimentary	222	6547	1598	Imperial Fm	3.347	4.0333	True	2022.1	Cenozoic
316	29115	XOM-AOS-25	10.1130/G35513.1	1053.7	26.0	1054.8	19.6	1057.2	26.6	99.66893681422626	sandstone	sedimentary	1625	37218	9542	McMurray Fm	111.75	125.0	True	1053.7	Mesozoic
317	28702	Lower_Hermit	10.1130/L121.1	963.0	36.0	965.0	36.0	970.0	86.0	99.27835051546391	sandstone	sedimentary	491	15036	4000	Hermit Shale	279.7375	282.0	True	963.0	Paleozoic*
318	28696	Coconino1	10.1130/L121.1	329.0	16.0	344.0	36.0	448.0	248.0	73.4375	sandstone	sedimentary	491	15035	4000	Coconino Sandstone	275.2125	279.7375	True	329.0
319	29200	51204	10.1130/B30999.1	974.3	19.6	973.3	21.3	970.8	53.5	100.3605274000824	sandstone	sedimentary	481	14708	3905	Kelvin Fm	103.625	141.1	True	974.3	Mesozoic
320	28681	07NW2	10.1130/B30029.1	1044.3	9.6	1043.8	12.4	1042.5	32.8	100.1726618705036	siltstone	sedimentary	463	13837	3673	Newark Canyon Fm	113.0	122.0	True	1044.3	Mesozoic
321	28508	UT0711	10.1130/G30684.1	1068.3	19.6	1070.3	38.0	1074.6	108.0	99.41373534338358	conglomerate	sedimentary	482	14737	3914	Indianola Gp	83.6	145.0	True	1068.3	Mesozoic
322	37269	5TA09	10.1130/L557.1	1782.0	29.0	1792.0	24.0	1803.0	40.0	98.83527454242929	quartzite	metamorphic	325	8781	2219	Kinnikinic Quartzite	456.5	470.0	True	1782.0	Paleozoic*
323	34902	28-32003-07	10.1130/GES00982.1	1583.4	43.4	1653.1	44.0	1742.8	80.8	90.85379848519624	alluvium	sedimentary	35	1731	221	Bouse Fm	4.0333	5.6518	False	1583.4
324	43203	CP48	10.2110/jsr.2008.088	525.4	11.0	528.7	15.7	543.0	68.2	96.75874769797421	sandstone	sedimentary	490	15003	3990	Chinle Fm	201.3	232.0	True	525.4
325	35708	4CD13	10.1016/j.precamres.2014.06.005	1670.4	24.4	1666.2	20.8	1660.8	35.6	100.57803468208093	sandstone	sedimentary	464	13894	3692	Noonday Dolomite	569.2	578.6	True	1670.4
326	37758	7-30a	https://uh-ir.tdl.org/uh-ir/handle/10657/964	95.8	3.4	100.7	7.3	219.0	160.7	43.74429223744292	sandstone	sedimentary	1633	37499	9607	Dunvegan Fm	95.0	96.1	True	95.8
327	45599	LC-Canyon	https://doi.org/10.1130/B31532.1	1108.0	20.0	1104.0	36.0	1098.0	46.8	100.91074681238617	sandstone	sedimentary	491	36854	9433	Carbon Canyon Member	748.0	753.6	True	1108.0
328	33994	YGS08-MC091	10.1130/L451.1	211.0	8.0	215.0	8.0	257.0	44.0	82.1011673151751	sandstone	sedimentary	1454	33651	8228	Laberge	169.8	199.8	True	211.0
329	34410	Rome1	10.1130/G20727.1	1325.0	90.0	1347.0	230.0	1382.0	58.0	95.87554269175108	sandstone	sedimentary	7	115	39	Rome Fm	511.0	514.75	True	1382.0	Cambrian
330	28674	05KC01	10.1130/B30029.1	34.8	0.6	35.7	1.0	101.3	50.7	34.35340572556762	sandstone	sedimentary	465	13947	3704	Kinsey Canyon Fm	33.9	34.875	True	34.8
331	29157	XOM-MDB-46	10.1130/G35513.1	1663.6	91.4	1694.2	53.2	1732.3	30.6	96.03417421924608	sandstone	sedimentary	165	5752	1344	Wilcox Gp	41.3	56.0	True	1732.3	Cenozoic
332	29192	51101	10.1130/B30999.1	618.0	11.9	619.7	16.0	626.3	60.4	98.67475650646655	sandstone	sedimentary	512	15908	8850	Lakota Fm	138.075	145.0	True	618.0	Mesozoic
333	42908	FCB-D2	http://ir.uiowa.edu/etd/3119	1702.0	45.6	1770.0	29.8	1851.0	32.8	91.95029713668288	sandstone	sedimentary	90	3423	691	Cherokee Gp	311.0	319.0	False	1851.0
334	29108	XOM-AOS-12	10.1130/G35513.1	164.4	9.6	156.8	19.8	44.0	295.8	373.6363636363636	sandstone	sedimentary	1625	37221	9542	Grand Rapids Fm	108.0	109.25	True	164.4
335	32526	102-98-744	10.1016/j.precamres.2013.09.012					2865.9	8.2		sandstone	sedimentary	776	22250	6173	Island Lake Gp unnamed 1	2710.0	2740.0	True	2865.9
336	32526	102-98-744	10.1016/j.precamres.2013.09.012					2865.9	8.2		sandstone	sedimentary	776	22249	6173	Island Lake Gp unnamed 2	2680.0	2710.0	True	2865.9
337	42909	FCB-D3	http://ir.uiowa.edu/etd/3119	1146.0	30.6	1150.0	26.0	1158.0	48.0	98.96373056994818	sandstone	sedimentary	80	2986	581	Cherokee Gp	310.5	317.25	True	1146.0	Paleozoic*
338	28881	09SL2	10.1130/B30657.1	1247.0	60.0	1256.0	58.0	1272.0	118.0	98.03459119496856	sandstone	sedimentary	52	1873	281	Bliss Fm	483.475	493.575	True	1247.0	Cambrian
339	43204	CP50	10.2110/jsr.2008.088	1095.1	38.9	1095.0	29.4	1094.8	41.5	100.02740226525393	sandstone	sedimentary	494	15143	4021	Dolores Fm	222.375	229.5	True	1095.1	Mesozoic
340	29194	51103	10.1130/B30999.1	2075.2	59.5	2102.0	30.8	2128.4	15.8	97.5004698364969	sandstone	sedimentary	512	15909	8850	Morrison Fm	145.0	158.3334	True	2128.4	Mesozoic
341	34752	94CL53	10.1029/2005TC001830	321.0	10.0	343.0	45.0				sandstone	sedimentary	155	5367	1272	Otuk Fm	168.8	247.2	True	321.0
342	40671	LL2	10.1306/10191515029	1855.0	28.8	1851.9	24.4	1848.4	40.8	100.3570655702229	sandstone	sedimentary	1625	37218	9542	McMurray Fm	111.75	125.0	True	1855.0	Mesozoic
343	29328	WM170	10.1130/B31142.1	1699.0	28.0	1719.0	20.0	1796.7	19.4	94.5622530194245	argillite	sedimentary	459	13634	3603	Wyman Fm	573.9	583.3	True	1796.7
344	29175	XOM-MDB-65	10.1130/G35513.1	1441.8	61.0	1441.4	37.6	1440.9	24.4	100.06246096189881	sandstone	sedimentary	519	16319	4277	Wilcox Fm	49.85	53.95	True	1440.9	Cenozoic
345	29051	DK0108	10.1130/B30824.1	986.8	31.0	1015.3	30.8	1077.3	68.4	91.59936879235124	sandstone	sedimentary	515	15992	4229	Cloverly Fm	130.275	145.0	True	986.8	Mesozoic
346	45593	L-Nankoweap	https://doi.org/10.1130/B31532.1	1027.0	38.0	1014.0	32.0	985.0	49.4	104.26395939086294	sandstone	sedimentary	491	36857	9434	Nankoweap Fm	767.6	770.4	True	1027.0
347	28698	Esplanade	10.1130/L121.1	2719.0	60.0	2732.0	40.0	2742.0	52.0	99.16119620714807	sandstone	sedimentary	491	15037	4000	Supai Fm	282.0	313.75	True	2742.0	Paleozoic*
348	29938	CG11-4	10.1130/GES00917.1	1714.0	29.0	1719.0	16.0	1722.0	37.0	99.53542392566783	sandstone	sedimentary	523	16617	4300	Cook Mountain Fm	38.675	40.1333	True	1714.0	Cenozoic
349	42912	IB-D1	http://ir.uiowa.edu/etd/3119	1525.0	27.2	1530.0	21.2	1538.0	33.4	99.15474642392718	sandstone	sedimentary	432	13132	3464	Bernadotte Sandstone Mbr	312.9333	313.8813	True	1525.0	Paleozoic*
350	28741	09ANJ06	10.1130/L131.1	77.4	4.4	82.8	27.8				sandstone	sedimentary	413	11096	2971	Valdez Gp	67.525	83.6	True	77.4
351	29109	XOM-AOS-16	10.1130/G35513.1	160.5	3.6	164.5	9.8	222.0	139.2	72.29729729729729	sandstone	sedimentary	1625	37219	9542	Clearwater Fm	110.5	111.75	True	160.5
352	37465	STQ	10.1130/GES01313.1	101.8	6.0	99.6	11.2				sandstone	sedimentary	520	16418	4285	Simsboro Sand Mbr	56.0	56.8	True	101.8
353	34752	94CL53	10.1029/2005TC001830	1816.0	14.0	1892.0	26.0	1977.0	26.0	91.85634800202327	sandstone	sedimentary	155	5367	1272	Otuk Fm	168.8	247.2	False	1816.0
354	28688	3-26-04-23	10.1130/B30206.1	1418.4	30.0	1438.6	27.8	1468.6	52.2	96.58177856461937	sandstone	sedimentary	35	2899	528	McCoy Mountains Fm	116.0	168.8	True	1418.4	Mesozoic
355	41555	61206-2	10.2475/05.2010.01	407.3	13.6						quartzite	metamorphic	377	10407	2689	Gile Mountain Fm	410.0	412.9	True	407.3
356	29200	51204	10.1130/B30999.1	159.6	3.8	153.9	10.5	67.0	165.6	238.2089552238806	sandstone	sedimentary	481	14708	3905	Kelvin Fm	103.625	141.1	True	159.6
357	30875	TMS001	http://digitalscholarship.unlv.edu/thesesdissertations/1522/	392.0	7.2	398.1	7.0	433.6	21.8	90.4059040590406	sandstone	sedimentary	468	14065	3728	Muddy Creek Fm	5.333	11.62	True	392.0
358	30314	GVG09-2	10.1130/B31065.1	1648.2	34.2	1698.6	31.4	1761.4	54.6	93.57329397070512	conglomerate	sedimentary	255	6914	1755	Lathrop Sand	74.975	75.55	False	1648.2
359	30314	GVG09-2	10.1130/B31065.1	1648.2	34.2	1698.6	31.4	1761.4	54.6	93.57329397070512	conglomerate	sedimentary	255	6909	1755	Ragged Valley Silt	69.5838	71.0935	False	1648.2
360	40699	11HW-09	10.2475/06.2015.02	58.4	2.8	62.5	19.8	221.4	752.2	26.377597109304425	sandstone	sedimentary	413	11097	2972	Orca Gp	53.95	64.9	True	58.4
361	45599	LC-Canyon	https://doi.org/10.1130/B31532.1	1086.0	28.0	1146.0	40.0	1262.0	52.0	86.05388272583201	sandstone	sedimentary	491	36854	9433	Carbon Canyon Member	748.0	753.6	False	1086.0
362	28710	Toroweap1	10.1130/L121.1	452.0	12.0	485.0	22.0	644.0	104.0	70.1863354037267	sandstone	sedimentary	491	15034	4000	Toroweap Fm	269.4875	275.2125	False	452.0
363	28530	IONA	10.1130/G30509.1	1071.0	42.2	1051.0	31.2	1009.5	43.0	106.0921248142645	sandstone	sedimentary	429	11400	3071	Red and Green Beds	308.1	309.9	True	1071.0	Paleozoic*
364	37782	08-164	http://ir.uiowa.edu/etd/3496/	596.0	94.0	605.0	76.0	640.0	70.0	93.125	greywacke	sedimentary	1560	35737	9001	Danish River Fm	427.4	438.5	True	640.0	Paleozoic*
365	42910	FCB-D4	http://ir.uiowa.edu/etd/3119	616.0	20.4	617.0	26.4	620.0	97.6	99.35483870967742	sandstone	sedimentary	89	3399	688	Cherokee Gp	311.0	319.0	True	616.0	Paleozoic*
366	30821	17PL02	http://www.mbmg.mtech.edu/pdf-open-files/mbmg569/mbmg569.pdf	63.9	1.6						sandstone	sedimentary	332	9034	2282	Renova Fm	23.03	38.675	True	63.9
367	43164	BENYON-269	10.2110/jsr.2014.16	1164.3	32.0	1159.0	24.2	1149.2	35.6	101.31395753567699	sandstone	sedimentary	1625	37218	9542	McMurray Fm	111.75	125.0	True	1164.3	Mesozoic
368	40701	11HW-32	10.2475/06.2015.02	62.2	8.2	55.1	21.4				sandstone	sedimentary	413	11097	2972	Orca Gp	53.95	64.9	True	62.2
369	43186	TRU	10.2110/jsr.2008.088	243.4	3.4	256.4	19.2	377.0	72.0	64.56233421750663	sandstone	sedimentary	71	2538	461	Trujillo Fm	227.0	237.0	True	243.4
370	35281	Samp09	http://gsabulletin.gsapubs.org/content/113/10/1343.short	989.0	10.0	991.0	10.0	995.0	10.0	99.39698492462311	sandstone	sedimentary	476	14439	3832	Caddy Canyon Quartzite	569.6875	598.375	True	989.0
371	40922	DR1	10.2475/01.2007.05	1650.6	36.0			1594.0	46.0	103.55081555834379	metasedimentary	metamorphic	387	10587	2762	Hebron Gneiss	420.15	449.0	True	1650.6	Paleozoic*
372	42909	FCB-D3	http://ir.uiowa.edu/etd/3119	1048.0	31.4	1062.0	28.4	1092.0	56.6	95.97069597069597	sandstone	sedimentary	80	2986	581	Cherokee Gp	310.5	317.25	True	1048.0	Paleozoic*
373	28692	06GC156	10.1130/L121.1	1058.0	20.0	1074.0	44.0	1106.0	130.0	95.66003616636527	sandstone	sedimentary	491	15037	4000	Supai Fm	282.0	313.75	True	1058.0	Paleozoic*
374	28578	T4	10.1130/B30120.1	1982.8	46.9	1901.5	84.1	1923.5	81.2	103.08292175721341	sandstone	sedimentary	1657	38191	9877	Imperial Fm	362.225	382.7	True	1982.8	Paleozoic*
375	29158	XOM-MDB-47	10.1130/G35513.1	954.6	30.0	971.7	34.2	1010.6	86.8	94.45873738373244	sandstone	sedimentary	165	5752	1344	Wilcox Gp	41.3	56.0	True	954.6	Cenozoic
376	34158	Parry5	10.1139/e2012-067	1125.9	28.8	1125.4	41.3	1127.1	21.9	99.89353207346286	sandstone	sedimentary	1527	35189	8870	Parry Islands Fm	362.225	374.825	True	1127.1	Paleozoic*
377	43649	n4473	10.1144/jgs2014-027	423.0	10.0	429.0	16.0	462.0	78.0	91.55844155844156	sandstone	sedimentary	1562	35765	9021	Danish River Fm	427.4	438.5	True	423.0
378	40789	NHZ	10.2475/10.2012.01	1200.4	19.2			1176.0	60.0	102.07482993197279	quartzite	metamorphic	384	10532	2734	Massabesic Gneiss	443.8	477.7	True	1200.4	Paleozoic*
379	35703	11RMSS5	10.1016/j.precamres.2014.06.005	1413.5	32.0	1397.0	22.2	1371.8	28.4	103.0398017203674	greywacke	sedimentary	464	13874	3691	Beck Spring Dolomite	677.5	686.0	True	1371.8
380	40918	ME-K	10.2475/01.2007.05	1463.8	28.6			1437.0	78.0	101.86499652052888	quartzite	metamorphic	385	10563	2747	Kittery Fm	448.05	450.0	True	1463.8	Paleozoic*
381	28706	Tapeats1	10.1130/L121.1	1435.0	72.0	1433.0	48.0	1430.0	54.0	100.34965034965035	sandstone	sedimentary	491	15029	3997	Tapeats Sandstone	506.75	508.775	True	1430.0	Cambrian
382	35260	25EAB10	10.1130/B30860.1	1099.7	102.2	1131.5	71.4	1193.0	52.6	92.17937971500419	quartzite	metamorphic	477	14498	3843	Perry Canyon Fm	663.3331	668.0557	True	1193.0
383	34411	Rome2	10.1130/G20727.1	1186.0	38.0	1273.0	238.0	1423.0	90.0	83.34504567814477	sandstone	sedimentary	8	136	46	Rome Fm	511.0	514.75	True	1186.0	Cambrian
384	28686	3-25-04-4	10.1130/B30206.1	1780.7	79.0	1814.6	44.6	1853.7	25.6	96.06193019366673	sandstone	sedimentary	35	2899	528	McCoy Mountains Fm	116.0	168.8	True	1853.7	Mesozoic
385	29058	FH0108	10.1130/B30824.1	2691.8	80.0	2805.7	41.8	2888.6	39.6	93.18701100879319	sandstone	sedimentary	515	15985	4229	Fort Union Fm	50.5333	66.0	False	2888.6
386	40688	JG09-05	10.2475/06.2015.02	92.5	2.4	92.2	12.8	84.0	336.6	110.11904761904762	sandstone	sedimentary	414	11108	2980	Kodiak Fm	66.0	72.1	True	92.5
387	28513	UT4	10.1130/G30684.1	1686.2	64.6	1685.6	41.0	1684.8	45.0	100.08309591642924	conglomerate	sedimentary	502	15469	4106	Cedar Mountain Fm	122.0	125.0	True	1684.8	Mesozoic
388	28696	Coconino1	10.1130/L121.1	398.0	22.0	405.0	30.0	444.0	144.0	89.63963963963964	sandstone	sedimentary	491	15035	4000	Coconino Sandstone	275.2125	279.7375	True	398.0
389	37781	08-209	http://ir.uiowa.edu/etd/3496/	1422.0	90.0	1448.0	110.0	1486.0	232.0	95.69313593539704	conglomerate	sedimentary	1571	35874	9069	Cranstone Fm	438.5	443.8	True	1422.0	Paleozoic*
390	28648	2DB2	10.1130/B30235.1	439.7	9.0	441.4	17.2	450.6	96.0	97.58100310696848	sandstone	sedimentary	486	16049	4243	Wind River Fm	47.8	53.95	True	439.7
391	28637	OS081084	10.1130/G31335.1	1754.9	61.4	1750.4	46.6	1745.1	71.4	100.56157240272763	metasedimentary	metamorphic	491	15025	3995	Vishnu Schist	1690.0	1887.5	True	1754.9
392	28510	UT0715	10.1130/G30684.1	1990.8	58.2	1996.3	40.4	2001.9	55.4	99.4455267495879	conglomerate	sedimentary	502	15469	4106	Cedar Mountain Fm	122.0	125.0	True	2001.9	Mesozoic
393	43164	BENYON-269	10.2110/jsr.2014.16	2706.4	64.0	2700.6	39.4	2696.2	49.8	100.37831021437579	sandstone	sedimentary	1625	37218	9542	McMurray Fm	111.75	125.0	True	2696.2	Mesozoic
394	37272	9TD10	10.1130/L557.1	1812.0	22.0	1831.0	13.0	1853.0	8.0	97.78737182946573	quartzite	metamorphic	325	8781	2219	Kinnikinic Quartzite	456.5	470.0	True	1853.0	Paleozoic*
395	43166	BENYON-190	10.2110/jsr.2014.16	487.3	42.0	546.7	54.2	802.5	192.4	60.72274143302181	sandstone	sedimentary	1625	37218	9542	McMurray Fm	111.75	125.0	True	487.3
396	32525	102-97-481	10.1016/j.precamres.2013.09.012					2765.0	8.2		sandstone	sedimentary	776	22250	6173	Island Lake Gp unnamed 1	2710.0	2740.0	True	2765.0
397	32525	102-97-481	10.1016/j.precamres.2013.09.012					2765.0	8.2		sandstone	sedimentary	776	22249	6173	Island Lake Gp unnamed 2	2680.0	2710.0	True	2765.0
398	28717	CDM	10.1130/G31762.1	630.9	15.0	633.9	14.8	644.3	40.5	97.92022349837032	conglomerate	sedimentary	1632	37456	9595	Cadomin Fm	122.0	125.0	True	630.9	Mesozoic
399	28735	7015	10.1130/B30260.1	631.5	27.2			753.9	38.2	83.76442499005174	sandstone	sedimentary	290	7498	1979	Lonesome Fm	163.5	164.15	True	631.5	Mesozoic
400	34004	TB1-TB2	10.1130/L451.1	200.7	9.0	160.0	52.0				sandstone	sedimentary	1454	33654	8226	Tantalus	126.1	150.325	True	200.7
401	28679	06SP21-22	10.1130/B30029.1	1101.6	10.6	1094.5	25.9	1080.3	74.8	101.97167453485143	conglomerate	sedimentary	465	13948	3704	Sheep Pass Fm	34.875	46.175	True	1101.6	Cenozoic
402	34564	741-1	10.1130/B26399.1	1558.3	46.2			1531.0	82.0	101.78314826910515	greywacke	sedimentary	548	17639	4574	Franciscan Subduction Complex	139.8	150.325	True	1558.3	Mesozoic
403	37272	9TD10	10.1130/L557.1	2298.0	43.0	2333.0	23.0	2364.0	20.0	97.20812182741116	quartzite	metamorphic	325	8781	2219	Kinnikinic Quartzite	456.5	470.0	True	2364.0	Paleozoic*
404	28513	UT4	10.1130/G30684.1	1773.5	27.6	1801.5	42.8	1834.0	86.2	96.70119956379499	conglomerate	sedimentary	502	15469	4106	Cedar Mountain Fm	122.0	125.0	True	1773.5	Mesozoic
405	37469	OK-2	10.1130/GES01316.1	1760.6	18.3	1785.9	11.2	1815.5	10.9	96.97603965849628	sandstone	sedimentary	158	5568	1306	Pontotoc Gp	282.0	300.1	False	1815.5
406	42911	IB-M1	http://ir.uiowa.edu/etd/3119	1581.0	27.8	1606.0	24.6	1639.0	42.8	96.46125686394143	sandstone	sedimentary	83	3118	629	Caseyville Fm	319.0	320.05	True	1581.0	Paleozoic*
407	28697	Coconino2	10.1130/L121.1	1051.0	24.0	1060.0	28.0	1080.0	68.0	97.31481481481481	sandstone	sedimentary	491	15035	4000	Coconino Sandstone	275.2125	279.7375	True	1051.0	Paleozoic*
408	37261	09LR01	10.1130/L557.1	1861.0	42.0			1822.0	32.0	102.14050493962678	quartzite	metamorphic	325	8781	2219	Kinnikinic Quartzite	456.5	470.0	True	1822.0	Paleozoic*
409	34157	Blackley2	10.1139/e2012-067	444.6	25.9	449.5	30.0	419.4	33.9	106.00858369098712	sandstone	sedimentary	1519	35002	8813	Blackley Fm	389.1	391.9	True	444.6
410	45598	CDGC6	https://doi.org/10.1130/B31532.1	1262.0	80.0	1263.0	58.0	1265.0	104.0	99.76284584980237	sandstone	sedimentary	491	36857	9434	Nankoweap Fm	767.6	770.4	True	1262.0
411	29116	XOM-MDB-01	10.1130/G35513.1	1042.2	18.4	1042.5	15.4	1043.2	28.2	99.90414110429448	sandstone	sedimentary	526	16848	4323	Lower Frio Mbr	26.8325	27.4663	True	1042.2	Cenozoic
412	29116	XOM-MDB-01	10.1130/G35513.1	1042.2	18.4	1042.5	15.4	1043.2	28.2	99.90414110429448	sandstone	sedimentary	526	16847	4323	Middle Frio Mbr	24.9313	26.8325	True	1042.2	Cenozoic
413	29116	XOM-MDB-01	10.1130/G35513.1	1042.2	18.4	1042.5	15.4	1043.2	28.2	99.90414110429448	sandstone	sedimentary	526	16846	4323	Upper Frio Mbr	24.2975	24.9313	True	1042.2	Cenozoic
414	40235	05LF13	10.1130/L533.1	1787.0	70.0	1813.0	40.0	1870.0	40.0	95.56149732620321	sandstone	sedimentary	152	5332	1258	Neruokpuk Quartzite	541.0	598.375	True	1870.0	Cambrian
415	35708	4CD13	10.1016/j.precamres.2014.06.005	1069.6	18.4	1058.1	28.8	1034.4	80.0	103.40293890177881	sandstone	sedimentary	464	13894	3692	Noonday Dolomite	569.2	578.6	True	1069.6
416	30340	Santiago	10.1130/B31065.1	92.4	9.2	75.8	11.6				sandstone	sedimentary	208	6392	1543	Santiago Fm	32.45	47.8	False	92.4
417	28997	09AnJ11a	10.1130/B30818.1	357.0	18.0	363.0	18.0				sandstone	sedimentary	413	11096	2971	Valdez Gp	67.525	83.6	True	357.0
418	28860	CHA108	http://specialpapers.gsapubs.org/content/487/63.abstract	80.1	0.4	73.4	7.6				sandstone	sedimentary	332	9034	2282	Renova Fm	23.03	38.675	True	80.1
419	35722	NR9	10.1016/j.precamres.2012.02.017	1783.4	26.0			1726.0	32.0	103.32560834298957	sandstone	sedimentary	466	13993	3712	Stirling Quartzite	867.5065	1193.9935	True	1783.4
420	34002	C1	10.1130/L451.1	189.2	3.8	183.0	18.0	104.0	260.0	181.92307692307693	conglomerate	sedimentary	1454	33654	8226	Tantalus	126.1	150.325	True	189.2
421	35246	1103NC1	10.1130/B30848.1	1110.2	25.2	1103.2	27.2	1089.4	63.8	101.909307875895	sandstone	sedimentary	1658	38206	9884	Keele Fm	656.25	666.875	True	1110.2
422	35719	J14A	10.1016/j.precamres.2012.02.017	1908.4	30.0			1808.0	34.0	105.55309734513274	sandstone	sedimentary	467	14028	3718	Johnnie Fm	564.5	576.25	True	1908.4
423	29940	CG11-6	10.1130/GES00917.1	104.3	1.3	103.6	1.7	115.0	55.0	90.69565217391305	sandstone	sedimentary	523	16616	4300	Cockfield Fm	37.8	38.675	True	104.3
424	40788	MIL1	10.2475/10.2012.01	399.0	9.2						paragneiss	metamorphic	384	10532	2734	Massabesic Gneiss	443.8	477.7	True	399.0
425	34337	LQZT	10.1130/0-8137-1197-5.459	1510.0	76.0			1376.0	128.0	109.73837209302326	sandstone	sedimentary	353	10010	2524	Metcalf Phyllite	603.883	678.7	True	1510.0
426	34337	LQZT	10.1130/0-8137-1197-5.459	1510.0	76.0			1376.0	128.0	109.73837209302326	sandstone	sedimentary	353	10009	2524	Wading Branch Fm	664.93	678.7	True	1510.0
427	34337	LQZT	10.1130/0-8137-1197-5.459	1510.0	76.0			1376.0	128.0	109.73837209302326	sandstone	sedimentary	353	10008	2524	Longarm Quartzite	617.5015	664.93	True	1510.0
428	34337	LQZT	10.1130/0-8137-1197-5.459	1510.0	76.0			1376.0	128.0	109.73837209302326	sandstone	sedimentary	353	10007	2524	Roaring Fork Sandstone	617.194	617.5015	True	1510.0
429	34337	LQZT	10.1130/0-8137-1197-5.459	1510.0	76.0			1376.0	128.0	109.73837209302326	sandstone	sedimentary	353	10006	2524	Pigeon Siltstone	603.883	617.194	True	1510.0
430	34337	LQZT	10.1130/0-8137-1197-5.459	1510.0	76.0			1376.0	128.0	109.73837209302326	sandstone	sedimentary	353	10005	2524	Rich Butt Sandstone	591.9995	603.883	True	1510.0
431	35246	1103NC1	10.1130/B30848.1	1457.9	75.4	1463.0	52.8	1470.4	68.4	99.14989118607181	sandstone	sedimentary	1658	38206	9884	Keele Fm	656.25	666.875	True	1470.4
432	37261	09LR01	10.1130/L557.1	1740.0	34.0			1832.0	18.0	94.97816593886463	quartzite	metamorphic	325	8781	2219	Kinnikinic Quartzite	456.5	470.0	True	1832.0	Paleozoic*
433	29039	BCRA0110	10.1130/B30824.1	1118.4	66.0	1104.2	45.6	1076.2	42.8	103.92120423713064	sandstone	sedimentary	515	16012	4230	Amsden Fm	312.0	331.755	True	1076.2	Paleozoic*
434	35301	GV64	http://gsabulletin.gsapubs.org/content/114/12/1564.short	161.1	9.6						sandstone	sedimentary	259	6966	1765	Stony Creek Fm	141.5333	152.1	True	161.1
435	30877	TMS003	http://digitalscholarship.unlv.edu/thesesdissertations/1522/	1694.3	46.0	1686.1	26.6	1675.9	17.6	101.09791753684587	sandstone	sedimentary	468	14065	3728	Muddy Creek Fm	5.333	11.62	True	1675.9	Cenozoic
436	34899	25-325061	10.1130/GES00982.1	1725.0	85.2	1705.8	59.2	1682.3	81.6	102.5381917612792	sand	sedimentary	35	1731	221	Bouse Fm	4.0333	5.6518	True	1682.3	Cenozoic
437	45604	K065715	https://doi.org/10.1130/B31532.1	1734.0	50.0	1738.0	32.0	1743.0	22.4	99.48364888123925	sandstone	sedimentary	491	36852	9433	Carbon Butte Member	736.8	742.4	True	1743.0
438	28743	09ANJ34	10.1130/L131.1	153.4	6.6	151.5	20.0				sandstone	sedimentary	413	11096	2971	Valdez Gp	67.525	83.6	True	153.4
439	34720	C403752	10.1144/M35.37	528.0	10.0			517.0	68.0	102.12765957446808	sandstone	sedimentary	1538	35407	8914	Heiberg Fm	182.7	213.125	True	528.0
440	34718	C403730	10.1144/M35.37	1380.0	20.0			1389.0	18.0	99.35205183585313	sandstone	sedimentary	1534	35314	8899	Blind Fiord Fm	251.6755	251.902	True	1389.0	Mesozoic
441	34907	33-32606-1	10.1130/GES00982.1	1700.9	51.6	1718.0	33.0	1738.8	36.6	97.82033586381412	sandstone	sedimentary	468	14065	3728	Muddy Creek Fm	5.333	11.62	True	1738.8	Cenozoic
442	40700	11HW-23	10.2475/06.2015.02	423.1	31.4	421.9	29.2	415.2	78.8	101.90269749518303	sandstone	sedimentary	413	11097	2972	Orca Gp	53.95	64.9	True	423.1
443	42908	FCB-D2	http://ir.uiowa.edu/etd/3119	1438.0	30.4	1463.0	22.6	1498.0	32.6	95.99465954606141	sandstone	sedimentary	90	3423	691	Cherokee Gp	311.0	319.0	True	1438.0	Paleozoic*
444	34917	43-FC06-1	10.1130/GES00982.1	1495.4	56.0	1468.1	36.8	1428.7	42.0	104.6685798278155	sandstone	sedimentary	825	22959	6465	Diablo Fm of Palm Spring Gp	2.588	4.0333	True	1428.7	Cenozoic
445	42831	JL2	10.1139/E09-065	440.2	40.9	412.6	100.5	440.8	538.6	99.86388384754991	sandstone	sedimentary	1480	34196	8485	Jones Lake Fm	243.3	251.3	True	440.2
446	42888	C-100629	10.1139/E10-006	3505.0	164.0	3590.0	66.0	3638.0	44.0	96.34414513468938	sandstone	sedimentary	1535	35351	8902	Isachsen Fm	113.0	126.1	True	3638.0	Mesozoic
447	43167	BENYON-247	10.2110/jsr.2014.16	423.1	20.0	405.3	42.8	305.1	270.2	138.6758439855785	sandstone	sedimentary	1625	37218	9542	McMurray Fm	111.75	125.0	True	423.1
448	29154	XOM-MDB-43	10.1130/G35513.1	1193.4	22.2	1185.1	19.0	1170.0	35.8	102.0	sandstone	sedimentary	451	13078	3452	Wilcox Fm	49.85	56.8	True	1193.4	Cenozoic
449	29154	XOM-MDB-43	10.1130/G35513.1	1098.7	34.2	1089.5	27.0	1071.3	44.6	102.55764025016335	sandstone	sedimentary	451	13078	3452	Wilcox Fm	49.85	56.8	True	1098.7	Cenozoic
450	29112	XOM-AOS-20	10.1130/G35513.1	173.0	15.4	143.9	65.8				sandstone	sedimentary	1625	37221	9542	Grand Rapids Fm	108.0	109.25	True	173.0
451	37783	08-188	http://ir.uiowa.edu/etd/3496/	972.0	30.0	997.0	62.0	1053.0	186.0	92.3076923076923	greywacke	sedimentary	1558	35709	8994	Danish River Fm	427.4	438.5	True	972.0	Paleozoic*
452	28676	05SP14-20	10.1130/B30029.1	109.7	3.5	108.5	7.3	83.0	151.0	132.16867469879517	conglomerate	sedimentary	465	13948	3704	Sheep Pass Fm	34.875	46.175	True	109.7
453	28512	UT3	10.1130/G30684.1	1387.5	38.6	1409.1	27.8	1441.9	37.0	96.2272002219294	conglomerate	sedimentary	482	14737	3914	Indianola Gp	83.6	145.0	True	1441.9	Mesozoic
454	28695	B_Angel_3	10.1130/L121.1	1508.0	200.0	1584.0	120.0	1687.0	26.0	89.3894487255483	shale	sedimentary	491	15028	3997	Bright Angel Shale	498.925	506.75	True	1687.0	Cambrian
455	28716	BTC	10.1130/G31762.1	1826.6	32.9	1830.5	22.1	1835.0	28.8	99.54223433242507	conglomerate	sedimentary	1641	37797	9719	Cadomin Fm	122.0	126.1	True	1835.0	Mesozoic
456	42905	FCB-A2	http://ir.uiowa.edu/etd/3119	1391.0	50.8	1391.0	35.4	1392.0	44.8	99.92816091954023	sandstone	sedimentary	90	3423	691	Cherokee Gp	311.0	319.0	True	1392.0	Paleozoic*
457	34916	42-FC05-3	10.1130/GES00982.1	1964.2	48.6	2001.2	37.4	2039.6	56.2	96.30319670523632	sandstone	sedimentary	825	22963	6465	Mud Hills Mbr of Deguynos Fm	4.7553	5.0442	True	1964.2	Cenozoic
458	34916	42-FC05-3	10.1130/GES00982.1	1964.2	48.6	2001.2	37.4	2039.6	56.2	96.30319670523632	sandstone	sedimentary	825	22962	6465	Yuha Mbr of Deguynos Fm	4.2499	4.8998	True	1964.2	Cenozoic
459	34916	42-FC05-3	10.1130/GES00982.1	1964.2	48.6	2001.2	37.4	2039.6	56.2	96.30319670523632	sandstone	sedimentary	825	22961	6465	Camels Head Mbr of Deguynos Fm	4.0333	4.2499	True	1964.2	Cenozoic
460	34916	42-FC05-3	10.1130/GES00982.1	1964.2	48.6	2001.2	37.4	2039.6	56.2	96.30319670523632	sandstone	sedimentary	825	22960	6465	Jackson Fork Mbr of Deguynos Fm	3.8166	4.7553	True	1964.2	Cenozoic
461	28650	2DB273	10.1130/B30235.1	1052.8	68.0	1077.9	58.6	1129.0	108.0	93.25066430469442	sandstone	sedimentary	510	15822	4187	Indian Meadows Fm	53.95	56.0	True	1052.8	Cenozoic
462	28743	09ANJ34	10.1130/L131.1	139.1	2.2	148.6	77.2				sandstone	sedimentary	413	11096	2971	Valdez Gp	67.525	83.6	True	139.1
463	28874	07SD3a	10.1130/B30657.1	1285.0	50.0	1272.0	50.0	1249.0	108.0	102.88230584467574	sandstone	sedimentary	55	2029	313	Bliss Fm	483.475	493.575	True	1285.0	Cambrian
464	34916	42-FC05-3	10.1130/GES00982.1	1430.2	26.0	1429.2	24.6	1427.8	47.4	100.16809076901527	sandstone	sedimentary	825	22963	6465	Mud Hills Mbr of Deguynos Fm	4.7553	5.0442	True	1430.2	Cenozoic
465	34916	42-FC05-3	10.1130/GES00982.1	1430.2	26.0	1429.2	24.6	1427.8	47.4	100.16809076901527	sandstone	sedimentary	825	22962	6465	Yuha Mbr of Deguynos Fm	4.2499	4.8998	True	1430.2	Cenozoic
466	34916	42-FC05-3	10.1130/GES00982.1	1430.2	26.0	1429.2	24.6	1427.8	47.4	100.16809076901527	sandstone	sedimentary	825	22961	6465	Camels Head Mbr of Deguynos Fm	4.0333	4.2499	True	1430.2	Cenozoic
467	34916	42-FC05-3	10.1130/GES00982.1	1430.2	26.0	1429.2	24.6	1427.8	47.4	100.16809076901527	sandstone	sedimentary	825	22960	6465	Jackson Fork Mbr of Deguynos Fm	3.8166	4.7553	True	1430.2	Cenozoic
468	43170	12-LHCC01	10.2110/jsr.2014.33	1655.8	60.0	1652.4	46.8	1648.1	74.1	100.46720465991142	sandstone	sedimentary	491	15053	4003	Straight Cliffs Sandstone	87.175	95.55	True	1655.8	Mesozoic
469	45378	K03-Bass	10.1016/j.precamres.2017.03.006	1231.8	41.0	1247.9	33.0	1276.0	54.0	96.53605015673982	sandstone	sedimentary	491	36863	3996	Hotauta Conglomerate	1250.0	1254.0	True	1231.8
470	45378	K03-Bass	10.1016/j.precamres.2017.03.006	1231.8	41.0	1247.9	33.0	1276.0	54.0	96.53605015673982	sandstone	sedimentary	491	36862	3996	Bass Limestone	1244.0	1250.0	True	1231.8
471	45378	K03-Bass	10.1016/j.precamres.2017.03.006	1231.8	41.0	1247.9	33.0	1276.0	54.0	96.53605015673982	sandstone	sedimentary	491	36861	3996	Hakatai Shale	1180.0	1244.0	True	1231.8
472	45378	K03-Bass	10.1016/j.precamres.2017.03.006	1231.8	41.0	1247.9	33.0	1276.0	54.0	96.53605015673982	sandstone	sedimentary	491	36860	3996	Shinumo Quartzite	1140.0	1180.0	True	1231.8
473	45378	K03-Bass	10.1016/j.precamres.2017.03.006	1231.8	41.0	1247.9	33.0	1276.0	54.0	96.53605015673982	sandstone	sedimentary	491	36859	3996	Dox Sandstone	1108.0	1140.0	True	1231.8
474	45378	K03-Bass	10.1016/j.precamres.2017.03.006	1231.8	41.0	1247.9	33.0	1276.0	54.0	96.53605015673982	sandstone	sedimentary	491	36858	3996	Cardenas lavas	1100.0	1108.0	True	1231.8
475	35341	08LT02	10.1080/00206814.2013.844313	1064.9	71.4	1096.3	57.8	1159.2	91.8	91.86507936507937	sandstone	sedimentary	1421	33271	7753	Las Trancas Fm	150.325	156.0	True	1064.9	Mesozoic
476	35722	NR9	10.1016/j.precamres.2012.02.017	1472.4	26.6			1418.0	86.0	103.83638928067701	sandstone	sedimentary	466	13993	3712	Stirling Quartzite	867.5065	1193.9935	True	1472.4
477	42912	IB-D1	http://ir.uiowa.edu/etd/3119	433.0	13.2	431.0	16.0	420.0	73.2	103.0952380952381	sandstone	sedimentary	432	13132	3464	Bernadotte Sandstone Mbr	312.9333	313.8813	True	433.0
478	34569	UEC	10.1130/B26399.1	149.8	5.2						greywacke	sedimentary	243	6852	1738	Franciscan Subduction Complex	59.2	153.4	True	149.8
479	42086	C	10.1016/S0037-0738(03)00158-1	584.0	27.0	588.0	37.0	604.0	75.0	96.6887417218543	sandstone	sedimentary	483	14781	3928	Glen Canyon Gp	170.3	201.3	True	584.0	Mesozoic
480	35328	Tyee	10.1130/G33746.1	50.0	6.0						sandstone	sedimentary	266	7121	1825	Tyee Fm	45.6334	46.7166	True	50.0
481	30310	GVG09-15	10.1130/B31065.1	110.7	5.4	98.7	22.6				sandstone	sedimentary	252	6880	1748	Deer Valley Fm	66.0	67.525	True	110.7
482	43174	12-LHCC06	10.2110/jsr.2014.33	228.0	9.6	220.0	44.0	135.4	514.6	168.38995568685377	sandstone	sedimentary	491	15053	4003	Straight Cliffs Sandstone	87.175	95.55	True	228.0
483	29093	CS12-1	10.1130/B30884.1	1890.0	59.0	1895.0	38.0	1902.0	24.0	99.36908517350157	sandstone	sedimentary	54	1940	302	Lanoria Quartzite	1034.0	1101.0	True	1902.0
484	35111	JL18B	10.1144/0016-76492008-088	640.4	24.6	664.1	34.8	745.0	39.4	85.95973154362416	siltstone	sedimentary	589	18452	4758	Random	541.0	562.939	True	640.4	Cambrian
485	37468	OK-1	10.1130/GES01316.1	1161.3	11.7	1167.4	17.6	1178.7	45.1	98.52379740391957	sandstone	sedimentary	158	5568	1306	Pontotoc Gp	282.0	300.1	True	1161.3	Paleozoic*
486	43186	TRU	10.2110/jsr.2008.088	1125.1	22.0	1149.2	48.2	1195.0	14.0	94.15062761506276	sandstone	sedimentary	71	2538	461	Trujillo Fm	227.0	237.0	True	1195.0	Mesozoic
487	35696	Samp_02	10.1016/j.sedgeo.2005.07.014	424.9	7.0	464.6	51.0	665.9	92.4	63.80837963658207	sandstone	sedimentary	301	7799	2027	Pottsville Gp	312.0	319.0	True	424.9
488	42905	FCB-A2	http://ir.uiowa.edu/etd/3119	1197.0	49.8	1186.0	39.8	1165.0	67.4	102.74678111587983	sandstone	sedimentary	90	3423	691	Cherokee Gp	311.0	319.0	True	1197.0	Paleozoic*
489	43165	BENYON-250	10.2110/jsr.2014.16	535.3	34.0	548.2	40.8	602.4	151.0	88.86122177954847	sandstone	sedimentary	1625	37218	9542	McMurray Fm	111.75	125.0	True	535.3
490	40673	LL4	10.1306/10191515029	1356.8	33.0	1363.1	27.2	1372.9	46.6	98.82729987617452	sandstone	sedimentary	1625	37218	9542	McMurray Fm	111.75	125.0	True	1356.8	Mesozoic
491	28976	Prospect-Creek	10.1130/B30671.1	1825.8	80.8	1843.9	60.6	1864.4	90.2	97.92962883501394	sandstone	sedimentary	1632	37455	9596	Nikanassin Fm	143.7	153.4	True	1825.8	Mesozoic
492	43203	CP48	10.2110/jsr.2008.088	253.8	9.4	258.9	15.4	305.0	127.3	83.21311475409836	sandstone	sedimentary	490	15003	3990	Chinle Fm	201.3	232.0	True	253.8
493	42911	IB-M1	http://ir.uiowa.edu/etd/3119	417.0	11.0	415.0	17.6	402.0	98.4	103.73134328358209	sandstone	sedimentary	83	3118	629	Caseyville Fm	319.0	320.05	True	417.0
494	30331	SG-40	10.1130/B31065.1	167.3	8.6	219.0	100.0				sandstone	sedimentary	570	18076	4646	San Emigdio Shale and Tejon Fm	36.825	47.8	True	167.3
495	29053	EB0110	10.1130/B30824.1	1547.1	149.0	1620.8	88.4	1717.8	24.8	90.06287111421585	sandstone	sedimentary	515	16008	4229	Mesaverde Fm	80.725	90.825	True	1717.8	Mesozoic
496	28687	3-25-04-78	10.1130/B30206.1	184.4	5.8	171.8	58.4	1.7	892.0	10847.058823529413	sandstone	sedimentary	35	2899	528	McCoy Mountains Fm	116.0	168.8	True	184.4
497	35261	33EAB10	10.1130/B30860.1	1748.9	78.6	1824.6	110.6	1912.2	215.6	91.46009831607573	diamictite	sedimentary	477	14498	3843	Perry Canyon Fm	663.3331	668.0557	True	1748.9
498	29940	CG11-6	10.1130/GES00917.1	1154.0	22.0	1160.0	15.0	1162.6	44.8	99.26027868570445	sandstone	sedimentary	523	16616	4300	Cockfield Fm	37.8	38.675	True	1154.0	Cenozoic
499	29178	XOM-MDB-68	10.1130/G35513.1	1736.3	32.6	1734.5	18.0	1732.3	5.8	100.2309068867979	sand	sedimentary	159	5588	1310	Strawn Gp	306.0	312.0	True	1732.3	Paleozoic*
500	35713	K03DV04	10.1016/j.precamres.2014.06.005	1429.1	37.6	1561.7	29.2	1745.9	40.4	81.85463084941864	arkose	sedimentary	464	13875	3691	Crystal Spring Fm	686.0	703.0	False	1429.1
501	28976	Prospect-Creek	10.1130/B30671.1	433.8	31.8	439.1	55.6	467.3	301.6	92.83115771453028	sandstone	sedimentary	1632	37455	9596	Nikanassin Fm	143.7	153.4	True	433.8
502	37269	5TA09	10.1130/L557.1	2043.0	55.0	2063.0	29.0	2084.0	20.0	98.03262955854127	quartzite	metamorphic	325	8781	2219	Kinnikinic Quartzite	456.5	470.0	True	2084.0	Paleozoic*
503	42884	C-82218	10.1139/E10-006	2651.0	94.0	2679.0	44.0	2699.0	32.0	98.2215635420526	sandstone	sedimentary	1544	35525	8947	Isachsen Fm	116.0	126.1	True	2699.0	Mesozoic
504	29129	XOM-MDB-14	10.1130/G35513.1	1089.7	30.8	1092.1	23.6	1096.8	34.4	99.35266229029905	sandstone	sedimentary	527	16912	4331	Nanafalia Fm	56.8	58.1333	True	1089.7	Cenozoic
505	29129	XOM-MDB-14	10.1130/G35513.1	1089.7	30.8	1092.1	23.6	1096.8	34.4	99.35266229029905	sandstone	sedimentary	527	16911	4331	Tuscahoma Fm	54.975	56.8	True	1089.7	Cenozoic
506	29129	XOM-MDB-14	10.1130/G35513.1	1089.7	30.8	1092.1	23.6	1096.8	34.4	99.35266229029905	sandstone	sedimentary	527	16910	4331	Bashi Fm	53.95	54.975	True	1089.7	Cenozoic
507	29129	XOM-MDB-14	10.1130/G35513.1	1089.7	30.8	1092.1	23.6	1096.8	34.4	99.35266229029905	sandstone	sedimentary	527	16909	4331	Hatchetigbee Fm	52.925	53.95	True	1089.7	Cenozoic
508	29941	CG11-7	10.1130/GES00917.1	1087.0	82.0	1112.0	55.0	1189.6	131.3	91.3752521856086	sandstone	sedimentary	523	16618	4300	Sparta Fm	40.1333	40.7167	True	1087.0	Cenozoic
509	28832	07-LG-14	10.1130/B30530.1	1014.0	34.0	1024.0	34.0	1048.0	22.0	96.7557251908397	sandstone	sedimentary	1653	38100	9839	Saline River Fm	501.0	503.5	True	1048.0	Cambrian
510	37466	Teh-TH	10.1130/GES01313.1	1350.1	92.3	1373.5	71.0	1410.0	105.8	95.7517730496454	sandstone	sedimentary	520	16415	4285	Wilcox Fm	49.85	53.2667	True	1350.1	Cenozoic
511	28649	2DB257	10.1130/B30235.1	1430.8	58.0	1456.7	41.0	1494.6	52.0	95.73129934430617	sandstone	sedimentary	486	16049	4243	Wind River Fm	47.8	53.95	True	1494.6	Cenozoic
512	38244	EI2-116	10.1111/ter.12207	2774.0	45.0	2734.0	21.0	2705.0	16.0	102.55083179297597	sandstone	sedimentary	1509	34836	8759	Nauyat	1266.0	1276.0	True	2705.0
513	28755	33516	10.1130/B30503.1	1073.3	21.2	1070.0	18.1	1063.5	23.8	100.92148566055477	sandstone	sedimentary	1546	35581	8957	Danish River Fm	412.9	419.2	True	1073.3	Paleozoic*
514	34004	TB1-TB2	10.1130/L451.1	207.9	9.4	214.0	108.0	283.0	1292.0	73.46289752650176	sandstone	sedimentary	1454	33654	8226	Tantalus	126.1	150.325	True	207.9
515	42911	IB-M1	http://ir.uiowa.edu/etd/3119	2674.0	42.4	2713.0	23.0	2742.0	24.0	97.5200583515682	sandstone	sedimentary	83	3118	629	Caseyville Fm	319.0	320.05	True	2742.0	Paleozoic*
516	29940	CG11-6	10.1130/GES00917.1	1075.0	13.0	1067.2	9.6	1059.9	42.4	101.42466270402868	sandstone	sedimentary	523	16616	4300	Cockfield Fm	37.8	38.675	True	1075.0	Cenozoic
517	30318	GVG09-8	10.1130/B31065.1	123.8	16.2	121.7	40.8	81.7	789.0	151.52998776009792	sandstone	sedimentary	256	6918	1756	Ione Fm	46.175	47.8	True	123.8
518	28641	OS0884	10.1130/G31335.1	2471.3	77.2	2477.1	35.2	2481.9	7.2	99.57290785285467	metasedimentary	metamorphic	491	15025	3995	Vishnu Schist	1690.0	1887.5	True	2481.9
519	28692	06GC156	10.1130/L121.1	1528.0	60.0	1563.0	38.0	1611.0	38.0	94.84792054624457	sandstone	sedimentary	491	15037	4000	Supai Fm	282.0	313.75	True	1611.0	Paleozoic*
520	28832	07-LG-14	10.1130/B30530.1	1398.0	54.0	1576.0	66.0	1780.0	35.0	78.53932584269663	sandstone	sedimentary	1653	38100	9839	Saline River Fm	501.0	503.5	False	1780.0
521	28673	05DW1	10.1130/B30029.1	1816.4	18.0	1838.0	13.3	1862.4	19.3	97.53006872852234	conglomerate	sedimentary	463	13841	3677	Sheep Pass Fm In Fish Creek Range	37.8	46.175	True	1816.4	Cenozoic
522	45604	K065715	https://doi.org/10.1130/B31532.1	965.0	18.0	972.0	26.0	987.0	33.8	97.77102330293819	sandstone	sedimentary	491	36852	9433	Carbon Butte Member	736.8	742.4	True	965.0
523	35260	25EAB10	10.1130/B30860.1	1370.4	129.2	1411.5	80.8	1474.2	30.6	92.95889295889296	quartzite	metamorphic	477	14498	3843	Perry Canyon Fm	663.3331	668.0557	True	1474.2
524	43161	BENYON-356	10.2110/jsr.2014.16	1887.5	25.0	1900.0	21.2	1913.6	34.6	98.63607859531773	sandstone	sedimentary	1625	37218	9542	McMurray Fm	111.75	125.0	True	1887.5	Mesozoic
525	34500	7812	10.1130/B25989.1	2669.0	60.0			2688.0	24.0	99.29315476190476	sandstone	sedimentary	757	22001	6028	Dunvegan	1326.25	1351.0	True	2688.0
526	28971	Basal-Kootenay	10.1130/B30671.1	1523.9	42.4	1557.7	26.4	1603.9	20.8	95.01215786520356	sandstone	sedimentary	1641	37796	9718	Elk Fm	134.625	141.1	True	1603.9	Mesozoic
527	28971	Basal-Kootenay	10.1130/B30671.1	1523.9	42.4	1557.7	26.4	1603.9	20.8	95.01215786520356	sandstone	sedimentary	1641	37795	9718	Mist Mountain Fm	141.1	146.1834	True	1603.9	Mesozoic
528	28971	Basal-Kootenay	10.1130/B30671.1	1523.9	42.4	1557.7	26.4	1603.9	20.8	95.01215786520356	sandstone	sedimentary	1641	37794	9718	Morrissey Fm	146.1834	147.3666	True	1603.9	Mesozoic
529	42908	FCB-D2	http://ir.uiowa.edu/etd/3119	1045.0	36.2	1052.0	42.8	1068.0	107.6	97.84644194756554	sandstone	sedimentary	90	3423	691	Cherokee Gp	311.0	319.0	True	1045.0	Paleozoic*
530	35722	NR9	10.1016/j.precamres.2012.02.017	2468.9	36.8			2617.0	22.0	94.34084829957968	sandstone	sedimentary	466	13993	3712	Stirling Quartzite	867.5065	1193.9935	True	2617.0
531	42831	JL2	10.1139/E09-065	1080.2	18.3	1088.9	42.7	1114.8	76.6	96.89630426982418	sandstone	sedimentary	1480	34196	8485	Jones Lake Fm	243.3	251.3	True	1080.2	Mesozoic
532	35252	13EAB10	10.1130/B30860.1	2442.2	135.2	2505.9	61.8	2557.9	4.8	95.47675827827514	diamictite	sedimentary	477	14498	3843	Perry Canyon Fm	663.3331	668.0557	True	2557.9
533	35712	K03DV03	10.1016/j.precamres.2014.06.005	1726.2	28.0	1739.1	22.6	1754.7	36.6	98.37579073345871	conglomerate	sedimentary	464	13875	3691	Crystal Spring Fm	686.0	703.0	True	1726.2
534	35719	J14A	10.1016/j.precamres.2012.02.017	1204.3	22.4			1289.0	74.0	93.42901474010861	sandstone	sedimentary	467	14028	3718	Johnnie Fm	564.5	576.25	True	1204.3
535	42831	JL2	10.1139/E09-065	1906.2	31.3	1919.9	59.4	1925.6	62.6	98.99252181138347	sandstone	sedimentary	1480	34196	8485	Jones Lake Fm	243.3	251.3	True	1906.2	Mesozoic
536	29061	GBS0108	10.1130/B30824.1	1091.3	21.6	1116.7	17.8	1166.5	30.0	93.5533647663952	sandstone	sedimentary	515	15992	4229	Cloverly Fm	130.275	145.0	True	1091.3	Mesozoic
537	28693	B_Angel_1	10.1130/L121.1	1251.0	58.0	1252.0	40.0	1253.0	44.0	99.84038308060654	shale	sedimentary	491	15028	3997	Bright Angel Shale	498.925	506.75	True	1253.0	Cambrian
538	29173	XOM-MDB-63	10.1130/G35513.1	169.1	6.4	166.0	13.4	121.3	185.2	139.40643033800495	sandstone	sedimentary	519	16306	4277	Frio Fm	22.3825	31.0	True	169.1
539	29180	XOM-MDB-70	10.1130/G35513.1	1707.9	42.0	1703.9	24.6	1699.0	19.0	100.52383755150088	sandstone	sedimentary	520	16415	4285	Wilcox Fm	49.85	53.2667	True	1699.0	Cenozoic
540	34410	Rome1	10.1130/G20727.1	2232.0	380.0	2519.0	1194.0	2758.0	16.0	80.92820884699057	sandstone	sedimentary	7	115	39	Rome Fm	511.0	514.75	True	2758.0	Cambrian
541	37267	5PL13	10.1130/L557.1	1663.0	20.0	1645.0	13.0	1623.0	14.0	102.46457178065312	sandstone	sedimentary	325	8774	2216	Jefferson Fm	366.8	386.45	True	1623.0	Paleozoic*
542	34496	7808	10.1130/B25989.1	1956.0	42.0			2026.0	72.0	96.54491609081934	sandstone	sedimentary	757	22001	6028	Dunvegan	1326.25	1351.0	True	1956.0
543	33950	12MP57	10.1130/L475.1	605.3	13.8	592.7	13.1	544.5	36.4	111.16620752984389	conglomerate	sedimentary	425	11187	3018	Descon Fm	407.6	470.0	True	605.3	Paleozoic*
544	28511	UT1	10.1130/G30684.1	583.9	17.4	607.0	42.6	694.3	187.6	84.09909261126315	sandstone	sedimentary	479	14623	3884	Navajo Sandstone	170.3	201.3	True	583.9	Mesozoic
545	40702	11HW-33	10.2475/06.2015.02	81.6	2.0	82.9	8.8	120.4	252.0	67.77408637873754	sandstone	sedimentary	413	11097	2972	Orca Gp	53.95	64.9	True	81.6
546	29139	XOM-MDB-26	10.1130/G35513.1	1134.1	64.2	1135.4	43.0	1137.9	22.6	99.6660514983742	sandstone	sedimentary	527	16912	4331	Nanafalia Fm	56.8	58.1333	True	1137.9	Cenozoic
547	29139	XOM-MDB-26	10.1130/G35513.1	1134.1	64.2	1135.4	43.0	1137.9	22.6	99.6660514983742	sandstone	sedimentary	527	16911	4331	Tuscahoma Fm	54.975	56.8	True	1137.9	Cenozoic
548	29139	XOM-MDB-26	10.1130/G35513.1	1134.1	64.2	1135.4	43.0	1137.9	22.6	99.6660514983742	sandstone	sedimentary	527	16910	4331	Bashi Fm	53.95	54.975	True	1137.9	Cenozoic
549	29139	XOM-MDB-26	10.1130/G35513.1	1134.1	64.2	1135.4	43.0	1137.9	22.6	99.6660514983742	sandstone	sedimentary	527	16909	4331	Hatchetigbee Fm	52.925	53.95	True	1137.9	Cenozoic
550	40704	TI10-01	10.2475/06.2015.02	106.7	5.4	105.3	18.0	73.6	410.2	144.97282608695653	sandstone	sedimentary	413	11097	2972	Orca Gp	53.95	64.9	True	106.7
551	28716	BTC	10.1130/G31762.1	1012.8	7.6	1020.0	11.7	1035.4	32.7	97.81726868842959	conglomerate	sedimentary	1641	37797	9719	Cadomin Fm	122.0	126.1	True	1012.8	Mesozoic
552	30340	Santiago	10.1130/B31065.1	156.4	4.8	154.2	6.0	120.6	67.2	129.6849087893864	sandstone	sedimentary	208	6392	1543	Santiago Fm	32.45	47.8	True	156.4
553	29321	12WI2	10.1130/B31142.1	1751.9	121.2	1759.2	66.2	1767.8	6.8	99.1005769883471	quartzite	metamorphic	459	13629	3603	Harkless Fm	516.1	526.15	True	1767.8	Cambrian
554	29201	51205	10.1130/B30999.1	96.5	3.5	97.3	14.5	118.3	357.5	81.57227387996619	sandstone	sedimentary	507	15705	4162	Adaville Fm	90.825	92.875	True	96.5
555	34752	94CL53	10.1029/2005TC001830	224.0	7.0	197.0	49.0				sandstone	sedimentary	155	5367	1272	Otuk Fm	168.8	247.2	True	224.0
556	40695	RB12-02	10.2475/06.2015.02	88.9	11.4	85.7	108.4				sandstone	sedimentary	413	11097	2972	Orca Gp	53.95	64.9	True	88.9
557	35112	JL19A	10.1144/0016-76492008-088	642.3	12.2	647.9	17.4	621.7	33.2	103.31349525494612	conglomerate	sedimentary	589	18453	4758	Crown Hill	562.939	583.333	True	642.3
558	35720	J39A	10.1016/j.precamres.2012.02.017	955.9	22.0			1061.0	80.0	90.0942507068803	sandstone	sedimentary	467	14028	3718	Johnnie Fm	564.5	576.25	True	955.9
559	29051	DK0108	10.1130/B30824.1	116.2	8.6	118.8	9.2	171.1	79.2	67.9135008766803	sandstone	sedimentary	515	15992	4229	Cloverly Fm	130.275	145.0	True	116.2
560	43195	CP18	10.2110/jsr.2008.088	1165.8	87.0	1200.7	64.8	1264.0	82.0	92.23101265822785	sandstone	sedimentary	490	15003	3990	Chinle Fm	201.3	232.0	True	1264.0	Mesozoic
561	34161	Parry8	10.1139/e2012-067	437.8	18.0	426.5	13.6	497.6	48.4	87.98231511254019	sandstone	sedimentary	1502	34763	8718	Parry Islands Fm	368.875	374.825	True	437.8
562	29214	Sam-17	10.1130/B30999.1	1363.4	31.2	1370.3	49.8	1381.2	117.6	98.71126556617435	sandstone	sedimentary	501	15433	4094	Mesaverde Gp	66.0	74.975	True	1363.4	Mesozoic
563	43161	BENYON-356	10.2110/jsr.2014.16	2348.5	181.4	2373.6	91.0	2395.2	62.4	98.0502672010688	sandstone	sedimentary	1625	37218	9542	McMurray Fm	111.75	125.0	True	2395.2	Mesozoic
564	29177	XOM-MDB-67	10.1130/G35513.1	1700.2	31.4	1702.8	18.2	1706.0	12.2	99.66002344665885	sandstone	sedimentary	520	16415	4285	Wilcox Fm	49.85	53.2667	True	1706.0	Cenozoic
565	42913	IB-D2	http://ir.uiowa.edu/etd/3119	1090.0	25.2	1101.0	25.2	1123.0	55.8	97.06144256455921	sandstone	sedimentary	432	13132	3464	Bernadotte Sandstone Mbr	312.9333	313.8813	True	1090.0	Paleozoic*
566	45595	K1252NAN2	https://doi.org/10.1130/B31532.1	2031.0	82.0	2018.0	44.0	2004.0	30.8	101.34730538922156	sandstone	sedimentary	491	36857	9434	Nankoweap Fm	767.6	770.4	True	2004.0
567	42908	FCB-D2	http://ir.uiowa.edu/etd/3119	1059.0	22.2	1077.0	18.6	1113.0	32.2	95.14824797843666	sandstone	sedimentary	90	3423	691	Cherokee Gp	311.0	319.0	True	1059.0	Paleozoic*
568	28695	B_Angel_3	10.1130/L121.1	1677.0	128.0	1684.0	72.0	1692.0	20.0	99.11347517730496	shale	sedimentary	491	15028	3997	Bright Angel Shale	498.925	506.75	True	1692.0	Cambrian
569	42906	FCB-AD	http://ir.uiowa.edu/etd/3119	1125.0	61.0	1146.0	44.4	1187.0	51.2	94.77674810446504	sandstone	sedimentary	90	3423	691	Cherokee Gp	311.0	319.0	True	1187.0	Paleozoic*
570	42884	C-82218	10.1139/E10-006	1007.0	24.0	1013.0	18.0	1025.0	22.0	98.2439024390244	sandstone	sedimentary	1544	35525	8947	Isachsen Fm	116.0	126.1	True	1025.0	Mesozoic
571	42911	IB-M1	http://ir.uiowa.edu/etd/3119	1493.0	46.4	1522.0	40.2	1561.0	70.2	95.64381806534273	sandstone	sedimentary	83	3118	629	Caseyville Fm	319.0	320.05	True	1493.0	Paleozoic*
572	30339	Tourmaline	10.1130/B31065.1	144.4	5.2	140.6	13.6	76.3	231.0	189.25294888597642	sandstone	sedimentary	215	6479	1571	Scripps Fm	42.925	43.7375	True	144.4
573	43171	12-PC04	10.2110/jsr.2014.33	378.6	7.6	380.2	20.9	389.8	140.4	97.12673165726014	sandstone	sedimentary	491	15053	4003	Straight Cliffs Sandstone	87.175	95.55	True	378.6
574	43132	CUT04-XII-133	10.1016/j.palaeo.2008.03.050	1428.1	2.5	1430.8	2.7	1434.9	4.8	99.52609937974772	siltstone	sedimentary	494	15139	4020	Cutler Fm	269.4875	298.9	True	1428.1	Paleozoic*
575	34717	C403685	10.1144/M35.37	1509.0	30.0			1446.0	58.0	104.35684647302905	sandstone	sedimentary	1533	35311	8894	Deer Bay Fm	134.625	152.1	True	1509.0	Mesozoic
576	29050	DB0110	10.1130/B30824.1	93.7	6.6	92.3	17.2	56.1	433.2	167.02317290552585	sandstone	sedimentary	515	15990	4229	Frontier Fm	95.022	100.5	True	93.7
577	28735	7015	10.1130/B30260.1	160.4	11.0			220.3	39.4	72.80980481162052	sandstone	sedimentary	290	7498	1979	Lonesome Fm	163.5	164.15	True	160.4
578	28725	TFI	10.1130/G31762.1	1935.5	54.2	1928.6	28.4	1921.2	10.1	100.74432646262753	conglomerate	sedimentary	487	16118	4252	Kootenai Fm	128.3	145.0	True	1921.2	Mesozoic
579	28884	11LHM03	10.1130/B30657.1	1090.0	14.0	1085.0	14.0	1077.0	34.0	101.20705663881151	sandstone	sedimentary	50	1828	254	Bliss Fm	483.475	493.575	True	1090.0	Cambrian
580	34178	05KP42	http://www.carleton.edu/departments/geol/Resources/comps/CompsPDFfiles/2006CompsPapers/Lundquist2006.pdf	2711.1	32.4	2698.6	53.9	2720.4	21.3	99.65813850904279	quartzite	metamorphic	192	6172	1477	Palms Fm	1937.5	2162.5	True	2720.4
581	37272	9TD10	10.1130/L557.1	1757.0	31.0	1825.0	18.0	1903.0	8.0	92.32790331056226	quartzite	metamorphic	325	8781	2219	Kinnikinic Quartzite	456.5	470.0	False	1903.0
582	45594	K1252NAN1	https://doi.org/10.1130/B31532.1	1072.0	32.0	1077.0	32.0	1087.0	41.6	98.62005519779208	sandstone	sedimentary	491	36857	9434	Nankoweap Fm	767.6	770.4	True	1072.0
583	37780	08-208	http://ir.uiowa.edu/etd/3496/	1019.0	64.0	1039.0	56.0	1082.0	104.0	94.17744916820702	sandstone	sedimentary	1571	35874	9069	Cranstone Fm	438.5	443.8	True	1019.0	Paleozoic*
584	37465	STQ	10.1130/GES01313.1	2816.5	156.0	3055.1	68.2	3216.2	38.4	87.57229028045519	sandstone	sedimentary	520	16418	4285	Simsboro Sand Mbr	56.0	56.8	False	3216.2
585	29186	XOM-MDB-76	10.1130/G35513.1	1009.3	46.8	1012.1	33.0	1018.0	25.6	99.14538310412574	sandstone	sedimentary	165	5752	1344	Wilcox Gp	41.3	56.0	True	1018.0	Cenozoic
586	42909	FCB-D3	http://ir.uiowa.edu/etd/3119	2413.0	70.0	2525.0	36.8	2617.0	31.4	92.20481467329003	sandstone	sedimentary	80	2986	581	Cherokee Gp	310.5	317.25	False	2617.0
587	28503	CP3	10.1130/G30684.1	1745.8	138.4	1824.0	84.0	1824.0	84.0	95.71271929824562	sandstone	sedimentary	479	14623	3884	Navajo Sandstone	170.3	201.3	True	1824.0	Mesozoic
588	37470	OK-4	10.1130/GES01316.1	546.2	4.9	533.3	16.3	478.6	84.2	114.1245298788132	sandstone	sedimentary	158	5567	1306	Wellington Fm	279.7375	282.0	True	546.2	Paleozoic*
589	33950	12MP57	10.1130/L475.1	611.8	24.3	607.4	21.3	590.9	45.2	103.53697749196141	conglomerate	sedimentary	425	11187	3018	Descon Fm	407.6	470.0	True	611.8	Paleozoic*
590	28866	PG208	http://specialpapers.gsapubs.org/content/487/63.abstract	1754.0	27.3	1782.2	19.8	1814.4	28.2	96.6710758377425	sandstone	sedimentary	332	9034	2282	Renova Fm	23.03	38.675	True	1754.0	Cenozoic
591	37455	B1	10.1130/GES01313.1	287.2	23.4	288.8	6.7	274.3	207.3	104.7028800583303	sandstone	sedimentary	519	16318	4277	Carrizo Fm	49.85	51.9	True	287.2
592	43202	CP47	10.2110/jsr.2008.088	1489.7	44.2	1479.2	41.2	1464.2	78.3	101.74156535992351	sandstone	sedimentary	490	15003	3990	Chinle Fm	201.3	232.0	True	1489.7	Mesozoic
593	43614	10087	10.1130/B30843.1	1454.0	28.0			1479.0	20.0	98.30966869506423	sandstone	sedimentary	1572	35879	9073	Lorimer Ridge Fm	444.0333	444.2667	True	1479.0	Paleozoic*
594	37782	08-164	http://ir.uiowa.edu/etd/3496/	1228.0	100.0	1232.0	66.0	1241.0	56.0	98.95245769540693	greywacke	sedimentary	1560	35737	9001	Danish River Fm	427.4	438.5	True	1241.0	Paleozoic*
595	28634	K06246	10.1130/G31335.1	1733.0	74.8	1739.3	51.4	1746.8	68.2	99.20998397068927	metasedimentary	metamorphic	484	14829	3938	Vishnu Schist	1690.0	1887.5	True	1746.8
596	40662	KE4	10.1306/10191515029	1083.2	37.2	1088.7	40.8	1099.7	97.0	98.49959079749023	sandstone	sedimentary	1625	37218	9542	McMurray Fm	111.75	125.0	True	1083.2	Mesozoic
597	35260	25EAB10	10.1130/B30860.1	1116.4	74.6	1134.4	52.6	1168.9	50.2	95.50859782701686	quartzite	metamorphic	477	14498	3843	Perry Canyon Fm	663.3331	668.0557	True	1168.9
598	43618	10094	10.1130/B30843.1	1640.0	42.0			1635.0	26.0	100.30581039755351	sandstone	sedimentary	1560	35737	9001	Danish River Fm	427.4	438.5	True	1635.0	Paleozoic*
599	34411	Rome2	10.1130/G20727.1	1799.0	22.0	1781.0	220.0	1760.0	42.0	102.2159090909091	sandstone	sedimentary	8	136	46	Rome Fm	511.0	514.75	True	1799.0	Cambrian
600	28881	09SL2	10.1130/B30657.1	1276.0	52.0	1260.0	52.0	1231.0	108.0	103.65556458164095	sandstone	sedimentary	52	1873	281	Bliss Fm	483.475	493.575	True	1276.0	Cambrian
601	28641	OS0884	10.1130/G31335.1	1750.5	53.4	1764.6	29.6	1781.2	10.4	98.27644284751852	metasedimentary	metamorphic	491	15025	3995	Vishnu Schist	1690.0	1887.5	True	1781.2
602	43191	CP6	10.2110/jsr.2008.088	1090.1	80.2	1096.9	54.0	1110.0	14.0	98.2072072072072	sandstone	sedimentary	488	14921	3971	Santa Rosa Sandstone	229.5	237.0	True	1110.0	Mesozoic
603	33302	Mol9-7	http://www.scielo.org.mx/pdf/rmcg/v31n3/v31n3a8.pdf	1166.2	47.4	1179.7	36.4	1204.6	54.0	96.81221982400797	paragneiss	metamorphic	1419	33215	7745	Huiznopala Fm	1000.0	1200.0	True	1166.2
604	34005	TB3	10.1130/L451.1	191.0	14.2	170.0	68.0				conglomerate	sedimentary	1454	33654	8226	Tantalus	126.1	150.325	True	191.0
605	42908	FCB-D2	http://ir.uiowa.edu/etd/3119	1238.0	31.6	1276.0	24.4	1341.0	36.0	92.31916480238628	sandstone	sedimentary	90	3423	691	Cherokee Gp	311.0	319.0	True	1238.0	Paleozoic*
606	29117	XOM-MDB-02	10.1130/G35513.1	1125.3	29.4	1129.1	36.0	1136.4	88.4	99.02323125659979	sandstone	sedimentary	526	16848	4323	Lower Frio Mbr	26.8325	27.4663	True	1125.3	Cenozoic
607	29117	XOM-MDB-02	10.1130/G35513.1	1125.3	29.4	1129.1	36.0	1136.4	88.4	99.02323125659979	sandstone	sedimentary	526	16847	4323	Middle Frio Mbr	24.9313	26.8325	True	1125.3	Cenozoic
608	29117	XOM-MDB-02	10.1130/G35513.1	1125.3	29.4	1129.1	36.0	1136.4	88.4	99.02323125659979	sandstone	sedimentary	526	16846	4323	Upper Frio Mbr	24.2975	24.9313	True	1125.3	Cenozoic
609	29111	XOM-AOS-18	10.1130/G35513.1	120.5	7.6	128.3	77.4	275.5	1495.4	43.738656987295826	sandstone	sedimentary	1625	37219	9542	Clearwater Fm	110.5	111.75	True	120.5
610	28577	T3	10.1130/B30120.1	1943.6	29.7	1834.0	51.3	1782.9	56.1	109.01340512647933	sandstone	sedimentary	1657	38191	9877	Imperial Fm	362.225	382.7	False	1943.6
611	35251	11EAB10	10.1130/B30860.1	1741.9	35.8	1758.8	42.6	1778.9	82.6	97.92006296025635	slate	metamorphic	477	14498	3843	Perry Canyon Fm	663.3331	668.0557	True	1741.9
612	29063	HB0110	10.1130/B30824.1	2411.3	100.4	2491.9	46.8	2558.2	13.4	94.25768118208116	sandstone	sedimentary	515	16004	4229	Goose Egg Fm	278.9834	280.4916	True	2558.2	Paleozoic*
613	43194	CP17	10.2110/jsr.2008.088	624.2	62.4	666.3	89.4	811.0	314.0	76.96670776818742	sandstone	sedimentary	495	15195	4029	Chinle Fm	206.7	237.0	True	624.2	Mesozoic
614	28702	Lower_Hermit	10.1130/L121.1	1628.0	92.0	1655.0	74.0	1688.0	120.0	96.44549763033176	sandstone	sedimentary	491	15036	4000	Hermit Shale	279.7375	282.0	True	1628.0	Paleozoic*
615	34494	6952	10.1130/B25989.1	2565.0	54.0			2592.0	24.0	98.95833333333333	sandstone	sedimentary	757	22001	6028	Dunvegan	1326.25	1351.0	True	2592.0
616	29213	07.28.11	10.1130/B30999.1	92.9	8.2	89.5	17.2	2.0	434.8	4645.0	sandstone	sedimentary	507	15705	4162	Adaville Fm	90.825	92.875	True	92.9
617	28654	4DB4	10.1130/B30235.1	1375.6	41.4	1390.6	53.0	1413.6	118.0	97.31182795698925	sandstone	sedimentary	510	15822	4187	Indian Meadows Fm	53.95	56.0	True	1375.6	Cenozoic
618	28716	BTC	10.1130/G31762.1	1845.1	39.8	1884.0	24.0	1927.2	23.1	95.73993358239933	conglomerate	sedimentary	1641	37797	9719	Cadomin Fm	122.0	126.1	True	1927.2	Mesozoic
619	37463	SK	10.1130/GES01313.1	1635.7	58.5	1676.1	58.2	1726.5	99.9	94.74080509701709	sandstone	sedimentary	520	16418	4285	Simsboro Sand Mbr	56.0	56.8	True	1635.7	Cenozoic
620	40663	LA1	10.1306/10191515029	1959.7	40.8	1935.8	22.0	1910.4	14.8	102.58061139028476	sandstone	sedimentary	1625	37218	9542	McMurray Fm	111.75	125.0	True	1910.4	Mesozoic
621	28691	06GC155	10.1130/L121.1	1785.0	32.0	1795.0	28.0	1806.0	48.0	98.83720930232558	sandstone	sedimentary	491	15037	4000	Supai Fm	282.0	313.75	True	1785.0	Paleozoic*
622	35271	99CAT22	10.1130/B30860.1	2680.4	44.6	2649.3	19.4	2625.6	4.6	102.08714198659354	sandstone	sedimentary	477	14497	3843	Maple Canyon Fm	658.6113	663.3331	True	2625.6
623	34492	6950	10.1130/B25989.1	2688.0	118.0			2690.0	46.0	99.92565055762081	sandstone	sedimentary	757	22001	6028	Dunvegan	1326.25	1351.0	True	2690.0
624	40661	KE3	10.1306/10191515029	908.9	29.0	908.8	41.2	908.6	123.0	100.033017829628	sandstone	sedimentary	1625	37218	9542	McMurray Fm	111.75	125.0	True	908.9	Mesozoic
625	35300	GV45	http://gsabulletin.gsapubs.org/content/114/12/1564.short	148.9	9.3						sandstone	sedimentary	260	6973	1767	Yolo Fm	88.925	90.825	True	148.9
626	42906	FCB-AD	http://ir.uiowa.edu/etd/3119	407.0	18.2	422.0	17.8	501.0	50.8	81.2375249500998	sandstone	sedimentary	90	3423	691	Cherokee Gp	311.0	319.0	True	407.0
627	35321	LF020	10.1130/G33746.1	120.0	58.0						sandstone	sedimentary	261	7062	1794	Tyee Fm	45.85	46.5	True	120.0
628	29188	XOM-MDB-78	10.1130/G35513.1	165.7	10.6	162.4	19.0	113.6	255.6	145.86267605633802	sandstone	sedimentary	518	16247	4268	Frio Fm	24.2975	28.1	True	165.7
629	30883	TMS011	http://digitalscholarship.unlv.edu/thesesdissertations/1522/	2014.1	28.2	2028.1	15.0	2042.3	8.8	98.61920383880918	sandstone	sedimentary	468	14065	3728	Muddy Creek Fm	5.333	11.62	True	2042.3	Cenozoic
630	29093	CS12-1	10.1130/B30884.1	1810.0	43.0	1818.0	26.0	1828.0	13.0	99.01531728665208	sandstone	sedimentary	54	1940	302	Lanoria Quartzite	1034.0	1101.0	True	1828.0
631	30340	Santiago	10.1130/B31065.1	1431.1	65.2	1434.7	45.6	1440.0	58.4	99.38194444444444	sandstone	sedimentary	208	6392	1543	Santiago Fm	32.45	47.8	True	1440.0	Cenozoic
632	28679	06SP21-22	10.1130/B30029.1	391.6	8.8	434.8	25.6	670.5	147.1	58.40417598806861	conglomerate	sedimentary	465	13948	3704	Sheep Pass Fm	34.875	46.175	False	391.6
633	34717	C403685	10.1144/M35.37	1269.0	24.0			1290.0	38.0	98.37209302325581	sandstone	sedimentary	1533	35311	8894	Deer Bay Fm	134.625	152.1	True	1269.0	Mesozoic
634	45592	B-Nankoweap	https://doi.org/10.1130/B31532.1	1419.0	26.0	1419.0	38.0	1421.0	49.4	99.85925404644617	sandstone	sedimentary	491	36857	9434	Nankoweap Fm	767.6	770.4	True	1419.0
635	28702	Lower_Hermit	10.1130/L121.1	1001.0	64.0	1020.0	58.0	1060.0	122.0	94.43396226415095	sandstone	sedimentary	491	15036	4000	Hermit Shale	279.7375	282.0	True	1001.0	Paleozoic*
636	37780	08-208	http://ir.uiowa.edu/etd/3496/	468.0	16.0	467.0	20.0	461.0	92.0	101.51843817787419	sandstone	sedimentary	1571	35874	9069	Cranstone Fm	438.5	443.8	True	468.0
637	43193	CP11	10.2110/jsr.2008.088	1323.2	30.2	1378.1	30.0	1464.0	58.0	90.38251366120218	sandstone	sedimentary	491	15048	4002	Chinle Fm	201.3	232.0	False	1323.2
638	43169	BENYON-216	10.2110/jsr.2014.16	2497.1	157.6	2580.6	72.2	2646.9	20.6	94.3405493218482	sandstone	sedimentary	1625	37220	9542	Wabiskaw Fm	109.25	110.5	True	2646.9	Mesozoic
639	41552	61206-1	10.2475/05.2010.01	492.2	10.2						quartzite	metamorphic	377	10409	2689	Waits River Fm	412.9	424.1	True	492.2
640	29169	XOM-MDB-59	10.1130/G35513.1	102.0	4.0	103.2	8.4	129.8	180.8	78.58243451463791	sandstone	sedimentary	519	16306	4277	Frio Fm	22.3825	31.0	True	102.0
641	28999	09ANJ13	10.1130/B30818.1	80.0	16.0	81.0	36.0				sandstone	sedimentary	413	11096	2971	Valdez Gp	67.525	83.6	True	80.0
642	37459	F1	10.1130/GES01313.1	419.7	36.7	421.6	33.6	431.7	82.3	97.22029186935372	sandstone	sedimentary	520	16417	4285	Calvert Bluff Fm	54.6333	56.0	True	419.7
643	29115	XOM-AOS-25	10.1130/G35513.1	1146.2	26.8	1145.7	29.2	1144.7	67.6	100.1310387000961	sandstone	sedimentary	1625	37218	9542	McMurray Fm	111.75	125.0	True	1146.2	Mesozoic
644	29103	XOM-AOS-04	10.1130/G35513.1	1892.5	57.6	1878.3	34.4	1862.6	35.4	101.60528293782885	sandstone	sedimentary	1625	37218	9542	McMurray Fm	111.75	125.0	True	1862.6	Mesozoic
645	28733	6152	10.1130/B30260.1	181.6	12.2			139.6	89.0	130.0859598853868	sandstone	sedimentary	290	7501	1979	Hyde Fm	176.25	180.55	True	181.6
646	30876	TMS002	http://digitalscholarship.unlv.edu/thesesdissertations/1522/	1676.7	34.6	1662.1	19.6	1643.8	8.4	102.00146003163402	sandstone	sedimentary	468	14065	3728	Muddy Creek Fm	5.333	11.62	True	1643.8	Cenozoic
647	43172	12-LHCC04	10.2110/jsr.2014.33	1769.6	67.8	1775.4	38.4	1782.2	23.4	99.2930086410055	sandstone	sedimentary	491	15053	4003	Straight Cliffs Sandstone	87.175	95.55	True	1782.2	Mesozoic
648	40235	05LF13	10.1130/L533.1	1963.0	75.0	1932.0	40.0	1909.0	39.0	102.82870612886327	sandstone	sedimentary	152	5332	1258	Neruokpuk Quartzite	541.0	598.375	True	1909.0	Cambrian
649	28681	07NW2	10.1130/B30029.1	1893.7	17.9	1856.3	12.6	1814.6	18.2	104.3590874021823	siltstone	sedimentary	463	13837	3673	Newark Canyon Fm	113.0	122.0	False	1893.7
650	29206	51210	10.1130/B30999.1	97.1	2.2	96.4	11.0	78.8	278.5	123.22335025380711	sandstone	sedimentary	504	15543	4128	Ericson Sandstone	81.6833	89.8	True	97.1
651	29095	CS12-4	10.1130/B30884.1	1449.0	42.0	1471.0	32.0	1503.0	24.0	96.40718562874251	sandstone	sedimentary	57	2076	10063	Hazel Fm	1029.5	1034.0	True	1503.0
652	29063	HB0110	10.1130/B30824.1	442.3	19.2	439.9	21.8	427.5	92.0	103.46198830409357	sandstone	sedimentary	515	16004	4229	Goose Egg Fm	278.9834	280.4916	True	442.3
653	28578	T4	10.1130/B30120.1	3412.4	36.4	3292.6	50.6	3421.2	24.0	99.742780311002	sandstone	sedimentary	1657	38191	9877	Imperial Fm	362.225	382.7	False	3421.2
654	34492	6950	10.1130/B25989.1	2552.0	98.0			2600.0	24.0	98.15384615384616	sandstone	sedimentary	757	22001	6028	Dunvegan	1326.25	1351.0	True	2600.0
655	29939	CG11-5	10.1130/GES00917.1	1075.0	20.0	1083.0	17.0	1110.5	37.4	96.80324178298063	sandstone	sedimentary	525	16764	4317	Catahoula Fm	20.44	26.41	True	1075.0	Cenozoic
656	30310	GVG09-15	10.1130/B31065.1	458.1	7.0	455.2	35.0	440.9	209.6	103.90111136312089	sandstone	sedimentary	252	6880	1748	Deer Valley Fm	66.0	67.525	True	458.1
657	43172	12-LHCC04	10.2110/jsr.2014.33	1012.3	34.8	1014.3	28.6	1018.7	50.2	99.37174830666535	sandstone	sedimentary	491	15053	4003	Straight Cliffs Sandstone	87.175	95.55	True	1012.3	Mesozoic
658	34883	09-CR3	10.1130/GES00982.1	2753.5	93.2	2732.0	45.8	2716.1	40.8	101.37697433820551	sand	sedimentary	491	36857	9434	Nankoweap Fm	767.6	770.4	True	2716.1
659	34883	09-CR3	10.1130/GES00982.1	2753.5	93.2	2732.0	45.8	2716.1	40.8	101.37697433820551	sand	sedimentary	491	15026	9432	Sixtymile Fm	508.955	541.0	True	2716.1	Cambrian
660	43192	CP8	10.2110/jsr.2008.088	1444.6	108.8	1456.1	69.6	1473.0	62.0	98.07196198234895	sandstone	sedimentary	490	15005	3991	Moenkopi Fm	247.2	251.902	True	1473.0	Mesozoic
661	29198	51107	10.1130/B30999.1	1594.5	132.6	1573.8	83.7	1546.1	86.7	103.13045727960674	sandstone	sedimentary	501	15438	4096	Cedar Mountain Fm and Burro Canyon Fm	122.0	125.0	True	1546.1	Mesozoic
662	45596	U-Nankoweap	https://doi.org/10.1130/B31532.1	1163.0	12.0	1157.0	18.0	1148.0	23.4	101.30662020905923	sandstone	sedimentary	491	36857	9434	Nankoweap Fm	767.6	770.4	True	1163.0
663	28699	Hermit	10.1130/L121.1	1666.0	90.0	1682.0	86.0	1702.0	154.0	97.88484136310224	sandstone	sedimentary	491	15036	4000	Hermit Shale	279.7375	282.0	True	1666.0	Paleozoic*
664	37261	09LR01	10.1130/L557.1	1757.0	46.0			1876.0	42.0	93.65671641791045	quartzite	metamorphic	325	8781	2219	Kinnikinic Quartzite	456.5	470.0	True	1876.0	Paleozoic*
665	29105	XOM-AOS-06	10.1130/G35513.1	170.5	7.6	172.1	16.8	194.5	224.0	87.66066838046272	sandstone	sedimentary	1625	37219	9542	Clearwater Fm	110.5	111.75	True	170.5
666	29174	XOM-MDB-64	10.1130/G35513.1	1490.5	128.2	1558.8	77.0	1652.5	12.8	90.19667170953102	sandstone	sedimentary	519	16319	4277	Wilcox Fm	49.85	53.95	True	1652.5	Cenozoic
667	45596	U-Nankoweap	https://doi.org/10.1130/B31532.1	1810.0	94.0	1802.0	54.0	1793.0	37.8	100.94813162297825	sandstone	sedimentary	491	36857	9434	Nankoweap Fm	767.6	770.4	True	1793.0
668	28834	08-TH-05	10.1130/B30530.1	2012.0	59.0	1974.0	39.0	1934.0	56.0	104.03309203722854	sandstone	sedimentary	755	21969	6012	Glenelg	898.64	945.12	True	1934.0
669	28834	08-TH-05	10.1130/B30530.1	2012.0	59.0	1974.0	39.0	1934.0	56.0	104.03309203722854	sandstone	sedimentary	755	21968	6012	Reynolds Point	880.16	898.64	True	1934.0
670	28834	08-TH-05	10.1130/B30530.1	2012.0	59.0	1974.0	39.0	1934.0	56.0	104.03309203722854	sandstone	sedimentary	755	21967	6012	Minto	861.68	880.16	True	1934.0
671	28834	08-TH-05	10.1130/B30530.1	2012.0	59.0	1974.0	39.0	1934.0	56.0	104.03309203722854	sandstone	sedimentary	755	21966	6012	Wynniatt	811.0	861.68	True	1934.0
672	28834	08-TH-05	10.1130/B30530.1	2012.0	59.0	1974.0	39.0	1934.0	56.0	104.03309203722854	sandstone	sedimentary	755	21965	6012	Kilian	780.2	811.0	True	1934.0
673	28676	05SP14-20	10.1130/B30029.1	1897.2	16.4	1900.2	13.2	1903.4	20.9	99.6742671009772	conglomerate	sedimentary	465	13948	3704	Sheep Pass Fm	34.875	46.175	True	1897.2	Cenozoic
674	29060	FU0108	10.1130/B30824.1	480.8	14.0	445.5	39.0	267.2	238.0	179.94011976047904	sandstone	sedimentary	515	16018	4233	Flathead Sandstone	503.5	511.0	True	480.8
675	29179	XOM-MDB-69	10.1130/G35513.1	1825.7	17.4	1824.8	12.4	1823.7	17.6	100.1096671601689	sandstone	sedimentary	520	16415	4285	Wilcox Fm	49.85	53.2667	True	1825.7	Cenozoic
676	29163	XOM-MDB-53	10.1130/G35513.1	1052.9	98.4	1057.3	68.4	1066.5	48.8	98.72480075011721	sandstone	sedimentary	521	16461	4289	Dexter Sand	95.319	96.9756	True	1066.5	Mesozoic
677	34161	Parry8	10.1139/e2012-067	1352.3	28.9	1376.0	37.0	1315.2	23.8	102.82086374695864	sandstone	sedimentary	1502	34763	8718	Parry Islands Fm	368.875	374.825	True	1315.2	Paleozoic*
678	34160	Parry7	10.1139/e2012-067	2965.8	29.5	3247.6	68.2	2780.0	13.4	106.68345323741006	sandstone	sedimentary	1517	34961	8808	Parry Islands Fm	368.875	374.5625	False	2780.0
679	29214	Sam-17	10.1130/B30999.1	85.3	4.4	84.0	7.2	49.4	175.2	172.67206477732793	sandstone	sedimentary	501	15433	4094	Mesaverde Gp	66.0	74.975	True	85.3
680	35309	KDS03	http://gsabulletin.gsapubs.org/content/114/12/1564.short	102.1	6.7						sandstone	sedimentary	260	6970	1767	Guinda Fm	84.05	84.5	True	102.1
681	34911	37-FC063	10.1130/GES00982.1	97.0	3.8	109.6	6.4				sandstone	sedimentary	222	6547	1598	Imperial Fm	3.347	4.0333	False	97.0
682	29056	EB0510	10.1130/B30824.1	2909.1	80.2	3011.9	70.2	3081.2	102.6	94.41451382578217	sandstone	sedimentary	515	15987	4229	Meeteetse Fm	72.1	80.725	True	2909.1	Mesozoic
683	43653	C-194771	10.1144/jgs2014-027	1065.0	23.0	1098.0	22.0	1155.0	19.0	92.20779220779221	sandstone	sedimentary	1566	35810	9042	Lands Lokk Fm	426.3	433.4	False	1155.0
684	34500	7812	10.1130/B25989.1	2563.0	56.0			2595.0	20.0	98.76685934489403	sandstone	sedimentary	757	22001	6028	Dunvegan	1326.25	1351.0	True	2595.0
685	40659	KE1	10.1306/10191515029	1328.6	33.0	1305.9	21.2	1268.7	17.0	104.7213683297864	sandstone	sedimentary	1625	37218	9542	McMurray Fm	111.75	125.0	True	1268.7	Mesozoic
686	35320	JW-290	10.1130/G33746.1	50.9	5.7	18.6	57.8				sandstone	sedimentary	266	7121	1825	Tyee Fm	45.6334	46.7166	True	50.9
687	42838	TF2002	10.1139/E09-065	1773.1	24.5	1744.7	44.3	1768.7	50.6	100.24877028325889	sandstone	sedimentary	1489	34401	8593	Toad	240.75	250.525	True	1773.1	Mesozoic
688	43200	CP42	10.2110/jsr.2008.088	520.8	24.3	506.2	23.1	440.7	70.0	118.17562968005446	sandstone	sedimentary	483	14779	3927	Chinle Fm	206.7	237.0	True	520.8
689	29125	XOM-MDB-10	10.1130/G35513.1	1114.5	35.8	1103.8	23.8	1082.6	9.0	102.94661001293183	sandstone	sedimentary	531	17122	4364	Wilcox Gp	53.2667	58.4	True	1082.6	Cenozoic
690	28680	06SP29-30	10.1130/B30029.1	1081.9	14.9	1072.9	23.4	1054.7	64.5	102.57893239783824	siltstone	sedimentary	465	13948	3704	Sheep Pass Fm	34.875	46.175	True	1081.9	Cenozoic
691	43652	C-054480	10.1144/jgs2014-027	834.0	14.0	833.0	14.0	837.0	23.0	99.6415770609319	sandstone	sedimentary	1566	35810	9042	Lands Lokk Fm	426.3	433.4	True	834.0	Paleozoic*
692	45592	B-Nankoweap	https://doi.org/10.1130/B31532.1	1075.0	30.0	1127.0	74.0	1228.0	96.2	87.54071661237785	sandstone	sedimentary	491	36857	9434	Nankoweap Fm	767.6	770.4	True	1075.0
693	45604	K065715	https://doi.org/10.1130/B31532.1	1477.0	30.0	1472.0	24.0	1465.0	39.0	100.81911262798636	sandstone	sedimentary	491	36852	9433	Carbon Butte Member	736.8	742.4	True	1477.0
694	34458	14LB03	10.1130/B25896.1	17.6	1.4						sandstone	sedimentary	294	7477	1973	Grassy Mountain Fm	5.333	11.895	True	17.6
695	28712	Upper_Hermit	10.1130/L121.1	1111.0	136.0	1140.0	98.0	1194.0	94.0	93.04857621440536	sandstone	sedimentary	491	15036	4000	Hermit Shale	279.7375	282.0	True	1194.0	Paleozoic*
696	37801	EAH-39	http://cedar.wwu.edu/wwuet/356/	1586.7	13.7	1646.8	8.2	1724.3	4.3	92.01995012468828	metasedimentary	metamorphic	1446	33546	8154	Yellow Aster Complex Fm	458.4	508.5	False	1724.3
697	30821	17PL02	http://www.mbmg.mtech.edu/pdf-open-files/mbmg569/mbmg569.pdf	91.8	9.6						sandstone	sedimentary	332	9034	2282	Renova Fm	23.03	38.675	True	91.8
698	42627	MS2	10.1086/669230	2713.2	58.5	2734.0	29.3	2749.3	26.5	98.6869384934347	sandstone	sedimentary	187	6133	6345	Mt Simon Fm	498.375	499.95	True	2749.3	Cambrian
699	28570	I2	10.1130/B30120.1	1704.0	17.8	1696.4	28.9	1743.4	48.1	97.74004818171389	sandstone	sedimentary	1652	38082	9828	Imperial Fm	380.075	382.7	True	1704.0	Paleozoic*
700	29190	XOM-MDB-80	10.1130/G35513.1	216.9	11.0	209.9	38.8	131.8	467.4	164.56752655538696	sandstone	sedimentary	518	16247	4268	Frio Fm	24.2975	28.1	True	216.9
701	34918	44-FC06-2	10.1130/GES00982.1	1598.9	33.4	1624.9	25.0	1658.7	37.0	96.39476698619401	sandstone	sedimentary	825	22959	6465	Diablo Fm of Palm Spring Gp	2.588	4.0333	True	1598.9	Cenozoic
702	35713	K03DV04	10.1016/j.precamres.2014.06.005	2611.3	189.6	2621.0	88.8	2628.6	56.6	99.34185497983718	arkose	sedimentary	464	13875	3691	Crystal Spring Fm	686.0	703.0	True	2628.6
703	35696	Samp_02	10.1016/j.sedgeo.2005.07.014	1192.7	31.0	1019.3	274.4	663.3	177.6	179.81305593245892	sandstone	sedimentary	301	7799	2027	Pottsville Gp	312.0	319.0	True	1192.7	Paleozoic*
704	28999	09ANJ13	10.1130/B30818.1	102.0	6.0	102.0	6.0				sandstone	sedimentary	413	11096	2971	Valdez Gp	67.525	83.6	True	102.0
705	34158	Parry5	10.1139/e2012-067	2021.2	58.5	2036.6	116.2	2005.6	21.5	100.77782209812526	sandstone	sedimentary	1527	35189	8870	Parry Islands Fm	362.225	374.825	True	2005.6	Paleozoic*
706	29108	XOM-AOS-12	10.1130/G35513.1	165.9	5.8	165.8	40.8	163.1	620.6	101.71673819742489	sandstone	sedimentary	1625	37221	9542	Grand Rapids Fm	108.0	109.25	True	165.9
707	28833	07-YHL-44	10.1130/B30530.1	1355.0	45.0	1377.0	46.0	1378.0	20.0	98.33091436865021	sandstone	sedimentary	1653	38100	9839	Saline River Fm	501.0	503.5	True	1378.0	Cambrian
708	37760	14-6c	https://uh-ir.tdl.org/uh-ir/handle/10657/964	96.6	2.6	100.3	4.8	190.0	112.7	50.8421052631579	sandstone	sedimentary	1633	37499	9607	Dunvegan Fm	95.0	96.1	True	96.6
709	40662	KE4	10.1306/10191515029	442.4	8.6	451.4	19.8	497.5	110.8	88.92462311557789	sandstone	sedimentary	1625	37218	9542	McMurray Fm	111.75	125.0	True	442.4
710	42092	WY-210	http://gsabulletin.gsapubs.org/content/111/12/1876	109.0	10.0						loess	sedimentary	508	15755	4173	Unnamed	23.03	24.2975	True	109.0
711	42092	WY-210	http://gsabulletin.gsapubs.org/content/111/12/1876	109.0	10.0						loess	sedimentary	508	15754	4173	White River Fm	23.03	34.875	True	109.0
712	29207	51211	10.1130/B30999.1	537.3	56.4	579.1	51.1	746.4	80.2	71.98553054662379	sandstone	sedimentary	504	15542	4128	Almond Fm	79.7667	81.6833	True	537.3
713	29124	XOM-MDB-09	10.1130/G35513.1	1038.9	17.8	1042.8	14.4	1051.0	24.0	98.84871550903901	sandstone	sedimentary	526	16848	4323	Lower Frio Mbr	26.8325	27.4663	True	1038.9	Cenozoic
714	29124	XOM-MDB-09	10.1130/G35513.1	1038.9	17.8	1042.8	14.4	1051.0	24.0	98.84871550903901	sandstone	sedimentary	526	16847	4323	Middle Frio Mbr	24.9313	26.8325	True	1038.9	Cenozoic
715	29124	XOM-MDB-09	10.1130/G35513.1	1038.9	17.8	1042.8	14.4	1051.0	24.0	98.84871550903901	sandstone	sedimentary	526	16846	4323	Upper Frio Mbr	24.2975	24.9313	True	1038.9	Cenozoic
716	29203	51207	10.1130/B30999.1	101.8	3.7	101.8	7.3	100.9	157.3	100.89197224975223	sandstone	sedimentary	504	15545	4128	Blair Fm	90.825	92.875	True	101.8
717	28735	7015	10.1130/B30260.1	414.4	16.2			576.6	48.0	71.86958029830038	sandstone	sedimentary	290	7498	1979	Lonesome Fm	163.5	164.15	True	414.4
718	29138	XOM-MDB-25	10.1130/G35513.1	1136.9	54.2	1134.2	36.4	1129.0	24.4	100.69973427812224	sandstone	sedimentary	527	16912	4331	Nanafalia Fm	56.8	58.1333	True	1129.0	Cenozoic
719	29138	XOM-MDB-25	10.1130/G35513.1	1136.9	54.2	1134.2	36.4	1129.0	24.4	100.69973427812224	sandstone	sedimentary	527	16911	4331	Tuscahoma Fm	54.975	56.8	True	1129.0	Cenozoic
720	29138	XOM-MDB-25	10.1130/G35513.1	1136.9	54.2	1134.2	36.4	1129.0	24.4	100.69973427812224	sandstone	sedimentary	527	16910	4331	Bashi Fm	53.95	54.975	True	1129.0	Cenozoic
721	29138	XOM-MDB-25	10.1130/G35513.1	1136.9	54.2	1134.2	36.4	1129.0	24.4	100.69973427812224	sandstone	sedimentary	527	16909	4331	Hatchetigbee Fm	52.925	53.95	True	1129.0	Cenozoic
722	28641	OS0884	10.1130/G31335.1	2565.8	70.0	2518.1	31.0	2479.9	7.8	103.46384934876406	metasedimentary	metamorphic	491	15025	3995	Vishnu Schist	1690.0	1887.5	True	2479.9
723	43621	10102	10.1130/B30843.1	2164.0	60.0			2279.0	34.0	94.95392716103554	sandstone	sedimentary	1549	35617	8964	Rawlings Bay Fm	521.0	522.3334	True	2279.0	Cambrian
724	28867	PIO509	http://specialpapers.gsapubs.org/content/487/63.abstract	1050.6	20.6	1068.3	16.0	1104.6	23.3	95.1113525258012	sandstone	sedimentary	332	9034	2282	Renova Fm	23.03	38.675	True	1050.6	Cenozoic
725	29146	XOM-MDB-34	10.1130/G35513.1	1807.0	48.2	1805.4	27.4	1803.7	19.8	100.18295725453235	sandstone	sedimentary	526	16848	4323	Lower Frio Mbr	26.8325	27.4663	True	1803.7	Cenozoic
726	29146	XOM-MDB-34	10.1130/G35513.1	1807.0	48.2	1805.4	27.4	1803.7	19.8	100.18295725453235	sandstone	sedimentary	526	16847	4323	Middle Frio Mbr	24.9313	26.8325	True	1803.7	Cenozoic
727	29146	XOM-MDB-34	10.1130/G35513.1	1807.0	48.2	1805.4	27.4	1803.7	19.8	100.18295725453235	sandstone	sedimentary	526	16846	4323	Upper Frio Mbr	24.2975	24.9313	True	1803.7	Cenozoic
728	40702	11HW-33	10.2475/06.2015.02	70.2	8.2	71.1	32.8	103.5	1106.8	67.82608695652173	sandstone	sedimentary	413	11097	2972	Orca Gp	53.95	64.9	True	70.2
729	28674	05KC01	10.1130/B30029.1	34.5	1.4	35.1	3.7	73.9	236.6	46.68470906630582	sandstone	sedimentary	465	13947	3704	Kinsey Canyon Fm	33.9	34.875	True	34.5
730	35712	K03DV03	10.1016/j.precamres.2014.06.005	1727.3	11.8	1738.0	18.0	1750.9	36.6	98.65212176594893	conglomerate	sedimentary	464	13875	3691	Crystal Spring Fm	686.0	703.0	True	1727.3
731	34178	05KP42	http://www.carleton.edu/departments/geol/Resources/comps/CompsPDFfiles/2006CompsPapers/Lundquist2006.pdf	2725.5	30.9	2734.4	49.1	2718.9	21.2	100.2427452278495	quartzite	metamorphic	192	6172	1477	Palms Fm	1937.5	2162.5	True	2718.9
732	45596	U-Nankoweap	https://doi.org/10.1130/B31532.1	1307.0	50.0	1310.0	40.0	1314.0	65.0	99.46727549467275	sandstone	sedimentary	491	36857	9434	Nankoweap Fm	767.6	770.4	True	1307.0
733	29140	XOM-MDB-27	10.1130/G35513.1	1091.5	24.0	1091.0	40.6	1089.8	111.8	100.15599192512389	sandstone	sedimentary	527	16912	4331	Nanafalia Fm	56.8	58.1333	True	1091.5	Cenozoic
734	29140	XOM-MDB-27	10.1130/G35513.1	1091.5	24.0	1091.0	40.6	1089.8	111.8	100.15599192512389	sandstone	sedimentary	527	16911	4331	Tuscahoma Fm	54.975	56.8	True	1091.5	Cenozoic
735	29140	XOM-MDB-27	10.1130/G35513.1	1091.5	24.0	1091.0	40.6	1089.8	111.8	100.15599192512389	sandstone	sedimentary	527	16910	4331	Bashi Fm	53.95	54.975	True	1091.5	Cenozoic
736	29140	XOM-MDB-27	10.1130/G35513.1	1091.5	24.0	1091.0	40.6	1089.8	111.8	100.15599192512389	sandstone	sedimentary	527	16909	4331	Hatchetigbee Fm	52.925	53.95	True	1091.5	Cenozoic
737	29127	XOM-MDB-12	10.1130/G35513.1	977.8	100.2	973.2	70.0	962.8	37.0	101.55795596177815	sandstone	sedimentary	527	16912	4331	Nanafalia Fm	56.8	58.1333	True	962.8	Cenozoic
738	29127	XOM-MDB-12	10.1130/G35513.1	977.8	100.2	973.2	70.0	962.8	37.0	101.55795596177815	sandstone	sedimentary	527	16911	4331	Tuscahoma Fm	54.975	56.8	True	962.8	Cenozoic
739	29127	XOM-MDB-12	10.1130/G35513.1	977.8	100.2	973.2	70.0	962.8	37.0	101.55795596177815	sandstone	sedimentary	527	16910	4331	Bashi Fm	53.95	54.975	True	962.8	Cenozoic
740	29127	XOM-MDB-12	10.1130/G35513.1	977.8	100.2	973.2	70.0	962.8	37.0	101.55795596177815	sandstone	sedimentary	527	16909	4331	Hatchetigbee Fm	52.925	53.95	True	962.8	Cenozoic
741	30847	08MC20	http://digitalscholarship.unlv.edu/thesesdissertations/145	1807.5	43.2	1846.2	43.0	1890.1	76.4	95.62986085392308	sand	sedimentary	468	14065	3728	Muddy Creek Fm	5.333	11.62	True	1807.5	Cenozoic
742	29047	CCR0210	10.1130/B30824.1	424.6	30.0	433.2	37.2	479.1	168.4	88.6245042788562	sandstone	sedimentary	515	15993	4229	Morrison Fm	145.0	158.354	True	424.6
743	35340	SR1	http://scielo.unam.mx/pdf/rmcg/v23n3/v23n3a2.pdf	537.0	24.0	221.0	420.0	532.0	58.0	100.93984962406014	sandstone	sedimentary	1431	33135	7741	Santa Rosa	304.975	317.125	True	537.0
744	35340	SR1	http://scielo.unam.mx/pdf/rmcg/v23n3/v23n3a2.pdf	537.0	24.0	221.0	420.0	532.0	58.0	100.93984962406014	sandstone	sedimentary	1431	33134	7740	Santa Rosa	332.125	349.975	True	537.0
745	42912	IB-D1	http://ir.uiowa.edu/etd/3119	977.0	30.2	973.0	33.4	964.0	84.8	101.34854771784232	sandstone	sedimentary	432	13132	3464	Bernadotte Sandstone Mbr	312.9333	313.8813	True	977.0	Paleozoic*
746	35259	23EAB10	10.1130/B30860.1	2603.3	66.2	2596.0	42.0	2590.3	54.4	100.50187236999575	siliciclastic	sedimentary	477	14498	3843	Perry Canyon Fm	663.3331	668.0557	True	2590.3
747	37459	F1	10.1130/GES01313.1	1789.3	68.1	1799.7	38.5	1811.9	24.4	98.75269054583586	sandstone	sedimentary	520	16417	4285	Calvert Bluff Fm	54.6333	56.0	True	1811.9	Cenozoic
748	34899	25-325061	10.1130/GES00982.1	1699.7	39.0	1683.6	27.0	1663.6	37.0	102.16999278672758	sand	sedimentary	35	1731	221	Bouse Fm	4.0333	5.6518	True	1663.6	Cenozoic
749	43186	TRU	10.2110/jsr.2008.088	223.3	4.8	223.7	15.0	228.0	64.0	97.93859649122807	sandstone	sedimentary	71	2538	461	Trujillo Fm	227.0	237.0	True	223.3
750	31611	20618	http://www.nature.com/ngeo/journal/v1/n8/abs/ngeo259.html	155.0	3.4						sand	sedimentary	236	6746	1691	Hornbrook Fm	70.575	85.625	True	155.0
751	29158	XOM-MDB-47	10.1130/G35513.1	97.5	7.8	95.6	15.4	49.5	351.6	196.96969696969697	sandstone	sedimentary	165	5752	1344	Wilcox Gp	41.3	56.0	True	97.5
752	29935	CG11-1	10.1130/GES00917.1	1159.0	23.0	1157.0	18.0	1155.0	44.3	100.34632034632035	sandstone	sedimentary	526	16838	4323	Upper Fleming Mbr	3.6	11.62	True	1159.0	Cenozoic
753	29935	CG11-1	10.1130/GES00917.1	1159.0	23.0	1157.0	18.0	1155.0	44.3	100.34632034632035	sandstone	sedimentary	526	16840	4323	Lower Fleming Mbr	14.3575	28.1	True	1159.0	Cenozoic
754	29935	CG11-1	10.1130/GES00917.1	1159.0	23.0	1157.0	18.0	1155.0	44.3	100.34632034632035	sandstone	sedimentary	526	16839	4323	Middle Fleming Mbr	11.62	14.3575	True	1159.0	Cenozoic
755	28570	I2	10.1130/B30120.1	1533.4	61.8	1778.2	124.4	2131.7	130.9	71.93319885537365	sandstone	sedimentary	1652	38082	9828	Imperial Fm	380.075	382.7	False	1533.4
756	40696	RB12-04	10.2475/06.2015.02	261.7	18.6	268.2	19.0	324.8	81.0	80.57266009852216	sandstone	sedimentary	413	11097	2972	Orca Gp	53.95	64.9	True	261.7
757	28709	Tem_Butte2	10.1130/L121.1	1577.0	46.0	1655.0	38.0	1755.0	58.0	89.85754985754986	conglomerate	sedimentary	491	15031	3998	Temple Butte Limestone	358.9	379.925	False	1577.0
758	28688	3-26-04-23	10.1130/B30206.1	157.3	6.4	150.6	61.8	45.5	1062.0	345.7142857142857	sandstone	sedimentary	35	2899	528	McCoy Mountains Fm	116.0	168.8	True	157.3
759	28683	3-24-04-12	10.1130/B30206.1	237.2	6.0	234.6	49.4	209.4	545.4	113.27602674307545	sandstone	sedimentary	35	2899	528	McCoy Mountains Fm	116.0	168.8	True	237.2
760	43196	CP20	10.2110/jsr.2008.088	1031.9	8.2	1019.8	14.8	994.0	44.0	103.81287726358148	sandstone	sedimentary	490	15003	3990	Chinle Fm	201.3	232.0	True	1031.9	Mesozoic
761	29065	MH0110	10.1130/B30824.1	98.4	6.4	99.0	12.0	112.7	259.6	87.3114463176575	sandstone	sedimentary	515	15991	4229	Mowry Shale	100.5	125.0	True	98.4
762	30326	SG-22	10.1130/B31065.1	81.0	2.8						sandstone	sedimentary	561	17795	4624	Lodo Fm	58.6667	59.2	True	81.0
763	42888	C-100629	10.1139/E10-006	1825.0	44.0	1835.0	26.0	1848.0	22.0	98.75541125541126	sandstone	sedimentary	1535	35351	8902	Isachsen Fm	113.0	126.1	True	1848.0	Mesozoic
764	34754	AE1	10.1029/2005TC001830	1479.0	94.0	1825.0	79.0	2246.0	57.0	65.85040071237756	sandstone	sedimentary	1545	35561	8952	Bjorne Fm	247.2	251.6755	False	2246.0
765	28676	05SP14-20	10.1130/B30029.1	1226.1	25.5	1234.2	18.0	1248.3	20.8	98.22158135063687	conglomerate	sedimentary	465	13948	3704	Sheep Pass Fm	34.875	46.175	True	1248.3	Cenozoic
766	34913	39-FC126	10.1130/GES00982.1	35.0	1.4	34.7	5.0				sandstone	sedimentary	222	6547	1598	Imperial Fm	3.347	4.0333	True	35.0
767	29126	XOM-MDB-11	10.1130/G35513.1	696.7	45.4	759.3	91.6	948.2	321.4	73.47605990297406	sandstone	sedimentary	524	16740	4314	Wilcox Gp	49.85	58.4	True	696.7	Cenozoic
768	28695	B_Angel_3	10.1130/L121.1	1324.0	86.0	1329.0	54.0	1337.0	34.0	99.02767389678384	shale	sedimentary	491	15028	3997	Bright Angel Shale	498.925	506.75	True	1337.0	Cambrian
769	28650	2DB273	10.1130/B30235.1	1138.3	30.6	1128.9	55.6	1110.8	152.0	102.47569319409435	sandstone	sedimentary	510	15822	4187	Indian Meadows Fm	53.95	56.0	True	1138.3	Cenozoic
770	35322	LF021	10.1130/G33746.1	51.0	6.0						sandstone	sedimentary	261	7062	1794	Tyee Fm	45.85	46.5	True	51.0
771	28676	05SP14-20	10.1130/B30029.1	1902.8	56.2	1904.9	30.6	1907.1	18.6	99.7745267683918	conglomerate	sedimentary	465	13948	3704	Sheep Pass Fm	34.875	46.175	True	1907.1	Cenozoic
772	28510	UT0715	10.1130/G30684.1	1920.7	33.2	1921.1	35.2	1921.5	63.8	99.9583658600052	conglomerate	sedimentary	502	15469	4106	Cedar Mountain Fm	122.0	125.0	True	1920.7	Mesozoic
773	35701	11RMAH1	10.1016/j.precamres.2014.06.005	1877.0	47.0	1880.6	26.6	1884.6	21.0	99.59673140188899	siltstone	sedimentary	464	13873	3691	Kingston Peak Fm	660.5	677.5	True	1884.6
774	43173	12-PC05	10.2110/jsr.2014.33	1503.4	41.9	1504.9	29.7	1507.0	40.2	99.76111479761114	sandstone	sedimentary	491	15053	4003	Straight Cliffs Sandstone	87.175	95.55	True	1507.0	Mesozoic
775	30300	CLS506-1	10.1130/B31065.1	109.1	3.6	105.9	13.8	35.2	320.6	309.9431818181818	sandstone	sedimentary	215	6523	1589	Point Loma Fm	70.575	80.725	True	109.1
776	35249	HHP7272	10.1130/B30848.1	1708.4	76.8	1731.0	50.0	1758.4	58.2	97.1565059144677	sandstone	sedimentary	1657	38184	9876	Slats Creek Fm	503.5	511.0	True	1758.4	Cambrian
777	37760	14-6c	https://uh-ir.tdl.org/uh-ir/handle/10657/964	101.3	2.3	187.2	11.0	1481.0	115.9	6.839972991222147	sandstone	sedimentary	1633	37499	9607	Dunvegan Fm	95.0	96.1	False	101.3
778	29058	FH0108	10.1130/B30824.1	1665.0	18.0	1716.3	24.0	1779.3	47.8	93.57612544258978	sandstone	sedimentary	515	15985	4229	Fort Union Fm	50.5333	66.0	False	1665.0
779	34913	39-FC126	10.1130/GES00982.1	224.3	7.2	224.2	9.6				sandstone	sedimentary	222	6547	1598	Imperial Fm	3.347	4.0333	True	224.3
780	29068	NL0108	10.1130/B30824.1	505.9	8.0	499.9	17.2	472.6	89.0	107.04612780363944	sandstone	sedimentary	515	15994	4229	Sundance Fm	158.354	168.8	True	505.9
781	40366	StQ2	10.1139/E06-010					2701.0	32.0		quartzite	metamorphic	196	6242	1498	Fern Creek Fm	2113.0	2140.0	True	2701.0
782	40366	StQ2	10.1139/E06-010					2701.0	32.0		quartzite	metamorphic	196	6241	1498	Sturgeon Quartzite	2059.0	2113.0	True	2701.0
783	40366	StQ2	10.1139/E06-010					2701.0	32.0		quartzite	metamorphic	196	6240	1498	Randville Dolomite	2032.0	2059.0	True	2701.0
784	28512	UT3	10.1130/G30684.1	1725.9	53.6	1728.6	38.0	1731.9	53.2	99.6535596743461	conglomerate	sedimentary	482	14737	3914	Indianola Gp	83.6	145.0	True	1731.9	Mesozoic
785	42886	C-072382	10.1139/E10-006	1639.0	20.0	1639.0	14.0	1640.0	14.0	99.9390243902439	sandstone	sedimentary	1562	35779	9012	Isachsen Fm	113.0	126.1	True	1640.0	Mesozoic
786	40692	11SJO-34	10.2475/06.2015.02	214.1	3.6	215.1	12.0	226.8	138.4	94.40035273368606	sandstone	sedimentary	414	11105	2979	Sitkalidak Fm	32.595	42.925	True	214.1
787	43166	BENYON-190	10.2110/jsr.2014.16	1484.1	63.4	1475.4	38.6	1462.9	24.6	101.44917629366327	sandstone	sedimentary	1625	37218	9542	McMurray Fm	111.75	125.0	True	1462.9	Mesozoic
788	29942	CG11-8	10.1130/GES00917.1	1775.0	24.0	1760.0	13.0	1751.3	38.1	101.35328042025924	sandstone	sedimentary	526	16840	4323	Lower Fleming Mbr	14.3575	28.1	True	1775.0	Cenozoic
789	29942	CG11-8	10.1130/GES00917.1	1775.0	24.0	1760.0	13.0	1751.3	38.1	101.35328042025924	sandstone	sedimentary	526	16839	4323	Middle Fleming Mbr	11.62	14.3575	True	1775.0	Cenozoic
790	29942	CG11-8	10.1130/GES00917.1	1775.0	24.0	1760.0	13.0	1751.3	38.1	101.35328042025924	sandstone	sedimentary	526	16838	4323	Upper Fleming Mbr	3.6	11.62	True	1775.0	Cenozoic
791	30317	GVG09-7	10.1130/B31065.1	94.1	3.8	94.6	18.2	106.9	465.2	88.02619270346118	sandstone	sedimentary	256	6918	1756	Ione Fm	46.175	47.8	True	94.1
792	40672	LL3	10.1306/10191515029	1004.9	30.0	1017.4	32.8	1044.4	80.0	96.21792416698582	sandstone	sedimentary	1625	37218	9542	McMurray Fm	111.75	125.0	True	1004.9	Mesozoic
793	42906	FCB-AD	http://ir.uiowa.edu/etd/3119	1345.0	55.6	1339.0	44.8	1330.0	75.8	101.12781954887218	sandstone	sedimentary	90	3423	691	Cherokee Gp	311.0	319.0	True	1345.0	Paleozoic*
794	37456	CBBS	10.1130/GES01313.1	1066.9	41.5	1159.1	32.4	1335.8	40.5	79.8697409791885	sandstone	sedimentary	520	16417	4285	Calvert Bluff Fm	54.6333	56.0	False	1335.8
795	28672	04LC4	10.1130/B30029.1	1128.9	17.5	1135.7	17.2	1148.8	37.1	98.26775766016713	conglomerate	sedimentary	465	13948	3704	Sheep Pass Fm	34.875	46.175	True	1128.9	Cenozoic
796	35114	JL21B	10.1144/0016-76492008-088	1427.7	34.8	1438.1	25.4	1446.4	9.4	98.70713495575221	siltstone	sedimentary	588	18435	4751	Conception	579.625	618.25	True	1446.4
797	33997	05W170	10.1130/L451.1	200.8	5.8	191.4	19.0	78.0	249.4	257.43589743589746	sandstone	sedimentary	1454	33648	8231	Lewes River	213.125	228.6667	True	200.8
798	33997	05W170	10.1130/L451.1	200.8	5.8	191.4	19.0	78.0	249.4	257.43589743589746	sandstone	sedimentary	1454	33647	8231	Lewes River	228.6667	238.25	True	200.8
799	37270	6PL13	10.1130/L557.1	1944.0	40.0	1970.0	21.0	1998.0	12.0	97.29729729729729	quartzite	metamorphic	324	8736	2206	Phi Kappa Fm	431.9	475.1334	True	1998.0	Paleozoic*
800	35259	23EAB10	10.1130/B30860.1	2597.7	77.0	2609.1	35.0	2617.9	16.4	99.22838916688949	siliciclastic	sedimentary	477	14498	3843	Perry Canyon Fm	663.3331	668.0557	True	2617.9
801	32526	102-98-744	10.1016/j.precamres.2013.09.012					2701.8	10.3		sandstone	sedimentary	776	22250	6173	Island Lake Gp unnamed 1	2710.0	2740.0	True	2701.8
802	32526	102-98-744	10.1016/j.precamres.2013.09.012					2701.8	10.3		sandstone	sedimentary	776	22249	6173	Island Lake Gp unnamed 2	2680.0	2710.0	True	2701.8
803	40707	TI10-07	10.2475/06.2015.02	73.6	12.0	73.8	61.0	78.9	2083.8	93.28263624841571	sandstone	sedimentary	417	11133	2992	Orca Gp	56.8	62.7	True	73.6
804	35309	KDS03	http://gsabulletin.gsapubs.org/content/114/12/1564.short	95.8	4.3						sandstone	sedimentary	260	6970	1767	Guinda Fm	84.05	84.5	True	95.8
805	40693	11SJO-36	10.2475/06.2015.02	1312.1	42.8	1316.6	28.2	1323.9	25.0	99.10869401012161	sandstone	sedimentary	414	11103	2978	Narrow Cape Fm	24.2975	28.1	True	1323.9	Cenozoic
806	40693	11SJO-36	10.2475/06.2015.02	1312.1	42.8	1316.6	28.2	1323.9	25.0	99.10869401012161	sandstone	sedimentary	414	11102	2977	Narrow Cape Fm	13.27	20.44	True	1323.9	Cenozoic
807	34752	94CL53	10.1029/2005TC001830	444.0	11.0	438.0	64.0				sandstone	sedimentary	155	5367	1272	Otuk Fm	168.8	247.2	True	444.0
808	29210	51214	10.1130/B30999.1	425.3	11.4	425.9	36.5	429.2	225.9	99.09133271202236	sandstone	sedimentary	509	15780	4175	Morrison Fm	145.0	158.85	True	425.3
809	45603	K065711	https://doi.org/10.1130/B31532.1	1018.0	54.0	1028.0	42.0	1050.0	70.2	96.95238095238095	sandstone	sedimentary	491	36854	9433	Carbon Canyon Member	748.0	753.6	True	1018.0
810	43170	12-LHCC01	10.2110/jsr.2014.33	1779.0	55.9	1761.4	30.1	1740.6	3.8	102.20613581523612	sandstone	sedimentary	491	15053	4003	Straight Cliffs Sandstone	87.175	95.55	True	1740.6	Mesozoic
811	29031	10ANK16	10.1130/B30818.1	201.0	6.0	192.0	24.0				sandstone	sedimentary	413	11096	2971	Valdez Gp	67.525	83.6	True	201.0
812	29208	51212	10.1130/B30999.1	162.0	2.0	161.2	20.8	150.4	326.3	107.7127659574468	sandstone	sedimentary	504	15544	4128	Rock Springs Fm	89.8	90.825	True	162.0
813	29038	560110	10.1130/B30824.1	97.2	4.8	99.4	23.4	151.7	567.4	64.07382992748846	sandstone	sedimentary	515	15990	4229	Frontier Fm	95.022	100.5	True	97.2
814	29181	XOM-MDB-71	10.1130/G35513.1	175.1	8.0	175.3	9.0	177.9	76.4	98.42608206857786	sandstone	sedimentary	521	16441	4287	Wilcox Gp	49.85	58.4	True	175.1
815	30821	17PL02	http://www.mbmg.mtech.edu/pdf-open-files/mbmg569/mbmg569.pdf	76.5	1.8						sandstone	sedimentary	332	9034	2282	Renova Fm	23.03	38.675	True	76.5
816	43170	12-LHCC01	10.2110/jsr.2014.33	1382.2	32.9	1386.8	20.4	1393.8	10.3	99.16774286124264	sandstone	sedimentary	491	15053	4003	Straight Cliffs Sandstone	87.175	95.55	True	1393.8	Mesozoic
817	28735	7015	10.1130/B30260.1	637.4	18.2			686.2	39.2	92.88837073739434	sandstone	sedimentary	290	7498	1979	Lonesome Fm	163.5	164.15	True	637.4	Mesozoic
818	30340	Santiago	10.1130/B31065.1	174.4	6.0	181.0	8.2	267.9	82.0	65.09891750653229	sandstone	sedimentary	208	6392	1543	Santiago Fm	32.45	47.8	True	174.4
819	28641	OS0884	10.1130/G31335.1	2042.7	66.8	2056.7	35.2	2070.8	20.6	98.6430365076299	metasedimentary	metamorphic	491	15025	3995	Vishnu Schist	1690.0	1887.5	True	2070.8
820	35327	TD1F105	10.1130/G33746.1	60.8	7.4	64.5	14.0				sandstone	sedimentary	251	6864	1743	Lower Markley Sandstone Mbr	40.425	42.925	True	60.8
821	35327	TD1F105	10.1130/G33746.1	60.8	7.4	64.5	14.0				sandstone	sedimentary	251	6862	1743	Upper Markley Sandstone Mbr	37.8	38.675	True	60.8
822	35114	JL21B	10.1144/0016-76492008-088	602.0	17.6	682.6	39.4	937.0	54.6	64.24759871931697	siltstone	sedimentary	588	18435	4751	Conception	579.625	618.25	False	602.0
823	42885	C-86116	10.1139/E10-006	2649.0	82.0	2674.0	40.0	2693.0	36.0	98.36613442257705	sandstone	sedimentary	1541	35486	8934	Isachsen Fm	116.0	126.1	True	2693.0	Mesozoic
824	41552	61206-1	10.2475/05.2010.01	1053.6	32.4			1047.0	114.0	100.63037249283668	quartzite	metamorphic	377	10409	2689	Waits River Fm	412.9	424.1	True	1053.6	Paleozoic*
825	37267	5PL13	10.1130/L557.1	1074.0	24.0	1080.0	37.0	1091.0	99.0	98.44179651695693	sandstone	sedimentary	325	8774	2216	Jefferson Fm	366.8	386.45	True	1074.0	Paleozoic*
826	43167	BENYON-247	10.2110/jsr.2014.16	1476.7	55.4	1476.8	50.4	1476.9	93.4	99.98645812174149	sandstone	sedimentary	1625	37218	9542	McMurray Fm	111.75	125.0	True	1476.7	Mesozoic
827	29096	CS12-5	10.1130/B30884.1	1342.0	34.0	1360.0	25.0	1391.0	19.0	96.47735442127966	sandstone	sedimentary	57	2075	10064	Van Horn Sandstone	515.19	519.6	True	1391.0	Cambrian
828	29120	XOM-MDB-05	10.1130/G35513.1	1580.7	32.4	1615.7	19.0	1661.6	7.6	95.13119884448724	sandstone	sedimentary	526	16848	4323	Lower Frio Mbr	26.8325	27.4663	True	1661.6	Cenozoic
829	29120	XOM-MDB-05	10.1130/G35513.1	1580.7	32.4	1615.7	19.0	1661.6	7.6	95.13119884448724	sandstone	sedimentary	526	16847	4323	Middle Frio Mbr	24.9313	26.8325	True	1661.6	Cenozoic
830	29120	XOM-MDB-05	10.1130/G35513.1	1580.7	32.4	1615.7	19.0	1661.6	7.6	95.13119884448724	sandstone	sedimentary	526	16846	4323	Upper Frio Mbr	24.2975	24.9313	True	1661.6	Cenozoic
831	43186	TRU	10.2110/jsr.2008.088	1502.6	12.4	1559.2	37.8	1637.0	6.0	91.78985949908369	sandstone	sedimentary	71	2538	461	Trujillo Fm	227.0	237.0	False	1637.0
832	45380	K05771	10.1016/j.precamres.2017.03.006	1610.5	42.8	1652.3	29.4	1705.9	36.8	94.40764405885456	sandstone	sedimentary	491	36863	3996	Hotauta Conglomerate	1250.0	1254.0	True	1705.9
833	45380	K05771	10.1016/j.precamres.2017.03.006	1610.5	42.8	1652.3	29.4	1705.9	36.8	94.40764405885456	sandstone	sedimentary	491	36862	3996	Bass Limestone	1244.0	1250.0	True	1705.9
834	45380	K05771	10.1016/j.precamres.2017.03.006	1610.5	42.8	1652.3	29.4	1705.9	36.8	94.40764405885456	sandstone	sedimentary	491	36861	3996	Hakatai Shale	1180.0	1244.0	True	1705.9
835	45380	K05771	10.1016/j.precamres.2017.03.006	1610.5	42.8	1652.3	29.4	1705.9	36.8	94.40764405885456	sandstone	sedimentary	491	36860	3996	Shinumo Quartzite	1140.0	1180.0	True	1705.9
836	45380	K05771	10.1016/j.precamres.2017.03.006	1610.5	42.8	1652.3	29.4	1705.9	36.8	94.40764405885456	sandstone	sedimentary	491	36859	3996	Dox Sandstone	1108.0	1140.0	True	1705.9
837	45380	K05771	10.1016/j.precamres.2017.03.006	1610.5	42.8	1652.3	29.4	1705.9	36.8	94.40764405885456	sandstone	sedimentary	491	36858	3996	Cardenas lavas	1100.0	1108.0	True	1705.9
838	29941	CG11-7	10.1130/GES00917.1	763.0	29.0	778.0	34.0	744.9	102.2	102.42985635655793	sandstone	sedimentary	523	16618	4300	Sparta Fm	40.1333	40.7167	True	763.0	Cenozoic
839	28731	6137	10.1130/B30260.1	193.4	9.2			269.0	74.4	71.89591078066914	sandstone	sedimentary	290	7511	1980	Keller Creek Shale	192.925	201.3	True	193.4
840	28634	K06246	10.1130/G31335.1	1781.7	26.4	1790.2	18.8	1800.2	26.6	98.97233640706588	metasedimentary	metamorphic	484	14829	3938	Vishnu Schist	1690.0	1887.5	True	1781.7
841	43199	CP38	10.2110/jsr.2008.088	238.7	12.9	218.7	48.9	8.3	585.3	2875.9036144578313	sandstone	sedimentary	491	15048	4002	Chinle Fm	201.3	232.0	True	238.7
842	29195	51104	10.1130/B30999.1	1627.7	89.7	1656.6	63.9	1693.3	86.9	96.12590799031477	sandstone	sedimentary	513	15943	4217	Frontier Fm	95.022	100.5	True	1693.3	Mesozoic
843	38244	EI2-116	10.1111/ter.12207	1600.0	39.0	1632.0	35.0	1674.0	116.0	95.57945041816009	sandstone	sedimentary	1509	34836	8759	Nauyat	1266.0	1276.0	True	1600.0
844	30879	TMS005	http://digitalscholarship.unlv.edu/thesesdissertations/1522/	260.7	3.8	257.1	23.2	224.2	234.0	116.28010704727922	sandstone	sedimentary	468	14065	3728	Muddy Creek Fm	5.333	11.62	True	260.7
845	28676	05SP14-20	10.1130/B30029.1	1685.7	53.3	1677.9	38.1	1668.2	54.4	101.04903488790313	conglomerate	sedimentary	465	13948	3704	Sheep Pass Fm	34.875	46.175	True	1685.7	Cenozoic
846	28997	09AnJ11a	10.1130/B30818.1	169.0	20.0	161.0	50.0				sandstone	sedimentary	413	11096	2971	Valdez Gp	67.525	83.6	True	169.0
847	42831	JL2	10.1139/E09-065	2725.4	17.0	2760.9	26.8	2765.3	24.4	98.55711857664629	sandstone	sedimentary	1480	34196	8485	Jones Lake Fm	243.3	251.3	False	2725.4
848	29189	XOM-MDB-79	10.1130/G35513.1	1691.2	28.0	1686.9	15.8	1681.5	7.0	100.57686589354743	sandstone	sedimentary	518	16247	4268	Frio Fm	24.2975	28.1	True	1681.5	Cenozoic
849	34005	TB3	10.1130/L451.1	289.9	6.0	305.0	14.0	417.0	110.0	69.52038369304556	conglomerate	sedimentary	1454	33654	8226	Tantalus	126.1	150.325	True	289.9
850	28677	06MR19	10.1130/B30029.1	1906.7	35.9	1924.9	23.4	1944.6	29.0	98.0510130618122	limestone	sedimentary	465	13948	3704	Sheep Pass Fm	34.875	46.175	True	1944.6	Cenozoic
851	34017	CO13-Ec-3Jw	10.1130/L467.1	1459.6	28.2	1447.4	17.0	1429.4	8.6	102.11277459073737	sandstone	sedimentary	494	15144	4022	Wanakah Fm	167.75	168.3	True	1429.4	Mesozoic
852	30326	SG-22	10.1130/B31065.1	85.9	2.6						sandstone	sedimentary	561	17795	4624	Lodo Fm	58.6667	59.2	True	85.9
853	29154	XOM-MDB-43	10.1130/G35513.1	1025.9	17.6	1046.7	17.6	1090.3	39.0	94.09336879757865	sandstone	sedimentary	451	13078	3452	Wilcox Fm	49.85	56.8	True	1025.9	Cenozoic
854	40705	TI10-03	10.2475/06.2015.02	70.3	13.2	63.6	53.6				sandstone	sedimentary	413	11097	2972	Orca Gp	53.95	64.9	True	70.3
855	29937	CG11-3	10.1130/GES00917.1	68.4	1.4	65.8	5.9				sandstone	sedimentary	523	16621	4300	Wilcox Gp	49.85	58.4	True	68.4
856	42909	FCB-D3	http://ir.uiowa.edu/etd/3119	976.0	26.0	975.0	30.6	973.0	80.0	100.30832476875642	sandstone	sedimentary	80	2986	581	Cherokee Gp	310.5	317.25	True	976.0	Paleozoic*
857	43651	C-054337	10.1144/jgs2014-027	1407.0	37.0	1427.0	45.0	1484.0	67.0	94.81132075471699	sandstone	sedimentary	1562	35765	9021	Danish River Fm	427.4	438.5	True	1407.0	Paleozoic*
858	40365	EL2	10.1139/E06-010					2402.0	14.0		siliciclastic	sedimentary	195	6221	1492	Enchantment Lake Fm	2371.426	2435.713	True	2402.0
859	34565	767-1	10.1130/B26399.1	108.1	3.8						greywacke	sedimentary	243	6852	1738	Franciscan Subduction Complex	59.2	153.4	True	108.1
860	37460	H	10.1130/GES01313.1	2930.6	56.8	2928.4	50.5	2927.1	79.4	100.1195722728981	sandstone	sedimentary	520	16419	4285	Hooper Mbr	56.8	58.1333	True	2930.6	Cenozoic
861	33950	12MP57	10.1130/L475.1	588.4	9.7	585.1	9.1	572.4	24.3	102.79524807826695	conglomerate	sedimentary	425	11187	3018	Descon Fm	407.6	470.0	True	588.4	Paleozoic*
862	45604	K065715	https://doi.org/10.1130/B31532.1	1173.0	32.0	1186.0	46.0	1210.0	59.8	96.94214876033058	sandstone	sedimentary	491	36852	9433	Carbon Butte Member	736.8	742.4	True	1173.0
863	42905	FCB-A2	http://ir.uiowa.edu/etd/3119	1323.0	29.0	1341.0	25.6	1371.0	47.0	96.49890590809628	sandstone	sedimentary	90	3423	691	Cherokee Gp	311.0	319.0	True	1323.0	Paleozoic*
864	34014	CO13-Ec-1Jmt	10.1130/L467.1	936.4	17.1	938.8	12.4	944.6	9.4	99.13190768579292	sandstone	sedimentary	500	15412	4091	Morrison Fm	150.325	157.3	True	944.6	Mesozoic
865	28503	CP3	10.1130/G30684.1	996.0	64.4	992.0	84.0	997.6	56.4	99.83961507618284	sandstone	sedimentary	479	14623	3884	Navajo Sandstone	170.3	201.3	True	997.6	Mesozoic
866	37462	Q	10.1130/GES01313.1	982.3	63.2	991.8	49.5	1012.4	72.4	97.02686685104702	sandstone	sedimentary	520	16412	4285	Queen City Fm	42.925	46.175	True	982.3	Cenozoic
867	43189	CP4	10.2110/jsr.2008.088	1753.4	123.2	1797.3	94.8	1849.0	74.0	94.82963764196863	sandstone	sedimentary	502	15475	4108	Chinle Fm	228.6667	230.3333	True	1849.0	Mesozoic
868	33302	Mol9-7	http://www.scielo.org.mx/pdf/rmcg/v31n3/v31n3a8.pdf	1274.9	74.6	1249.9	54.2	1207.2	77.0	105.60801855533467	paragneiss	metamorphic	1419	33215	7745	Huiznopala Fm	1000.0	1200.0	True	1274.9
869	28868	REN108	http://specialpapers.gsapubs.org/content/487/63.abstract	79.0	1.0	71.5	8.2				sandstone	sedimentary	332	9034	2282	Renova Fm	23.03	38.675	True	79.0
870	40692	11SJO-34	10.2475/06.2015.02	70.1	17.4	98.7	72.0	860.9	1548.8	8.142641421767918	sandstone	sedimentary	414	11105	2979	Sitkalidak Fm	32.595	42.925	True	70.1
871	29200	51204	10.1130/B30999.1	1729.4	27.2	1711.9	19.8	1690.5	29.2	102.30109435078379	sandstone	sedimentary	481	14708	3905	Kelvin Fm	103.625	141.1	True	1729.4	Mesozoic
872	28861	CLA608	http://specialpapers.gsapubs.org/content/487/63.abstract	81.4	0.4	91.5	16.9	361.9	440.0	22.492401215805472	sandstone	sedimentary	332	9034	2282	Renova Fm	23.03	38.675	True	81.4
873	42887	C-100614	10.1139/E10-006	1889.0	44.0	1902.0	26.0	1917.0	22.0	98.5393844548774	sandstone	sedimentary	1535	35351	8902	Isachsen Fm	113.0	126.1	True	1917.0	Mesozoic
874	29129	XOM-MDB-14	10.1130/G35513.1	1116.2	35.6	1139.0	24.4	1182.6	16.4	94.38525283274141	sandstone	sedimentary	527	16912	4331	Nanafalia Fm	56.8	58.1333	True	1182.6	Cenozoic
875	29129	XOM-MDB-14	10.1130/G35513.1	1116.2	35.6	1139.0	24.4	1182.6	16.4	94.38525283274141	sandstone	sedimentary	527	16911	4331	Tuscahoma Fm	54.975	56.8	True	1182.6	Cenozoic
876	29129	XOM-MDB-14	10.1130/G35513.1	1116.2	35.6	1139.0	24.4	1182.6	16.4	94.38525283274141	sandstone	sedimentary	527	16910	4331	Bashi Fm	53.95	54.975	True	1182.6	Cenozoic
877	29129	XOM-MDB-14	10.1130/G35513.1	1116.2	35.6	1139.0	24.4	1182.6	16.4	94.38525283274141	sandstone	sedimentary	527	16909	4331	Hatchetigbee Fm	52.925	53.95	True	1182.6	Cenozoic
878	28997	09AnJ11a	10.1130/B30818.1	1870.0	36.0	1863.0	20.0	1856.0	22.0	100.75431034482759	sandstone	sedimentary	413	11096	2971	Valdez Gp	67.525	83.6	True	1856.0	Mesozoic
879	40789	NHZ	10.2475/10.2012.01	1004.3	10.6			1035.0	38.0	97.03381642512078	quartzite	metamorphic	384	10532	2734	Massabesic Gneiss	443.8	477.7	True	1004.3	Paleozoic*
880	43188	CUR	10.2110/jsr.2008.088	854.5	61.6	918.2	70.3	1074.7	175.2	79.51056108681493	sandstone	sedimentary	462	13759	3653	Chinle Fm	201.3	234.5	True	854.5	Mesozoic
881	28680	06SP29-30	10.1130/B30029.1	1251.5	13.1	1257.3	11.4	1267.1	21.3	98.76884223818168	siltstone	sedimentary	465	13948	3704	Sheep Pass Fm	34.875	46.175	True	1251.5	Cenozoic
882	28688	3-26-04-23	10.1130/B30206.1	1618.0	156.2	1658.9	92.4	1711.0	53.6	94.5645821157218	sandstone	sedimentary	35	2899	528	McCoy Mountains Fm	116.0	168.8	True	1711.0	Mesozoic
883	34753	96DH102	10.1029/2005TC001830	557.0	22.0	541.0	89.0				sandstone	sedimentary	98	5246	1234	Ivishak Fm	245.9	250.7265	True	557.0	Mesozoic
884	35327	TD1F105	10.1130/G33746.1	116.1	8.6	122.0	40.4				sandstone	sedimentary	251	6864	1743	Lower Markley Sandstone Mbr	40.425	42.925	True	116.1
885	35327	TD1F105	10.1130/G33746.1	116.1	8.6	122.0	40.4				sandstone	sedimentary	251	6862	1743	Upper Markley Sandstone Mbr	37.8	38.675	True	116.1
886	34895	21-CRT0806-12	10.1130/GES00982.1	1857.1	86.0	1866.4	53.2	1876.7	57.8	98.9556135770235	sandstone	sedimentary	490	14987	3988	Bidahochi Fm	2.588	5.333	True	1876.7	Cenozoic
887	29062	GE0110	10.1130/B30824.1	99.4	9.2	101.6	16.4	153.3	330.2	64.84018264840182	sandstone	sedimentary	515	16010	4229	Muddy Sandstone Mbr	125.0	126.1	True	99.4
888	34410	Rome1	10.1130/G20727.1	1914.0	136.0	2292.0	490.0	2649.0	14.0	72.25368063420159	sandstone	sedimentary	7	115	39	Rome Fm	511.0	514.75	True	2649.0	Cambrian
889	34753	96DH102	10.1029/2005TC001830	529.0	9.0	551.0	30.0				sandstone	sedimentary	98	5246	1234	Ivishak Fm	245.9	250.7265	True	529.0
890	29126	XOM-MDB-11	10.1130/G35513.1	566.6	44.6	567.3	93.6	570.0	433.6	99.40350877192982	sandstone	sedimentary	524	16740	4314	Wilcox Gp	49.85	58.4	True	566.6	Cenozoic
891	37468	OK-1	10.1130/GES01316.1	1756.1	15.1	1753.8	9.2	1751.0	9.2	100.29126213592232	sandstone	sedimentary	158	5568	1306	Pontotoc Gp	282.0	300.1	True	1751.0	Paleozoic*
892	29325	12WI6	10.1130/B31142.1	1096.3	29.0	1104.8	49.2	1121.6	134.2	97.74429386590585	dolomite	sedimentary	459	13633	3603	Reed Dolomite	559.8	573.9	True	1096.3
893	45382	JM16-77-1	10.1016/j.precamres.2017.03.006	1703.9	68.2	1718.7	39.4	1736.8	25.2	98.10571165361584	sandstone	sedimentary	491	36863	3996	Hotauta Conglomerate	1250.0	1254.0	True	1736.8
894	45382	JM16-77-1	10.1016/j.precamres.2017.03.006	1703.9	68.2	1718.7	39.4	1736.8	25.2	98.10571165361584	sandstone	sedimentary	491	36862	3996	Bass Limestone	1244.0	1250.0	True	1736.8
895	45382	JM16-77-1	10.1016/j.precamres.2017.03.006	1703.9	68.2	1718.7	39.4	1736.8	25.2	98.10571165361584	sandstone	sedimentary	491	36861	3996	Hakatai Shale	1180.0	1244.0	True	1736.8
896	45382	JM16-77-1	10.1016/j.precamres.2017.03.006	1703.9	68.2	1718.7	39.4	1736.8	25.2	98.10571165361584	sandstone	sedimentary	491	36860	3996	Shinumo Quartzite	1140.0	1180.0	True	1736.8
897	45382	JM16-77-1	10.1016/j.precamres.2017.03.006	1703.9	68.2	1718.7	39.4	1736.8	25.2	98.10571165361584	sandstone	sedimentary	491	36859	3996	Dox Sandstone	1108.0	1140.0	True	1736.8
898	45382	JM16-77-1	10.1016/j.precamres.2017.03.006	1703.9	68.2	1718.7	39.4	1736.8	25.2	98.10571165361584	sandstone	sedimentary	491	36858	3996	Cardenas lavas	1100.0	1108.0	True	1736.8
899	34458	14LB03	10.1130/B25896.1	11.8	0.8						sandstone	sedimentary	294	7477	1973	Grassy Mountain Fm	5.333	11.895	True	11.8
900	30884	TMS012	http://digitalscholarship.unlv.edu/thesesdissertations/1522/	1015.3	12.0	1004.2	23.2	979.9	69.0	103.61261353199306	sandstone	sedimentary	468	14065	3728	Muddy Creek Fm	5.333	11.62	True	1015.3	Cenozoic
901	40690	11CD-60	10.2475/06.2015.02	65.9	2.4	65.1	10.4	36.1	388.6	182.54847645429362	sandstone	sedimentary	414	11107	2980	Ghost Rocks Fm	62.7	66.0	True	65.9
902	28575	T1	10.1130/B30120.1	2601.2	48.4	2556.3	38.9	2523.9	41.2	103.06272039304251	sandstone	sedimentary	1657	38191	9877	Imperial Fm	362.225	382.7	True	2523.9	Paleozoic*
903	45381	JM16-77-2	10.1016/j.precamres.2017.03.006	1262.6	52.0	1245.1	33.6	1215.0	22.4	103.91769547325103	sandstone	sedimentary	491	36863	3996	Hotauta Conglomerate	1250.0	1254.0	True	1215.0
904	45381	JM16-77-2	10.1016/j.precamres.2017.03.006	1262.6	52.0	1245.1	33.6	1215.0	22.4	103.91769547325103	sandstone	sedimentary	491	36862	3996	Bass Limestone	1244.0	1250.0	True	1215.0
905	45381	JM16-77-2	10.1016/j.precamres.2017.03.006	1262.6	52.0	1245.1	33.6	1215.0	22.4	103.91769547325103	sandstone	sedimentary	491	36861	3996	Hakatai Shale	1180.0	1244.0	True	1215.0
906	45381	JM16-77-2	10.1016/j.precamres.2017.03.006	1262.6	52.0	1245.1	33.6	1215.0	22.4	103.91769547325103	sandstone	sedimentary	491	36860	3996	Shinumo Quartzite	1140.0	1180.0	True	1215.0
907	45381	JM16-77-2	10.1016/j.precamres.2017.03.006	1262.6	52.0	1245.1	33.6	1215.0	22.4	103.91769547325103	sandstone	sedimentary	491	36859	3996	Dox Sandstone	1108.0	1140.0	True	1215.0
908	45381	JM16-77-2	10.1016/j.precamres.2017.03.006	1262.6	52.0	1245.1	33.6	1215.0	22.4	103.91769547325103	sandstone	sedimentary	491	36858	3996	Cardenas lavas	1100.0	1108.0	True	1215.0
909	28743	09ANJ34	10.1130/L131.1	164.2	4.4	161.1	9.4				sandstone	sedimentary	413	11096	2971	Valdez Gp	67.525	83.6	True	164.2
910	42886	C-072382	10.1139/E10-006	1079.0	12.0	1094.0	16.0	1124.0	40.0	95.99644128113879	sandstone	sedimentary	1562	35779	9012	Isachsen Fm	113.0	126.1	True	1079.0	Mesozoic
911	34460	15LB03	10.1130/B25896.1	78.2	2.6						sandstone	sedimentary	294	7482	1973	Sucker Creek Fm	13.82	15.4325	True	78.2
912	28508	UT0711	10.1130/G30684.1	1619.6	63.6	1617.9	49.4	1615.8	77.8	100.2351776209927	conglomerate	sedimentary	482	14737	3914	Indianola Gp	83.6	145.0	True	1619.6	Mesozoic
913	29163	XOM-MDB-53	10.1130/G35513.1	1661.8	34.6	1665.2	20.4	1669.4	15.2	99.5447466155505	sandstone	sedimentary	521	16461	4289	Dexter Sand	95.319	96.9756	True	1669.4	Mesozoic
914	35703	11RMSS5	10.1016/j.precamres.2014.06.005	1523.4	72.0	1665.6	45.0	1849.8	26.8	82.35484917288356	greywacke	sedimentary	464	13874	3691	Beck Spring Dolomite	677.5	686.0	False	1849.8
915	35700	Samp_07	10.1016/j.sedgeo.2005.07.014	1111.7	27.0	1142.6	91.6	1201.7	37.8	92.51060996921028	sandstone	sedimentary	9	137	47	Pottsville Fm	322.15	323.2	True	1111.7	Paleozoic*
916	29105	XOM-AOS-06	10.1130/G35513.1	174.2	10.2	146.7	62.4				sandstone	sedimentary	1625	37219	9542	Clearwater Fm	110.5	111.75	True	174.2
917	42907	FCB-D1	http://ir.uiowa.edu/etd/3119	1076.0	28.2	1066.0	32.6	1045.0	81.0	102.96650717703349	sandstone	sedimentary	90	3423	691	Cherokee Gp	311.0	319.0	True	1076.0	Paleozoic*
918	28874	07SD3a	10.1130/B30657.1	1268.0	32.0	1270.0	32.0	1272.0	68.0	99.68553459119497	sandstone	sedimentary	55	2029	313	Bliss Fm	483.475	493.575	True	1268.0	Cambrian
919	28856	90707	http://specialpapers.gsapubs.org/content/487/13.abstract	1678.5	8.0	1674.7	6.5	1669.8	10.7	100.52102048149479	sandstone	sedimentary	490	15003	3990	Chinle Fm	201.3	232.0	True	1678.5	Mesozoic
920	37782	08-164	http://ir.uiowa.edu/etd/3496/	640.0	22.0	641.0	20.0	644.0	44.0	99.37888198757764	greywacke	sedimentary	1560	35737	9001	Danish River Fm	427.4	438.5	True	640.0	Paleozoic*
921	33947	12MP54	10.1130/L475.1	418.6	5.7	417.2	14.2	409.4	87.3	102.24719101123596	sandstone	sedimentary	425	11184	3018	Karheen Fm	387.7	412.9	True	418.6
922	29127	XOM-MDB-12	10.1130/G35513.1	1037.6	34.8	1045.3	50.0	1061.3	136.0	97.76688966362009	sandstone	sedimentary	527	16912	4331	Nanafalia Fm	56.8	58.1333	True	1037.6	Cenozoic
923	29127	XOM-MDB-12	10.1130/G35513.1	1037.6	34.8	1045.3	50.0	1061.3	136.0	97.76688966362009	sandstone	sedimentary	527	16911	4331	Tuscahoma Fm	54.975	56.8	True	1037.6	Cenozoic
924	29127	XOM-MDB-12	10.1130/G35513.1	1037.6	34.8	1045.3	50.0	1061.3	136.0	97.76688966362009	sandstone	sedimentary	527	16910	4331	Bashi Fm	53.95	54.975	True	1037.6	Cenozoic
925	29127	XOM-MDB-12	10.1130/G35513.1	1037.6	34.8	1045.3	50.0	1061.3	136.0	97.76688966362009	sandstone	sedimentary	527	16909	4331	Hatchetigbee Fm	52.925	53.95	True	1037.6	Cenozoic
926	28861	CLA608	http://specialpapers.gsapubs.org/content/487/63.abstract	84.1	1.8	69.0	32.6				sandstone	sedimentary	332	9034	2282	Renova Fm	23.03	38.675	True	84.1
927	29172	XOM-MDB-62	10.1130/G35513.1	30.6	4.6	33.1	22.4	221.3	1599.2	13.827383642114777	sandstone	sedimentary	518	16247	4268	Frio Fm	24.2975	28.1	True	30.6
928	29178	XOM-MDB-68	10.1130/G35513.1	594.3	11.8	594.1	10.0	593.1	17.6	100.2023267577137	sand	sedimentary	159	5588	1310	Strawn Gp	306.0	312.0	True	594.3	Paleozoic*
929	29055	EB0310	10.1130/B30824.1	2466.0	96.4	2446.5	47.4	2430.3	34.6	101.46895445006788	sandstone	sedimentary	515	15985	4229	Fort Union Fm	50.5333	66.0	True	2430.3	Mesozoic
930	28680	06SP29-30	10.1130/B30029.1	3663.5	192.1	3650.0	72.8	3642.6	40.3	100.57376599132488	siltstone	sedimentary	465	13948	3704	Sheep Pass Fm	34.875	46.175	True	3642.6	Cenozoic
931	28878	08FM9	10.1130/B30657.1	487.0	40.0	530.0	62.0	720.0	264.0	67.63888888888889	arkose	sedimentary	52	1873	281	Bliss Fm	483.475	493.575	True	487.0
932	32526	102-98-744	10.1016/j.precamres.2013.09.012					2817.0	8.8		sandstone	sedimentary	776	22250	6173	Island Lake Gp unnamed 1	2710.0	2740.0	True	2817.0
933	32526	102-98-744	10.1016/j.precamres.2013.09.012					2817.0	8.8		sandstone	sedimentary	776	22249	6173	Island Lake Gp unnamed 2	2680.0	2710.0	True	2817.0
934	29177	XOM-MDB-67	10.1130/G35513.1	2486.8	42.0	2505.8	21.6	2521.2	18.6	98.63557036331906	sandstone	sedimentary	520	16415	4285	Wilcox Fm	49.85	53.2667	True	2521.2	Cenozoic
935	28680	06SP29-30	10.1130/B30029.1	2026.3	33.9	2026.6	24.7	2026.9	36.0	99.97039814495042	siltstone	sedimentary	465	13948	3704	Sheep Pass Fm	34.875	46.175	True	2026.3	Cenozoic
936	37470	OK-4	10.1130/GES01316.1	432.5	3.0	424.9	10.6	383.7	66.8	112.71826948136565	sandstone	sedimentary	158	5567	1306	Wellington Fm	279.7375	282.0	True	432.5
937	29113	XOM-AOS-22	10.1130/G35513.1	1855.7	81.6	1849.6	45.2	1842.7	29.6	100.70548651435394	sandstone	sedimentary	1625	37218	9542	McMurray Fm	111.75	125.0	True	1842.7	Mesozoic
938	30844	08MC09	http://digitalscholarship.unlv.edu/thesesdissertations/145	639.5	20.4	632.7	64.4	608.5	287.2	105.09449465899753	sandstone	sedimentary	468	14065	3728	Muddy Creek Fm	5.333	11.62	True	639.5	Cenozoic
939	40670	LB4	10.1306/10191515029	908.7	40.6	924.9	30.8	964.0	34.2	94.26348547717842	sandstone	sedimentary	1625	37218	9542	McMurray Fm	111.75	125.0	True	964.0	Mesozoic
940	29065	MH0110	10.1130/B30824.1	98.1	4.4	95.6	19.2	33.1	493.2	296.3746223564955	sandstone	sedimentary	515	15991	4229	Mowry Shale	100.5	125.0	True	98.1
941	28672	04LC4	10.1130/B30029.1	1011.7	24.5	1012.9	20.1	1015.5	34.9	99.62580009847366	conglomerate	sedimentary	465	13948	3704	Sheep Pass Fm	34.875	46.175	True	1011.7	Cenozoic
942	34083	11243	10.1130/L517.1	2496.8	72.6			2501.7	19.4	99.80413318943118	sandstone	sedimentary	1545	35561	8952	Bjorne Fm	247.2	251.6755	True	2501.7	Mesozoic
943	35320	JW-290	10.1130/G33746.1	103.0	10.1	108.6	30.5				sandstone	sedimentary	266	7121	1825	Tyee Fm	45.6334	46.7166	True	103.0
944	34918	44-FC06-2	10.1130/GES00982.1	1741.7	100.2	1714.7	57.6	1682.0	41.8	103.54934601664685	sandstone	sedimentary	825	22959	6465	Diablo Fm of Palm Spring Gp	2.588	4.0333	True	1682.0	Cenozoic
945	30832	5CS06	http://www.mbmg.mtech.edu/pdf-open-files/mbmg569/mbmg569.pdf	70.0	4.0						sandstone	sedimentary	332	9034	2282	Renova Fm	23.03	38.675	True	70.0
946	30310	GVG09-15	10.1130/B31065.1	1747.4	38.0	1724.8	23.2	1697.5	23.8	102.93961708394698	sandstone	sedimentary	252	6880	1748	Deer Valley Fm	66.0	67.525	True	1697.5	Mesozoic
947	42628	MS3	10.1086/669230	1427.3	13.7	1434.0	10.3	1443.8	15.3	98.85718243524033	sandstone	sedimentary	187	6133	6345	Mt Simon Fm	498.375	499.95	True	1427.3	Cambrian
948	35703	11RMSS5	10.1016/j.precamres.2014.06.005	1452.9	33.6	1431.9	25.0	1400.8	37.6	103.7193032552827	greywacke	sedimentary	464	13874	3691	Beck Spring Dolomite	677.5	686.0	True	1452.9
949	29040	BH0110	10.1130/B30824.1	95.8	11.0	92.2	22.6				sandstone	sedimentary	515	15990	4229	Frontier Fm	95.022	100.5	True	95.8
950	34014	CO13-Ec-1Jmt	10.1130/L467.1	2030.6	26.3	2035.0	14.7	2039.6	12.6	99.55873700725633	sandstone	sedimentary	500	15412	4091	Morrison Fm	150.325	157.3	True	2039.6	Mesozoic
951	29324	12WI5	10.1130/B31142.1	2541.0	77.8	2546.4	35.2	2550.6	12.6	99.62361797224183	argillite	sedimentary	459	13634	3603	Wyman Fm	573.9	583.3	True	2550.6
952	42086	C	10.1016/S0037-0738(03)00158-1	940.0	53.0	986.0	41.0	1089.0	28.0	86.31772268135904	sandstone	sedimentary	483	14781	3928	Glen Canyon Gp	170.3	201.3	True	1089.0	Mesozoic
953	34752	94CL53	10.1029/2005TC001830	232.0	14.0	219.0	82.0				sandstone	sedimentary	155	5367	1272	Otuk Fm	168.8	247.2	True	232.0
954	37781	08-209	http://ir.uiowa.edu/etd/3496/	444.0	30.0	458.0	34.0	527.0	122.0	84.25047438330171	conglomerate	sedimentary	1571	35874	9069	Cranstone Fm	438.5	443.8	True	444.0
955	37456	CBBS	10.1130/GES01313.1	94.3	5.5	104.2	7.8	335.9	129.4	28.073831497469484	sandstone	sedimentary	520	16417	4285	Calvert Bluff Fm	54.6333	56.0	False	94.3
956	29180	XOM-MDB-70	10.1130/G35513.1	1724.1	55.0	1717.8	31.0	1710.1	15.4	100.81866557511258	sandstone	sedimentary	520	16415	4285	Wilcox Fm	49.85	53.2667	True	1710.1	Cenozoic
957	34752	94CL53	10.1029/2005TC001830	307.0	4.0	264.0	58.0				sandstone	sedimentary	155	5367	1272	Otuk Fm	168.8	247.2	True	307.0
958	35113	JL20A	10.1144/0016-76492008-088	578.1	16.8	588.7	22.2	592.2	31.8	97.61904761904762	sandstone	sedimentary	588	18435	4751	Conception	579.625	618.25	True	578.1
959	28701	Kaibab	10.1130/L121.1	384.0	10.0	381.0	20.0	367.0	124.0	104.63215258855585	sandstone	sedimentary	491	15033	4000	Kaibab Limestone	262.5625	269.4875	True	384.0
960	34013	CO13-Ec-1JEEF	10.1130/L467.1	597.3	11.7	599.7	27.5	608.8	123.8	98.11103810775296	sandstone	sedimentary	494	15144	4022	Wanakah Fm	167.75	168.3	True	597.3	Mesozoic
961	40366	StQ2	10.1139/E06-010					2315.0	18.0		quartzite	metamorphic	196	6242	1498	Fern Creek Fm	2113.0	2140.0	True	2315.0
962	40366	StQ2	10.1139/E06-010					2315.0	18.0		quartzite	metamorphic	196	6241	1498	Sturgeon Quartzite	2059.0	2113.0	True	2315.0
963	40366	StQ2	10.1139/E06-010					2315.0	18.0		quartzite	metamorphic	196	6240	1498	Randville Dolomite	2032.0	2059.0	True	2315.0
964	42905	FCB-A2	http://ir.uiowa.edu/etd/3119	997.0	31.2	1006.0	27.6	1027.0	54.4	97.07887049659202	sandstone	sedimentary	90	3423	691	Cherokee Gp	311.0	319.0	True	997.0	Paleozoic*
965	28856	90707	http://specialpapers.gsapubs.org/content/487/13.abstract	228.3	1.1	228.2	4.1	226.2	45.4	100.92838196286472	sandstone	sedimentary	490	15003	3990	Chinle Fm	201.3	232.0	True	228.3
966	29055	EB0310	10.1130/B30824.1	609.5	18.0	623.0	60.6	672.6	270.2	90.61849539101992	sandstone	sedimentary	515	15985	4229	Fort Union Fm	50.5333	66.0	True	609.5	Mesozoic
967	33950	12MP57	10.1130/L475.1	580.8	13.3	577.1	43.4	562.9	208.8	103.17996091668147	conglomerate	sedimentary	425	11187	3018	Descon Fm	407.6	470.0	True	580.8	Paleozoic*
968	40708	JG10-02	10.2475/06.2015.02	1389.9	21.4	1390.5	13.4	1391.4	9.2	99.89219491159983	sandstone	sedimentary	416	11129	2990	Valdez Gp	66.0	100.5	True	1391.4	Mesozoic
969	40661	KE3	10.1306/10191515029	2797.5	54.8	2786.0	24.2	2777.7	13.0	100.71281995895885	sandstone	sedimentary	1625	37218	9542	McMurray Fm	111.75	125.0	True	2777.7	Mesozoic
970	29205	51209	10.1130/B30999.1	1109.5	34.0	1112.7	30.7	1119.0	61.5	99.15102770330653	sandstone	sedimentary	504	15543	4128	Ericson Sandstone	81.6833	89.8	True	1109.5	Mesozoic
971	28508	UT0711	10.1130/G30684.1	1411.4	25.4	1418.5	39.0	1429.0	89.8	98.76836948915326	conglomerate	sedimentary	482	14737	3914	Indianola Gp	83.6	145.0	True	1411.4	Mesozoic
972	33950	12MP57	10.1130/L475.1	567.3	11.7	572.6	10.1	593.5	18.6	95.5855096882898	conglomerate	sedimentary	425	11187	3018	Descon Fm	407.6	470.0	True	567.3	Paleozoic*
973	34915	41-FC127	10.1130/GES00982.1	1409.1	50.0	1428.8	33.0	1458.3	33.0	96.6262085990537	sandstone	sedimentary	222	6547	1598	Imperial Fm	3.347	4.0333	True	1458.3	Cenozoic
974	32526	102-98-744	10.1016/j.precamres.2013.09.012					2828.3	8.5		sandstone	sedimentary	776	22250	6173	Island Lake Gp unnamed 1	2710.0	2740.0	True	2828.3
975	32526	102-98-744	10.1016/j.precamres.2013.09.012					2828.3	8.5		sandstone	sedimentary	776	22249	6173	Island Lake Gp unnamed 2	2680.0	2710.0	True	2828.3
976	29182	XOM-MDB-72	10.1130/G35513.1	55.9	1.8	53.8	12.6				sandstone	sedimentary	521	16441	4287	Wilcox Gp	49.85	58.4	True	55.9
977	29050	DB0110	10.1130/B30824.1	102.4	9.6	98.8	12.8	13.4	234.2	764.179104477612	sandstone	sedimentary	515	15990	4229	Frontier Fm	95.022	100.5	True	102.4
978	29140	XOM-MDB-27	10.1130/G35513.1	1065.2	32.6	1068.5	23.4	1075.1	23.8	99.0791554274021	sandstone	sedimentary	527	16912	4331	Nanafalia Fm	56.8	58.1333	True	1075.1	Cenozoic
979	29140	XOM-MDB-27	10.1130/G35513.1	1065.2	32.6	1068.5	23.4	1075.1	23.8	99.0791554274021	sandstone	sedimentary	527	16911	4331	Tuscahoma Fm	54.975	56.8	True	1075.1	Cenozoic
980	29140	XOM-MDB-27	10.1130/G35513.1	1065.2	32.6	1068.5	23.4	1075.1	23.8	99.0791554274021	sandstone	sedimentary	527	16910	4331	Bashi Fm	53.95	54.975	True	1075.1	Cenozoic
981	29140	XOM-MDB-27	10.1130/G35513.1	1065.2	32.6	1068.5	23.4	1075.1	23.8	99.0791554274021	sandstone	sedimentary	527	16909	4331	Hatchetigbee Fm	52.925	53.95	True	1075.1	Cenozoic
982	28709	Tem_Butte2	10.1130/L121.1	1436.0	18.0	1442.0	20.0	1451.0	40.0	98.96623018607856	conglomerate	sedimentary	491	15031	3998	Temple Butte Limestone	358.9	379.925	True	1436.0	Paleozoic*
983	34460	15LB03	10.1130/B25896.1	132.5	3.6						sandstone	sedimentary	294	7482	1973	Sucker Creek Fm	13.82	15.4325	True	132.5
984	37461	K	10.1130/GES01313.1	57.9	6.2	56.9	8.6				sandstone	sedimentary	520	16418	4285	Simsboro Sand Mbr	56.0	56.8	True	57.9
985	43166	BENYON-190	10.2110/jsr.2014.16	1467.7	31.0	1473.5	20.4	1481.9	22.0	99.04177069977732	sandstone	sedimentary	1625	37218	9542	McMurray Fm	111.75	125.0	True	1481.9	Mesozoic
986	43612	10095	10.1130/B30843.1	1153.0	32.0			1141.0	58.0	101.05170902716915	sandstone	sedimentary	1571	35871	9069	Taconite River Fm	445.8333	446.4667	True	1153.0	Paleozoic*
987	28676	05SP14-20	10.1130/B30029.1	2836.9	51.9	2806.5	23.5	2784.8	16.4	101.87087043952887	conglomerate	sedimentary	465	13948	3704	Sheep Pass Fm	34.875	46.175	True	2784.8	Cenozoic
988	40236	11LF13	10.1130/L533.1	1906.0	72.0	1866.0	54.0	1849.0	79.0	103.08274743104381	sandstone	sedimentary	152	5332	1258	Neruokpuk Quartzite	541.0	598.375	True	1906.0	Cambrian
989	28833	07-YHL-44	10.1130/B30530.1	1439.0	47.0	1458.0	48.0	1468.0	20.0	98.02452316076294	sandstone	sedimentary	1653	38100	9839	Saline River Fm	501.0	503.5	True	1468.0	Cambrian
990	42905	FCB-A2	http://ir.uiowa.edu/etd/3119	407.0	21.4	407.0	20.6	411.0	65.6	99.02676399026764	sandstone	sedimentary	90	3423	691	Cherokee Gp	311.0	319.0	True	407.0
991	29192	51101	10.1130/B30999.1	1075.4	47.1	1079.3	50.3	1087.2	118.1	98.91464311994113	sandstone	sedimentary	512	15908	8850	Lakota Fm	138.075	145.0	True	1075.4	Mesozoic
992	29324	12WI5	10.1130/B31142.1	1779.2	24.8	1810.8	14.6	1847.4	12.2	96.30832521381402	argillite	sedimentary	459	13634	3603	Wyman Fm	573.9	583.3	False	1847.4
993	43174	12-LHCC06	10.2110/jsr.2014.33	115.4	4.8	113.0	23.8	62.1	522.6	185.829307568438	sandstone	sedimentary	491	15053	4003	Straight Cliffs Sandstone	87.175	95.55	True	115.4
994	29129	XOM-MDB-14	10.1130/G35513.1	958.1	16.8	960.5	14.2	966.1	26.8	99.17192837180416	sandstone	sedimentary	527	16912	4331	Nanafalia Fm	56.8	58.1333	True	958.1	Cenozoic
995	29129	XOM-MDB-14	10.1130/G35513.1	958.1	16.8	960.5	14.2	966.1	26.8	99.17192837180416	sandstone	sedimentary	527	16911	4331	Tuscahoma Fm	54.975	56.8	True	958.1	Cenozoic
996	29129	XOM-MDB-14	10.1130/G35513.1	958.1	16.8	960.5	14.2	966.1	26.8	99.17192837180416	sandstone	sedimentary	527	16910	4331	Bashi Fm	53.95	54.975	True	958.1	Cenozoic
997	29129	XOM-MDB-14	10.1130/G35513.1	958.1	16.8	960.5	14.2	966.1	26.8	99.17192837180416	sandstone	sedimentary	527	16909	4331	Hatchetigbee Fm	52.925	53.95	True	958.1	Cenozoic
998	35249	HHP7272	10.1130/B30848.1	1993.5	57.2	2178.7	49.8	2358.0	75.8	84.54198473282443	sandstone	sedimentary	1657	38184	9876	Slats Creek Fm	503.5	511.0	False	1993.5
999	45598	CDGC6	https://doi.org/10.1130/B31532.1	1592.0	130.0	1617.0	102.0	1649.0	169.0	96.54335961188599	sandstone	sedimentary	491	36857	9434	Nankoweap Fm	767.6	770.4	True	1592.0
1000	29186	XOM-MDB-76	10.1130/G35513.1	161.4	25.6	192.1	98.2	587.9	1186.2	27.453648579690423	sandstone	sedimentary	165	5752	1344	Wilcox Gp	41.3	56.0	True	161.4
1001	28631	K05110	10.1130/G31335.1	1769.6	126.6	1761.5	71.4	1751.9	44.6	101.0103316399338	metasedimentary	metamorphic	491	15025	3995	Vishnu Schist	1690.0	1887.5	True	1751.9
1002	40660	KE2	10.1306/10191515029	1436.2	64.4	1437.9	40.8	1440.5	33.8	99.70149253731343	sandstone	sedimentary	1625	37218	9542	McMurray Fm	111.75	125.0	True	1440.5	Mesozoic
1003	29187	XOM-MDB-77	10.1130/G35513.1	1706.3	34.0	1699.4	20.0	1690.8	16.4	100.91672581026732	sandstone	sedimentary	525	16766	4317	Frio Fm	22.3825	28.1	True	1690.8	Cenozoic
1004	28885	LHM01	10.1130/B30657.1	1084.0	24.0	1084.0	22.0	1085.0	44.0	99.90783410138249	sandstone	sedimentary	50	1828	254	Bliss Fm	483.475	493.575	True	1084.0	Cambrian
1005	45381	JM16-77-2	10.1016/j.precamres.2017.03.006	1259.8	44.2	1245.3	29.4	1220.2	26.6	103.24536961153909	sandstone	sedimentary	491	36863	3996	Hotauta Conglomerate	1250.0	1254.0	True	1220.2
1006	45381	JM16-77-2	10.1016/j.precamres.2017.03.006	1259.8	44.2	1245.3	29.4	1220.2	26.6	103.24536961153909	sandstone	sedimentary	491	36862	3996	Bass Limestone	1244.0	1250.0	True	1220.2
1007	45381	JM16-77-2	10.1016/j.precamres.2017.03.006	1259.8	44.2	1245.3	29.4	1220.2	26.6	103.24536961153909	sandstone	sedimentary	491	36861	3996	Hakatai Shale	1180.0	1244.0	True	1220.2
1008	45381	JM16-77-2	10.1016/j.precamres.2017.03.006	1259.8	44.2	1245.3	29.4	1220.2	26.6	103.24536961153909	sandstone	sedimentary	491	36860	3996	Shinumo Quartzite	1140.0	1180.0	True	1220.2
1009	45381	JM16-77-2	10.1016/j.precamres.2017.03.006	1259.8	44.2	1245.3	29.4	1220.2	26.6	103.24536961153909	sandstone	sedimentary	491	36859	3996	Dox Sandstone	1108.0	1140.0	True	1220.2
1010	45381	JM16-77-2	10.1016/j.precamres.2017.03.006	1259.8	44.2	1245.3	29.4	1220.2	26.6	103.24536961153909	sandstone	sedimentary	491	36858	3996	Cardenas lavas	1100.0	1108.0	True	1220.2
1011	37463	SK	10.1130/GES01313.1	234.7	11.5	236.4	14.5	253.1	112.1	92.73014618727775	sandstone	sedimentary	520	16418	4285	Simsboro Sand Mbr	56.0	56.8	True	234.7
1012	28874	07SD3a	10.1130/B30657.1	1180.0	24.0	1166.0	32.0	1142.0	78.0	103.3274956217163	sandstone	sedimentary	55	2029	313	Bliss Fm	483.475	493.575	True	1180.0	Cambrian
1013	29109	XOM-AOS-16	10.1130/G35513.1	162.8	2.6	162.0	17.4	150.3	268.6	108.3166999334664	sandstone	sedimentary	1625	37219	9542	Clearwater Fm	110.5	111.75	True	162.8
1014	37469	OK-2	10.1130/GES01316.1	1869.3	14.5	1884.9	8.6	1902.1	8.2	98.27559013721677	sandstone	sedimentary	158	5568	1306	Pontotoc Gp	282.0	300.1	True	1902.1	Paleozoic*
1015	30879	TMS005	http://digitalscholarship.unlv.edu/thesesdissertations/1522/	1803.1	26.2	1822.2	16.8	1844.0	19.6	97.78199566160521	sandstone	sedimentary	468	14065	3728	Muddy Creek Fm	5.333	11.62	True	1844.0	Cenozoic
1016	42831	JL2	10.1139/E09-065	1868.4	20.2	1807.0	39.8	1812.9	41.3	103.061393347675	sandstone	sedimentary	1480	34196	8485	Jones Lake Fm	243.3	251.3	False	1868.4
1017	45602	Carb-Canyon	https://doi.org/10.1130/B31532.1	1410.0	54.0	1414.0	40.0	1419.0	70.2	99.36575052854123	sandstone	sedimentary	491	36854	9433	Carbon Canyon Member	748.0	753.6	True	1410.0
1018	28505	UT0602	10.1130/G30684.1	1711.3	44.4	1717.4	34.6	1724.8	54.0	99.21730055658627	sandstone	sedimentary	479	14623	3884	Navajo Sandstone	170.3	201.3	True	1711.3	Mesozoic
1019	45593	L-Nankoweap	https://doi.org/10.1130/B31532.1	1791.0	88.0	1777.0	52.0	1761.0	36.4	101.70357751277683	sandstone	sedimentary	491	36857	9434	Nankoweap Fm	767.6	770.4	True	1761.0
1020	45381	JM16-77-2	10.1016/j.precamres.2017.03.006	1484.0	54.0	1467.2	33.2	1442.9	25.0	102.8484302446462	sandstone	sedimentary	491	36863	3996	Hotauta Conglomerate	1250.0	1254.0	True	1442.9
1021	45381	JM16-77-2	10.1016/j.precamres.2017.03.006	1484.0	54.0	1467.2	33.2	1442.9	25.0	102.8484302446462	sandstone	sedimentary	491	36862	3996	Bass Limestone	1244.0	1250.0	True	1442.9
1022	45381	JM16-77-2	10.1016/j.precamres.2017.03.006	1484.0	54.0	1467.2	33.2	1442.9	25.0	102.8484302446462	sandstone	sedimentary	491	36861	3996	Hakatai Shale	1180.0	1244.0	True	1442.9
1023	45381	JM16-77-2	10.1016/j.precamres.2017.03.006	1484.0	54.0	1467.2	33.2	1442.9	25.0	102.8484302446462	sandstone	sedimentary	491	36860	3996	Shinumo Quartzite	1140.0	1180.0	True	1442.9
1024	45381	JM16-77-2	10.1016/j.precamres.2017.03.006	1484.0	54.0	1467.2	33.2	1442.9	25.0	102.8484302446462	sandstone	sedimentary	491	36859	3996	Dox Sandstone	1108.0	1140.0	True	1442.9
1025	45381	JM16-77-2	10.1016/j.precamres.2017.03.006	1484.0	54.0	1467.2	33.2	1442.9	25.0	102.8484302446462	sandstone	sedimentary	491	36858	3996	Cardenas lavas	1100.0	1108.0	True	1442.9
1026	40923	1BS9	10.2475/01.2007.05	434.7	8.2						metasedimentary	metamorphic	387	10587	2762	Hebron Gneiss	420.15	449.0	True	434.7
1027	30833	7CS06	http://www.mbmg.mtech.edu/pdf-open-files/mbmg569/mbmg569.pdf	79.0	18.0						sandstone	sedimentary	332	9034	2282	Renova Fm	23.03	38.675	True	79.0
1028	29050	DB0110	10.1130/B30824.1	94.5	3.0	83.1	12.2				sandstone	sedimentary	515	15990	4229	Frontier Fm	95.022	100.5	True	94.5
1029	34913	39-FC126	10.1130/GES00982.1	2909.9	38.4	2875.2	16.2	2850.9	6.2	102.06952190536322	sandstone	sedimentary	222	6547	1598	Imperial Fm	3.347	4.0333	True	2850.9	Cenozoic
1030	29069	PLR0110	10.1130/B30824.1	98.9	4.0	94.9	23.8				sandstone	sedimentary	515	15990	4229	Frontier Fm	95.022	100.5	True	98.9
1031	40692	11SJO-34	10.2475/06.2015.02	95.7	8.0	91.3	31.2				sandstone	sedimentary	414	11105	2979	Sitkalidak Fm	32.595	42.925	True	95.7
1032	28702	Lower_Hermit	10.1130/L121.1	1325.0	94.0	1320.0	68.0	1312.0	90.0	100.9908536585366	sandstone	sedimentary	491	15036	4000	Hermit Shale	279.7375	282.0	True	1312.0	Paleozoic*
1033	29073	SRC0210	10.1130/B30824.1	97.8	13.4	96.2	26.6	57.4	609.8	170.38327526132403	sandstone	sedimentary	515	15990	4229	Frontier Fm	95.022	100.5	True	97.8
1034	35325	Nestucca	10.1130/G33746.1	111.0	28.0						sandstone	sedimentary	266	7119	1824	Nestucca Fm	40.1333	40.7167	True	111.0
1035	42630	MS5	10.1086/669230	1755.9	33.3	1726.7	18.4	1691.5	8.4	103.80727165237954	sandstone	sedimentary	187	6133	6345	Mt Simon Fm	498.375	499.95	True	1691.5	Cambrian
1036	30319	GVG09-9	10.1130/B31065.1	91.9	10.0	95.1	10.6	175.0	92.6	52.51428571428571	sandstone	sedimentary	256	6918	1756	Ione Fm	46.175	47.8	True	91.9
1037	28870	04SASC	10.1130/B30657.1	1647.0	22.0	1661.0	20.0	1678.0	36.0	98.15256257449344	sandstone	sedimentary	55	2029	313	Bliss Fm	483.475	493.575	True	1647.0	Cambrian
1038	28974	GC-Monteith_A	10.1130/B30671.1	2059.6	87.6	2074.7	50.8	2089.7	50.2	98.55960185672585	sandstone	sedimentary	1626	37260	9550	Monteith Fm	139.8	146.775	True	2089.7	Mesozoic
1039	42885	C-86116	10.1139/E10-006	2001.0	40.0	2054.0	28.0	2109.0	32.0	94.87908961593172	sandstone	sedimentary	1541	35486	8934	Isachsen Fm	116.0	126.1	False	2109.0
1040	34002	C1	10.1130/L451.1	171.2	4.8	200.0	46.0	556.0	546.0	30.79136690647482	conglomerate	sedimentary	1454	33654	8226	Tantalus	126.1	150.325	True	171.2
1041	34498	7810	10.1130/B25989.1	1886.0	42.0			1937.0	68.0	97.3670624677336	sandstone	sedimentary	757	22001	6028	Dunvegan	1326.25	1351.0	True	1886.0
1042	34720	C403752	10.1144/M35.37	577.0	14.0			432.0	104.0	133.5648148148148	sandstone	sedimentary	1538	35407	8914	Heiberg Fm	182.7	213.125	True	577.0	Mesozoic
1043	30884	TMS012	http://digitalscholarship.unlv.edu/thesesdissertations/1522/	418.0	3.8	419.5	11.8	427.9	74.0	97.68637532133675	sandstone	sedimentary	468	14065	3728	Muddy Creek Fm	5.333	11.62	True	418.0
1044	30826	26CS07	http://www.mbmg.mtech.edu/pdf-open-files/mbmg569/mbmg569.pdf	101.0	4.0						sandstone	sedimentary	331	9000	2271	Flood Mbr	109.875	116.0	True	101.0
1045	30826	26CS07	http://www.mbmg.mtech.edu/pdf-open-files/mbmg569/mbmg569.pdf	101.0	4.0						sandstone	sedimentary	331	8999	2271	Taft Hill Mbr	103.625	109.875	True	101.0
1046	30826	26CS07	http://www.mbmg.mtech.edu/pdf-open-files/mbmg569/mbmg569.pdf	101.0	4.0						sandstone	sedimentary	331	8998	2271	Vaughn Mbr	100.5	103.625	True	101.0
1047	30826	26CS07	http://www.mbmg.mtech.edu/pdf-open-files/mbmg569/mbmg569.pdf	101.0	4.0						sandstone	sedimentary	331	8997	2271	Dunkleberg Mbr	100.5	103.625	True	101.0
1048	29206	51210	10.1130/B30999.1	102.5	8.8	90.6	21.1				sandstone	sedimentary	504	15543	4128	Ericson Sandstone	81.6833	89.8	True	102.5
1049	34337	LQZT	10.1130/0-8137-1197-5.459	1184.0	24.0			1194.0	42.0	99.16247906197655	sandstone	sedimentary	353	10010	2524	Metcalf Phyllite	603.883	678.7	True	1184.0
1050	34337	LQZT	10.1130/0-8137-1197-5.459	1184.0	24.0			1194.0	42.0	99.16247906197655	sandstone	sedimentary	353	10009	2524	Wading Branch Fm	664.93	678.7	True	1184.0
1051	34337	LQZT	10.1130/0-8137-1197-5.459	1184.0	24.0			1194.0	42.0	99.16247906197655	sandstone	sedimentary	353	10008	2524	Longarm Quartzite	617.5015	664.93	True	1184.0
1052	34337	LQZT	10.1130/0-8137-1197-5.459	1184.0	24.0			1194.0	42.0	99.16247906197655	sandstone	sedimentary	353	10007	2524	Roaring Fork Sandstone	617.194	617.5015	True	1184.0
1053	34337	LQZT	10.1130/0-8137-1197-5.459	1184.0	24.0			1194.0	42.0	99.16247906197655	sandstone	sedimentary	353	10006	2524	Pigeon Siltstone	603.883	617.194	True	1184.0
1054	34337	LQZT	10.1130/0-8137-1197-5.459	1184.0	24.0			1194.0	42.0	99.16247906197655	sandstone	sedimentary	353	10005	2524	Rich Butt Sandstone	591.9995	603.883	True	1184.0
1055	34159	Parry6	10.1139/e2012-067	1057.4	39.5	1043.7	49.9	1086.0	35.6	97.36648250460405	sandstone	sedimentary	1521	35047	8834	Consett Head Mbr	361.1167	363.3333	True	1086.0	Paleozoic*
1056	34159	Parry6	10.1139/e2012-067	1057.4	39.5	1043.7	49.9	1086.0	35.6	97.36648250460405	sandstone	sedimentary	1521	35046	8834	Cape Fortune Mbr	363.3333	368.875	True	1086.0	Paleozoic*
1057	34159	Parry6	10.1139/e2012-067	1057.4	39.5	1043.7	49.9	1086.0	35.6	97.36648250460405	sandstone	sedimentary	1521	35045	8834	Burnett Point Mbr	368.875	374.5625	True	1086.0	Paleozoic*
1058	29066	MH0210	10.1130/B30824.1	164.0	6.0	170.6	18.2	263.7	253.6	62.19188471748199	sandstone	sedimentary	515	15994	4229	Sundance Fm	158.354	168.8	True	164.0
1059	40694	RB12-01	10.2475/06.2015.02	415.6	13.0	423.5	20.8	466.5	112.8	89.08896034297963	sandstone	sedimentary	413	11097	2972	Orca Gp	53.95	64.9	True	415.6
1060	34159	Parry6	10.1139/e2012-067	1030.8	33.8	1005.2	43.7	1085.8	23.8	94.93461042549272	sandstone	sedimentary	1521	35047	8834	Consett Head Mbr	361.1167	363.3333	True	1085.8	Paleozoic*
1061	34159	Parry6	10.1139/e2012-067	1030.8	33.8	1005.2	43.7	1085.8	23.8	94.93461042549272	sandstone	sedimentary	1521	35046	8834	Cape Fortune Mbr	363.3333	368.875	True	1085.8	Paleozoic*
1062	34159	Parry6	10.1139/e2012-067	1030.8	33.8	1005.2	43.7	1085.8	23.8	94.93461042549272	sandstone	sedimentary	1521	35045	8834	Burnett Point Mbr	368.875	374.5625	True	1085.8	Paleozoic*
1063	43176	12-LHCC07	10.2110/jsr.2014.33	1683.2	45.6	1681.3	30.9	1678.9	39.8	100.25612007862291	sandstone	sedimentary	491	15052	4003	Wahweap Sandstone	84.275	87.175	True	1678.9	Mesozoic
1064	45597	CDGC5	https://doi.org/10.1130/B31532.1	779.0	22.0	770.0	90.0	743.0	117.0	104.84522207267833	sandstone	sedimentary	491	36857	9434	Nankoweap Fm	767.6	770.4	True	779.0
1065	43652	C-054480	10.1144/jgs2014-027	686.0	15.0	682.0	16.0	685.0	32.0	100.14598540145985	sandstone	sedimentary	1566	35810	9042	Lands Lokk Fm	426.3	433.4	True	686.0	Paleozoic*
1066	43176	12-LHCC07	10.2110/jsr.2014.33	1094.5	49.9	1101.7	60.9	1116.0	151.3	98.07347670250896	sandstone	sedimentary	491	15052	4003	Wahweap Sandstone	84.275	87.175	True	1094.5	Mesozoic
1067	29327	WM101	10.1130/B31142.1	1736.0	24.0	1755.0	14.6	1762.7	10.6	98.48527826629602	quartzite	metamorphic	459	13631	3603	Campito Fm	536.05	541.0	True	1762.7	Cambrian
1068	37270	6PL13	10.1130/L557.1	1932.0	16.0	1928.0	9.0	1923.0	6.0	100.46801872074883	quartzite	metamorphic	324	8736	2206	Phi Kappa Fm	431.9	475.1334	True	1923.0	Paleozoic*
1069	29114	XOM-AOS-23	10.1130/G35513.1	1664.4	30.2	1661.5	17.6	1657.9	12.0	100.39206224742144	sandstone	sedimentary	1625	37218	9542	McMurray Fm	111.75	125.0	True	1657.9	Mesozoic
1070	43195	CP18	10.2110/jsr.2008.088	1069.3	35.8	1089.1	39.4	1129.0	92.0	94.71213463241807	sandstone	sedimentary	490	15003	3990	Chinle Fm	201.3	232.0	True	1069.3	Mesozoic
1071	42084	A	10.1016/S0037-0738(03)00158-1	1517.0	66.0	1524.0	41.0	1534.0	20.0	98.89178617992177	sandstone	sedimentary	494	15139	4020	Cutler Fm	269.4875	298.9	True	1534.0	Paleozoic*
1072	29130	XOM-MDB-17	10.1130/G35513.1	983.5	24.8	992.5	29.0	1012.4	75.0	97.14539707625444	sandstone	sedimentary	531	17122	4364	Wilcox Gp	53.2667	58.4	True	983.5	Cenozoic
1073	28505	UT0602	10.1130/G30684.1	2479.3	178.2	2594.2	125.4	2685.3	168.4	92.3286038803858	sandstone	sedimentary	479	14623	3884	Navajo Sandstone	170.3	201.3	True	2685.3	Mesozoic
1074	30299	CLS06-2	10.1130/B31065.1	116.4	16.8	133.0	63.2	440.4	1093.6	26.430517711171664	sandstone	sedimentary	215	6524	1589	Lusardi Fm	80.725	92.875	True	116.4
1075	28718	EBK	10.1130/G31762.1	2460.1	56.2	2622.5	27.7	2750.3	17.4	89.44842380831182	conglomerate	sedimentary	1641	37797	9719	Cadomin Fm	122.0	126.1	False	2750.3
1076	35722	NR9	10.1016/j.precamres.2012.02.017	1799.1	20.8			1821.0	24.0	98.79736408566721	sandstone	sedimentary	466	13993	3712	Stirling Quartzite	867.5065	1193.9935	True	1799.1
1077	29066	MH0210	10.1130/B30824.1	1041.0	32.6	1038.1	26.2	1032.0	44.2	100.87209302325581	sandstone	sedimentary	515	15994	4229	Sundance Fm	158.354	168.8	True	1041.0	Mesozoic
1078	42910	FCB-D4	http://ir.uiowa.edu/etd/3119	363.0	12.2	378.0	23.6	474.0	147.2	76.58227848101266	sandstone	sedimentary	89	3399	688	Cherokee Gp	311.0	319.0	True	363.0
1079	45592	B-Nankoweap	https://doi.org/10.1130/B31532.1	974.0	30.0	1033.0	36.0	1162.0	46.8	83.8209982788296	sandstone	sedimentary	491	36857	9434	Nankoweap Fm	767.6	770.4	False	974.0
1080	43171	12-PC04	10.2110/jsr.2014.33	1704.9	79.4	1723.1	111.7	1745.2	226.7	97.69080907632363	sandstone	sedimentary	491	15053	4003	Straight Cliffs Sandstone	87.175	95.55	True	1704.9	Mesozoic
1081	28709	Tem_Butte2	10.1130/L121.1	1771.0	68.0	1767.0	46.0	1762.0	58.0	100.51078320090807	conglomerate	sedimentary	491	15031	3998	Temple Butte Limestone	358.9	379.925	True	1762.0	Paleozoic*
1082	34012	CO13-Ec-1Jebb	10.1130/L467.1	2087.6	17.1	2084.9	11.2	2082.3	14.6	100.25452624501753	sandstone	sedimentary	500	15414	4091	Entrada Fm	163.5	166.1	True	2082.3	Mesozoic
1083	37463	SK	10.1130/GES01313.1	1835.5	71.5	1790.1	48.5	1738.1	63.9	105.60382026350614	sandstone	sedimentary	520	16418	4285	Simsboro Sand Mbr	56.0	56.8	True	1738.1	Cenozoic
1084	28874	07SD3a	10.1130/B30657.1	1306.0	52.0	1290.0	58.0	1264.0	130.0	103.32278481012658	sandstone	sedimentary	55	2029	313	Bliss Fm	483.475	493.575	True	1306.0	Cambrian
1085	35110	JL17A	10.1144/0016-76492008-088	600.8	22.2	590.1	54.4	600.7	82.4	100.01664724488097	sandstone	sedimentary	589	18452	4758	Random	541.0	562.939	True	600.8	Cambrian
1086	29186	XOM-MDB-76	10.1130/G35513.1	59.3	1.2	55.7	8.2				sandstone	sedimentary	165	5752	1344	Wilcox Gp	41.3	56.0	True	59.3
1087	28677	06MR19	10.1130/B30029.1	111.3	1.3	117.4	2.5	241.5	43.8	46.08695652173913	limestone	sedimentary	465	13948	3704	Sheep Pass Fm	34.875	46.175	False	111.3
1088	30833	7CS06	http://www.mbmg.mtech.edu/pdf-open-files/mbmg569/mbmg569.pdf	74.0	6.0						sandstone	sedimentary	332	9034	2282	Renova Fm	23.03	38.675	True	74.0
1089	34178	05KP42	http://www.carleton.edu/departments/geol/Resources/comps/CompsPDFfiles/2006CompsPapers/Lundquist2006.pdf	2692.6	31.0	2681.3	49.1	2701.1	21.1	99.68531339084078	quartzite	metamorphic	192	6172	1477	Palms Fm	1937.5	2162.5	True	2701.1
1090	28504	CP32	10.1130/G30684.1	1150.4	42.2	1153.6	62.0	1153.6	62.0	99.72260748959778	conglomerate	sedimentary	502	15469	4106	Cedar Mountain Fm	122.0	125.0	True	1150.4	Mesozoic
1091	28692	06GC156	10.1130/L121.1	1659.0	30.0	1663.0	32.0	1668.0	60.0	99.46043165467626	sandstone	sedimentary	491	15037	4000	Supai Fm	282.0	313.75	True	1659.0	Paleozoic*
1092	34923	49-TBP79122	10.1130/GES00982.1	25.6	4.8	15.1	31.0				sandstone	sedimentary	485	14891	3960	Browns Park Fm	3.347	13.27	True	25.6
1093	28959	XOM-AOS-14	10.1130/G35513.1	430.8	39.2	429.4	34.2	422.2	54.4	102.03694931312174	sandstone	sedimentary	1625	37221	9542	Grand Rapids Fm	108.0	109.25	True	430.8
1094	45685	11757	10.1016/j.precamres.2017.04.035	2553.4	76.8			2594.3	22.0	98.42346683112979	arkose	sedimentary	770	22322	6201	Denault	2070.997	2104.0	True	2594.3
1095	29211	51218	10.1130/B30999.1	524.2	22.4	517.9	45.8	490.3	229.1	106.91413420354885	sandstone	sedimentary	491	15055	4003	Dakota Fm	95.55	100.5	True	524.2
1096	42906	FCB-AD	http://ir.uiowa.edu/etd/3119	993.0	44.4	977.0	37.4	939.0	71.8	105.75079872204473	sandstone	sedimentary	90	3423	691	Cherokee Gp	311.0	319.0	True	993.0	Paleozoic*
1097	37783	08-188	http://ir.uiowa.edu/etd/3496/	1064.0	44.0	1084.0	38.0	1123.0	72.0	94.74621549421194	greywacke	sedimentary	1558	35709	8994	Danish River Fm	427.4	438.5	True	1064.0	Paleozoic*
1098	28684	3-24-04-3	10.1130/B30206.1	229.3	7.4	240.5	63.2	350.6	667.0	65.40216771249287	sandstone	sedimentary	35	2899	528	McCoy Mountains Fm	116.0	168.8	True	229.3
1099	28515	UT8A	10.1130/G30684.1	1225.8	40.4	1238.0	53.6	1259.4	128.4	97.3320628870891	conglomerate	sedimentary	502	15469	4106	Cedar Mountain Fm	122.0	125.0	True	1225.8	Mesozoic
1100	37469	OK-2	10.1130/GES01316.1	2645.2	32.1	2677.1	14.8	2701.3	9.0	97.92322215229704	sandstone	sedimentary	158	5568	1306	Pontotoc Gp	282.0	300.1	True	2701.3	Paleozoic*
1101	43653	C-194771	10.1144/jgs2014-027	2523.0	40.0	2524.0	35.0	2532.0	27.0	99.64454976303317	sandstone	sedimentary	1566	35810	9042	Lands Lokk Fm	426.3	433.4	True	2532.0	Paleozoic*
1102	29132	XOM-MDB-19	10.1130/G35513.1	1215.0	34.0	1223.2	44.2	1237.6	105.8	98.17388493859082	sandstone	sedimentary	531	17122	4364	Wilcox Gp	53.2667	58.4	True	1215.0	Cenozoic
1103	29053	EB0110	10.1130/B30824.1	1720.3	128.8	1722.2	71.4	1724.4	21.2	99.76223614010671	sandstone	sedimentary	515	16008	4229	Mesaverde Fm	80.725	90.825	True	1724.4	Mesozoic
1104	42909	FCB-D3	http://ir.uiowa.edu/etd/3119	1133.0	35.6	1140.0	28.2	1155.0	45.2	98.0952380952381	sandstone	sedimentary	80	2986	581	Cherokee Gp	310.5	317.25	True	1133.0	Paleozoic*
1105	37802	YA-5	http://cedar.wwu.edu/wwuet/356/	1171.0	41.7	1240.1	28.1	1362.3	9.9	85.95757175365192	metasedimentary	metamorphic	1446	33546	8154	Yellow Aster Complex Fm	458.4	508.5	False	1362.3
1106	35317	GVG18	10.1130/G33746.1	1354.0	23.6	1366.6	17.2	1386.3	23.4	97.67005698622232	sandstone	sedimentary	251	6864	1743	Lower Markley Sandstone Mbr	40.425	42.925	True	1386.3	Cenozoic
1107	35317	GVG18	10.1130/G33746.1	1354.0	23.6	1366.6	17.2	1386.3	23.4	97.67005698622232	sandstone	sedimentary	251	6862	1743	Upper Markley Sandstone Mbr	37.8	38.675	True	1386.3	Cenozoic
1108	42626	MS1	10.1086/669230	2677.6	36.4	2698.8	16.0	2714.6	5.1	98.63699992632432	sandstone	sedimentary	187	6133	6345	Mt Simon Fm	498.375	499.95	True	2714.6	Cambrian
1109	40658	CW3	10.1306/10191515029	1896.7	110.6	1884.4	61.2	1870.9	42.6	101.37901544711102	sandstone	sedimentary	1625	37218	9542	McMurray Fm	111.75	125.0	True	1870.9	Mesozoic
1110	29094	CS12-3	10.1130/B30884.1	530.0	16.0	688.0	18.0	1244.0	17.0	42.60450160771704	sandstone	sedimentary	57	2075	10064	Van Horn Sandstone	515.19	519.6	False	530.0
1111	43175	12-PC09	10.2110/jsr.2014.33	1666.9	42.2	1662.3	45.4	1656.4	88.0	100.63390485390002	sandstone	sedimentary	491	15053	4003	Straight Cliffs Sandstone	87.175	95.55	True	1666.9	Mesozoic
1112	35702	11RMSS3	10.1016/j.precamres.2014.06.005	1808.9	45.0	1831.7	24.4	1857.8	7.0	97.36785445150177	sandstone	sedimentary	464	13874	3691	Beck Spring Dolomite	677.5	686.0	True	1857.8
1113	28742	09ANJ13	10.1130/L131.1	74.2	4.2	93.1	259.6				sandstone	sedimentary	413	11096	2971	Valdez Gp	67.525	83.6	True	74.2
1114	28678	06NW1	10.1130/B30029.1	115.8	3.6	122.7	7.3	258.3	125.2	44.83159117305459	siltstone	sedimentary	463	13837	3673	Newark Canyon Fm	113.0	122.0	True	115.8
1115	29190	XOM-MDB-80	10.1130/G35513.1	676.2	35.8	718.3	31.0	852.0	47.2	79.36619718309859	sandstone	sedimentary	518	16247	4268	Frio Fm	24.2975	28.1	True	676.2	Cenozoic
1116	30310	GVG09-15	10.1130/B31065.1	86.5	6.4	91.1	195.2				sandstone	sedimentary	252	6880	1748	Deer Valley Fm	66.0	67.525	True	86.5
1117	28631	K05110	10.1130/G31335.1	1794.7	131.6	1802.5	74.6	1811.6	50.2	99.06712298520645	metasedimentary	metamorphic	491	15025	3995	Vishnu Schist	1690.0	1887.5	True	1811.6
1118	40669	LB3	10.1306/10191515029	1131.5	26.0	1134.1	21.4	1139.0	37.8	99.34152765583845	sandstone	sedimentary	1625	37218	9542	McMurray Fm	111.75	125.0	True	1131.5	Mesozoic
1119	45595	K1252NAN2	https://doi.org/10.1130/B31532.1	977.0	26.0	974.0	36.0	969.0	46.8	100.82559339525284	sandstone	sedimentary	491	36857	9434	Nankoweap Fm	767.6	770.4	True	977.0
1120	29207	51211	10.1130/B30999.1	1863.1	18.7	1892.6	10.1	1925.0	4.6	96.78441558441558	sandstone	sedimentary	504	15542	4128	Almond Fm	79.7667	81.6833	False	1925.0
1121	43167	BENYON-247	10.2110/jsr.2014.16	1132.9	51.4	1137.0	39.4	1145.1	58.6	98.9345908654266	sandstone	sedimentary	1625	37218	9542	McMurray Fm	111.75	125.0	True	1132.9	Mesozoic
1122	30331	SG-40	10.1130/B31065.1	155.7	7.6	60.0	200.0				sandstone	sedimentary	570	18076	4646	San Emigdio Shale and Tejon Fm	36.825	47.8	True	155.7
1123	29168	XOM-MDB-58	10.1130/G35513.1	76.2	1.6	76.7	5.2	90.3	156.6	84.38538205980066	sandstone	sedimentary	519	16306	4277	Frio Fm	22.3825	31.0	True	76.2
1124	34500	7812	10.1130/B25989.1	2628.0	64.0			2710.0	42.0	96.97416974169742	sandstone	sedimentary	757	22001	6028	Dunvegan	1326.25	1351.0	True	2710.0
1125	40919	MG130	10.2475/01.2007.05	1426.2	59.2			2472.0	90.0	57.69417475728155	metasedimentary	metamorphic	385	10560	2747	Berwick Fm	438.5	443.8	True	1426.2	Paleozoic*
1126	43131	CUT04-VI-5-5	10.1016/j.palaeo.2008.03.050	1429.6	3.9	1429.7	15.2	1429.8	33.6	99.9860120296545	siltstone	sedimentary	494	15139	4020	Cutler Fm	269.4875	298.9	True	1429.6	Paleozoic*
1127	29334	303569	10.1130/L420.1					1873.0	26.0		quartzite	metamorphic	1585	36012	9111	Polkorridoren Gp	521.0	523.0	True	1873.0	Cambrian
1128	29044	BHB0903	10.1130/B30824.1	2937.5	46.2	2995.4	27.4	3034.4	33.0	96.80661745320327	sandstone	sedimentary	515	15990	4229	Frontier Fm	95.022	100.5	False	3034.4
1129	37462	Q	10.1130/GES01313.1	618.9	47.4	651.7	43.8	766.7	96.9	80.72257727924872	sandstone	sedimentary	520	16412	4285	Queen City Fm	42.925	46.175	True	618.9	Cenozoic
1130	30299	CLS06-2	10.1130/B31065.1	106.3	5.6	108.9	16.6	165.8	352.6	64.1133896260555	sandstone	sedimentary	215	6524	1589	Lusardi Fm	80.725	92.875	True	106.3
1131	29044	BHB0903	10.1130/B30824.1	2989.8	223.4	3063.5	132.8	3112.2	160.4	96.06709080393291	sandstone	sedimentary	515	15990	4229	Frontier Fm	95.022	100.5	True	3112.2	Mesozoic
1132	34084	11270	10.1130/L517.1	1232.5	23.8			1246.2	15.8	98.90065800032097	sandstone	sedimentary	1531	35274	8890	King Christian Fm	176.25	184.725	True	1246.2	Mesozoic
1133	28575	T1	10.1130/B30120.1	1305.9	29.9	1250.9	38.9	1199.4	73.3	108.87943971985993	sandstone	sedimentary	1657	38191	9877	Imperial Fm	362.225	382.7	False	1305.9
1134	28680	06SP29-30	10.1130/B30029.1	1162.7	29.1	1181.6	39.0	1216.4	95.7	95.5853337717856	siltstone	sedimentary	465	13948	3704	Sheep Pass Fm	34.875	46.175	True	1162.7	Cenozoic
1135	29212	51219	10.1130/B30999.1	1181.4	32.2	1184.2	26.2	1189.2	44.6	99.34409687184662	sandstone	sedimentary	504	15543	4128	Ericson Sandstone	81.6833	89.8	True	1181.4	Mesozoic
1136	37459	F1	10.1130/GES01313.1	960.3	28.2	951.2	35.8	930.2	99.8	103.23586325521393	sandstone	sedimentary	520	16417	4285	Calvert Bluff Fm	54.6333	56.0	True	960.3	Cenozoic
1137	43652	C-054480	10.1144/jgs2014-027	1379.0	16.0	1366.0	17.0	1319.0	21.0	104.5489006823351	sandstone	sedimentary	1566	35810	9042	Lands Lokk Fm	426.3	433.4	True	1379.0	Paleozoic*
1138	28634	K06246	10.1130/G31335.1	1759.8	60.6	1753.7	36.8	1746.4	36.2	100.76729271644525	metasedimentary	metamorphic	484	14829	3938	Vishnu Schist	1690.0	1887.5	True	1746.4
1139	29112	XOM-AOS-20	10.1130/G35513.1	113.6	3.8	116.4	12.6	173.8	257.6	65.36248561565017	sandstone	sedimentary	1625	37221	9542	Grand Rapids Fm	108.0	109.25	True	113.6
1140	42831	JL2	10.1139/E09-065	960.2	64.2	936.9	151.1	987.8	337.0	97.20591212796113	sandstone	sedimentary	1480	34196	8485	Jones Lake Fm	243.3	251.3	True	960.2	Mesozoic
1141	45593	L-Nankoweap	https://doi.org/10.1130/B31532.1	1054.0	12.0	1054.0	20.0	1054.0	26.0	100.0	sandstone	sedimentary	491	36857	9434	Nankoweap Fm	767.6	770.4	True	1054.0
1142	29094	CS12-3	10.1130/B30884.1	1077.0	33.0	1114.0	29.0	1188.0	27.0	90.65656565656566	sandstone	sedimentary	57	2075	10064	Van Horn Sandstone	515.19	519.6	True	1188.0	Cambrian
1143	43614	10087	10.1130/B30843.1	1244.0	24.0			1235.0	26.0	100.72874493927127	sandstone	sedimentary	1572	35879	9073	Lorimer Ridge Fm	444.0333	444.2667	True	1244.0	Paleozoic*
1144	42627	MS2	10.1086/669230	2649.3	29.1	2677.2	13.1	2698.4	6.1	98.18040320189742	sandstone	sedimentary	187	6133	6345	Mt Simon Fm	498.375	499.95	True	2698.4	Cambrian
1145	37783	08-188	http://ir.uiowa.edu/etd/3496/	1357.0	180.0	1372.0	112.0	1395.0	30.0	97.27598566308244	greywacke	sedimentary	1558	35709	8994	Danish River Fm	427.4	438.5	True	1395.0	Paleozoic*
1146	37760	14-6c	https://uh-ir.tdl.org/uh-ir/handle/10657/964	103.1	2.2	103.3	2.4	108.0	49.1	95.46296296296296	sandstone	sedimentary	1633	37499	9607	Dunvegan Fm	95.0	96.1	True	103.1
1147	35706	2CD11	10.1016/j.precamres.2014.06.005	1664.3	9.0	1665.1	16.6	1666.1	35.6	99.89196326751096	arkose	sedimentary	464	13894	3692	Noonday Dolomite	569.2	578.6	True	1664.3
1148	28648	2DB2	10.1130/B30235.1	1765.0	49.4	1782.1	31.6	1802.1	36.0	97.94129071638643	sandstone	sedimentary	486	16049	4243	Wind River Fm	47.8	53.95	True	1802.1	Cenozoic
1149	35250	08EAB10	10.1130/B30860.1	1185.9	41.6	1178.4	30.4	1164.8	40.8	101.81146978021978	slate	metamorphic	477	14498	3843	Perry Canyon Fm	663.3331	668.0557	True	1164.8
1150	45604	K065715	https://doi.org/10.1130/B31532.1	1432.0	120.0	1427.0	92.0	1419.0	156.0	100.91613812544045	sandstone	sedimentary	491	36852	9433	Carbon Butte Member	736.8	742.4	True	1432.0
1151	29013	09ANJ40	10.1130/B30818.1	192.0	6.0	194.0	30.0				sandstone	sedimentary	413	11096	2971	Valdez Gp	67.525	83.6	True	192.0
1152	28730	6135	10.1130/B30260.1	195.4	9.8			169.7	65.4	115.14437242192103	sandstone	sedimentary	290	7500	1979	Snowshoe Fm	165.45	176.25	True	195.4
1153	43618	10094	10.1130/B30843.1	1649.0	44.0			1645.0	34.0	100.24316109422492	sandstone	sedimentary	1560	35737	9001	Danish River Fm	427.4	438.5	True	1645.0	Paleozoic*
1154	34499	7811	10.1130/B25989.1	1844.0	40.0			1962.0	50.0	93.98572884811416	sandstone	sedimentary	757	22001	6028	Dunvegan	1326.25	1351.0	True	1844.0
1155	28597	CO22	10.1130/G31250.1	1838.2	151.6	1979.4	102.8	2130.3	122.6	86.2883161995963	sandstone	sedimentary	502	15460	4104	Colton Fm	49.85	56.8	True	2130.3	Cenozoic
1156	40692	11SJO-34	10.2475/06.2015.02	58.9	1.4	58.7	6.2	50.0	256.0	117.8	sandstone	sedimentary	414	11105	2979	Sitkalidak Fm	32.595	42.925	True	58.9
1157	30880	TMS008	http://digitalscholarship.unlv.edu/thesesdissertations/1522/	634.0	25.8	634.6	30.4	636.7	103.2	99.5759384325428	sandstone	sedimentary	468	14065	3728	Muddy Creek Fm	5.333	11.62	True	634.0	Cenozoic
1158	29171	XOM-MDB-61	10.1130/G35513.1	1444.3	42.0	1441.7	36.6	1437.7	66.2	100.45906656465186	sandstone	sedimentary	518	16247	4268	Frio Fm	24.2975	28.1	True	1444.3	Cenozoic
1159	29169	XOM-MDB-59	10.1130/G35513.1	34.4	6.8	34.0	30.6	8.9	2245.0	386.5168539325843	sandstone	sedimentary	519	16306	4277	Frio Fm	22.3825	31.0	True	34.4
1160	42088	E	10.1016/S0037-0738(03)00158-1	765.0	35.0	786.0	37.0	844.0	52.0	90.63981042654028	sandstone	sedimentary	495	15189	4029	Carmel Fm	166.1	176.25	True	765.0	Mesozoic
1161	42088	E	10.1016/S0037-0738(03)00158-1	765.0	35.0	786.0	37.0	844.0	52.0	90.63981042654028	sandstone	sedimentary	495	15188	4029	Entrada Fm	164.15	166.1	True	765.0	Mesozoic
1162	42088	E	10.1016/S0037-0738(03)00158-1	765.0	35.0	786.0	37.0	844.0	52.0	90.63981042654028	sandstone	sedimentary	495	15187	4029	Summerville Fm	157.3	164.15	True	765.0	Mesozoic
1163	42088	E	10.1016/S0037-0738(03)00158-1	765.0	35.0	786.0	37.0	844.0	52.0	90.63981042654028	sandstone	sedimentary	495	15186	4029	Curtis Fm	164.15	165.125	True	765.0	Mesozoic
1164	42088	E	10.1016/S0037-0738(03)00158-1	765.0	35.0	786.0	37.0	844.0	52.0	90.63981042654028	sandstone	sedimentary	495	15185	4029	Bluff Fm	157.3	161.95	True	765.0	Mesozoic
1165	28862	CLA708	http://specialpapers.gsapubs.org/content/487/63.abstract	71.5	1.0	53.2	34.5				sandstone	sedimentary	332	9034	2282	Renova Fm	23.03	38.675	True	71.5
1166	40656	CW1	10.1306/10191515029	1660.6	18.4	1655.6	24.8	1649.3	51.4	100.6851391499424	sandstone	sedimentary	1625	37218	9542	McMurray Fm	111.75	125.0	True	1660.6	Mesozoic
1167	35339	CB55	http://scielo.unam.mx/pdf/rmcg/v23n3/v23n3a2.pdf	291.0	12.0	275.0	52.0	138.0	510.0	210.8695652173913	sandstone	sedimentary	1431	33135	7741	Santa Rosa	304.975	317.125	True	291.0
1168	35339	CB55	http://scielo.unam.mx/pdf/rmcg/v23n3/v23n3a2.pdf	291.0	12.0	275.0	52.0	138.0	510.0	210.8695652173913	sandstone	sedimentary	1431	33134	7740	Santa Rosa	332.125	349.975	True	291.0
1169	43185	SR	10.2110/jsr.2008.088	522.4	7.0	483.4	50.5	302.8	297.8	172.5231175693527	sandstone	sedimentary	71	2537	461	Santa Rosa Sandstone	227.0	237.0	True	522.4
1170	35713	K03DV04	10.1016/j.precamres.2014.06.005	1648.8	36.8	1696.6	52.4	1756.2	106.8	93.8845234028015	arkose	sedimentary	464	13875	3691	Crystal Spring Fm	686.0	703.0	True	1648.8
1171	30314	GVG09-2	10.1130/B31065.1	106.1	26.8	227.1	795.2				conglomerate	sedimentary	255	6914	1755	Lathrop Sand	74.975	75.55	True	106.1
1172	30314	GVG09-2	10.1130/B31065.1	106.1	26.8	227.1	795.2				conglomerate	sedimentary	255	6909	1755	Ragged Valley Silt	69.5838	71.0935	True	106.1
1173	35297	GV40	http://gsabulletin.gsapubs.org/content/114/12/1564.short	154.0	11.7						sandstone	sedimentary	260	6975	1767	Fiske Creek	93.9	95.55	True	154.0
1174	28577	T3	10.1130/B30120.1	446.4	6.7	431.2	15.9	442.4	87.3	100.90415913200724	sandstone	sedimentary	1657	38191	9877	Imperial Fm	362.225	382.7	True	446.4
1175	29146	XOM-MDB-34	10.1130/G35513.1	68.7	9.0	53.4	56.6				sandstone	sedimentary	526	16848	4323	Lower Frio Mbr	26.8325	27.4663	True	68.7
1176	29146	XOM-MDB-34	10.1130/G35513.1	68.7	9.0	53.4	56.6				sandstone	sedimentary	526	16847	4323	Middle Frio Mbr	24.9313	26.8325	True	68.7
1177	29146	XOM-MDB-34	10.1130/G35513.1	68.7	9.0	53.4	56.6				sandstone	sedimentary	526	16846	4323	Upper Frio Mbr	24.2975	24.9313	True	68.7
1178	28649	2DB257	10.1130/B30235.1	1944.0	49.4	1954.3	169.8	1965.2	346.0	98.92122939141055	sandstone	sedimentary	486	16049	4243	Wind River Fm	47.8	53.95	True	1944.0	Cenozoic
1179	29048	CCR0310	10.1130/B30824.1	1752.9	92.8	1762.9	51.4	1774.8	20.0	98.76605814739689	sandstone	sedimentary	515	15993	4229	Morrison Fm	145.0	158.354	True	1774.8	Mesozoic
1180	35249	HHP7272	10.1130/B30848.1	2280.7	108.4	2330.4	59.8	2374.2	56.6	96.06183135371914	sandstone	sedimentary	1657	38184	9876	Slats Creek Fm	503.5	511.0	True	2374.2	Cambrian
1181	34444	RAR-00-10-zir	10.1130/B25564.1					1980.6	15.6		sandstone	sedimentary	1614	36845	9431	Porcupine Hills Fm	58.5	63.25	True	1980.6	Cenozoic
1182	29129	XOM-MDB-14	10.1130/G35513.1	1043.1	32.2	1040.4	24.4	1034.8	34.8	100.8020873598763	sandstone	sedimentary	527	16912	4331	Nanafalia Fm	56.8	58.1333	True	1043.1	Cenozoic
1183	29129	XOM-MDB-14	10.1130/G35513.1	1043.1	32.2	1040.4	24.4	1034.8	34.8	100.8020873598763	sandstone	sedimentary	527	16911	4331	Tuscahoma Fm	54.975	56.8	True	1043.1	Cenozoic
1184	29129	XOM-MDB-14	10.1130/G35513.1	1043.1	32.2	1040.4	24.4	1034.8	34.8	100.8020873598763	sandstone	sedimentary	527	16910	4331	Bashi Fm	53.95	54.975	True	1043.1	Cenozoic
1185	29129	XOM-MDB-14	10.1130/G35513.1	1043.1	32.2	1040.4	24.4	1034.8	34.8	100.8020873598763	sandstone	sedimentary	527	16909	4331	Hatchetigbee Fm	52.925	53.95	True	1043.1	Cenozoic
1186	30335	SG-21	10.1130/B31065.1	146.2	6.4	142.6	13.0	82.4	205.8	177.4271844660194	sandstone	sedimentary	561	17795	4624	Lodo Fm	58.6667	59.2	True	146.2
1187	35248	88PF5	10.1130/B30848.1	2434.0	77.0	2443.4	52.8	2451.3	72.4	99.29425202953534	conglomerate	sedimentary	1657	38183	9876	Illtyd Fm	511.0	518.5	True	2451.3	Cambrian
1188	29094	CS12-3	10.1130/B30884.1	462.0	51.0	1434.0	140.0	3487.0	121.0	13.249211356466876	sandstone	sedimentary	57	2075	10064	Van Horn Sandstone	515.19	519.6	False	462.0
1189	42913	IB-D2	http://ir.uiowa.edu/etd/3119	1147.0	26.0	1152.0	30.2	1161.0	71.4	98.79414298018949	sandstone	sedimentary	432	13132	3464	Bernadotte Sandstone Mbr	312.9333	313.8813	True	1147.0	Paleozoic*
1190	45596	U-Nankoweap	https://doi.org/10.1130/B31532.1	1163.0	26.0	1165.0	34.0	1168.0	44.2	99.57191780821918	sandstone	sedimentary	491	36857	9434	Nankoweap Fm	767.6	770.4	True	1163.0
1191	29069	PLR0110	10.1130/B30824.1	101.1	2.6	97.5	10.8	10.1	272.6	1000.990099009901	sandstone	sedimentary	515	15990	4229	Frontier Fm	95.022	100.5	True	101.1
1192	34918	44-FC06-2	10.1130/GES00982.1	1056.9	19.4	1086.5	38.0	1146.3	106.0	92.20099450405652	sandstone	sedimentary	825	22959	6465	Diablo Fm of Palm Spring Gp	2.588	4.0333	True	1056.9	Cenozoic
1193	28515	UT8A	10.1130/G30684.1	985.7	27.2	1007.2	24.0	1054.0	46.4	93.51992409867172	conglomerate	sedimentary	502	15469	4106	Cedar Mountain Fm	122.0	125.0	True	985.7	Mesozoic
1194	28874	07SD3a	10.1130/B30657.1	1179.0	102.0	1287.0	96.0	1472.0	170.0	80.09510869565217	sandstone	sedimentary	55	2029	313	Bliss Fm	483.475	493.575	True	1179.0	Cambrian
1195	34410	Rome1	10.1130/G20727.1	1071.0	28.0	1060.0	78.0	1036.0	36.0	103.37837837837839	sandstone	sedimentary	7	115	39	Rome Fm	511.0	514.75	True	1071.0	Cambrian
1196	29030	10ANK04	10.1130/B30818.1	111.0	6.0	105.0	16.0				sandstone	sedimentary	413	11096	2971	Valdez Gp	67.525	83.6	True	111.0
1197	29042	BHB0901	10.1130/B30824.1	95.5	2.4	104.8	26.6	322.0	606.4	29.658385093167702	sandstone	sedimentary	515	15990	4229	Frontier Fm	95.022	100.5	True	95.5
1198	29152	XOM-MDB-40	10.1130/G35513.1	1739.5	47.2	1761.6	27.6	1788.0	21.0	97.28747203579418	sandstone	sedimentary	434	11662	3146	Wilcox Fm	41.3	47.8	True	1788.0	Cenozoic
1199	37780	08-208	http://ir.uiowa.edu/etd/3496/	1458.0	44.0	1475.0	28.0	1498.0	26.0	97.32977303070761	sandstone	sedimentary	1571	35874	9069	Cranstone Fm	438.5	443.8	True	1498.0	Paleozoic*
1200	29187	XOM-MDB-77	10.1130/G35513.1	1712.6	29.8	1697.6	17.6	1679.1	14.8	101.9951164314216	sandstone	sedimentary	525	16766	4317	Frio Fm	22.3825	28.1	True	1679.1	Cenozoic
1201	34923	49-TBP79122	10.1130/GES00982.1	1521.7	127.0	1506.4	74.6	1485.1	29.8	102.46448050636322	sandstone	sedimentary	485	14891	3960	Browns Park Fm	3.347	13.27	True	1485.1	Cenozoic
1202	34718	C403730	10.1144/M35.37	1211.0	18.0			1164.0	60.0	104.03780068728523	sandstone	sedimentary	1534	35314	8899	Blind Fiord Fm	251.6755	251.902	True	1211.0	Mesozoic
1203	42086	C	10.1016/S0037-0738(03)00158-1	1016.0	80.0	1082.0	57.0	1217.0	23.0	83.48397699260477	sandstone	sedimentary	483	14781	3928	Glen Canyon Gp	170.3	201.3	True	1217.0	Mesozoic
1204	45595	K1252NAN2	https://doi.org/10.1130/B31532.1	1092.0	18.0	1091.0	24.0	1088.0	31.2	100.36764705882354	sandstone	sedimentary	491	36857	9434	Nankoweap Fm	767.6	770.4	True	1092.0
1205	43651	C-054337	10.1144/jgs2014-027	1045.0	35.0	1055.0	30.0	1104.0	31.0	94.65579710144928	sandstone	sedimentary	1562	35765	9021	Danish River Fm	427.4	438.5	True	1104.0	Paleozoic*
1206	28975	GC-Monteith_C	10.1130/B30671.1	622.0	29.0	617.3	27.2	600.4	70.8	103.59760159893403	sandstone	sedimentary	1626	37260	9550	Monteith Fm	139.8	146.775	True	622.0	Mesozoic
1207	43176	12-LHCC07	10.2110/jsr.2014.33	1104.1	34.5	1089.6	62.1	1060.8	174.1	104.08182503770739	sandstone	sedimentary	491	15052	4003	Wahweap Sandstone	84.275	87.175	True	1104.1	Mesozoic
1208	40688	JG09-05	10.2475/06.2015.02	1786.9	51.0	1786.8	28.2	1786.7	13.8	100.0111938210108	sandstone	sedimentary	414	11108	2980	Kodiak Fm	66.0	72.1	True	1786.7	Mesozoic
1209	37261	09LR01	10.1130/L557.1	1637.0	34.0			1839.0	22.0	89.015769439913	quartzite	metamorphic	325	8781	2219	Kinnikinic Quartzite	456.5	470.0	True	1839.0	Paleozoic*
1210	28974	GC-Monteith_A	10.1130/B30671.1	2031.1	143.6	2048.9	79.0	2066.9	62.8	98.26793749092845	sandstone	sedimentary	1626	37260	9550	Monteith Fm	139.8	146.775	True	2066.9	Mesozoic
1211	40365	EL2	10.1139/E06-010					2307.0	18.0		siliciclastic	sedimentary	195	6221	1492	Enchantment Lake Fm	2371.426	2435.713	True	2307.0
1212	29120	XOM-MDB-05	10.1130/G35513.1	969.6	75.6	1025.4	55.4	1146.4	33.8	84.5778087927425	sandstone	sedimentary	526	16848	4323	Lower Frio Mbr	26.8325	27.4663	True	1146.4	Cenozoic
1213	29120	XOM-MDB-05	10.1130/G35513.1	969.6	75.6	1025.4	55.4	1146.4	33.8	84.5778087927425	sandstone	sedimentary	526	16847	4323	Middle Frio Mbr	24.9313	26.8325	True	1146.4	Cenozoic
1214	29120	XOM-MDB-05	10.1130/G35513.1	969.6	75.6	1025.4	55.4	1146.4	33.8	84.5778087927425	sandstone	sedimentary	526	16846	4323	Upper Frio Mbr	24.2975	24.9313	True	1146.4	Cenozoic
1215	43171	12-PC04	10.2110/jsr.2014.33	1043.6	14.1	1044.5	30.0	1046.2	88.0	99.75148155228446	sandstone	sedimentary	491	15053	4003	Straight Cliffs Sandstone	87.175	95.55	True	1043.6	Mesozoic
1216	29065	MH0110	10.1130/B30824.1	1641.7	52.0	1674.5	30.2	1715.7	15.2	95.68689164772397	sandstone	sedimentary	515	15991	4229	Mowry Shale	100.5	125.0	True	1715.7	Mesozoic
1217	28862	CLA708	http://specialpapers.gsapubs.org/content/487/63.abstract	76.6	0.6	78.8	4.8	147.2	145.8	52.03804347826087	sandstone	sedimentary	332	9034	2282	Renova Fm	23.03	38.675	True	76.6
1218	28633	K061121	10.1130/G31335.1	2461.0	95.0	2464.9	49.8	2468.2	46.2	99.7082894416984	metasedimentary	metamorphic	491	15025	3995	Vishnu Schist	1690.0	1887.5	True	2468.2
1219	40234	12JT32	10.1130/L533.1	2570.0	110.0	2574.0	67.0	2586.0	80.0	99.38128383604021	sandstone	sedimentary	152	5332	1258	Neruokpuk Quartzite	541.0	598.375	True	2586.0	Cambrian
1220	40690	11CD-60	10.2475/06.2015.02	65.9	15.0	88.9	146.0	762.2	4716.8	8.646024665442141	sandstone	sedimentary	414	11107	2980	Ghost Rocks Fm	62.7	66.0	True	65.9
1221	34497	7809	10.1130/B25989.1	1698.0	40.0			1748.0	48.0	97.1395881006865	sandstone	sedimentary	757	22001	6028	Dunvegan	1326.25	1351.0	True	1698.0
1222	29062	GE0110	10.1130/B30824.1	107.8	4.8	107.3	15.0	96.2	331.0	112.05821205821206	sandstone	sedimentary	515	16010	4229	Muddy Sandstone Mbr	125.0	126.1	True	107.8
1223	37269	5TA09	10.1130/L557.1	1656.0	101.0	1709.0	76.0	1774.0	111.0	93.34836527621195	quartzite	metamorphic	325	8781	2219	Kinnikinic Quartzite	456.5	470.0	True	1656.0	Paleozoic*
1224	29188	XOM-MDB-78	10.1130/G35513.1	96.1	9.0	80.8	83.0				sandstone	sedimentary	518	16247	4268	Frio Fm	24.2975	28.1	True	96.1
1225	29192	51101	10.1130/B30999.1	959.4	36.0	970.9	27.4	997.0	34.9	96.22868605817452	sandstone	sedimentary	512	15908	8850	Lakota Fm	138.075	145.0	True	997.0	Mesozoic
1226	28654	4DB4	10.1130/B30235.1	1256.9	22.8	1340.5	93.4	1476.5	236.0	85.12698950220116	sandstone	sedimentary	510	15822	4187	Indian Meadows Fm	53.95	56.0	True	1256.9	Cenozoic
1227	29940	CG11-6	10.1130/GES00917.1	1199.0	16.0	1190.0	14.0	1179.6	46.7	101.64462529671076	sandstone	sedimentary	523	16616	4300	Cockfield Fm	37.8	38.675	True	1199.0	Cenozoic
1228	34439	RAR-00-06-zir	10.1130/B25564.1	173.8	3.8						sandstone	sedimentary	1498	34664	8674	Beaver Mines	109.875	122.0	True	173.8
1229	29188	XOM-MDB-78	10.1130/G35513.1	166.4	6.6	179.6	24.0	357.1	316.2	46.59759171100532	sandstone	sedimentary	518	16247	4268	Frio Fm	24.2975	28.1	True	166.4
1230	43201	CP44	10.2110/jsr.2008.088	542.8	10.4	541.7	34.0	537.2	171.6	101.04244229337306	sandstone	sedimentary	502	15475	4108	Chinle Fm	228.6667	230.3333	True	542.8	Mesozoic
1231	34014	CO13-Ec-1Jmt	10.1130/L467.1	693.1	9.7	709.1	23.2	759.9	90.7	91.20936965390183	sandstone	sedimentary	500	15412	4091	Morrison Fm	150.325	157.3	True	693.1	Mesozoic
1232	28508	UT0711	10.1130/G30684.1	1481.0	114.8	1597.3	75.0	1754.3	61.6	84.42113663569515	conglomerate	sedimentary	482	14737	3914	Indianola Gp	83.6	145.0	True	1754.3	Mesozoic
1233	45601	K065712	https://doi.org/10.1130/B31532.1	1125.0	70.0	1243.0	54.0	1454.0	91.0	77.37276478679505	sandstone	sedimentary	491	36854	9433	Carbon Canyon Member	748.0	753.6	False	1125.0
1234	29054	EB0210	10.1130/B30824.1	2421.3	58.4	2479.7	32.6	2527.9	33.6	95.78306103880692	sandstone	sedimentary	515	16008	4229	Mesaverde Fm	80.725	90.825	True	2527.9	Mesozoic
1235	28710	Toroweap1	10.1130/L121.1	1038.0	40.0	1069.0	34.0	1132.0	62.0	91.69611307420494	sandstone	sedimentary	491	15034	4000	Toroweap Fm	269.4875	275.2125	True	1038.0	Paleozoic*
1236	30823	22CS07	http://www.mbmg.mtech.edu/pdf-open-files/mbmg569/mbmg569.pdf	49.0	2.0						sandstone	sedimentary	332	9034	2282	Renova Fm	23.03	38.675	True	49.0
1237	42909	FCB-D3	http://ir.uiowa.edu/etd/3119	369.0	13.0	365.0	14.4	343.0	67.8	107.5801749271137	sandstone	sedimentary	80	2986	581	Cherokee Gp	310.5	317.25	True	369.0
1238	40665	LA3	10.1306/10191515029	417.9	16.2	417.0	16.4	411.8	58.8	101.48130160271977	sandstone	sedimentary	1625	37218	9542	McMurray Fm	111.75	125.0	True	417.9
1239	35266	41EAB10	10.1130/B30860.1	690.6	29.0	694.2	26.2	705.9	58.6	97.83255418614534	diamictite	sedimentary	477	14498	3843	Perry Canyon Fm	663.3331	668.0557	True	690.6
1240	29203	51207	10.1130/B30999.1	1596.7	22.4	1631.3	13.8	1676.0	11.4	95.26849642004774	sandstone	sedimentary	504	15545	4128	Blair Fm	90.825	92.875	False	1676.0
1241	29129	XOM-MDB-14	10.1130/G35513.1	983.5	18.6	999.9	16.0	1036.0	30.2	94.93243243243244	sandstone	sedimentary	527	16912	4331	Nanafalia Fm	56.8	58.1333	True	983.5	Cenozoic
1242	29129	XOM-MDB-14	10.1130/G35513.1	983.5	18.6	999.9	16.0	1036.0	30.2	94.93243243243244	sandstone	sedimentary	527	16911	4331	Tuscahoma Fm	54.975	56.8	True	983.5	Cenozoic
1243	29129	XOM-MDB-14	10.1130/G35513.1	983.5	18.6	999.9	16.0	1036.0	30.2	94.93243243243244	sandstone	sedimentary	527	16910	4331	Bashi Fm	53.95	54.975	True	983.5	Cenozoic
1244	29129	XOM-MDB-14	10.1130/G35513.1	983.5	18.6	999.9	16.0	1036.0	30.2	94.93243243243244	sandstone	sedimentary	527	16909	4331	Hatchetigbee Fm	52.925	53.95	True	983.5	Cenozoic
1245	29941	CG11-7	10.1130/GES00917.1	1416.0	52.0	1374.0	47.0	1304.1	85.0	108.58063031976074	sandstone	sedimentary	523	16618	4300	Sparta Fm	40.1333	40.7167	True	1416.0	Cenozoic
1246	42630	MS5	10.1086/669230	1108.5	10.5	1104.3	8.4	1096.1	14.0	101.13128364200347	sandstone	sedimentary	187	6133	6345	Mt Simon Fm	498.375	499.95	True	1108.5	Cambrian
1247	28511	UT1	10.1130/G30684.1	992.7	21.8	1019.4	26.6	1077.0	68.0	92.17270194986072	sandstone	sedimentary	479	14623	3884	Navajo Sandstone	170.3	201.3	True	992.7	Mesozoic
1248	29194	51103	10.1130/B30999.1	1343.0	43.6	1360.6	62.1	1388.5	143.3	96.72308246308967	sandstone	sedimentary	512	15909	8850	Morrison Fm	145.0	158.3334	True	1343.0	Mesozoic
1249	43192	CP8	10.2110/jsr.2008.088	244.0	10.6	243.6	33.4	240.0	342.0	101.66666666666667	sandstone	sedimentary	490	15005	3991	Moenkopi Fm	247.2	251.902	True	244.0
1250	40689	11SJO-42	10.2475/06.2015.02	220.6	12.4	217.2	57.6	180.6	675.2	122.1483942414175	sandstone	sedimentary	414	11107	2980	Ghost Rocks Fm	62.7	66.0	True	220.6
1251	28879	09MS1	10.1130/B30657.1	1512.0	54.0	1503.0	42.0	1490.0	66.0	101.47651006711409	arkose	sedimentary	53	1886	290	Bliss Fm	483.475	493.575	True	1512.0	Cambrian
1252	35696	Samp_02	10.1016/j.sedgeo.2005.07.014	873.7	15.4	920.8	30.0	1035.4	11.8	84.38284720880819	sandstone	sedimentary	301	7799	2027	Pottsville Gp	312.0	319.0	False	1035.4
1253	45605	06K5714	https://doi.org/10.1130/B31532.1	1162.0	32.0	1164.0	32.0	1169.0	41.6	99.40119760479043	sandstone	sedimentary	491	36852	9433	Carbon Butte Member	736.8	742.4	True	1162.0
1254	42088	E	10.1016/S0037-0738(03)00158-1	632.0	25.0	637.0	38.0	652.0	75.0	96.93251533742331	sandstone	sedimentary	495	15189	4029	Carmel Fm	166.1	176.25	True	632.0	Mesozoic
1255	42088	E	10.1016/S0037-0738(03)00158-1	632.0	25.0	637.0	38.0	652.0	75.0	96.93251533742331	sandstone	sedimentary	495	15188	4029	Entrada Fm	164.15	166.1	True	632.0	Mesozoic
1256	42088	E	10.1016/S0037-0738(03)00158-1	632.0	25.0	637.0	38.0	652.0	75.0	96.93251533742331	sandstone	sedimentary	495	15187	4029	Summerville Fm	157.3	164.15	True	632.0	Mesozoic
1257	42088	E	10.1016/S0037-0738(03)00158-1	632.0	25.0	637.0	38.0	652.0	75.0	96.93251533742331	sandstone	sedimentary	495	15186	4029	Curtis Fm	164.15	165.125	True	632.0	Mesozoic
1258	42088	E	10.1016/S0037-0738(03)00158-1	632.0	25.0	637.0	38.0	652.0	75.0	96.93251533742331	sandstone	sedimentary	495	15185	4029	Bluff Fm	157.3	161.95	True	632.0	Mesozoic
1259	43161	BENYON-356	10.2110/jsr.2014.16	2008.2	37.8	1995.6	43.8	1982.4	80.2	101.30145278450362	sandstone	sedimentary	1625	37218	9542	McMurray Fm	111.75	125.0	True	2008.2	Mesozoic
1260	33301	Mol9-6	http://www.scielo.org.mx/pdf/rmcg/v31n3/v31n3a8.pdf	1113.6	45.8	1158.8	34.0	1244.4	39.6	89.48891031822565	paragneiss	metamorphic	1419	33215	7745	Huiznopala Fm	1000.0	1200.0	True	1244.4
1261	29940	CG11-6	10.1130/GES00917.1	1147.0	27.0	1153.0	19.0	1160.1	24.7	98.87078700112059	sandstone	sedimentary	523	16616	4300	Cockfield Fm	37.8	38.675	True	1160.1	Cenozoic
1262	29132	XOM-MDB-19	10.1130/G35513.1	1072.7	27.8	1065.3	32.8	1050.3	82.8	102.13272398362373	sandstone	sedimentary	531	17122	4364	Wilcox Gp	53.2667	58.4	True	1072.7	Cenozoic
1263	40692	11SJO-34	10.2475/06.2015.02	101.0	33.8	90.9	146.8				sandstone	sedimentary	414	11105	2979	Sitkalidak Fm	32.595	42.925	True	101.0
1264	40922	DR1	10.2475/01.2007.05	1167.9	29.6			1161.0	110.0	100.59431524547804	metasedimentary	metamorphic	387	10587	2762	Hebron Gneiss	420.15	449.0	True	1167.9	Paleozoic*
1265	28716	BTC	10.1130/G31762.1	111.7	2.4	107.5	17.5	14.5	412.6	770.3448275862069	conglomerate	sedimentary	1641	37797	9719	Cadomin Fm	122.0	126.1	True	111.7
1266	34752	94CL53	10.1029/2005TC001830	1040.0	50.0	1094.0	55.0	1204.0	66.0	86.37873754152824	sandstone	sedimentary	155	5367	1272	Otuk Fm	168.8	247.2	True	1040.0	Mesozoic
1267	34005	TB3	10.1130/L451.1	181.4	8.4	170.0	60.0	15.0	932.0	1209.3333333333333	conglomerate	sedimentary	1454	33654	8226	Tantalus	126.1	150.325	True	181.4
1268	40690	11CD-60	10.2475/06.2015.02	63.9	9.0	61.8	23.6				sandstone	sedimentary	414	11107	2980	Ghost Rocks Fm	62.7	66.0	True	63.9
1269	42886	C-072382	10.1139/E10-006	1585.0	22.0	1586.0	14.0	1588.0	16.0	99.81108312342569	sandstone	sedimentary	1562	35779	9012	Isachsen Fm	113.0	126.1	True	1588.0	Mesozoic
1270	29115	XOM-AOS-25	10.1130/G35513.1	1340.7	33.2	1338.4	21.6	1334.8	18.2	100.44201378483667	sandstone	sedimentary	1625	37218	9542	McMurray Fm	111.75	125.0	True	1334.8	Mesozoic
1271	40696	RB12-04	10.2475/06.2015.02	2650.3	53.4	2620.1	25.4	2596.9	19.0	102.05629789364242	sandstone	sedimentary	413	11097	2972	Orca Gp	53.95	64.9	True	2596.9	Cenozoic
1272	40669	LB3	10.1306/10191515029	1061.3	36.8	1059.0	47.4	1054.3	124.2	100.66394764298587	sandstone	sedimentary	1625	37218	9542	McMurray Fm	111.75	125.0	True	1061.3	Mesozoic
1273	37269	5TA09	10.1130/L557.1	1847.0	11.0	1848.0	9.0	1849.0	15.0	99.89183342347215	quartzite	metamorphic	325	8781	2219	Kinnikinic Quartzite	456.5	470.0	True	1847.0	Paleozoic*
1274	42910	FCB-D4	http://ir.uiowa.edu/etd/3119	1120.0	34.6	1130.0	29.8	1151.0	55.4	97.30668983492615	sandstone	sedimentary	89	3399	688	Cherokee Gp	311.0	319.0	True	1120.0	Paleozoic*
1275	29138	XOM-MDB-25	10.1130/G35513.1	1030.4	21.2	1036.1	20.0	1048.1	43.0	98.3112298444805	sandstone	sedimentary	527	16912	4331	Nanafalia Fm	56.8	58.1333	True	1030.4	Cenozoic
1276	29138	XOM-MDB-25	10.1130/G35513.1	1030.4	21.2	1036.1	20.0	1048.1	43.0	98.3112298444805	sandstone	sedimentary	527	16911	4331	Tuscahoma Fm	54.975	56.8	True	1030.4	Cenozoic
1277	29138	XOM-MDB-25	10.1130/G35513.1	1030.4	21.2	1036.1	20.0	1048.1	43.0	98.3112298444805	sandstone	sedimentary	527	16910	4331	Bashi Fm	53.95	54.975	True	1030.4	Cenozoic
1278	29138	XOM-MDB-25	10.1130/G35513.1	1030.4	21.2	1036.1	20.0	1048.1	43.0	98.3112298444805	sandstone	sedimentary	527	16909	4331	Hatchetigbee Fm	52.925	53.95	True	1030.4	Cenozoic
1279	37799	EAH-11	http://cedar.wwu.edu/wwuet/356/	400.1	4.2	401.1	4.1	406.6	13.1	98.40137727496311	paragneiss	metamorphic	1446	33546	8154	Yellow Aster Complex Fm	458.4	508.5	True	400.1
1280	42909	FCB-D3	http://ir.uiowa.edu/etd/3119	1221.0	32.6	1228.0	25.2	1238.0	38.8	98.62681744749597	sandstone	sedimentary	80	2986	581	Cherokee Gp	310.5	317.25	True	1221.0	Paleozoic*
1281	34497	7809	10.1130/B25989.1	1655.0	60.0			1719.0	102.0	96.27690517742873	sandstone	sedimentary	757	22001	6028	Dunvegan	1326.25	1351.0	True	1655.0
1282	45382	JM16-77-1	10.1016/j.precamres.2017.03.006	1698.2	88.8	1710.7	50.4	1725.9	25.0	98.39504026884524	sandstone	sedimentary	491	36863	3996	Hotauta Conglomerate	1250.0	1254.0	True	1725.9
1283	45382	JM16-77-1	10.1016/j.precamres.2017.03.006	1698.2	88.8	1710.7	50.4	1725.9	25.0	98.39504026884524	sandstone	sedimentary	491	36862	3996	Bass Limestone	1244.0	1250.0	True	1725.9
1284	45382	JM16-77-1	10.1016/j.precamres.2017.03.006	1698.2	88.8	1710.7	50.4	1725.9	25.0	98.39504026884524	sandstone	sedimentary	491	36861	3996	Hakatai Shale	1180.0	1244.0	True	1725.9
1285	45382	JM16-77-1	10.1016/j.precamres.2017.03.006	1698.2	88.8	1710.7	50.4	1725.9	25.0	98.39504026884524	sandstone	sedimentary	491	36860	3996	Shinumo Quartzite	1140.0	1180.0	True	1725.9
1286	45382	JM16-77-1	10.1016/j.precamres.2017.03.006	1698.2	88.8	1710.7	50.4	1725.9	25.0	98.39504026884524	sandstone	sedimentary	491	36859	3996	Dox Sandstone	1108.0	1140.0	True	1725.9
1287	45382	JM16-77-1	10.1016/j.precamres.2017.03.006	1698.2	88.8	1710.7	50.4	1725.9	25.0	98.39504026884524	sandstone	sedimentary	491	36858	3996	Cardenas lavas	1100.0	1108.0	True	1725.9
1288	37470	OK-4	10.1130/GES01316.1	431.6	6.2	427.1	12.5	403.0	73.2	107.09677419354838	sandstone	sedimentary	158	5567	1306	Wellington Fm	279.7375	282.0	True	431.6
1289	28834	08-TH-05	10.1130/B30530.1	1118.0	34.0	1107.0	27.0	1085.0	48.0	103.04147465437788	sandstone	sedimentary	755	21969	6012	Glenelg	898.64	945.12	True	1118.0
1290	28834	08-TH-05	10.1130/B30530.1	1118.0	34.0	1107.0	27.0	1085.0	48.0	103.04147465437788	sandstone	sedimentary	755	21968	6012	Reynolds Point	880.16	898.64	True	1118.0
1291	28834	08-TH-05	10.1130/B30530.1	1118.0	34.0	1107.0	27.0	1085.0	48.0	103.04147465437788	sandstone	sedimentary	755	21967	6012	Minto	861.68	880.16	True	1118.0
1292	28834	08-TH-05	10.1130/B30530.1	1118.0	34.0	1107.0	27.0	1085.0	48.0	103.04147465437788	sandstone	sedimentary	755	21966	6012	Wynniatt	811.0	861.68	True	1118.0
1293	28834	08-TH-05	10.1130/B30530.1	1118.0	34.0	1107.0	27.0	1085.0	48.0	103.04147465437788	sandstone	sedimentary	755	21965	6012	Kilian	780.2	811.0	True	1118.0
1294	28598	COL-WRD	10.1130/G31250.1	157.8	9.4	176.5	129.8	435.9	1844.6	36.20096352374398	sandstone	sedimentary	502	15460	4104	Colton Fm	49.85	56.8	True	157.8
1295	28716	BTC	10.1130/G31762.1	1046.1	42.0	1082.3	30.7	1155.9	30.6	90.50090838307813	conglomerate	sedimentary	1641	37797	9719	Cadomin Fm	122.0	126.1	True	1155.9	Mesozoic
1296	34923	49-TBP79122	10.1130/GES00982.1	1159.9	64.4	1131.5	94.8	1077.4	250.8	107.65732318544644	sandstone	sedimentary	485	14891	3960	Browns Park Fm	3.347	13.27	True	1159.9	Cenozoic
1297	43200	CP42	10.2110/jsr.2008.088	989.6	25.1	1003.3	28.4	1033.4	70.9	95.76156377007935	sandstone	sedimentary	483	14779	3927	Chinle Fm	206.7	237.0	True	989.6	Mesozoic
1298	28691	06GC155	10.1130/L121.1	445.0	8.0	438.0	30.0	402.0	180.0	110.69651741293532	sandstone	sedimentary	491	15037	4000	Supai Fm	282.0	313.75	True	445.0
1299	29048	CCR0310	10.1130/B30824.1	956.0	33.4	975.0	24.6	1018.2	22.4	93.89118051463366	sandstone	sedimentary	515	15993	4229	Morrison Fm	145.0	158.354	True	1018.2	Mesozoic
1300	37461	K	10.1130/GES01313.1	1582.3	148.5	1605.7	134.2	1635.7	104.3	96.73534266674818	sandstone	sedimentary	520	16418	4285	Simsboro Sand Mbr	56.0	56.8	True	1635.7	Cenozoic
1301	28681	07NW2	10.1130/B30029.1	1071.8	15.9	1061.6	23.3	1040.8	63.4	102.97847809377402	siltstone	sedimentary	463	13837	3673	Newark Canyon Fm	113.0	122.0	True	1071.8	Mesozoic
1302	37798	EAH-10b	http://cedar.wwu.edu/wwuet/356/	413.8	6.8	416.3	9.4	430.6	48.3	96.09846725499304	paragneiss	metamorphic	1446	33546	8154	Yellow Aster Complex Fm	458.4	508.5	True	413.8
1303	28725	TFI	10.1130/G31762.1	599.0	19.4	588.6	18.4	548.7	51.1	109.16712228904684	conglomerate	sedimentary	487	16118	4252	Kootenai Fm	128.3	145.0	True	599.0	Mesozoic
1304	37463	SK	10.1130/GES01313.1	1827.0	68.6	1858.0	45.4	1892.6	57.5	96.5338687519814	sandstone	sedimentary	520	16418	4285	Simsboro Sand Mbr	56.0	56.8	True	1892.6	Cenozoic
1305	42912	IB-D1	http://ir.uiowa.edu/etd/3119	891.0	24.2	917.0	37.2	980.0	110.4	90.91836734693878	sandstone	sedimentary	432	13132	3464	Bernadotte Sandstone Mbr	312.9333	313.8813	True	891.0	Paleozoic*
1306	28834	08-TH-05	10.1130/B30530.1	2578.0	66.0	2636.0	30.0	2681.0	17.0	96.15814994405073	sandstone	sedimentary	755	21969	6012	Glenelg	898.64	945.12	True	2681.0
1307	28834	08-TH-05	10.1130/B30530.1	2578.0	66.0	2636.0	30.0	2681.0	17.0	96.15814994405073	sandstone	sedimentary	755	21968	6012	Reynolds Point	880.16	898.64	True	2681.0
1308	28834	08-TH-05	10.1130/B30530.1	2578.0	66.0	2636.0	30.0	2681.0	17.0	96.15814994405073	sandstone	sedimentary	755	21967	6012	Minto	861.68	880.16	True	2681.0
1309	28834	08-TH-05	10.1130/B30530.1	2578.0	66.0	2636.0	30.0	2681.0	17.0	96.15814994405073	sandstone	sedimentary	755	21966	6012	Wynniatt	811.0	861.68	True	2681.0
1310	28834	08-TH-05	10.1130/B30530.1	2578.0	66.0	2636.0	30.0	2681.0	17.0	96.15814994405073	sandstone	sedimentary	755	21965	6012	Kilian	780.2	811.0	True	2681.0
1311	40659	KE1	10.1306/10191515029	1051.4	35.2	1042.3	66.2	1023.4	192.0	102.7359781121751	sandstone	sedimentary	1625	37218	9542	McMurray Fm	111.75	125.0	True	1051.4	Mesozoic
1312	28729	6118	10.1130/B30260.1	398.9	8.2			442.7	29.8	90.10616670431443	sandstone	sedimentary	290	7514	1980	Fields Creek Fm	208.5	227.0	True	398.9
1313	35255	19AY11	10.1130/B30860.1	1407.7	17.0	1423.0	13.6	1445.9	21.8	97.35804689120963	slate	metamorphic	477	14498	3843	Perry Canyon Fm	663.3331	668.0557	True	1407.7
1314	33994	YGS08-MC091	10.1130/L451.1	199.0	8.0	199.0	8.0	191.0	42.0	104.18848167539267	sandstone	sedimentary	1454	33651	8228	Laberge	169.8	199.8	True	199.0
1315	37461	K	10.1130/GES01313.1	1458.9	127.3	1410.6	121.6	1338.2	108.3	109.01957853833508	sandstone	sedimentary	520	16418	4285	Simsboro Sand Mbr	56.0	56.8	True	1338.2	Cenozoic
1316	29199	51108	10.1130/B30999.1	546.2	24.7	548.2	41.1	556.4	184.9	98.1667864845435	sandstone	sedimentary	485	14877	3956	Morrison Fm	145.0	156.0	True	546.2	Mesozoic
1317	28513	UT4	10.1130/G30684.1	1942.4	76.4	1932.0	52.0	1920.8	70.6	101.12453144523116	conglomerate	sedimentary	502	15469	4106	Cedar Mountain Fm	122.0	125.0	True	1920.8	Mesozoic
1318	43652	C-054480	10.1144/jgs2014-027	868.0	18.0	887.0	17.0	935.0	14.0	92.83422459893048	sandstone	sedimentary	1566	35810	9042	Lands Lokk Fm	426.3	433.4	True	935.0	Paleozoic*
1319	29048	CCR0310	10.1130/B30824.1	422.4	10.4	436.7	15.6	512.6	79.2	82.40343347639485	sandstone	sedimentary	515	15993	4229	Morrison Fm	145.0	158.354	True	422.4
1320	43628	10687	10.1130/B30843.1	1221.0	26.0			1208.0	28.0	101.07615894039735	sandstone	sedimentary	1547	35591	8958	Danish River Fm	412.9	423.7333	True	1221.0	Paleozoic*
1321	43628	10687	10.1130/B30843.1	1221.0	26.0			1208.0	28.0	101.07615894039735	sandstone	sedimentary	1547	35590	8958	Danish River Fm	423.7333	424.4667	True	1221.0	Paleozoic*
1322	43628	10687	10.1130/B30843.1	1221.0	26.0			1208.0	28.0	101.07615894039735	sandstone	sedimentary	1547	35589	8958	Danish River Fm	424.4667	434.675	True	1221.0	Paleozoic*
1323	28718	EBK	10.1130/G31762.1	2038.6	8.7	2043.4	6.5	2048.2	9.5	99.53129577189728	conglomerate	sedimentary	1641	37797	9719	Cadomin Fm	122.0	126.1	True	2038.6	Mesozoic
1324	42907	FCB-D1	http://ir.uiowa.edu/etd/3119	1002.0	38.4	1006.0	31.0	1014.0	51.2	98.81656804733728	sandstone	sedimentary	90	3423	691	Cherokee Gp	311.0	319.0	True	1002.0	Paleozoic*
1325	29111	XOM-AOS-18	10.1130/G35513.1	193.3	4.6	193.8	7.8	200.0	85.2	96.65	sandstone	sedimentary	1625	37219	9542	Clearwater Fm	110.5	111.75	True	193.3
1326	37468	OK-1	10.1130/GES01316.1	1064.4	17.4	1062.8	14.5	1059.6	26.2	100.45300113250283	sandstone	sedimentary	158	5568	1306	Pontotoc Gp	282.0	300.1	True	1064.4	Paleozoic*
1327	28503	CP3	10.1130/G30684.1	549.3	165.2	631.0	400.0	529.9	83.2	103.66106812606152	sandstone	sedimentary	479	14623	3884	Navajo Sandstone	170.3	201.3	True	529.9
1328	45594	K1252NAN1	https://doi.org/10.1130/B31532.1	1986.0	30.0	1982.0	20.0	1979.0	14.0	100.35371399696817	sandstone	sedimentary	491	36857	9434	Nankoweap Fm	767.6	770.4	True	1979.0
1329	35317	GVG18	10.1130/G33746.1	186.4	2.8	167.6	60.6				sandstone	sedimentary	251	6864	1743	Lower Markley Sandstone Mbr	40.425	42.925	True	186.4
1330	35317	GVG18	10.1130/G33746.1	186.4	2.8	167.6	60.6				sandstone	sedimentary	251	6862	1743	Upper Markley Sandstone Mbr	37.8	38.675	True	186.4
1331	28635	KO69671	10.1130/G31335.1	2517.9	55.6	2516.0	80.6	2514.4	138.6	100.1391982182628	metasedimentary	metamorphic	491	15025	3995	Vishnu Schist	1690.0	1887.5	True	2517.9
1332	29326	568	10.1130/B31142.1	1524.9	72.8			1632.1	32.0	93.43177501378592	quartzite	metamorphic	459	13631	3603	Campito Fm	536.05	541.0	True	1632.1	Cambrian
1333	29055	EB0310	10.1130/B30824.1	1059.5	50.4	1055.9	42.2	1048.5	78.0	101.04911778731521	sandstone	sedimentary	515	15985	4229	Fort Union Fm	50.5333	66.0	True	1059.5	Mesozoic
1334	29146	XOM-MDB-34	10.1130/G35513.1	1317.3	32.2	1323.8	43.0	1334.3	99.4	98.72592370531365	sandstone	sedimentary	526	16848	4323	Lower Frio Mbr	26.8325	27.4663	True	1317.3	Cenozoic
1335	29146	XOM-MDB-34	10.1130/G35513.1	1317.3	32.2	1323.8	43.0	1334.3	99.4	98.72592370531365	sandstone	sedimentary	526	16847	4323	Middle Frio Mbr	24.9313	26.8325	True	1317.3	Cenozoic
1336	29146	XOM-MDB-34	10.1130/G35513.1	1317.3	32.2	1323.8	43.0	1334.3	99.4	98.72592370531365	sandstone	sedimentary	526	16846	4323	Upper Frio Mbr	24.2975	24.9313	True	1317.3	Cenozoic
1337	33995	04SJP594	10.1130/L451.1	196.8	23.0	210.0	34.0	354.0	318.0	55.59322033898305	conglomerate	sedimentary	1454	33651	8228	Laberge	169.8	199.8	True	196.8
1338	28870	04SASC	10.1130/B30657.1	1660.0	26.0	1656.0	22.0	1652.0	36.0	100.48426150121065	sandstone	sedimentary	55	2029	313	Bliss Fm	483.475	493.575	True	1660.0	Cambrian
1339	29107	XOM-AOS-09	10.1130/G35513.1	1376.9	26.8	1379.9	21.2	1384.7	34.8	99.43670109048891	sandstone	sedimentary	1625	37221	9542	Grand Rapids Fm	108.0	109.25	True	1376.9	Mesozoic
1340	28702	Lower_Hermit	10.1130/L121.1	1173.0	76.0	1176.0	74.0	1183.0	158.0	99.15469146238377	sandstone	sedimentary	491	15036	4000	Hermit Shale	279.7375	282.0	True	1173.0	Paleozoic*
1341	28868	REN108	http://specialpapers.gsapubs.org/content/487/63.abstract	81.8	0.8	81.7	6.0	80.1	179.7	102.1223470661673	sandstone	sedimentary	332	9034	2282	Renova Fm	23.03	38.675	True	81.8
1342	34016	CO13-EC-2Jw	10.1130/L467.1	1750.4	35.0	1729.3	20.1	1703.7	15.1	102.74109291541939	sandstone	sedimentary	494	15144	4022	Wanakah Fm	167.75	168.3	True	1703.7	Mesozoic
1343	45592	B-Nankoweap	https://doi.org/10.1130/B31532.1	1104.0	64.0	1126.0	44.0	1169.0	83.2	94.43969204448247	sandstone	sedimentary	491	36857	9434	Nankoweap Fm	767.6	770.4	True	1104.0
1344	28504	CP32	10.1130/G30684.1	1537.0	64.6	1512.6	105.8	1512.6	105.8	101.61311648816607	conglomerate	sedimentary	502	15469	4106	Cedar Mountain Fm	122.0	125.0	True	1537.0	Mesozoic
1345	29112	XOM-AOS-20	10.1130/G35513.1	165.3	16.2	155.5	74.6				sandstone	sedimentary	1625	37221	9542	Grand Rapids Fm	108.0	109.25	True	165.3
1346	29116	XOM-MDB-01	10.1130/G35513.1	1755.6	46.2	1704.5	29.0	1642.2	33.8	106.90537084398977	sandstone	sedimentary	526	16848	4323	Lower Frio Mbr	26.8325	27.4663	True	1642.2	Cenozoic
1347	29116	XOM-MDB-01	10.1130/G35513.1	1755.6	46.2	1704.5	29.0	1642.2	33.8	106.90537084398977	sandstone	sedimentary	526	16847	4323	Middle Frio Mbr	24.9313	26.8325	True	1642.2	Cenozoic
1348	29116	XOM-MDB-01	10.1130/G35513.1	1755.6	46.2	1704.5	29.0	1642.2	33.8	106.90537084398977	sandstone	sedimentary	526	16846	4323	Upper Frio Mbr	24.2975	24.9313	True	1642.2	Cenozoic
1349	29183	XOM-MDB-73	10.1130/G35513.1	447.6	9.4	450.4	16.6	464.6	89.0	96.34093844167026	sandstone	sedimentary	521	16441	4287	Wilcox Gp	49.85	58.4	True	447.6
1350	29192	51101	10.1130/B30999.1	188.4	28.1	187.0	128.3	170.0	1769.3	110.82352941176471	sandstone	sedimentary	512	15908	8850	Lakota Fm	138.075	145.0	True	188.4
1351	34004	TB1-TB2	10.1130/L451.1	216.0	7.0	240.0	72.0	477.0	744.0	45.283018867924525	sandstone	sedimentary	1454	33654	8226	Tantalus	126.1	150.325	True	216.0
1352	28728	6004	10.1130/B30260.1	372.8	14.8			364.2	61.8	102.36133992311917	sandstone	sedimentary	290	7516	1980	Vester Fm	227.0	237.0	True	372.8
1353	34177	05KP40	http://www.carleton.edu/departments/geol/Resources/comps/CompsPDFfiles/2006CompsPapers/Lundquist2006.pdf	1848.2	17.7	1854.6	32.8	1841.1	7.4	100.385639020151	slate	metamorphic	192	6169	1477	Tyler Fm	1825.0	1881.25	True	1841.1
1354	43169	BENYON-216	10.2110/jsr.2014.16	2233.7	29.2	2276.5	17.8	2315.2	20.6	96.47978576364893	sandstone	sedimentary	1625	37220	9542	Wabiskaw Fm	109.25	110.5	False	2315.2
1355	28576	T2	10.1130/B30120.1	1396.2	20.2	1378.2	41.9	1340.0	60.3	104.19402985074628	sandstone	sedimentary	1657	38191	9877	Imperial Fm	362.225	382.7	True	1396.2	Paleozoic*
1356	40703	JG10-30	10.2475/06.2015.02	72.8	10.6	81.6	44.4	347.7	1255.2	20.93758987633017	sandstone	sedimentary	413	11097	2972	Orca Gp	53.95	64.9	True	72.8
1357	35260	25EAB10	10.1130/B30860.1	1124.5	34.2	1129.4	34.6	1138.9	76.8	98.73562209149179	quartzite	metamorphic	477	14498	3843	Perry Canyon Fm	663.3331	668.0557	True	1124.5
1358	40918	ME-K	10.2475/01.2007.05	1277.9	19.6			1199.0	68.0	106.58048373644704	quartzite	metamorphic	385	10563	2747	Kittery Fm	448.05	450.0	True	1277.9	Paleozoic*
1359	32041	FF-07-4-1	10.1016/j.precamres.2012.10.010	1658.0	44.0			1639.0	24.0	101.15924344112264	sandstone	sedimentary	1658	38196	9882	Quartet Gp	1630.0	1636.0	True	1639.0
1360	28710	Toroweap1	10.1130/L121.1	1182.0	40.0	1192.0	32.0	1210.0	54.0	97.68595041322314	sandstone	sedimentary	491	15034	4000	Toroweap Fm	269.4875	275.2125	True	1182.0	Paleozoic*
1361	34004	TB1-TB2	10.1130/L451.1	189.6	5.2	196.0	18.0	271.0	216.0	69.96309963099631	sandstone	sedimentary	1454	33654	8226	Tantalus	126.1	150.325	True	189.6
1362	30833	7CS06	http://www.mbmg.mtech.edu/pdf-open-files/mbmg569/mbmg569.pdf	1682.0	36.0			1708.0	52.0	98.47775175644028	sandstone	sedimentary	332	9034	2282	Renova Fm	23.03	38.675	True	1682.0	Cenozoic
1363	34159	Parry6	10.1139/e2012-067	1387.2	19.2	1411.2	24.4	1350.5	16.8	102.71751203258053	sandstone	sedimentary	1521	35047	8834	Consett Head Mbr	361.1167	363.3333	True	1350.5	Paleozoic*
1364	34159	Parry6	10.1139/e2012-067	1387.2	19.2	1411.2	24.4	1350.5	16.8	102.71751203258053	sandstone	sedimentary	1521	35046	8834	Cape Fortune Mbr	363.3333	368.875	True	1350.5	Paleozoic*
1365	34159	Parry6	10.1139/e2012-067	1387.2	19.2	1411.2	24.4	1350.5	16.8	102.71751203258053	sandstone	sedimentary	1521	35045	8834	Burnett Point Mbr	368.875	374.5625	True	1350.5	Paleozoic*
1366	29130	XOM-MDB-17	10.1130/G35513.1	1034.7	19.4	1038.6	32.8	1046.7	93.2	98.85353969618802	sandstone	sedimentary	531	17122	4364	Wilcox Gp	53.2667	58.4	True	1034.7	Cenozoic
1367	35251	11EAB10	10.1130/B30860.1	1056.9	56.4	1059.5	38.6	1064.8	19.2	99.2580766341097	slate	metamorphic	477	14498	3843	Perry Canyon Fm	663.3331	668.0557	True	1064.8
1368	29188	XOM-MDB-78	10.1130/G35513.1	33.7	10.4	33.8	38.0	36.7	2841.6	91.82561307901908	sandstone	sedimentary	518	16247	4268	Frio Fm	24.2975	28.1	True	33.7
1369	28711	Toroweap2	10.1130/L121.1	603.0	30.0	621.0	32.0	690.0	98.0	87.3913043478261	sandstone	sedimentary	491	15034	4000	Toroweap Fm	269.4875	275.2125	True	603.0	Paleozoic*
1370	28654	4DB4	10.1130/B30235.1	2658.3	116.4	2668.9	63.0	2677.0	66.0	99.30145685468808	sandstone	sedimentary	510	15822	4187	Indian Meadows Fm	53.95	56.0	True	2677.0	Cenozoic
1371	34084	11270	10.1130/L517.1	2678.7	74.4			2796.3	13.6	95.79444265636734	sandstone	sedimentary	1531	35274	8890	King Christian Fm	176.25	184.725	True	2796.3	Mesozoic
1372	33949	12MP56	10.1130/L475.1	571.0	8.8	575.0	11.8	591.2	46.6	96.58322056833559	sandstone	sedimentary	425	11187	3018	Descon Fm	407.6	470.0	True	571.0	Paleozoic*
1373	29172	XOM-MDB-62	10.1130/G35513.1	34.6	4.4	37.2	34.4	208.0	2277.6	16.634615384615383	sandstone	sedimentary	518	16247	4268	Frio Fm	24.2975	28.1	True	34.6
1374	29074	W0108	10.1130/B30824.1	1898.1	39.8	1910.6	32.2	1924.1	51.0	98.64871888155501	sandstone	sedimentary	515	16006	4229	Willwood Fm	49.1667	53.95	True	1898.1	Cenozoic
1375	37468	OK-1	10.1130/GES01316.1	2720.1	21.0	2714.3	9.3	2710.0	4.1	100.37269372693727	sandstone	sedimentary	158	5568	1306	Pontotoc Gp	282.0	300.1	True	2710.0	Paleozoic*
1376	42087	D	10.1016/S0037-0738(03)00158-1	1955.0	93.0	1967.0	50.0	1981.0	18.0	98.68753154972237	sandstone	sedimentary	483	14781	3928	Glen Canyon Gp	170.3	201.3	True	1981.0	Mesozoic
1377	42628	MS3	10.1086/669230	1449.4	15.4	1446.2	14.3	1441.6	27.2	100.5410654827969	sandstone	sedimentary	187	6133	6345	Mt Simon Fm	498.375	499.95	True	1449.4	Cambrian
1378	40702	11HW-33	10.2475/06.2015.02	59.6	3.2	51.6	10.4				sandstone	sedimentary	413	11097	2972	Orca Gp	53.95	64.9	True	59.6
1379	42913	IB-D2	http://ir.uiowa.edu/etd/3119	610.0	18.2	606.0	38.8	589.0	171.8	103.56536502546689	sandstone	sedimentary	432	13132	3464	Bernadotte Sandstone Mbr	312.9333	313.8813	True	610.0	Paleozoic*
1380	34754	AE1	10.1029/2005TC001830	1095.0	31.0	1109.0	29.0	1135.0	30.0	96.47577092511013	sandstone	sedimentary	1545	35561	8952	Bjorne Fm	247.2	251.6755	True	1135.0	Mesozoic
1381	34084	11270	10.1130/L517.1	428.7	10.2			413.1	62.8	103.7763253449528	sandstone	sedimentary	1531	35274	8890	King Christian Fm	176.25	184.725	True	428.7
1382	43166	BENYON-190	10.2110/jsr.2014.16	1166.0	19.4	1161.4	28.0	1152.9	71.6	101.1362650706913	sandstone	sedimentary	1625	37218	9542	McMurray Fm	111.75	125.0	True	1166.0	Mesozoic
1383	29211	51218	10.1130/B30999.1	387.1	11.1	380.1	24.9	338.1	164.8	114.4927536231884	sandstone	sedimentary	491	15055	4003	Dakota Fm	95.55	100.5	True	387.1
1384	42912	IB-D1	http://ir.uiowa.edu/etd/3119	547.0	17.4	555.0	26.2	588.0	112.2	93.02721088435374	sandstone	sedimentary	432	13132	3464	Bernadotte Sandstone Mbr	312.9333	313.8813	True	547.0	Paleozoic*
1385	28684	3-24-04-3	10.1130/B30206.1	228.2	6.0	228.8	11.4	235.8	112.0	96.77692960135708	sandstone	sedimentary	35	2899	528	McCoy Mountains Fm	116.0	168.8	True	228.2
1386	42090	CO-151	http://gsabulletin.gsapubs.org/content/111/12/1876					1431.0	24.0		loess	sedimentary	497	15291	4056	White River Gp	32.45	34.875	True	1431.0	Cenozoic
1387	35328	Tyee	10.1130/G33746.1	181.0	26.0						sandstone	sedimentary	266	7121	1825	Tyee Fm	45.6334	46.7166	True	181.0
1388	28505	UT0602	10.1130/G30684.1	1694.9	29.8	1692.3	43.2	1689.2	89.6	100.33743784039783	sandstone	sedimentary	479	14623	3884	Navajo Sandstone	170.3	201.3	True	1694.9	Mesozoic
1389	30850	08MC36	http://digitalscholarship.unlv.edu/thesesdissertations/145	98.5	5.4	103.5	22.4				sandstone	sedimentary	468	14065	3728	Muddy Creek Fm	5.333	11.62	True	98.5
1390	45383	06GC154	10.1016/j.precamres.2017.03.006	1436.7	33.2	1446.8	31.2	1461.8	59.0	98.28293884252292	shale	sedimentary	491	36863	3996	Hotauta Conglomerate	1250.0	1254.0	True	1436.7
1391	45383	06GC154	10.1016/j.precamres.2017.03.006	1436.7	33.2	1446.8	31.2	1461.8	59.0	98.28293884252292	shale	sedimentary	491	36862	3996	Bass Limestone	1244.0	1250.0	True	1436.7
1392	45383	06GC154	10.1016/j.precamres.2017.03.006	1436.7	33.2	1446.8	31.2	1461.8	59.0	98.28293884252292	shale	sedimentary	491	36861	3996	Hakatai Shale	1180.0	1244.0	True	1436.7
1393	45383	06GC154	10.1016/j.precamres.2017.03.006	1436.7	33.2	1446.8	31.2	1461.8	59.0	98.28293884252292	shale	sedimentary	491	36860	3996	Shinumo Quartzite	1140.0	1180.0	True	1436.7
1394	45383	06GC154	10.1016/j.precamres.2017.03.006	1436.7	33.2	1446.8	31.2	1461.8	59.0	98.28293884252292	shale	sedimentary	491	36859	3996	Dox Sandstone	1108.0	1140.0	True	1436.7
1395	45383	06GC154	10.1016/j.precamres.2017.03.006	1436.7	33.2	1446.8	31.2	1461.8	59.0	98.28293884252292	shale	sedimentary	491	36858	3996	Cardenas lavas	1100.0	1108.0	True	1436.7
1396	34004	TB1-TB2	10.1130/L451.1	190.9	7.8	188.0	92.0	147.0	1268.0	129.8639455782313	sandstone	sedimentary	1454	33654	8226	Tantalus	126.1	150.325	True	190.9
1397	43161	BENYON-356	10.2110/jsr.2014.16	2367.2	66.2	2372.9	39.4	2377.8	46.2	99.55420977374044	sandstone	sedimentary	1625	37218	9542	McMurray Fm	111.75	125.0	True	2377.8	Mesozoic
1398	29942	CG11-8	10.1130/GES00917.1	75.4	1.5	76.0	2.2	84.4	92.6	89.33649289099526	sandstone	sedimentary	526	16840	4323	Lower Fleming Mbr	14.3575	28.1	True	75.4
1399	29942	CG11-8	10.1130/GES00917.1	75.4	1.5	76.0	2.2	84.4	92.6	89.33649289099526	sandstone	sedimentary	526	16839	4323	Middle Fleming Mbr	11.62	14.3575	True	75.4
1400	29942	CG11-8	10.1130/GES00917.1	75.4	1.5	76.0	2.2	84.4	92.6	89.33649289099526	sandstone	sedimentary	526	16838	4323	Upper Fleming Mbr	3.6	11.62	True	75.4
1401	28637	OS081084	10.1130/G31335.1	1825.7	39.2	1826.2	36.6	1826.8	64.6	99.93978541712283	metasedimentary	metamorphic	491	15025	3995	Vishnu Schist	1690.0	1887.5	True	1825.7
1402	43192	CP8	10.2110/jsr.2008.088	1353.3	85.4	1402.6	55.6	1478.0	40.0	91.56292286874154	sandstone	sedimentary	490	15005	3991	Moenkopi Fm	247.2	251.902	True	1478.0	Mesozoic
1403	30331	SG-40	10.1130/B31065.1	133.9	9.8	174.0	67.0				sandstone	sedimentary	570	18076	4646	San Emigdio Shale and Tejon Fm	36.825	47.8	True	133.9
1404	28971	Basal-Kootenay	10.1130/B30671.1	2343.9	60.8	2333.9	29.4	2325.1	15.6	100.8085673734463	sandstone	sedimentary	1641	37796	9718	Elk Fm	134.625	141.1	True	2325.1	Mesozoic
1405	28971	Basal-Kootenay	10.1130/B30671.1	2343.9	60.8	2333.9	29.4	2325.1	15.6	100.8085673734463	sandstone	sedimentary	1641	37795	9718	Mist Mountain Fm	141.1	146.1834	True	2325.1	Mesozoic
1406	28971	Basal-Kootenay	10.1130/B30671.1	2343.9	60.8	2333.9	29.4	2325.1	15.6	100.8085673734463	sandstone	sedimentary	1641	37794	9718	Morrissey Fm	146.1834	147.3666	True	2325.1	Mesozoic
1407	29064	HW1200108	10.1130/B30824.1	994.5	23.8	998.2	22.6	1006.3	49.4	98.82738745900825	sandstone	sedimentary	515	15992	4229	Cloverly Fm	130.275	145.0	True	994.5	Mesozoic
1408	30847	08MC20	http://digitalscholarship.unlv.edu/thesesdissertations/145	1404.4	37.4	1404.5	45.8	1404.6	100.4	99.98576107076748	sand	sedimentary	468	14065	3728	Muddy Creek Fm	5.333	11.62	True	1404.4	Cenozoic
1409	34002	C1	10.1130/L451.1	199.5	4.2	208.0	38.0	306.0	458.0	65.19607843137256	conglomerate	sedimentary	1454	33654	8226	Tantalus	126.1	150.325	True	199.5
1410	37754	07TH33B	10.1139/E10-056	1730.0	129.0	1756.0	128.0	1727.0	51.0	100.17371163867979	sandstone	sedimentary	1661	38282	9915	Imperial Fm	368.875	380.075	True	1727.0	Paleozoic*
1411	28697	Coconino2	10.1130/L121.1	1333.0	144.0	1368.0	94.0	1422.0	72.0	93.74120956399437	sandstone	sedimentary	491	15035	4000	Coconino Sandstone	275.2125	279.7375	True	1422.0	Paleozoic*
1412	28856	90707	http://specialpapers.gsapubs.org/content/487/13.abstract	229.0	1.7	225.7	20.5	191.4	235.2	119.64472309299896	sandstone	sedimentary	490	15003	3990	Chinle Fm	201.3	232.0	True	229.0
1413	40708	JG10-02	10.2475/06.2015.02	62.3	1.8	65.5	8.0	184.9	285.6	33.69388858842618	sandstone	sedimentary	416	11129	2990	Valdez Gp	66.0	100.5	True	62.3
1414	45601	K065712	https://doi.org/10.1130/B31532.1	1947.0	44.0	1955.0	54.0	1963.0	30.8	99.18492103922567	sandstone	sedimentary	491	36854	9433	Carbon Canyon Member	748.0	753.6	True	1963.0
1415	40664	LA2	10.1306/10191515029	1101.2	21.8	1092.1	25.4	1074.0	63.0	102.53258845437615	sandstone	sedimentary	1625	37218	9542	McMurray Fm	111.75	125.0	True	1101.2	Mesozoic
1416	29017	09KED24	10.1130/B30818.1	149.0	10.0	169.0	60.0				sandstone	sedimentary	413	11096	2971	Valdez Gp	67.525	83.6	True	149.0
1417	29048	CCR0310	10.1130/B30824.1	2737.2	124.8	2776.6	53.4	2805.3	8.0	97.5724521441557	sandstone	sedimentary	515	15993	4229	Morrison Fm	145.0	158.354	True	2805.3	Mesozoic
1418	40660	KE2	10.1306/10191515029	981.8	64.0	994.7	45.8	1023.2	63.8	95.95387021110243	sandstone	sedimentary	1625	37218	9542	McMurray Fm	111.75	125.0	True	1023.2	Mesozoic
1419	35339	CB55	http://scielo.unam.mx/pdf/rmcg/v23n3/v23n3a2.pdf	532.0	10.0	512.0	20.0	423.0	106.0	125.76832151300236	sandstone	sedimentary	1431	33135	7741	Santa Rosa	304.975	317.125	True	532.0
1420	35339	CB55	http://scielo.unam.mx/pdf/rmcg/v23n3/v23n3a2.pdf	532.0	10.0	512.0	20.0	423.0	106.0	125.76832151300236	sandstone	sedimentary	1431	33134	7740	Santa Rosa	332.125	349.975	True	532.0
1421	29182	XOM-MDB-72	10.1130/G35513.1	105.8	5.8	107.0	12.0	132.1	247.4	80.09084027252082	sandstone	sedimentary	521	16441	4287	Wilcox Gp	49.85	58.4	True	105.8
1422	28686	3-25-04-4	10.1130/B30206.1	1635.2	55.4	1639.3	44.0	1644.5	71.0	99.43447856491335	sandstone	sedimentary	35	2899	528	McCoy Mountains Fm	116.0	168.8	True	1635.2	Mesozoic
1423	29936	CG11-2	10.1130/GES00917.1	166.1	2.5	170.2	3.9	203.8	52.8	81.50147203140334	sandstone	sedimentary	525	16764	4317	Catahoula Fm	20.44	26.41	True	166.1
1424	29105	XOM-AOS-06	10.1130/G35513.1	396.8	11.2	402.7	27.2	436.8	170.0	90.84249084249085	sandstone	sedimentary	1625	37219	9542	Clearwater Fm	110.5	111.75	True	396.8
1425	28578	T4	10.1130/B30120.1	1797.0	41.4	1770.5	77.5	1797.2	82.7	99.98887157801023	sandstone	sedimentary	1657	38191	9877	Imperial Fm	362.225	382.7	True	1797.0	Paleozoic*
1426	45596	U-Nankoweap	https://doi.org/10.1130/B31532.1	1061.0	46.0	1083.0	38.0	1127.0	59.8	94.14374445430346	sandstone	sedimentary	491	36857	9434	Nankoweap Fm	767.6	770.4	True	1061.0
1427	29107	XOM-AOS-09	10.1130/G35513.1	450.9	14.0	455.6	21.0	479.3	104.4	94.07469225954517	sandstone	sedimentary	1625	37221	9542	Grand Rapids Fm	108.0	109.25	True	450.9
1428	42906	FCB-AD	http://ir.uiowa.edu/etd/3119	977.0	35.4	979.0	32.8	983.0	70.6	99.38962360122075	sandstone	sedimentary	90	3423	691	Cherokee Gp	311.0	319.0	True	977.0	Paleozoic*
1429	40666	LA4	10.1306/10191515029	1420.9	45.2	1414.3	78.8	1404.4	186.0	101.17487895186557	sandstone	sedimentary	1625	37218	9542	McMurray Fm	111.75	125.0	True	1420.9	Mesozoic
1430	29120	XOM-MDB-05	10.1130/G35513.1	57.8	4.8	54.6	24.4				sandstone	sedimentary	526	16848	4323	Lower Frio Mbr	26.8325	27.4663	True	57.8
1431	29120	XOM-MDB-05	10.1130/G35513.1	57.8	4.8	54.6	24.4				sandstone	sedimentary	526	16847	4323	Middle Frio Mbr	24.9313	26.8325	True	57.8
1432	29120	XOM-MDB-05	10.1130/G35513.1	57.8	4.8	54.6	24.4				sandstone	sedimentary	526	16846	4323	Upper Frio Mbr	24.2975	24.9313	True	57.8
1433	29155	XOM-MDB-44	10.1130/G35513.1	1012.7	27.0	1009.6	49.8	1002.8	146.6	100.9872357399282	sandstone	sedimentary	165	5752	1344	Wilcox Gp	41.3	56.0	True	1012.7	Cenozoic
1434	43195	CP18	10.2110/jsr.2008.088	292.1	6.4	305.0	19.6	405.0	160.0	72.12345679012346	sandstone	sedimentary	490	15003	3990	Chinle Fm	201.3	232.0	True	292.1
1435	29941	CG11-7	10.1130/GES00917.1	1000.0	55.0	1008.0	40.0	994.4	92.8	100.56315366049878	sandstone	sedimentary	523	16618	4300	Sparta Fm	40.1333	40.7167	True	1000.0	Cenozoic
1436	37469	OK-2	10.1130/GES01316.1	1851.7	22.5	1823.7	12.4	1791.8	7.5	103.34300703203483	sandstone	sedimentary	158	5568	1306	Pontotoc Gp	282.0	300.1	False	1791.8
1437	41552	61206-1	10.2475/05.2010.01	443.8	4.6						quartzite	metamorphic	377	10409	2689	Waits River Fm	412.9	424.1	True	443.8
1438	34082	11242	10.1130/L517.1	2071.2	56.0			2116.7	30.4	97.85042755232202	sandstone	sedimentary	1557	35708	8991	Heiberg Fm	188.775	213.125	True	2116.7	Mesozoic
1439	42910	FCB-D4	http://ir.uiowa.edu/etd/3119	1957.0	49.2	1983.0	30.4	2009.0	34.0	97.41164758586362	sandstone	sedimentary	89	3399	688	Cherokee Gp	311.0	319.0	True	2009.0	Paleozoic*
1440	29192	51101	10.1130/B30999.1	1593.6	67.1	1656.5	42.9	1737.2	41.1	91.73382454524523	sandstone	sedimentary	512	15908	8850	Lakota Fm	138.075	145.0	True	1737.2	Mesozoic
1441	29155	XOM-MDB-44	10.1130/G35513.1	1086.1	75.8	1111.5	52.8	1161.5	37.6	93.50839431769263	sandstone	sedimentary	165	5752	1344	Wilcox Gp	41.3	56.0	True	1161.5	Cenozoic
1442	29940	CG11-6	10.1130/GES00917.1	96.3	2.1	96.8	2.4	115.0	44.4	83.73913043478261	sandstone	sedimentary	523	16616	4300	Cockfield Fm	37.8	38.675	True	96.3
1443	29063	HB0110	10.1130/B30824.1	1633.5	54.4	1629.6	32.0	1624.6	20.8	100.54782715745414	sandstone	sedimentary	515	16004	4229	Goose Egg Fm	278.9834	280.4916	True	1624.6	Paleozoic*
1444	37460	H	10.1130/GES01313.1	1749.7	72.1	1728.0	54.5	1701.7	77.9	102.82070870306164	sandstone	sedimentary	520	16419	4285	Hooper Mbr	56.8	58.1333	True	1749.7	Cenozoic
1445	43171	12-PC04	10.2110/jsr.2014.33	1657.6	27.0	1674.9	15.5	1696.7	7.2	97.69552661047916	sandstone	sedimentary	491	15053	4003	Straight Cliffs Sandstone	87.175	95.55	True	1696.7	Mesozoic
1446	28641	OS0884	10.1130/G31335.1	3438.8	213.8	3423.7	94.6	3414.9	83.0	100.69987408123225	metasedimentary	metamorphic	491	15025	3995	Vishnu Schist	1690.0	1887.5	True	3414.9
1447	43188	CUR	10.2110/jsr.2008.088	299.1	7.4	284.4	56.0	164.8	525.8	181.49271844660194	sandstone	sedimentary	462	13759	3653	Chinle Fm	201.3	234.5	True	299.1
1448	29211	51218	10.1130/B30999.1	1717.4	39.5	1708.3	25.5	1697.2	30.0	101.19019561630923	sandstone	sedimentary	491	15055	4003	Dakota Fm	95.55	100.5	True	1697.2	Mesozoic
1449	42088	E	10.1016/S0037-0738(03)00158-1	2627.0	120.0	2815.0	56.0	2952.0	19.0	88.99051490514906	sandstone	sedimentary	495	15189	4029	Carmel Fm	166.1	176.25	False	2952.0
1450	42088	E	10.1016/S0037-0738(03)00158-1	2627.0	120.0	2815.0	56.0	2952.0	19.0	88.99051490514906	sandstone	sedimentary	495	15188	4029	Entrada Fm	164.15	166.1	False	2952.0
1451	42088	E	10.1016/S0037-0738(03)00158-1	2627.0	120.0	2815.0	56.0	2952.0	19.0	88.99051490514906	sandstone	sedimentary	495	15187	4029	Summerville Fm	157.3	164.15	False	2952.0
1452	42088	E	10.1016/S0037-0738(03)00158-1	2627.0	120.0	2815.0	56.0	2952.0	19.0	88.99051490514906	sandstone	sedimentary	495	15186	4029	Curtis Fm	164.15	165.125	False	2952.0
1453	42088	E	10.1016/S0037-0738(03)00158-1	2627.0	120.0	2815.0	56.0	2952.0	19.0	88.99051490514906	sandstone	sedimentary	495	15185	4029	Bluff Fm	157.3	161.95	False	2952.0
1454	29175	XOM-MDB-65	10.1130/G35513.1	1946.5	59.4	1914.8	33.8	1880.7	30.8	103.49869729356091	sandstone	sedimentary	519	16319	4277	Wilcox Fm	49.85	53.95	True	1880.7	Cenozoic
1455	43198	CP28	10.2110/jsr.2008.088	507.9	10.2	497.8	60.2	451.4	336.4	112.51661497563137	sandstone	sedimentary	488	14921	3971	Santa Rosa Sandstone	229.5	237.0	True	507.9
1456	43171	12-PC04	10.2110/jsr.2014.33	1727.5	39.3	1692.0	43.6	1648.3	85.7	104.80495055511739	sandstone	sedimentary	491	15053	4003	Straight Cliffs Sandstone	87.175	95.55	True	1727.5	Mesozoic
1457	37801	EAH-39	http://cedar.wwu.edu/wwuet/356/	2641.4	54.9	2682.8	25.1	2714.2	13.7	97.31781003610641	metasedimentary	metamorphic	1446	33546	8154	Yellow Aster Complex Fm	458.4	508.5	True	2714.2	Cambrian
1458	34014	CO13-Ec-1Jmt	10.1130/L467.1	1188.8	66.5	1178.6	44.6	1159.9	36.6	102.49159410293991	sandstone	sedimentary	500	15412	4091	Morrison Fm	150.325	157.3	True	1159.9	Mesozoic
1459	43616	10088	10.1130/B30843.1	1272.0	26.0			1307.0	40.0	97.3221117061974	sandstone	sedimentary	1572	35879	9073	Lorimer Ridge Fm	444.0333	444.2667	True	1272.0	Paleozoic*
1460	28714	1GR100	10.1130/G31762.1	2080.0	34.3	2087.1	23.6	2094.5	32.2	99.30771067080448	conglomerate	sedimentary	487	16118	4252	Kootenai Fm	128.3	145.0	True	2094.5	Mesozoic
1461	29038	560110	10.1130/B30824.1	95.9	9.8	94.9	34.8	71.3	885.4	134.50210378681626	sandstone	sedimentary	515	15990	4229	Frontier Fm	95.022	100.5	True	95.9
1462	28860	CHA108	http://specialpapers.gsapubs.org/content/487/63.abstract	99.4	0.5	95.3	4.3				sandstone	sedimentary	332	9034	2282	Renova Fm	23.03	38.675	True	99.4
1463	28676	05SP14-20	10.1130/B30029.1	1290.5	11.7	1292.3	20.0	1295.3	49.4	99.62942947579711	conglomerate	sedimentary	465	13948	3704	Sheep Pass Fm	34.875	46.175	True	1290.5	Cenozoic
1464	40673	LL4	10.1306/10191515029	2035.3	151.2	2069.9	78.0	2104.6	30.8	96.70721277202318	sandstone	sedimentary	1625	37218	9542	McMurray Fm	111.75	125.0	True	2104.6	Mesozoic
1465	37469	OK-2	10.1130/GES01316.1	1178.9	16.5	1169.5	11.8	1152.2	14.7	102.31730602325985	sandstone	sedimentary	158	5568	1306	Pontotoc Gp	282.0	300.1	True	1152.2	Paleozoic*
1466	42910	FCB-D4	http://ir.uiowa.edu/etd/3119	1029.0	25.6	1018.0	29.8	995.0	76.8	103.41708542713567	sandstone	sedimentary	89	3399	688	Cherokee Gp	311.0	319.0	True	1029.0	Paleozoic*
1467	29940	CG11-6	10.1130/GES00917.1	1030.0	12.0	1042.4	8.3	1063.9	21.8	96.81361030172009	sandstone	sedimentary	523	16616	4300	Cockfield Fm	37.8	38.675	True	1030.0	Cenozoic
1468	28682	07SR1	10.1130/B30029.1	33.6	0.3	30.4	3.0				conglomerate	sedimentary	465	13941	3704	Needles Range Fm	26.072	26.579	False	33.6
1469	28505	UT0602	10.1130/G30684.1	1117.0	35.2	1102.8	49.0	1074.9	129.0	103.91664340868918	sandstone	sedimentary	479	14623	3884	Navajo Sandstone	170.3	201.3	True	1117.0	Mesozoic
1470	29116	XOM-MDB-01	10.1130/G35513.1	1057.2	33.6	1053.2	52.8	1044.7	146.8	101.19651574614721	sandstone	sedimentary	526	16848	4323	Lower Frio Mbr	26.8325	27.4663	True	1057.2	Cenozoic
1471	29116	XOM-MDB-01	10.1130/G35513.1	1057.2	33.6	1053.2	52.8	1044.7	146.8	101.19651574614721	sandstone	sedimentary	526	16847	4323	Middle Frio Mbr	24.9313	26.8325	True	1057.2	Cenozoic
1472	29116	XOM-MDB-01	10.1130/G35513.1	1057.2	33.6	1053.2	52.8	1044.7	146.8	101.19651574614721	sandstone	sedimentary	526	16846	4323	Upper Frio Mbr	24.2975	24.9313	True	1057.2	Cenozoic
1473	40671	LL2	10.1306/10191515029	1065.0	21.4	1067.7	15.6	1073.2	18.0	99.23592992918375	sandstone	sedimentary	1625	37218	9542	McMurray Fm	111.75	125.0	True	1073.2	Mesozoic
1474	43193	CP11	10.2110/jsr.2008.088	287.8	49.0	349.9	58.2	786.0	194.0	36.61577608142493	sandstone	sedimentary	491	15048	4002	Chinle Fm	201.3	232.0	True	287.8
1475	28864	FP209	http://specialpapers.gsapubs.org/content/487/63.abstract	2443.4	44.8	2435.3	20.5	2428.4	4.5	100.61769066051721	sandstone	sedimentary	332	9034	2282	Renova Fm	23.03	38.675	True	2428.4	Cenozoic
1476	42885	C-86116	10.1139/E10-006	2442.0	56.0	2473.0	34.0	2498.0	38.0	97.7582065652522	sandstone	sedimentary	1541	35486	8934	Isachsen Fm	116.0	126.1	True	2498.0	Mesozoic
1477	34016	CO13-EC-2Jw	10.1130/L467.1	524.2	12.1	525.2	37.6	529.7	194.3	98.96167642061545	sandstone	sedimentary	494	15144	4022	Wanakah Fm	167.75	168.3	True	524.2
1478	28654	4DB4	10.1130/B30235.1	934.5	21.4	967.7	52.2	1043.8	162.0	89.52864533435525	sandstone	sedimentary	510	15822	4187	Indian Meadows Fm	53.95	56.0	True	934.5	Cenozoic
1479	28515	UT8A	10.1130/G30684.1	1343.3	12.2	1345.4	22.8	1348.6	56.0	99.60699985169806	conglomerate	sedimentary	502	15469	4106	Cedar Mountain Fm	122.0	125.0	True	1343.3	Mesozoic
1480	43193	CP11	10.2110/jsr.2008.088	236.5	10.2	240.8	95.2	283.0	1022.0	83.56890459363957	sandstone	sedimentary	491	15048	4002	Chinle Fm	201.3	232.0	True	236.5
1481	35703	11RMSS5	10.1016/j.precamres.2014.06.005	1388.3	20.4	1384.7	44.8	1379.2	109.4	100.65980278422273	greywacke	sedimentary	464	13874	3691	Beck Spring Dolomite	677.5	686.0	True	1388.3
1482	29143	XOM-MDB-31	10.1130/G35513.1	1037.8	50.6	1046.8	42.6	1065.7	76.8	97.38200243971099	sandstone	sedimentary	451	13078	3452	Wilcox Fm	49.85	56.8	True	1037.8	Cenozoic
1483	34459	14PL03	10.1130/B25896.1	51.7	1.8						sandstone	sedimentary	295	7491	1975	Poison Creek Fm	11.62	12.17	True	51.7
1484	34913	39-FC126	10.1130/GES00982.1	247.6	6.6	248.6	19.2				sandstone	sedimentary	222	6547	1598	Imperial Fm	3.347	4.0333	True	247.6
1485	43653	C-194771	10.1144/jgs2014-027	2613.0	61.0	2615.0	50.0	2649.0	47.0	98.64099660249151	sandstone	sedimentary	1566	35810	9042	Lands Lokk Fm	426.3	433.4	True	2649.0	Paleozoic*
1486	34566	767-2	10.1130/B26399.1	118.4	6.2						greywacke	sedimentary	243	6852	1738	Franciscan Subduction Complex	59.2	153.4	True	118.4
1487	28876	08FM10-LA	10.1130/B30657.1	503.0	24.0	500.0	40.0	485.0	192.0	103.71134020618557	sandstone	sedimentary	52	1873	281	Bliss Fm	483.475	493.575	True	503.0
1488	28833	07-YHL-44	10.1130/B30530.1	1468.0	47.0	1485.0	48.0	1501.0	19.0	97.80146568954031	sandstone	sedimentary	1653	38100	9839	Saline River Fm	501.0	503.5	True	1501.0	Cambrian
1489	28530	IONA	10.1130/G30509.1	1708.3	52.8	1732.8	29.8	1762.5	12.4	96.92482269503546	sandstone	sedimentary	429	11400	3071	Red and Green Beds	308.1	309.9	True	1762.5	Paleozoic*
1490	35246	1103NC1	10.1130/B30848.1	1026.8	28.8	1034.7	26.2	1051.4	53.2	97.66026250713334	sandstone	sedimentary	1658	38206	9884	Keele Fm	656.25	666.875	True	1026.8
1491	45594	K1252NAN1	https://doi.org/10.1130/B31532.1	1117.0	36.0	1118.0	38.0	1119.0	49.4	99.8212689901698	sandstone	sedimentary	491	36857	9434	Nankoweap Fm	767.6	770.4	True	1117.0
1492	29210	51214	10.1130/B30999.1	1482.2	26.0	1463.9	23.6	1437.5	44.4	103.1095652173913	sandstone	sedimentary	509	15780	4175	Morrison Fm	145.0	158.85	True	1482.2	Mesozoic
1493	29936	CG11-2	10.1130/GES00917.1	1010.0	25.0	1014.0	21.0	1049.6	44.4	96.22713414634147	sandstone	sedimentary	525	16764	4317	Catahoula Fm	20.44	26.41	True	1010.0	Cenozoic
1494	42088	E	10.1016/S0037-0738(03)00158-1	577.0	18.0	581.0	114.0	596.0	293.0	96.81208053691275	sandstone	sedimentary	495	15189	4029	Carmel Fm	166.1	176.25	True	577.0	Mesozoic
1495	42088	E	10.1016/S0037-0738(03)00158-1	577.0	18.0	581.0	114.0	596.0	293.0	96.81208053691275	sandstone	sedimentary	495	15188	4029	Entrada Fm	164.15	166.1	True	577.0	Mesozoic
1496	42088	E	10.1016/S0037-0738(03)00158-1	577.0	18.0	581.0	114.0	596.0	293.0	96.81208053691275	sandstone	sedimentary	495	15187	4029	Summerville Fm	157.3	164.15	True	577.0	Mesozoic
1497	42088	E	10.1016/S0037-0738(03)00158-1	577.0	18.0	581.0	114.0	596.0	293.0	96.81208053691275	sandstone	sedimentary	495	15186	4029	Curtis Fm	164.15	165.125	True	577.0	Mesozoic
1498	42088	E	10.1016/S0037-0738(03)00158-1	577.0	18.0	581.0	114.0	596.0	293.0	96.81208053691275	sandstone	sedimentary	495	15185	4029	Bluff Fm	157.3	161.95	True	577.0	Mesozoic
1499	43193	CP11	10.2110/jsr.2008.088	1633.7	36.4	1670.9	23.6	1718.0	26.0	95.09313154831199	sandstone	sedimentary	491	15048	4002	Chinle Fm	201.3	232.0	True	1718.0	Mesozoic
1500	42084	A	10.1016/S0037-0738(03)00158-1	2807.0	117.0	2834.0	52.0	2854.0	17.0	98.3531885073581	sandstone	sedimentary	494	15139	4020	Cutler Fm	269.4875	298.9	True	2854.0	Paleozoic*
1501	40663	LA1	10.1306/10191515029	1050.9	34.2	1040.0	31.6	1017.3	67.6	103.30286051312297	sandstone	sedimentary	1625	37218	9542	McMurray Fm	111.75	125.0	True	1050.9	Mesozoic
1502	34157	Blackley2	10.1139/e2012-067	2493.2	19.0	2410.6	35.3	2561.3	11.0	97.34119392495998	sandstone	sedimentary	1519	35002	8813	Blackley Fm	389.1	391.9	False	2561.3
1503	40918	ME-K	10.2475/01.2007.05	951.3	21.0			890.0	138.0	106.8876404494382	quartzite	metamorphic	385	10563	2747	Kittery Fm	448.05	450.0	True	951.3	Paleozoic*
1504	29128	XOM-MDB-13	10.1130/G35513.1	443.3	11.2	450.6	16.6	488.2	82.8	90.80294961081523	sandstone	sedimentary	527	16912	4331	Nanafalia Fm	56.8	58.1333	True	443.3
1505	29128	XOM-MDB-13	10.1130/G35513.1	443.3	11.2	450.6	16.6	488.2	82.8	90.80294961081523	sandstone	sedimentary	527	16911	4331	Tuscahoma Fm	54.975	56.8	True	443.3
1506	29128	XOM-MDB-13	10.1130/G35513.1	443.3	11.2	450.6	16.6	488.2	82.8	90.80294961081523	sandstone	sedimentary	527	16910	4331	Bashi Fm	53.95	54.975	True	443.3
1507	29128	XOM-MDB-13	10.1130/G35513.1	443.3	11.2	450.6	16.6	488.2	82.8	90.80294961081523	sandstone	sedimentary	527	16909	4331	Hatchetigbee Fm	52.925	53.95	True	443.3
1508	34916	42-FC05-3	10.1130/GES00982.1	1792.8	99.0	1756.4	66.8	1713.4	89.8	104.63406093148127	sandstone	sedimentary	825	22963	6465	Mud Hills Mbr of Deguynos Fm	4.7553	5.0442	True	1713.4	Cenozoic
1509	34916	42-FC05-3	10.1130/GES00982.1	1792.8	99.0	1756.4	66.8	1713.4	89.8	104.63406093148127	sandstone	sedimentary	825	22962	6465	Yuha Mbr of Deguynos Fm	4.2499	4.8998	True	1713.4	Cenozoic
1510	34916	42-FC05-3	10.1130/GES00982.1	1792.8	99.0	1756.4	66.8	1713.4	89.8	104.63406093148127	sandstone	sedimentary	825	22961	6465	Camels Head Mbr of Deguynos Fm	4.0333	4.2499	True	1713.4	Cenozoic
1511	34916	42-FC05-3	10.1130/GES00982.1	1792.8	99.0	1756.4	66.8	1713.4	89.8	104.63406093148127	sandstone	sedimentary	825	22960	6465	Jackson Fork Mbr of Deguynos Fm	3.8166	4.7553	True	1713.4	Cenozoic
1512	40689	11SJO-42	10.2475/06.2015.02	73.3	1.4	75.4	7.6	143.7	242.6	51.00904662491301	sandstone	sedimentary	414	11107	2980	Ghost Rocks Fm	62.7	66.0	True	73.3
1513	43170	12-LHCC01	10.2110/jsr.2014.33	84.0	1.7	84.4	9.3	97.3	266.5	86.33093525179856	sandstone	sedimentary	491	15053	4003	Straight Cliffs Sandstone	87.175	95.55	True	84.0
1514	28883	10BM216	10.1130/B30657.1	1309.0	106.0	1359.0	72.0	1439.0	58.0	90.96594857539958	sandstone	sedimentary	52	1873	281	Bliss Fm	483.475	493.575	True	1439.0	Cambrian
1515	28653	4DB191	10.1130/B30235.1	1842.1	32.0	1828.6	43.6	1813.3	86.0	101.58826449015606	sandstone	sedimentary	510	15822	4187	Indian Meadows Fm	53.95	56.0	True	1842.1	Cenozoic
1516	28743	09ANJ34	10.1130/L131.1	79.6	1.2	75.8	10.8				sandstone	sedimentary	413	11096	2971	Valdez Gp	67.525	83.6	True	79.6
1517	28700	Kaibab2	10.1130/L121.1	995.0	88.0	999.0	70.0	1010.0	112.0	98.51485148514851	sandstone	sedimentary	491	15033	4000	Kaibab Limestone	262.5625	269.4875	True	995.0	Paleozoic*
1518	28854	50495	http://specialpapers.gsapubs.org/content/487/13.abstract	231.0	4.0						sandstone	sedimentary	491	15048	4002	Chinle Fm	201.3	232.0	True	231.0
1519	28865	MR2	http://specialpapers.gsapubs.org/content/487/63.abstract	162.0	7.6	153.2	13.1	9.1	189.5	1780.2197802197802	sandstone	sedimentary	332	9034	2282	Renova Fm	23.03	38.675	True	162.0
1520	35298	GV42	http://gsabulletin.gsapubs.org/content/114/12/1564.short	146.5	9.2						sandstone	sedimentary	260	6974	1767	Venado Fm	90.825	93.9	True	146.5
1521	29329	WM208	10.1130/B31142.1	978.5	10.4			1670.4	36.2	58.57878352490422	argillite	sedimentary	459	13634	3603	Wyman Fm	573.9	583.3	True	978.5
1522	28833	07-YHL-44	10.1130/B30530.1	1126.0	39.0	1143.0	39.0	1158.0	20.0	97.23661485319516	sandstone	sedimentary	1653	38100	9839	Saline River Fm	501.0	503.5	True	1158.0	Cambrian
1523	35247	1105NC4	10.1130/B30848.1	1245.0	37.0	1238.6	59.6	1227.5	150.6	101.42566191446029	sandstone	sedimentary	1659	38226	9894	Rapitan Gp	690.25	720.0	True	1245.0
1524	30847	08MC20	http://digitalscholarship.unlv.edu/thesesdissertations/145	974.2	43.6	970.2	40.0	961.0	85.8	101.3735691987513	sand	sedimentary	468	14065	3728	Muddy Creek Fm	5.333	11.62	True	974.2	Cenozoic
1525	28698	Esplanade	10.1130/L121.1	1445.0	42.0	1455.0	54.0	1470.0	118.0	98.29931972789116	sandstone	sedimentary	491	15037	4000	Supai Fm	282.0	313.75	True	1445.0	Paleozoic*
1526	35709	4RM11	10.1016/j.precamres.2014.06.005	1325.2	27.2	1326.8	26.4	1329.3	53.2	99.69156699014519	greywacke	sedimentary	464	13873	3691	Kingston Peak Fm	660.5	677.5	True	1325.2
1527	28513	UT4	10.1130/G30684.1	1869.8	57.2	1870.8	40.0	1871.9	56.0	99.88781452000642	conglomerate	sedimentary	502	15469	4106	Cedar Mountain Fm	122.0	125.0	True	1871.9	Mesozoic
1528	45603	K065711	https://doi.org/10.1130/B31532.1	979.0	44.0	1001.0	34.0	1051.0	57.2	93.14938154138915	sandstone	sedimentary	491	36854	9433	Carbon Canyon Member	748.0	753.6	True	979.0
1529	29322	12WI3	10.1130/B31142.1	1756.6	105.2	1773.2	57.8	1792.7	17.2	97.98627768170915	quartzite	metamorphic	459	13632	3603	Deep Spring Fm	541.0	559.8	True	1792.7	Cambrian
1530	28673	05DW1	10.1130/B30029.1	33.3	1.5	33.8	6.9	66.6	486.1	50.0	conglomerate	sedimentary	463	13841	3677	Sheep Pass Fm In Fish Creek Range	37.8	46.175	True	33.3
1531	43178	WellMid	10.2110/jsr.2013.59	348.9	10.1	357.8	16.4	415.9	101.6	83.89035825919692	siltstone	sedimentary	22	763	107	Wellington Fm	279.7375	282.0	True	348.9
1532	40670	LB4	10.1306/10191515029	1475.8	71.2	1485.3	44.8	1498.9	37.6	98.45886983788111	sandstone	sedimentary	1625	37218	9542	McMurray Fm	111.75	125.0	True	1498.9	Mesozoic
1533	40235	05LF13	10.1130/L533.1	2151.0	83.0	2246.0	42.0	2325.0	36.0	92.51612903225806	sandstone	sedimentary	152	5332	1258	Neruokpuk Quartzite	541.0	598.375	False	2325.0
1534	28861	CLA608	http://specialpapers.gsapubs.org/content/487/63.abstract	1680.0	12.9	1694.4	17.8	1712.0	36.4	98.13084112149532	sandstone	sedimentary	332	9034	2282	Renova Fm	23.03	38.675	True	1680.0	Cenozoic
1535	34439	RAR-00-06-zir	10.1130/B25564.1	106.6	2.4						sandstone	sedimentary	1498	34664	8674	Beaver Mines	109.875	122.0	True	106.6
1536	28688	3-26-04-23	10.1130/B30206.1	166.6	4.0	167.0	20.2	172.1	300.6	96.8041836141778	sandstone	sedimentary	35	2899	528	McCoy Mountains Fm	116.0	168.8	True	166.6
1537	28706	Tapeats1	10.1130/L121.1	1551.0	58.0	1599.0	40.0	1663.0	52.0	93.26518340348767	sandstone	sedimentary	491	15029	3997	Tapeats Sandstone	506.75	508.775	True	1663.0	Cambrian
1538	43167	BENYON-247	10.2110/jsr.2014.16	1789.2	33.6	1781.7	20.6	1772.9	21.4	100.9193975971572	sandstone	sedimentary	1625	37218	9542	McMurray Fm	111.75	125.0	True	1772.9	Mesozoic
1539	29210	51214	10.1130/B30999.1	1035.1	29.6	1031.7	64.9	1024.3	192.8	101.05437860001953	sandstone	sedimentary	509	15780	4175	Morrison Fm	145.0	158.85	True	1035.1	Mesozoic
1540	35327	TD1F105	10.1130/G33746.1	1394.9	54.8	1384.7	41.4	1368.8	63.8	101.90677966101696	sandstone	sedimentary	251	6864	1743	Lower Markley Sandstone Mbr	40.425	42.925	True	1394.9	Cenozoic
1541	35327	TD1F105	10.1130/G33746.1	1394.9	54.8	1384.7	41.4	1368.8	63.8	101.90677966101696	sandstone	sedimentary	251	6862	1743	Upper Markley Sandstone Mbr	37.8	38.675	True	1394.9	Cenozoic
1542	35250	08EAB10	10.1130/B30860.1	979.3	41.4	982.9	46.6	991.0	118.4	98.81937436932391	slate	metamorphic	477	14498	3843	Perry Canyon Fm	663.3331	668.0557	True	979.3
1543	35262	36EAB09-LA	10.1130/B30860.1	675.4	28.4	683.6	31.0	710.8	93.0	95.01969611705121	diamictite	sedimentary	477	14498	3843	Perry Canyon Fm	663.3331	668.0557	True	675.4
1544	28637	OS081084	10.1130/G31335.1	1832.4	76.2	1824.8	62.0	1816.3	100.6	100.88641744205252	metasedimentary	metamorphic	491	15025	3995	Vishnu Schist	1690.0	1887.5	True	1832.4
1545	28580	TS	10.1130/B30120.1	420.5	82.4	515.6	357.0	423.7	1367.3	99.24474864290772	sandstone	sedimentary	1657	38191	9877	Imperial Fm	362.225	382.7	True	420.5
1546	43650	VP09-08	10.1144/jgs2014-027	1106.0	17.0	1109.0	17.0	1079.0	27.0	102.50231696014829	sandstone	sedimentary	1562	35765	9021	Danish River Fm	427.4	438.5	True	1106.0	Paleozoic*
1547	43167	BENYON-247	10.2110/jsr.2014.16	1860.0	31.0	1859.1	20.4	1858.1	26.0	100.10225499165816	sandstone	sedimentary	1625	37218	9542	McMurray Fm	111.75	125.0	True	1858.1	Mesozoic
1548	33995	04SJP594	10.1130/L451.1	200.2	11.4	206.0	104.0	274.0	1280.0	73.06569343065694	conglomerate	sedimentary	1454	33651	8228	Laberge	169.8	199.8	True	200.2
1549	37462	Q	10.1130/GES01313.1	2242.3	137.4	2368.8	72.7	2479.5	52.2	90.43355515224843	sandstone	sedimentary	520	16412	4285	Queen City Fm	42.925	46.175	True	2479.5	Cenozoic
1550	28683	3-24-04-12	10.1130/B30206.1	229.3	4.8	241.2	37.8	357.9	395.2	64.06817546800782	sandstone	sedimentary	35	2899	528	McCoy Mountains Fm	116.0	168.8	True	229.3
1551	28576	T2	10.1130/B30120.1	1812.0	33.7	1811.7	63.2	1866.1	66.5	97.10090563206688	sandstone	sedimentary	1657	38191	9877	Imperial Fm	362.225	382.7	True	1812.0	Paleozoic*
1552	43129	99MHE1	http://geology.gsapubs.org/content/30/8/695.abstract	601.0	18.0						siltstone	sedimentary	494	15141	4020	Hermosa Fm	303.7	313.75	True	601.0	Paleozoic*
1553	37261	09LR01	10.1130/L557.1	2628.0	56.0			2703.0	18.0	97.2253052164262	quartzite	metamorphic	325	8781	2219	Kinnikinic Quartzite	456.5	470.0	True	2703.0	Paleozoic*
1554	40235	05LF13	10.1130/L533.1	2688.0	98.0	2677.0	46.0	2671.0	38.0	100.63646574316735	sandstone	sedimentary	152	5332	1258	Neruokpuk Quartzite	541.0	598.375	True	2671.0	Cambrian
1555	30846	08MC18	http://digitalscholarship.unlv.edu/thesesdissertations/145	20.7	1.0	23.5	16.2	324.4	1626.8	6.381011097410604	sandstone	sedimentary	468	14065	3728	Muddy Creek Fm	5.333	11.62	True	20.7
1556	40696	RB12-04	10.2475/06.2015.02	163.1	7.0	158.1	62.2	84.5	1013.2	193.01775147928993	sandstone	sedimentary	413	11097	2972	Orca Gp	53.95	64.9	True	163.1
1557	43176	12-LHCC07	10.2110/jsr.2014.33	2734.3	79.8	2743.1	34.9	2749.6	14.0	99.44355542624382	sandstone	sedimentary	491	15052	4003	Wahweap Sandstone	84.275	87.175	True	2749.6	Mesozoic
1558	37272	9TD10	10.1130/L557.1	984.0	12.0	1011.0	10.0	1071.0	16.0	91.87675070028011	quartzite	metamorphic	325	8781	2219	Kinnikinic Quartzite	456.5	470.0	False	984.0
1559	34481	4PL95	10.1130/B25896.1	102.0	8.0						sandstone	sedimentary	460	13673	3622	Glenns Ferry Gp	2.841	8.3395	True	102.0
1560	28695	B_Angel_3	10.1130/L121.1	1639.0	524.0	1641.0	302.0	1644.0	134.0	99.69586374695864	shale	sedimentary	491	15028	3997	Bright Angel Shale	498.925	506.75	True	1644.0	Cambrian
1561	35708	4CD13	10.1016/j.precamres.2014.06.005	1328.8	18.2	1339.4	50.4	1356.3	127.6	97.97242497972425	sandstone	sedimentary	464	13894	3692	Noonday Dolomite	569.2	578.6	True	1328.8
1562	43193	CP11	10.2110/jsr.2008.088	283.1	17.4	274.5	78.0	202.0	742.0	140.14851485148515	sandstone	sedimentary	491	15048	4002	Chinle Fm	201.3	232.0	True	283.1
1563	29053	EB0110	10.1130/B30824.1	1304.5	50.4	1308.8	32.2	1315.8	19.4	99.14120687034503	sandstone	sedimentary	515	16008	4229	Mesaverde Fm	80.725	90.825	True	1315.8	Mesozoic
1564	35264	38EAB09-SHR	10.1130/B30860.1	1724.0	38.0			1721.0	76.0	100.17431725740848	greywacke	sedimentary	477	14498	3843	Perry Canyon Fm	663.3331	668.0557	True	1724.0
1565	30878	TMS004	http://digitalscholarship.unlv.edu/thesesdissertations/1522/	21.3	1.2	19.9	28.2				sandstone	sedimentary	468	14065	3728	Muddy Creek Fm	5.333	11.62	True	21.3
1566	29017	09KED24	10.1130/B30818.1	143.0	6.0	147.0	12.0				sandstone	sedimentary	413	11096	2971	Valdez Gp	67.525	83.6	True	143.0
1567	29155	XOM-MDB-44	10.1130/G35513.1	180.1	10.2	175.3	31.6	111.6	443.2	161.3799283154122	sandstone	sedimentary	165	5752	1344	Wilcox Gp	41.3	56.0	True	180.1
1568	28882	10BM215	10.1130/B30657.1	1580.0	82.0	1592.0	60.0	1608.0	88.0	98.2587064676617	sandstone	sedimentary	52	1873	281	Bliss Fm	483.475	493.575	True	1580.0	Cambrian
1569	45594	K1252NAN1	https://doi.org/10.1130/B31532.1	1157.0	32.0	1161.0	46.0	1168.0	59.8	99.0582191780822	sandstone	sedimentary	491	36857	9434	Nankoweap Fm	767.6	770.4	True	1157.0
1570	28735	7015	10.1130/B30260.1	192.2	7.0			201.5	84.8	95.38461538461539	sandstone	sedimentary	290	7498	1979	Lonesome Fm	163.5	164.15	True	192.2
1571	43172	12-LHCC04	10.2110/jsr.2014.33	99.7	5.0	103.7	32.6	195.5	764.0	50.99744245524297	sandstone	sedimentary	491	15053	4003	Straight Cliffs Sandstone	87.175	95.55	True	99.7
1572	34177	05KP40	http://www.carleton.edu/departments/geol/Resources/comps/CompsPDFfiles/2006CompsPapers/Lundquist2006.pdf	1786.8	12.1	1734.2	20.5	1848.8	8.3	96.64647338814366	slate	metamorphic	192	6169	1477	Tyler Fm	1825.0	1881.25	False	1848.8
1573	40657	CW2	10.1306/10191515029	1853.2	69.4	1839.4	54.2	1823.7	85.6	101.61759061249109	sandstone	sedimentary	1625	37218	9542	McMurray Fm	111.75	125.0	True	1853.2	Mesozoic
1574	43613	10091	10.1130/B30843.1	1416.0	32.0			1405.0	56.0	100.78291814946618	sandstone	sedimentary	1572	35879	9073	Lorimer Ridge Fm	444.0333	444.2667	True	1416.0	Paleozoic*
1575	35252	13EAB10	10.1130/B30860.1	2607.7	70.8	2590.1	31.0	2576.3	5.6	101.21880215813376	diamictite	sedimentary	477	14498	3843	Perry Canyon Fm	663.3331	668.0557	True	2576.3
1576	28876	08FM10-LA	10.1130/B30657.1	498.0	12.0	496.0	30.0	491.0	156.0	101.42566191446029	sandstone	sedimentary	52	1873	281	Bliss Fm	483.475	493.575	True	498.0
1577	29057	EBO410	10.1130/B30824.1	1614.2	53.6	1649.2	32.0	1694.1	21.2	95.28363142671625	sandstone	sedimentary	515	15986	4229	Lance Fm	66.0	72.1	True	1694.1	Mesozoic
1578	31613	20917	http://www.nature.com/ngeo/journal/v1/n8/abs/ngeo259.html	405.4	38.4						sand	sedimentary	277	7258	1897	Columbia River Basalt	14.3575	15.3788	True	405.4
1579	34003	GL04-108B	10.1130/L451.1	188.2	8.4	218.0	46.0	553.0	508.0	34.03254972875226	conglomerate	sedimentary	1454	33651	8228	Laberge	169.8	199.8	True	188.2
1580	35701	11RMAH1	10.1016/j.precamres.2014.06.005	1268.7	191.4	1250.6	121.2	1219.6	52.8	104.02591013447032	siltstone	sedimentary	464	13873	3691	Kingston Peak Fm	660.5	677.5	True	1219.6
1581	42912	IB-D1	http://ir.uiowa.edu/etd/3119	1359.0	38.4	1360.0	29.8	1361.0	46.8	99.85304922850845	sandstone	sedimentary	432	13132	3464	Bernadotte Sandstone Mbr	312.9333	313.8813	True	1359.0	Paleozoic*
1582	28683	3-24-04-12	10.1130/B30206.1	1082.7	37.4	1093.8	29.0	1115.8	42.8	97.03351855171178	sandstone	sedimentary	35	2899	528	McCoy Mountains Fm	116.0	168.8	True	1082.7	Mesozoic
1583	30849	08MC29	http://digitalscholarship.unlv.edu/thesesdissertations/145	1059.2	22.8	1059.8	36.6	1060.9	102.0	99.83975869544726	sandstone	sedimentary	468	14065	3728	Muddy Creek Fm	5.333	11.62	True	1059.2	Cenozoic
1584	29188	XOM-MDB-78	10.1130/G35513.1	1685.0	38.2	1687.6	28.6	1690.9	42.6	99.6510733928677	sandstone	sedimentary	518	16247	4268	Frio Fm	24.2975	28.1	True	1685.0	Cenozoic
1585	28640	OS0881	10.1130/G31335.1	1767.7	60.6	1803.6	59.4	1845.3	106.0	95.7947217254647	metasedimentary	metamorphic	491	15025	3995	Vishnu Schist	1690.0	1887.5	True	1767.7
1586	28870	04SASC	10.1130/B30657.1	1349.0	24.0	1386.0	22.0	1444.0	44.0	93.42105263157895	sandstone	sedimentary	55	2029	313	Bliss Fm	483.475	493.575	False	1349.0
1587	29040	BH0110	10.1130/B30824.1	99.0	11.2	100.5	27.6	135.0	624.8	73.33333333333333	sandstone	sedimentary	515	15990	4229	Frontier Fm	95.022	100.5	True	99.0
1588	40690	11CD-60	10.2475/06.2015.02	472.4	19.0	464.9	23.2	428.0	102.6	110.37383177570094	sandstone	sedimentary	414	11107	2980	Ghost Rocks Fm	62.7	66.0	True	472.4
1589	28865	MR2	http://specialpapers.gsapubs.org/content/487/63.abstract	33.0	3.1	53.4	22.6	1102.7	889.0	2.992654393760769	sandstone	sedimentary	332	9034	2282	Renova Fm	23.03	38.675	True	33.0
1590	35309	KDS03	http://gsabulletin.gsapubs.org/content/114/12/1564.short	162.2	7.0						sandstone	sedimentary	260	6970	1767	Guinda Fm	84.05	84.5	True	162.2
1591	42905	FCB-A2	http://ir.uiowa.edu/etd/3119	1464.0	35.0	1458.0	28.6	1448.0	48.4	101.10497237569061	sandstone	sedimentary	90	3423	691	Cherokee Gp	311.0	319.0	True	1464.0	Paleozoic*
1592	28971	Basal-Kootenay	10.1130/B30671.1	1205.9	87.0	1232.4	81.8	1278.9	161.6	94.29196966142779	sandstone	sedimentary	1641	37796	9718	Elk Fm	134.625	141.1	True	1205.9	Mesozoic
1593	28971	Basal-Kootenay	10.1130/B30671.1	1205.9	87.0	1232.4	81.8	1278.9	161.6	94.29196966142779	sandstone	sedimentary	1641	37795	9718	Mist Mountain Fm	141.1	146.1834	True	1205.9	Mesozoic
1594	28971	Basal-Kootenay	10.1130/B30671.1	1205.9	87.0	1232.4	81.8	1278.9	161.6	94.29196966142779	sandstone	sedimentary	1641	37794	9718	Morrissey Fm	146.1834	147.3666	True	1205.9	Mesozoic
1595	28509	UT0714	10.1130/G30684.1	1166.7	43.4	1170.1	31.4	1176.5	39.6	99.1670208244794	conglomerate	sedimentary	502	15469	4106	Cedar Mountain Fm	122.0	125.0	True	1176.5	Mesozoic
1596	37461	K	10.1130/GES01313.1	1181.2	69.9	1135.0	109.2	1048.4	127.7	112.6669210225105	sandstone	sedimentary	520	16418	4285	Simsboro Sand Mbr	56.0	56.8	True	1181.2	Cenozoic
1597	28699	Hermit	10.1130/L121.1	1754.0	28.0	1768.0	18.0	1785.0	20.0	98.26330532212886	sandstone	sedimentary	491	15036	4000	Hermit Shale	279.7375	282.0	True	1785.0	Paleozoic*
1598	40670	LB4	10.1306/10191515029	1043.1	43.6	1037.2	112.2	1024.8	337.2	101.78571428571429	sandstone	sedimentary	1625	37218	9542	McMurray Fm	111.75	125.0	True	1043.1	Mesozoic
1599	40037	PQ	10.1306/072600710305					988.0	36.0		sandstone	sedimentary	314	8592	2142	Wappinger Gp	470.0	541.0	True	988.0	Cambrian
1600	28731	6137	10.1130/B30260.1	188.1	8.6			826.9	70.4	22.74761156125287	sandstone	sedimentary	290	7511	1980	Keller Creek Shale	192.925	201.3	True	188.1
1601	40918	ME-K	10.2475/01.2007.05	1627.3	61.8			1567.0	94.0	103.84811742182514	quartzite	metamorphic	385	10563	2747	Kittery Fm	448.05	450.0	True	1627.3	Paleozoic*
1602	29113	XOM-AOS-22	10.1130/G35513.1	164.7	6.0	163.3	8.2	142.1	95.0	115.90429275158338	sandstone	sedimentary	1625	37218	9542	McMurray Fm	111.75	125.0	True	164.7
1603	28675	05SM2	10.1130/B30029.1	34.7	0.7	23.1	3.4				sandstone	sedimentary	465	13948	3704	Sheep Pass Fm	34.875	46.175	False	34.7
1604	28707	Tapeats2	10.1130/L121.1	1414.0	44.0	1433.0	40.0	1461.0	70.0	96.78302532511978	sandstone	sedimentary	491	15029	3997	Tapeats Sandstone	506.75	508.775	True	1414.0	Cambrian
1605	33950	12MP57	10.1130/L475.1	585.4	11.9	586.3	11.2	589.9	29.3	99.23715884048144	conglomerate	sedimentary	425	11187	3018	Descon Fm	407.6	470.0	True	585.4	Paleozoic*
1606	42838	TF2002	10.1139/E09-065	2629.5	136.0	2675.2	211.4	2847.5	121.7	92.3441615452151	sandstone	sedimentary	1489	34401	8593	Toad	240.75	250.525	True	2847.5	Mesozoic
1607	29115	XOM-AOS-25	10.1130/G35513.1	1075.5	22.4	1080.7	25.4	1091.2	61.6	98.56121700879766	sandstone	sedimentary	1625	37218	9542	McMurray Fm	111.75	125.0	True	1075.5	Mesozoic
1608	46214	WY3	10.1016/j.gsf.2016.11.010	2346.2	59.4			2800.9	46.7	83.76593237887822	quartzite	metamorphic	503	15513	4124	Medicine Bow Fm	67.525	72.1	True	2800.9	Mesozoic
1609	29053	EB0110	10.1130/B30824.1	2430.8	71.0	2468.4	42.2	2499.4	48.8	97.25534128190766	sandstone	sedimentary	515	16008	4229	Mesaverde Fm	80.725	90.825	True	2499.4	Mesozoic
1610	28675	05SM2	10.1130/B30029.1	1614.5	14.3	1627.3	11.5	1643.9	18.6	98.21157004683984	sandstone	sedimentary	465	13948	3704	Sheep Pass Fm	34.875	46.175	True	1614.5	Cenozoic
1611	28866	PG208	http://specialpapers.gsapubs.org/content/487/63.abstract	73.1	0.8	81.0	12.7	319.5	373.0	22.879499217527385	sandstone	sedimentary	332	9034	2282	Renova Fm	23.03	38.675	True	73.1
1612	28631	K05110	10.1130/G31335.1	2029.7	82.6	2030.8	47.6	2031.9	46.4	99.89172695506669	metasedimentary	metamorphic	491	15025	3995	Vishnu Schist	1690.0	1887.5	True	2031.9
1613	34276	LM2-1262	http://gsabulletin.gsapubs.org/content/113/9/1234.short	1159.0	28.0			1145.0	36.0	101.22270742358079	sandstone	sedimentary	618	18832	4926	Summerside	509.35	516.1	True	1159.0	Cambrian
1614	29942	CG11-8	10.1130/GES00917.1	1775.0	24.0	1771.0	23.0	1777.7	48.5	99.84811835517804	sandstone	sedimentary	526	16840	4323	Lower Fleming Mbr	14.3575	28.1	True	1775.0	Cenozoic
1615	29942	CG11-8	10.1130/GES00917.1	1775.0	24.0	1771.0	23.0	1777.7	48.5	99.84811835517804	sandstone	sedimentary	526	16839	4323	Middle Fleming Mbr	11.62	14.3575	True	1775.0	Cenozoic
1616	29942	CG11-8	10.1130/GES00917.1	1775.0	24.0	1771.0	23.0	1777.7	48.5	99.84811835517804	sandstone	sedimentary	526	16838	4323	Upper Fleming Mbr	3.6	11.62	True	1775.0	Cenozoic
1617	37758	7-30a	https://uh-ir.tdl.org/uh-ir/handle/10657/964	128.1	3.7	153.4	8.2	565.0	86.7	22.672566371681416	sandstone	sedimentary	1633	37499	9607	Dunvegan Fm	95.0	96.1	False	128.1
1618	40672	LL3	10.1306/10191515029	440.3	10.2	441.5	34.6	447.4	207.6	98.41305319624497	sandstone	sedimentary	1625	37218	9542	McMurray Fm	111.75	125.0	True	440.3
1619	28833	07-YHL-44	10.1130/B30530.1	1471.0	47.0	1490.0	48.0	1481.0	20.0	99.32478055367994	sandstone	sedimentary	1653	38100	9839	Saline River Fm	501.0	503.5	True	1481.0	Cambrian
1620	43652	C-054480	10.1144/jgs2014-027	1114.0	30.0	1116.0	28.0	1121.0	38.0	99.37555753791258	sandstone	sedimentary	1566	35810	9042	Lands Lokk Fm	426.3	433.4	True	1114.0	Paleozoic*
1621	33948	12MP55	10.1130/L475.1	458.7	5.0	446.8	15.2	385.9	90.9	118.86499093029282	sandstone	sedimentary	425	11184	3018	Karheen Fm	387.7	412.9	True	458.7
1622	40237	28LF13	10.1130/L533.1	2800.0	120.0	2657.0	66.0	2593.0	78.0	107.98303123794832	sandstone	sedimentary	152	5332	1258	Neruokpuk Quartzite	541.0	598.375	False	2593.0
1623	43204	CP50	10.2110/jsr.2008.088	1949.7	59.6	1953.5	35.3	1957.5	35.9	99.6015325670498	sandstone	sedimentary	494	15143	4021	Dolores Fm	222.375	229.5	True	1957.5	Mesozoic
1624	29212	51219	10.1130/B30999.1	271.0	11.5	261.8	74.2	180.7	745.9	149.97232982844494	sandstone	sedimentary	504	15543	4128	Ericson Sandstone	81.6833	89.8	True	271.0
1625	43617	10093	10.1130/B30843.1	451.0	12.0			428.0	86.0	105.37383177570094	sandstone	sedimentary	1571	35874	9069	Cranstone Fm	438.5	443.8	True	451.0
1626	29095	CS12-4	10.1130/B30884.1	1069.0	34.0	1116.0	31.0	1208.0	30.0	88.49337748344371	sandstone	sedimentary	57	2076	10063	Hazel Fm	1029.5	1034.0	False	1208.0
1627	28681	07NW2	10.1130/B30029.1	1094.7	15.8	1100.2	20.2	1111.0	51.4	98.53285328532853	siltstone	sedimentary	463	13837	3673	Newark Canyon Fm	113.0	122.0	True	1094.7	Mesozoic
1628	29050	DB0110	10.1130/B30824.1	97.2	13.0	92.0	67.6				sandstone	sedimentary	515	15990	4229	Frontier Fm	95.022	100.5	True	97.2
1629	40789	NHZ	10.2475/10.2012.01	1005.4	20.4			1023.0	74.0	98.27956989247312	quartzite	metamorphic	384	10532	2734	Massabesic Gneiss	443.8	477.7	True	1005.4	Paleozoic*
1630	28731	6137	10.1130/B30260.1	191.8	7.4			222.1	86.0	86.35749662314272	sandstone	sedimentary	290	7511	1980	Keller Creek Shale	192.925	201.3	True	191.8
1631	37462	Q	10.1130/GES01313.1	1145.2	72.5	1159.9	60.8	1187.5	51.9	96.43789473684211	sandstone	sedimentary	520	16412	4285	Queen City Fm	42.925	46.175	True	1187.5	Cenozoic
1632	34160	Parry7	10.1139/e2012-067	1027.8	25.0	996.4	18.2	1095.2	30.3	93.84587289992696	sandstone	sedimentary	1517	34961	8808	Parry Islands Fm	368.875	374.5625	False	1027.8
1633	29197	51106	10.1130/B30999.1	1060.9	28.1	1054.3	21.4	1040.7	31.1	101.94100124915921	sandstone	sedimentary	485	14882	3957	Dakota Fm	102.625	106.8125	True	1060.9	Mesozoic
1634	31613	20917	http://www.nature.com/ngeo/journal/v1/n8/abs/ngeo259.html					1732.3	3.6		sand	sedimentary	277	7258	1897	Columbia River Basalt	14.3575	15.3788	True	1732.3	Cenozoic
1635	29155	XOM-MDB-44	10.1130/G35513.1	216.2	8.8	208.9	25.8	128.3	307.6	168.51130163678877	sandstone	sedimentary	165	5752	1344	Wilcox Gp	41.3	56.0	True	216.2
1636	28698	Esplanade	10.1130/L121.1	1409.0	68.0	1423.0	46.0	1445.0	52.0	97.50865051903114	sandstone	sedimentary	491	15037	4000	Supai Fm	282.0	313.75	True	1445.0	Paleozoic*
1637	30331	SG-40	10.1130/B31065.1	155.2	10.6	75.0	120.0				sandstone	sedimentary	570	18076	4646	San Emigdio Shale and Tejon Fm	36.825	47.8	True	155.2
1638	30335	SG-21	10.1130/B31065.1	167.5	10.8	169.1	19.4	190.6	248.6	87.8803777544596	sandstone	sedimentary	561	17795	4624	Lodo Fm	58.6667	59.2	True	167.5
1639	28833	07-YHL-44	10.1130/B30530.1	2634.0	84.0	2696.0	86.0	2734.0	17.0	96.34235552304315	sandstone	sedimentary	1653	38100	9839	Saline River Fm	501.0	503.5	True	2734.0	Cambrian
1640	40366	StQ2	10.1139/E06-010					2722.0	14.0		quartzite	metamorphic	196	6242	1498	Fern Creek Fm	2113.0	2140.0	True	2722.0
1641	40366	StQ2	10.1139/E06-010					2722.0	14.0		quartzite	metamorphic	196	6241	1498	Sturgeon Quartzite	2059.0	2113.0	True	2722.0
1642	40366	StQ2	10.1139/E06-010					2722.0	14.0		quartzite	metamorphic	196	6240	1498	Randville Dolomite	2032.0	2059.0	True	2722.0
1643	40231	12JT10	10.1130/L533.1	1676.0	81.0	1814.0	72.0	2050.0	130.0	81.7560975609756	sandstone	sedimentary	152	5332	1258	Neruokpuk Quartzite	541.0	598.375	False	1676.0
1644	29060	FU0108	10.1130/B30824.1	1488.2	59.2	1591.3	42.0	1730.7	50.0	85.98832842202577	sandstone	sedimentary	515	16018	4233	Flathead Sandstone	503.5	511.0	False	1730.7
1645	28684	3-24-04-3	10.1130/B30206.1	1588.8	39.4	1623.8	63.6	1669.6	135.8	95.16051748921898	sandstone	sedimentary	35	2899	528	McCoy Mountains Fm	116.0	168.8	True	1588.8	Mesozoic
1646	40660	KE2	10.1306/10191515029	416.6	14.2	406.5	26.2	349.4	158.0	119.23297080709789	sandstone	sedimentary	1625	37218	9542	McMurray Fm	111.75	125.0	True	416.6
1647	28728	6004	10.1130/B30260.1	2645.9	77.6			2650.2	80.2	99.83774809448343	sandstone	sedimentary	290	7516	1980	Vester Fm	227.0	237.0	True	2645.9	Mesozoic
1648	29072	SRC0110	10.1130/B30824.1	2511.1	318.4	2652.3	145.8	2761.9	37.0	90.91929468843912	sandstone	sedimentary	515	15990	4229	Frontier Fm	95.022	100.5	True	2761.9	Mesozoic
1649	34492	6950	10.1130/B25989.1	2634.0	192.0			2710.0	82.0	97.19557195571956	sandstone	sedimentary	757	22001	6028	Dunvegan	1326.25	1351.0	True	2710.0
1650	43651	C-054337	10.1144/jgs2014-027	1682.0	48.0	1691.0	49.0	1718.0	49.0	97.90454016298021	sandstone	sedimentary	1562	35765	9021	Danish River Fm	427.4	438.5	True	1682.0	Paleozoic*
1651	33948	12MP55	10.1130/L475.1	446.0	8.2	443.0	13.3	427.6	71.0	104.30308699719365	sandstone	sedimentary	425	11184	3018	Karheen Fm	387.7	412.9	True	446.0
1652	29940	CG11-6	10.1130/GES00917.1	1813.0	21.0	1809.0	13.0	1796.9	37.3	100.89598753408649	sandstone	sedimentary	523	16616	4300	Cockfield Fm	37.8	38.675	True	1813.0	Cenozoic
1653	35249	HHP7272	10.1130/B30848.1	1798.2	68.8	1882.7	64.0	1977.3	108.0	90.94219390077379	sandstone	sedimentary	1657	38184	9876	Slats Creek Fm	503.5	511.0	True	1798.2	Cambrian
1654	40689	11SJO-42	10.2475/06.2015.02	441.0	6.0	441.0	11.0	441.2	60.8	99.9546690843155	sandstone	sedimentary	414	11107	2980	Ghost Rocks Fm	62.7	66.0	True	441.0
1655	40670	LB4	10.1306/10191515029	474.0	26.2	462.3	103.0	404.5	610.2	117.18170580964153	sandstone	sedimentary	1625	37218	9542	McMurray Fm	111.75	125.0	True	474.0
1656	40232	12JT11	10.1130/L533.1	1449.0	67.0	1616.0	58.0	1844.0	79.0	78.57917570498915	sandstone	sedimentary	152	5332	1258	Neruokpuk Quartzite	541.0	598.375	False	1449.0
1657	28653	4DB191	10.1130/B30235.1	1486.6	26.6	1657.9	47.6	1882.4	98.0	78.97365065873353	sandstone	sedimentary	510	15822	4187	Indian Meadows Fm	53.95	56.0	False	1486.6
1658	42911	IB-M1	http://ir.uiowa.edu/etd/3119	2704.0	58.6	2711.0	29.0	2717.0	25.6	99.52153110047847	sandstone	sedimentary	83	3118	629	Caseyville Fm	319.0	320.05	True	2717.0	Paleozoic*
1659	34005	TB3	10.1130/L451.1	194.5	11.6	173.0	50.0				conglomerate	sedimentary	1454	33654	8226	Tantalus	126.1	150.325	True	194.5
1660	40048	Sewanee	10.1086/379690	462.9	9.4						sandstone	sedimentary	12	209	61	Sewanee Conglomerate	322.507	322.584	True	462.9
1661	30881	TMS009	http://digitalscholarship.unlv.edu/thesesdissertations/1522/	1020.3	31.6	1010.0	57.6	987.6	170.2	103.31105710814094	sandstone	sedimentary	468	14065	3728	Muddy Creek Fm	5.333	11.62	True	1020.3	Cenozoic
1662	29105	XOM-AOS-06	10.1130/G35513.1	174.7	5.4	165.8	59.4	39.9	933.8	437.84461152882204	sandstone	sedimentary	1625	37219	9542	Clearwater Fm	110.5	111.75	True	174.7
1663	29026	10ANJ58	10.1130/B30818.1	75.0	8.0	76.0	18.0				sandstone	sedimentary	413	11096	2971	Valdez Gp	67.525	83.6	True	75.0
1664	28708	Tem_Butte1	10.1130/L121.1	1366.0	48.0	1367.0	48.0	1370.0	98.0	99.7080291970803	conglomerate	sedimentary	491	15031	3998	Temple Butte Limestone	358.9	379.925	True	1366.0	Paleozoic*
1665	30300	CLS506-1	10.1130/B31065.1	115.9	4.4	109.2	14.2				sandstone	sedimentary	215	6523	1589	Point Loma Fm	70.575	80.725	True	115.9
1666	29051	DK0108	10.1130/B30824.1	1405.5	13.8	1402.9	90.2	1398.9	226.4	100.47179927085567	sandstone	sedimentary	515	15992	4229	Cloverly Fm	130.275	145.0	True	1405.5	Mesozoic
1667	28877	08FM8b	10.1130/B30657.1	480.0	24.0	475.0	30.0	448.0	126.0	107.14285714285714	arkose	sedimentary	52	1873	281	Bliss Fm	483.475	493.575	True	480.0
1668	29120	XOM-MDB-05	10.1130/G35513.1	1056.7	21.2	1063.3	25.2	1076.9	63.0	98.12424551954685	sandstone	sedimentary	526	16848	4323	Lower Frio Mbr	26.8325	27.4663	True	1056.7	Cenozoic
1669	29120	XOM-MDB-05	10.1130/G35513.1	1056.7	21.2	1063.3	25.2	1076.9	63.0	98.12424551954685	sandstone	sedimentary	526	16847	4323	Middle Frio Mbr	24.9313	26.8325	True	1056.7	Cenozoic
1670	29120	XOM-MDB-05	10.1130/G35513.1	1056.7	21.2	1063.3	25.2	1076.9	63.0	98.12424551954685	sandstone	sedimentary	526	16846	4323	Upper Frio Mbr	24.2975	24.9313	True	1056.7	Cenozoic
1671	35250	08EAB10	10.1130/B30860.1	1020.4	35.0	1027.3	27.4	1042.1	41.0	97.91766625083964	slate	metamorphic	477	14498	3843	Perry Canyon Fm	663.3331	668.0557	True	1020.4
1672	29198	51107	10.1130/B30999.1	109.9	8.9	117.4	25.1	271.1	484.8	40.538546661748434	sandstone	sedimentary	501	15438	4096	Cedar Mountain Fm and Burro Canyon Fm	122.0	125.0	True	109.9
1673	40672	LL3	10.1306/10191515029	351.1	14.8	351.6	16.0	354.8	71.8	98.95715896279594	sandstone	sedimentary	1625	37218	9542	McMurray Fm	111.75	125.0	True	351.1
1674	34754	AE1	10.1029/2005TC001830	1938.0	80.0	1942.0	46.0	1945.0	23.0	99.6401028277635	sandstone	sedimentary	1545	35561	8952	Bjorne Fm	247.2	251.6755	True	1945.0	Mesozoic
1675	28881	09SL2	10.1130/B30657.1	1923.0	16.0	1917.0	40.0	1911.0	80.0	100.62794348508633	sandstone	sedimentary	52	1873	281	Bliss Fm	483.475	493.575	True	1923.0	Cambrian
1676	29152	XOM-MDB-40	10.1130/G35513.1	1198.4	70.2	1188.1	89.6	1169.3	219.0	102.48866843410588	sandstone	sedimentary	434	11662	3146	Wilcox Fm	41.3	47.8	True	1198.4	Cenozoic
1677	29214	Sam-17	10.1130/B30999.1	1448.3	41.2	1470.5	28.8	1502.7	36.0	96.37984960404604	sandstone	sedimentary	501	15433	4094	Mesaverde Gp	66.0	74.975	True	1502.7	Mesozoic
1678	28976	Prospect-Creek	10.1130/B30671.1	1413.6	128.0	1407.4	118.2	1398.0	225.8	101.11587982832619	sandstone	sedimentary	1632	37455	9596	Nikanassin Fm	143.7	153.4	True	1413.6	Mesozoic
1679	28721	KNK	10.1130/G31762.1	2692.0	30.1	2722.9	16.0	2746.0	16.4	98.03350327749453	conglomerate	sedimentary	1641	37797	9719	Cadomin Fm	122.0	126.1	True	2746.0	Mesozoic
1680	35309	KDS03	http://gsabulletin.gsapubs.org/content/114/12/1564.short					1696.0	14.5		sandstone	sedimentary	260	6970	1767	Guinda Fm	84.05	84.5	True	1696.0	Mesozoic
1681	30879	TMS005	http://digitalscholarship.unlv.edu/thesesdissertations/1522/	1205.9	23.6	1202.1	17.8	1195.4	26.0	100.87836707378283	sandstone	sedimentary	468	14065	3728	Muddy Creek Fm	5.333	11.62	True	1205.9	Cenozoic
1682	30875	TMS001	http://digitalscholarship.unlv.edu/thesesdissertations/1522/	1017.8	18.2	1016.2	18.4	1012.6	43.4	100.51352952794787	sandstone	sedimentary	468	14065	3728	Muddy Creek Fm	5.333	11.62	True	1017.8	Cenozoic
1683	28654	4DB4	10.1130/B30235.1	1114.3	54.0	1104.5	50.0	1085.2	104.0	102.68153335790637	sandstone	sedimentary	510	15822	4187	Indian Meadows Fm	53.95	56.0	True	1114.3	Cenozoic
1684	30823	22CS07	http://www.mbmg.mtech.edu/pdf-open-files/mbmg569/mbmg569.pdf	48.0	2.0						sandstone	sedimentary	332	9034	2282	Renova Fm	23.03	38.675	True	48.0
1685	28881	09SL2	10.1130/B30657.1	1812.0	44.0	1808.0	32.0	1803.0	46.0	100.49916805324459	sandstone	sedimentary	52	1873	281	Bliss Fm	483.475	493.575	True	1812.0	Cambrian
1686	42913	IB-D2	http://ir.uiowa.edu/etd/3119	1088.0	26.6	1087.0	35.8	1085.0	93.2	100.27649769585253	sandstone	sedimentary	432	13132	3464	Bernadotte Sandstone Mbr	312.9333	313.8813	True	1088.0	Paleozoic*
1687	29057	EBO410	10.1130/B30824.1	1746.3	169.4	1776.8	93.4	1812.7	17.0	96.33695592210515	sandstone	sedimentary	515	15986	4229	Lance Fm	66.0	72.1	True	1812.7	Mesozoic
1688	34002	C1	10.1130/L451.1	183.2	3.6	187.0	34.0	240.0	446.0	76.33333333333333	conglomerate	sedimentary	1454	33654	8226	Tantalus	126.1	150.325	True	183.2
1689	28867	PIO509	http://specialpapers.gsapubs.org/content/487/63.abstract	114.0	2.6	127.0	12.6	377.3	231.4	30.214683275907767	sandstone	sedimentary	332	9034	2282	Renova Fm	23.03	38.675	False	114.0
1690	45593	L-Nankoweap	https://doi.org/10.1130/B31532.1	1275.0	40.0	1286.0	46.0	1306.0	59.8	97.62633996937213	sandstone	sedimentary	491	36857	9434	Nankoweap Fm	767.6	770.4	True	1275.0
1691	40690	11CD-60	10.2475/06.2015.02	64.2	3.4	63.5	10.2	39.5	373.6	162.53164556962025	sandstone	sedimentary	414	11107	2980	Ghost Rocks Fm	62.7	66.0	True	64.2
1692	43195	CP18	10.2110/jsr.2008.088	281.4	10.8	243.6	63.0				sandstone	sedimentary	490	15003	3990	Chinle Fm	201.3	232.0	True	281.4
1693	31613	20917	http://www.nature.com/ngeo/journal/v1/n8/abs/ngeo259.html	132.9	2.4						sand	sedimentary	277	7258	1897	Columbia River Basalt	14.3575	15.3788	True	132.9
1694	29162	XOM-MDB-52	10.1130/G35513.1	1033.7	24.4	1036.8	37.8	1043.5	105.2	99.06085289889793	sandstone	sedimentary	521	16461	4289	Dexter Sand	95.319	96.9756	True	1033.7	Mesozoic
1695	29120	XOM-MDB-05	10.1130/G35513.1	1283.1	32.0	1296.5	22.6	1318.8	27.2	97.29299363057325	sandstone	sedimentary	526	16848	4323	Lower Frio Mbr	26.8325	27.4663	True	1318.8	Cenozoic
1696	29120	XOM-MDB-05	10.1130/G35513.1	1283.1	32.0	1296.5	22.6	1318.8	27.2	97.29299363057325	sandstone	sedimentary	526	16847	4323	Middle Frio Mbr	24.9313	26.8325	True	1318.8	Cenozoic
1697	29120	XOM-MDB-05	10.1130/G35513.1	1283.1	32.0	1296.5	22.6	1318.8	27.2	97.29299363057325	sandstone	sedimentary	526	16846	4323	Upper Frio Mbr	24.2975	24.9313	True	1318.8	Cenozoic
1698	28973	Carbon-Creek-Rd	10.1130/B30671.1	628.9	49.6	631.8	40.0	642.2	43.0	97.92899408284023	sandstone	sedimentary	1622	37081	9506	Monach Fm	134.05	135.2	True	642.2	Mesozoic
1699	34883	09-CR3	10.1130/GES00982.1	1346.5	24.4	1350.7	46.0	1357.5	112.2	99.18968692449356	sand	sedimentary	491	36857	9434	Nankoweap Fm	767.6	770.4	True	1346.5
1700	34883	09-CR3	10.1130/GES00982.1	1346.5	24.4	1350.7	46.0	1357.5	112.2	99.18968692449356	sand	sedimentary	491	15026	9432	Sixtymile Fm	508.955	541.0	True	1346.5	Cambrian
1701	29173	XOM-MDB-63	10.1130/G35513.1	164.5	11.4	163.9	32.8	155.4	481.6	105.85585585585586	sandstone	sedimentary	519	16306	4277	Frio Fm	22.3825	31.0	True	164.5
1702	34492	6950	10.1130/B25989.1	2622.0	98.0			2583.0	34.0	101.50987224157956	sandstone	sedimentary	757	22001	6028	Dunvegan	1326.25	1351.0	True	2583.0
1703	29172	XOM-MDB-62	10.1130/G35513.1	34.4	2.6	35.3	20.4	97.9	1403.8	35.13789581205312	sandstone	sedimentary	518	16247	4268	Frio Fm	24.2975	28.1	True	34.4
1704	33996	04SJP60313	10.1130/L451.1	199.3	5.2	184.0	20.0				sandstone	sedimentary	1454	33651	8228	Laberge	169.8	199.8	True	199.3
1705	40235	05LF13	10.1130/L533.1	1916.0	74.0	1915.0	41.0	1906.0	40.0	100.52465897166842	sandstone	sedimentary	152	5332	1258	Neruokpuk Quartzite	541.0	598.375	True	1906.0	Cambrian
1706	37468	OK-1	10.1130/GES01316.1	2729.6	51.4	2716.5	22.2	2706.7	6.6	100.8460486939816	sandstone	sedimentary	158	5568	1306	Pontotoc Gp	282.0	300.1	True	2706.7	Paleozoic*
1707	34913	39-FC126	10.1130/GES00982.1	1651.8	86.2	1664.9	48.8	1681.4	13.4	98.23956226953729	sandstone	sedimentary	222	6547	1598	Imperial Fm	3.347	4.0333	True	1681.4	Cenozoic
1708	43165	BENYON-250	10.2110/jsr.2014.16	619.4	35.6	631.3	38.0	674.2	115.6	91.87184811628597	sandstone	sedimentary	1625	37218	9542	McMurray Fm	111.75	125.0	True	619.4	Mesozoic
1709	42888	C-100629	10.1139/E10-006	1366.0	30.0	1366.0	20.0	1367.0	22.0	99.92684711046087	sandstone	sedimentary	1535	35351	8902	Isachsen Fm	113.0	126.1	True	1367.0	Mesozoic
1710	29128	XOM-MDB-13	10.1130/G35513.1	1105.0	20.0	1133.3	14.2	1187.9	13.8	93.02129808906474	sandstone	sedimentary	527	16912	4331	Nanafalia Fm	56.8	58.1333	False	1187.9
1711	29128	XOM-MDB-13	10.1130/G35513.1	1105.0	20.0	1133.3	14.2	1187.9	13.8	93.02129808906474	sandstone	sedimentary	527	16911	4331	Tuscahoma Fm	54.975	56.8	False	1187.9
1712	29128	XOM-MDB-13	10.1130/G35513.1	1105.0	20.0	1133.3	14.2	1187.9	13.8	93.02129808906474	sandstone	sedimentary	527	16910	4331	Bashi Fm	53.95	54.975	False	1187.9
1713	29128	XOM-MDB-13	10.1130/G35513.1	1105.0	20.0	1133.3	14.2	1187.9	13.8	93.02129808906474	sandstone	sedimentary	527	16909	4331	Hatchetigbee Fm	52.925	53.95	False	1187.9
1714	29321	12WI2	10.1130/B31142.1	1544.8	19.0	1641.2	13.4	1767.0	16.0	87.42501414827392	quartzite	metamorphic	459	13629	3603	Harkless Fm	516.1	526.15	False	1767.0
1715	28654	4DB4	10.1130/B30235.1	2850.1	70.4	2835.6	70.2	2825.3	110.0	100.87778289031253	sandstone	sedimentary	510	15822	4187	Indian Meadows Fm	53.95	56.0	True	2850.1	Cenozoic
1716	29190	XOM-MDB-80	10.1130/G35513.1	2844.7	43.8	2838.6	18.6	2834.2	7.0	100.37047491355585	sandstone	sedimentary	518	16247	4268	Frio Fm	24.2975	28.1	True	2834.2	Cenozoic
1717	43165	BENYON-250	10.2110/jsr.2014.16	1042.7	21.2	1044.9	49.0	1049.5	144.4	99.35207241543593	sandstone	sedimentary	1625	37218	9542	McMurray Fm	111.75	125.0	True	1042.7	Mesozoic
1718	28682	07SR1	10.1130/B30029.1	39.7	0.4	41.3	3.1	134.5	176.3	29.516728624535315	conglomerate	sedimentary	465	13941	3704	Needles Range Fm	26.072	26.579	True	39.7
1719	30844	08MC09	http://digitalscholarship.unlv.edu/thesesdissertations/145	1870.3	29.6	1862.5	54.6	1853.9	111.0	100.884621608501	sandstone	sedimentary	468	14065	3728	Muddy Creek Fm	5.333	11.62	True	1870.3	Cenozoic
1720	29158	XOM-MDB-47	10.1130/G35513.1	160.2	12.0	159.5	32.0	149.8	477.0	106.9425901201602	sandstone	sedimentary	165	5752	1344	Wilcox Gp	41.3	56.0	True	160.2
1721	29051	DK0108	10.1130/B30824.1	173.7	4.2	176.1	15.6	208.0	215.6	83.50961538461539	sandstone	sedimentary	515	15992	4229	Cloverly Fm	130.275	145.0	True	173.7
1722	34276	LM2-1262	http://gsabulletin.gsapubs.org/content/113/9/1234.short	1057.0	48.0			851.0	662.0	124.20681551116334	sandstone	sedimentary	618	18832	4926	Summerside	509.35	516.1	True	1057.0	Cambrian
1723	43612	10095	10.1130/B30843.1	1142.0	32.0			1191.0	54.0	95.88581024349287	sandstone	sedimentary	1571	35871	9069	Taconite River Fm	445.8333	446.4667	True	1142.0	Paleozoic*
1724	33948	12MP55	10.1130/L475.1	467.3	3.4	463.9	4.4	447.4	19.7	104.44792132320072	sandstone	sedimentary	425	11184	3018	Karheen Fm	387.7	412.9	True	467.3
1725	28863	DO109	http://specialpapers.gsapubs.org/content/487/63.abstract	2394.0	31.0	2434.1	14.4	2467.0	3.5	97.04094041345765	sandstone	sedimentary	332	9034	2282	Renova Fm	23.03	38.675	False	2467.0
1726	28870	04SASC	10.1130/B30657.1	1221.0	16.0	1229.0	40.0	1244.0	108.0	98.15112540192926	sandstone	sedimentary	55	2029	313	Bliss Fm	483.475	493.575	True	1221.0	Cambrian
1727	34178	05KP42	http://www.carleton.edu/departments/geol/Resources/comps/CompsPDFfiles/2006CompsPapers/Lundquist2006.pdf	2685.7	28.0	2690.6	60.3	2682.0	12.2	100.137956748695	quartzite	metamorphic	192	6172	1477	Palms Fm	1937.5	2162.5	True	2682.0
1728	40922	DR1	10.2475/01.2007.05	465.6	11.0						metasedimentary	metamorphic	387	10587	2762	Hebron Gneiss	420.15	449.0	True	465.6
1729	34014	CO13-Ec-1Jmt	10.1130/L467.1	1327.7	24.9	1324.6	19.4	1319.7	31.3	100.60619837841934	sandstone	sedimentary	500	15412	4091	Morrison Fm	150.325	157.3	True	1327.7	Mesozoic
1730	34159	Parry6	10.1139/e2012-067	1244.9	28.4	1211.2	40.4	1303.6	16.3	95.49708499539736	sandstone	sedimentary	1521	35047	8834	Consett Head Mbr	361.1167	363.3333	True	1303.6	Paleozoic*
1731	34159	Parry6	10.1139/e2012-067	1244.9	28.4	1211.2	40.4	1303.6	16.3	95.49708499539736	sandstone	sedimentary	1521	35046	8834	Cape Fortune Mbr	363.3333	368.875	True	1303.6	Paleozoic*
1732	34159	Parry6	10.1139/e2012-067	1244.9	28.4	1211.2	40.4	1303.6	16.3	95.49708499539736	sandstone	sedimentary	1521	35045	8834	Burnett Point Mbr	368.875	374.5625	True	1303.6	Paleozoic*
1733	43178	WellMid	10.2110/jsr.2013.59	1047.3	41.1	1040.9	46.7	1027.6	116.6	101.91708836123006	siltstone	sedimentary	22	763	107	Wellington Fm	279.7375	282.0	True	1047.3	Paleozoic*
1734	34160	Parry7	10.1139/e2012-067	1988.9	24.4	2018.6	35.3	1958.3	16.4	101.56257978859215	sandstone	sedimentary	1517	34961	8808	Parry Islands Fm	368.875	374.5625	True	1958.3	Paleozoic*
1735	40699	11HW-09	10.2475/06.2015.02	96.9	2.6	97.7	19.6	119.0	490.6	81.42857142857143	sandstone	sedimentary	413	11097	2972	Orca Gp	53.95	64.9	True	96.9
1736	29059	FH0110	10.1130/B30824.1	2915.5	88.0	2850.9	38.0	2805.6	21.6	103.91716566866268	sandstone	sedimentary	515	16018	4233	Flathead Sandstone	503.5	511.0	True	2805.6	Cambrian
1737	29942	CG11-8	10.1130/GES00917.1	1479.0	22.0	1475.0	14.0	1474.8	41.6	100.28478437754272	sandstone	sedimentary	526	16840	4323	Lower Fleming Mbr	14.3575	28.1	True	1479.0	Cenozoic
1738	29942	CG11-8	10.1130/GES00917.1	1479.0	22.0	1475.0	14.0	1474.8	41.6	100.28478437754272	sandstone	sedimentary	526	16839	4323	Middle Fleming Mbr	11.62	14.3575	True	1479.0	Cenozoic
1739	29942	CG11-8	10.1130/GES00917.1	1479.0	22.0	1475.0	14.0	1474.8	41.6	100.28478437754272	sandstone	sedimentary	526	16838	4323	Upper Fleming Mbr	3.6	11.62	True	1479.0	Cenozoic
1740	35327	TD1F105	10.1130/G33746.1	178.6	5.8	176.9	31.6				sandstone	sedimentary	251	6864	1743	Lower Markley Sandstone Mbr	40.425	42.925	True	178.6
1741	35327	TD1F105	10.1130/G33746.1	178.6	5.8	176.9	31.6				sandstone	sedimentary	251	6862	1743	Upper Markley Sandstone Mbr	37.8	38.675	True	178.6
1742	34015	CO13-Ec-2Jmt	10.1130/L467.1	199.5	4.2	201.9	20.8	229.1	258.1	87.07987778262768	sandstone	sedimentary	500	15412	4091	Morrison Fm	150.325	157.3	True	199.5
1743	29065	MH0110	10.1130/B30824.1	1734.4	58.0	1753.6	32.6	1776.7	15.8	97.61918162886249	sandstone	sedimentary	515	15991	4229	Mowry Shale	100.5	125.0	True	1776.7	Mesozoic
1744	29132	XOM-MDB-19	10.1130/G35513.1	984.8	27.6	1006.1	24.4	1052.6	47.8	93.55880676420293	sandstone	sedimentary	531	17122	4364	Wilcox Gp	53.2667	58.4	True	984.8	Cenozoic
1745	28730	6135	10.1130/B30260.1	300.5	5.2			394.9	99.0	76.09521397822233	sandstone	sedimentary	290	7500	1979	Snowshoe Fm	165.45	176.25	True	300.5
1746	35712	K03DV03	10.1016/j.precamres.2014.06.005	1731.8	24.0	1741.0	21.2	1752.0	36.6	98.84703196347031	conglomerate	sedimentary	464	13875	3691	Crystal Spring Fm	686.0	703.0	True	1731.8
1747	28577	T3	10.1130/B30120.1	1148.8	14.8	1123.7	29.9	1137.5	58.4	100.99340659340659	sandstone	sedimentary	1657	38191	9877	Imperial Fm	362.225	382.7	True	1148.8	Paleozoic*
1748	33997	05W170	10.1130/L451.1	325.8	8.6	321.5	11.8	290.0	75.8	112.3448275862069	sandstone	sedimentary	1454	33648	8231	Lewes River	213.125	228.6667	True	325.8
1749	33997	05W170	10.1130/L451.1	325.8	8.6	321.5	11.8	290.0	75.8	112.3448275862069	sandstone	sedimentary	1454	33647	8231	Lewes River	228.6667	238.25	True	325.8
1750	29031	10ANK16	10.1130/B30818.1	153.0	6.0	144.0	20.0				sandstone	sedimentary	413	11096	2971	Valdez Gp	67.525	83.6	True	153.0
1751	29195	51104	10.1130/B30999.1	1804.4	22.1	1814.0	14.0	1825.1	15.9	98.8658155717495	sandstone	sedimentary	513	15943	4217	Frontier Fm	95.022	100.5	True	1825.1	Mesozoic
1752	41555	61206-2	10.2475/05.2010.01	407.9	14.4						quartzite	metamorphic	377	10407	2689	Gile Mountain Fm	410.0	412.9	True	407.9
1753	29094	CS12-3	10.1130/B30884.1	512.0	18.0	510.0	19.0	503.0	35.0	101.7892644135189	sandstone	sedimentary	57	2075	10064	Van Horn Sandstone	515.19	519.6	True	512.0
1754	28680	06SP29-30	10.1130/B30029.1	1229.6	15.4	1224.1	12.6	1214.4	21.9	101.25164690382081	siltstone	sedimentary	465	13948	3704	Sheep Pass Fm	34.875	46.175	True	1229.6	Cenozoic
1755	28530	IONA	10.1130/G30509.1	1000.3	52.2	1036.1	38.6	1112.5	37.4	89.91460674157304	sandstone	sedimentary	429	11400	3071	Red and Green Beds	308.1	309.9	True	1112.5	Paleozoic*
1756	35327	TD1F105	10.1130/G33746.1	108.1	4.4	104.0	21.4				sandstone	sedimentary	251	6864	1743	Lower Markley Sandstone Mbr	40.425	42.925	True	108.1
1757	35327	TD1F105	10.1130/G33746.1	108.1	4.4	104.0	21.4				sandstone	sedimentary	251	6862	1743	Upper Markley Sandstone Mbr	37.8	38.675	True	108.1
1758	29065	MH0110	10.1130/B30824.1	98.0	5.0	98.4	11.2	108.5	255.6	90.3225806451613	sandstone	sedimentary	515	15991	4229	Mowry Shale	100.5	125.0	True	98.0
1759	29158	XOM-MDB-47	10.1130/G35513.1	55.8	2.8	57.3	10.2	120.1	416.8	46.46128226477935	sandstone	sedimentary	165	5752	1344	Wilcox Gp	41.3	56.0	True	55.8
1760	29054	EB0210	10.1130/B30824.1	83.9	8.2	71.1	42.2				sandstone	sedimentary	515	16008	4229	Mesaverde Fm	80.725	90.825	True	83.9
1761	28650	2DB273	10.1130/B30235.1	1072.0	49.8	1075.3	39.4	1082.1	62.0	99.06662970150633	sandstone	sedimentary	510	15822	4187	Indian Meadows Fm	53.95	56.0	True	1072.0	Cenozoic
1762	43613	10091	10.1130/B30843.1	1174.0	38.0			385.0	744.0	304.93506493506493	sandstone	sedimentary	1572	35879	9073	Lorimer Ridge Fm	444.0333	444.2667	True	1174.0	Paleozoic*
1763	28861	CLA608	http://specialpapers.gsapubs.org/content/487/63.abstract	1518.0	28.1	1599.5	21.4	1708.2	30.6	88.86547242711626	sandstone	sedimentary	332	9034	2282	Renova Fm	23.03	38.675	False	1518.0
1764	40700	11HW-23	10.2475/06.2015.02	1809.5	68.2	1799.7	37.4	1788.3	18.2	101.18548342000783	sandstone	sedimentary	413	11097	2972	Orca Gp	53.95	64.9	True	1788.3	Cenozoic
1765	34342	SERV	10.1130/0-8137-1197-5.459	1199.0	46.0			1259.0	244.0	95.23431294678316	sandstone	sedimentary	15	399	73	Sandsuck Shale	541.0	550.4	True	1199.0	Cambrian
1766	29140	XOM-MDB-27	10.1130/G35513.1	1364.9	70.2	1383.6	44.6	1412.6	29.4	96.62324791165227	sandstone	sedimentary	527	16912	4331	Nanafalia Fm	56.8	58.1333	True	1412.6	Cenozoic
1767	29140	XOM-MDB-27	10.1130/G35513.1	1364.9	70.2	1383.6	44.6	1412.6	29.4	96.62324791165227	sandstone	sedimentary	527	16911	4331	Tuscahoma Fm	54.975	56.8	True	1412.6	Cenozoic
1768	29140	XOM-MDB-27	10.1130/G35513.1	1364.9	70.2	1383.6	44.6	1412.6	29.4	96.62324791165227	sandstone	sedimentary	527	16910	4331	Bashi Fm	53.95	54.975	True	1412.6	Cenozoic
1769	29140	XOM-MDB-27	10.1130/G35513.1	1364.9	70.2	1383.6	44.6	1412.6	29.4	96.62324791165227	sandstone	sedimentary	527	16909	4331	Hatchetigbee Fm	52.925	53.95	True	1412.6	Cenozoic
1770	28833	07-YHL-44	10.1130/B30530.1	1469.0	52.0	1480.0	52.0	1474.0	20.0	99.6607869742198	sandstone	sedimentary	1653	38100	9839	Saline River Fm	501.0	503.5	True	1474.0	Cambrian
1771	40788	MIL1	10.2475/10.2012.01	406.8	9.6						paragneiss	metamorphic	384	10532	2734	Massabesic Gneiss	443.8	477.7	True	406.8
1772	42885	C-86116	10.1139/E10-006	1875.0	46.0	1864.0	28.0	1851.0	28.0	101.29659643435981	sandstone	sedimentary	1541	35486	8934	Isachsen Fm	116.0	126.1	True	1851.0	Mesozoic
1773	40918	ME-K	10.2475/01.2007.05	1095.0	11.0			1069.0	56.0	102.43217960710945	quartzite	metamorphic	385	10563	2747	Kittery Fm	448.05	450.0	True	1095.0	Paleozoic*
1774	43169	BENYON-216	10.2110/jsr.2014.16	1068.5	36.4	1067.8	32.8	1066.4	66.6	100.19692423105776	sandstone	sedimentary	1625	37220	9542	Wabiskaw Fm	109.25	110.5	True	1068.5	Mesozoic
1775	28638	OS082288	10.1130/G31335.1	1815.7	87.8	1800.4	47.0	1782.7	8.8	101.85112469849105	metasedimentary	metamorphic	491	15025	3995	Vishnu Schist	1690.0	1887.5	True	1782.7
1776	28635	KO69671	10.1130/G31335.1	1727.4	30.4	1729.1	50.6	1731.2	105.8	99.78049907578558	metasedimentary	metamorphic	491	15025	3995	Vishnu Schist	1690.0	1887.5	True	1727.4
1777	43176	12-LHCC07	10.2110/jsr.2014.33	1087.1	24.3	1083.1	19.5	1074.9	32.9	101.13498930133036	sandstone	sedimentary	491	15052	4003	Wahweap Sandstone	84.275	87.175	True	1087.1	Mesozoic
1778	28676	05SP14-20	10.1130/B30029.1	1084.3	10.0	1093.9	12.5	1113.0	31.6	97.42138364779875	conglomerate	sedimentary	465	13948	3704	Sheep Pass Fm	34.875	46.175	True	1084.3	Cenozoic
1779	28716	BTC	10.1130/G31762.1	2093.9	38.8	2103.2	23.8	2112.3	27.5	99.12891161293376	conglomerate	sedimentary	1641	37797	9719	Cadomin Fm	122.0	126.1	True	2112.3	Mesozoic
1780	37271	9LB04	10.1130/L557.1	1694.0	25.0	1695.0	16.0	1696.0	19.0	99.88207547169812	sandstone	sedimentary	324	8727	2200	Little Copper Mbr of Copper Basin Fm	353.35	357.05	True	1696.0	Paleozoic*
1781	40234	12JT32	10.1130/L533.1	1940.0	86.0	1963.0	63.0	1971.0	95.0	98.42719431760527	sandstone	sedimentary	152	5332	1258	Neruokpuk Quartzite	541.0	598.375	True	1940.0	Cambrian
1782	40706	TI10-04	10.2475/06.2015.02	69.2	6.6	60.5	23.2				sandstone	sedimentary	413	11097	2972	Orca Gp	53.95	64.9	True	69.2
1783	29172	XOM-MDB-62	10.1130/G35513.1	102.6	4.0	101.7	8.6	81.0	188.0	126.66666666666667	sandstone	sedimentary	518	16247	4268	Frio Fm	24.2975	28.1	True	102.6
1784	28718	EBK	10.1130/G31762.1	1990.7	12.2	1996.8	10.1	2003.1	16.2	99.38095951275523	conglomerate	sedimentary	1641	37797	9719	Cadomin Fm	122.0	126.1	True	1990.7	Mesozoic
1785	28870	04SASC	10.1130/B30657.1	1614.0	26.0	1615.0	18.0	1616.0	26.0	99.87623762376238	sandstone	sedimentary	55	2029	313	Bliss Fm	483.475	493.575	True	1614.0	Cambrian
1786	30849	08MC29	http://digitalscholarship.unlv.edu/thesesdissertations/145	2651.4	63.4	2652.0	37.4	2652.5	44.4	99.95852968897266	sandstone	sedimentary	468	14065	3728	Muddy Creek Fm	5.333	11.62	True	2652.5	Cenozoic
1787	35703	11RMSS5	10.1016/j.precamres.2014.06.005	1811.4	52.6	1805.8	31.6	1799.5	31.0	100.66129480411225	greywacke	sedimentary	464	13874	3691	Beck Spring Dolomite	677.5	686.0	True	1799.5
1788	29177	XOM-MDB-67	10.1130/G35513.1	1181.4	25.8	1185.4	18.8	1192.8	24.2	99.04426559356136	sandstone	sedimentary	520	16415	4285	Wilcox Fm	49.85	53.2667	True	1192.8	Cenozoic
1789	29215	Sam-18	10.1130/B30999.1	1029.1	68.2	1035.2	57.2	1048.1	102.8	98.18719587825589	sandstone	sedimentary	501	15433	4094	Mesaverde Gp	66.0	74.975	True	1029.1	Mesozoic
1790	34497	7809	10.1130/B25989.1	2656.0	52.0			2720.0	22.0	97.6470588235294	sandstone	sedimentary	757	22001	6028	Dunvegan	1326.25	1351.0	True	2720.0
1791	43650	VP09-08	10.1144/jgs2014-027	1990.0	59.0	1965.0	61.0	1927.0	62.0	103.26933056564609	sandstone	sedimentary	1562	35765	9021	Danish River Fm	427.4	438.5	True	1990.0	Paleozoic*
1792	28694	B_Angel_2	10.1130/L121.1	1452.0	28.0	1465.0	22.0	1482.0	32.0	97.97570850202429	shale	sedimentary	491	15028	3997	Bright Angel Shale	498.925	506.75	True	1452.0	Cambrian
1793	29201	51205	10.1130/B30999.1	490.4	14.7	515.1	80.7	626.5	426.0	78.27613727055068	sandstone	sedimentary	507	15705	4162	Adaville Fm	90.825	92.875	True	490.4
1794	29026	10ANJ58	10.1130/B30818.1	1616.0	102.0	1634.0	66.0	1656.0	68.0	97.58454106280193	sandstone	sedimentary	413	11096	2971	Valdez Gp	67.525	83.6	True	1656.0	Mesozoic
1795	40702	11HW-33	10.2475/06.2015.02	64.3	2.0	66.7	7.6	154.4	263.2	41.645077720207254	sandstone	sedimentary	413	11097	2972	Orca Gp	53.95	64.9	True	64.3
1796	29050	DB0110	10.1130/B30824.1	99.9	6.6	97.2	31.8	32.8	811.6	304.5731707317073	sandstone	sedimentary	515	15990	4229	Frontier Fm	95.022	100.5	True	99.9
1797	43200	CP42	10.2110/jsr.2008.088	1292.8	83.2	1290.2	55.6	1285.7	53.6	100.55222835809288	sandstone	sedimentary	483	14779	3927	Chinle Fm	206.7	237.0	True	1285.7	Mesozoic
1798	35270	93EAB10	10.1130/B30860.1	2775.6	87.0	2753.4	37.0	2737.2	9.2	101.40289346777729	diamictite	sedimentary	477	14498	3843	Perry Canyon Fm	663.3331	668.0557	True	2737.2
1799	28697	Coconino2	10.1130/L121.1	1145.0	30.0	1138.0	30.0	1124.0	64.0	101.86832740213524	sandstone	sedimentary	491	15035	4000	Coconino Sandstone	275.2125	279.7375	True	1145.0	Paleozoic*
1800	32525	102-97-481	10.1016/j.precamres.2013.09.012					2734.7	8.4		sandstone	sedimentary	776	22250	6173	Island Lake Gp unnamed 1	2710.0	2740.0	True	2734.7
1801	32525	102-97-481	10.1016/j.precamres.2013.09.012					2734.7	8.4		sandstone	sedimentary	776	22249	6173	Island Lake Gp unnamed 2	2680.0	2710.0	True	2734.7
1802	37270	6PL13	10.1130/L557.1	1854.0	20.0	1850.0	11.0	1846.0	5.0	100.43336944745396	quartzite	metamorphic	324	8736	2206	Phi Kappa Fm	431.9	475.1334	True	1846.0	Paleozoic*
1803	29212	51219	10.1130/B30999.1	2871.0	57.7	2800.6	24.1	2750.3	7.3	104.38861215140167	sandstone	sedimentary	504	15543	4128	Ericson Sandstone	81.6833	89.8	False	2750.3
1804	28832	07-LG-14	10.1130/B30530.1	1324.0	47.0	1349.0	49.0	1353.0	21.0	97.85661492978566	sandstone	sedimentary	1653	38100	9839	Saline River Fm	501.0	503.5	True	1353.0	Cambrian
1805	34564	741-1	10.1130/B26399.1	478.7	11.0			562.0	160.0	85.1779359430605	greywacke	sedimentary	548	17639	4574	Franciscan Subduction Complex	139.8	150.325	True	478.7
1806	34719	C403747	10.1144/M35.37	231.0	6.0						sandstone	sedimentary	1538	35409	8914	Sandy Point Fm	170.395	171.25	True	231.0
1807	34911	37-FC063	10.1130/GES00982.1	163.1	8.0	180.4	17.6				sandstone	sedimentary	222	6547	1598	Imperial Fm	3.347	4.0333	True	163.1
1808	31647	MR1	http://www.nature.com/ngeo/journal/v1/n8/abs/ngeo259.html					1171.6	26.6		sand	sedimentary	137	5016	1141	Potomac Fm	98.85	157.3	True	1171.6	Mesozoic
1809	45605	06K5714	https://doi.org/10.1130/B31532.1	1736.0	30.0	1739.0	30.0	1742.0	21.0	99.65556831228473	sandstone	sedimentary	491	36852	9433	Carbon Butte Member	736.8	742.4	True	1742.0
1810	45593	L-Nankoweap	https://doi.org/10.1130/B31532.1	1000.0	26.0	1011.0	36.0	1037.0	46.8	96.43201542912247	sandstone	sedimentary	491	36857	9434	Nankoweap Fm	767.6	770.4	True	1000.0
1811	43614	10087	10.1130/B30843.1	1330.0	28.0			1324.0	46.0	100.45317220543807	sandstone	sedimentary	1572	35879	9073	Lorimer Ridge Fm	444.0333	444.2667	True	1330.0	Paleozoic*
1812	33950	12MP57	10.1130/L475.1	589.6	11.7	584.5	14.4	564.8	54.0	104.39093484419263	conglomerate	sedimentary	425	11187	3018	Descon Fm	407.6	470.0	True	589.6	Paleozoic*
1813	31611	20618	http://www.nature.com/ngeo/journal/v1/n8/abs/ngeo259.html	138.2	3.4						sand	sedimentary	236	6746	1691	Hornbrook Fm	70.575	85.625	True	138.2
1814	28833	07-YHL-44	10.1130/B30530.1	1524.0	52.0	1685.0	59.0	1905.0	22.0	80.0	sandstone	sedimentary	1653	38100	9839	Saline River Fm	501.0	503.5	False	1905.0
1815	43652	C-054480	10.1144/jgs2014-027	614.0	23.0	622.0	24.0	560.0	110.0	109.64285714285714	sandstone	sedimentary	1566	35810	9042	Lands Lokk Fm	426.3	433.4	True	614.0	Paleozoic*
1816	34918	44-FC06-2	10.1130/GES00982.1	2450.8	189.8	2546.6	88.8	2623.7	33.4	93.410069748828	sandstone	sedimentary	825	22959	6465	Diablo Fm of Palm Spring Gp	2.588	4.0333	True	2623.7	Cenozoic
1817	40665	LA3	10.1306/10191515029	620.5	17.2	622.1	19.8	628.2	66.4	98.77427570837312	sandstone	sedimentary	1625	37218	9542	McMurray Fm	111.75	125.0	True	620.5	Mesozoic
1818	28708	Tem_Butte1	10.1130/L121.1	1736.0	130.0	1720.0	86.0	1700.0	106.0	102.11764705882354	conglomerate	sedimentary	491	15031	3998	Temple Butte Limestone	358.9	379.925	True	1700.0	Paleozoic*
1819	40657	CW2	10.1306/10191515029	1279.6	27.0	1292.4	22.8	1313.8	40.6	97.39686405845639	sandstone	sedimentary	1625	37218	9542	McMurray Fm	111.75	125.0	True	1279.6	Mesozoic
1820	29186	XOM-MDB-76	10.1130/G35513.1	73.1	2.6	71.6	6.4	22.9	202.4	319.2139737991266	sandstone	sedimentary	165	5752	1344	Wilcox Gp	41.3	56.0	True	73.1
1821	35339	CB55	http://scielo.unam.mx/pdf/rmcg/v23n3/v23n3a2.pdf	416.0	12.0	403.0	48.0	329.0	326.0	126.44376899696049	sandstone	sedimentary	1431	33135	7741	Santa Rosa	304.975	317.125	True	416.0
1822	35339	CB55	http://scielo.unam.mx/pdf/rmcg/v23n3/v23n3a2.pdf	416.0	12.0	403.0	48.0	329.0	326.0	126.44376899696049	sandstone	sedimentary	1431	33134	7740	Santa Rosa	332.125	349.975	True	416.0
1823	28676	05SP14-20	10.1130/B30029.1	3084.5	37.7	3109.0	17.8	3124.8	16.1	98.71031746031746	conglomerate	sedimentary	465	13948	3704	Sheep Pass Fm	34.875	46.175	True	3124.8	Cenozoic
1824	29186	XOM-MDB-76	10.1130/G35513.1	2649.8	198.4	2703.6	86.8	2744.0	17.0	96.567055393586	sandstone	sedimentary	165	5752	1344	Wilcox Gp	41.3	56.0	True	2744.0	Cenozoic
1825	42831	JL2	10.1139/E09-065	376.6	14.1	399.5	39.7	373.0	222.8	100.9651474530831	sandstone	sedimentary	1480	34196	8485	Jones Lake Fm	243.3	251.3	True	376.6
1826	28870	04SASC	10.1130/B30657.1	1474.0	76.0	1521.0	48.0	1586.0	44.0	92.93820933165196	sandstone	sedimentary	55	2029	313	Bliss Fm	483.475	493.575	True	1586.0	Cambrian
1827	28707	Tapeats2	10.1130/L121.1	1448.0	66.0	1453.0	54.0	1459.0	90.0	99.24605894448253	sandstone	sedimentary	491	15029	3997	Tapeats Sandstone	506.75	508.775	True	1448.0	Cambrian
1828	28580	TS	10.1130/B30120.1	1714.2	105.8	1700.0	217.1	1698.9	232.9	100.90058273000177	sandstone	sedimentary	1657	38191	9877	Imperial Fm	362.225	382.7	True	1714.2	Paleozoic*
1829	37455	B1	10.1130/GES01313.1	1655.6	44.4	1614.8	43.4	1707.9	82.8	96.93775982200363	sandstone	sedimentary	519	16318	4277	Carrizo Fm	49.85	51.9	True	1655.6	Cenozoic
1830	29190	XOM-MDB-80	10.1130/G35513.1	1643.7	38.4	1647.4	22.2	1652.3	12.6	99.47951340555589	sandstone	sedimentary	518	16247	4268	Frio Fm	24.2975	28.1	True	1652.3	Cenozoic
1831	28681	07NW2	10.1130/B30029.1	435.5	4.2	430.4	13.9	402.8	85.8	108.11817279046673	siltstone	sedimentary	463	13837	3673	Newark Canyon Fm	113.0	122.0	True	435.5
1832	28959	XOM-AOS-14	10.1130/G35513.1	1160.4	58.2	1162.7	39.2	1167.0	29.0	99.43444730077121	sandstone	sedimentary	1625	37221	9542	Grand Rapids Fm	108.0	109.25	True	1167.0	Mesozoic
1833	43188	CUR	10.2110/jsr.2008.088	1033.8	49.1	1026.5	39.5	1010.8	67.1	102.27542540561932	sandstone	sedimentary	462	13759	3653	Chinle Fm	201.3	234.5	True	1033.8	Mesozoic
1834	43652	C-054480	10.1144/jgs2014-027	987.0	24.0	988.0	23.0	1011.0	28.0	97.62611275964392	sandstone	sedimentary	1566	35810	9042	Lands Lokk Fm	426.3	433.4	True	987.0	Paleozoic*
1835	28868	REN108	http://specialpapers.gsapubs.org/content/487/63.abstract	77.3	1.0	83.2	19.6	255.0	570.7	30.313725490196077	sandstone	sedimentary	332	9034	2282	Renova Fm	23.03	38.675	True	77.3
1836	45380	K05771	10.1016/j.precamres.2017.03.006	1756.0	30.0	1754.0	23.4	1751.5	36.6	100.25692263773908	sandstone	sedimentary	491	36863	3996	Hotauta Conglomerate	1250.0	1254.0	True	1756.0
1837	45380	K05771	10.1016/j.precamres.2017.03.006	1756.0	30.0	1754.0	23.4	1751.5	36.6	100.25692263773908	sandstone	sedimentary	491	36862	3996	Bass Limestone	1244.0	1250.0	True	1756.0
1838	45380	K05771	10.1016/j.precamres.2017.03.006	1756.0	30.0	1754.0	23.4	1751.5	36.6	100.25692263773908	sandstone	sedimentary	491	36861	3996	Hakatai Shale	1180.0	1244.0	True	1756.0
1839	45380	K05771	10.1016/j.precamres.2017.03.006	1756.0	30.0	1754.0	23.4	1751.5	36.6	100.25692263773908	sandstone	sedimentary	491	36860	3996	Shinumo Quartzite	1140.0	1180.0	True	1756.0
1840	45380	K05771	10.1016/j.precamres.2017.03.006	1756.0	30.0	1754.0	23.4	1751.5	36.6	100.25692263773908	sandstone	sedimentary	491	36859	3996	Dox Sandstone	1108.0	1140.0	True	1756.0
1841	45380	K05771	10.1016/j.precamres.2017.03.006	1756.0	30.0	1754.0	23.4	1751.5	36.6	100.25692263773908	sandstone	sedimentary	491	36858	3996	Cardenas lavas	1100.0	1108.0	True	1756.0
1842	29103	XOM-AOS-04	10.1130/G35513.1	1827.3	98.2	1813.8	106.8	1798.4	200.4	101.60698398576513	sandstone	sedimentary	1625	37218	9542	McMurray Fm	111.75	125.0	True	1827.3	Mesozoic
1843	45597	CDGC5	https://doi.org/10.1130/B31532.1	1888.0	44.0	1880.0	28.0	1871.0	19.6	100.90860502405131	sandstone	sedimentary	491	36857	9434	Nankoweap Fm	767.6	770.4	True	1871.0
1844	42906	FCB-AD	http://ir.uiowa.edu/etd/3119	1177.0	35.0	1208.0	41.2	1264.0	94.4	93.11708860759494	sandstone	sedimentary	90	3423	691	Cherokee Gp	311.0	319.0	True	1177.0	Paleozoic*
1845	37462	Q	10.1130/GES01313.1	71.8	9.5	77.6	11.1	258.3	73.2	27.797135114208285	sandstone	sedimentary	520	16412	4285	Queen City Fm	42.925	46.175	True	71.8
1846	31647	MR1	http://www.nature.com/ngeo/journal/v1/n8/abs/ngeo259.html	1043.3	29.6						sand	sedimentary	137	5016	1141	Potomac Fm	98.85	157.3	True	1043.3	Mesozoic
1847	43194	CP17	10.2110/jsr.2008.088	290.0	8.4	299.8	41.6	377.0	354.0	76.92307692307692	sandstone	sedimentary	495	15195	4029	Chinle Fm	206.7	237.0	True	290.0
1848	28635	KO69671	10.1130/G31335.1	1836.0	49.2	1830.6	35.0	1824.5	50.0	100.63030967388326	metasedimentary	metamorphic	491	15025	3995	Vishnu Schist	1690.0	1887.5	True	1836.0
1849	43652	C-054480	10.1144/jgs2014-027	1006.0	22.0	1003.0	24.0	1005.0	21.0	100.09950248756219	sandstone	sedimentary	1566	35810	9042	Lands Lokk Fm	426.3	433.4	True	1005.0	Paleozoic*
1850	40673	LL4	10.1306/10191515029	1041.3	45.2	1036.2	36.2	1025.4	61.2	101.55061439438268	sandstone	sedimentary	1625	37218	9542	McMurray Fm	111.75	125.0	True	1041.3	Mesozoic
1851	43198	CP28	10.2110/jsr.2008.088	516.2	11.0	490.5	59.6	372.4	341.8	138.6143931256713	sandstone	sedimentary	488	14921	3971	Santa Rosa Sandstone	229.5	237.0	True	516.2
1852	42884	C-82218	10.1139/E10-006	1756.0	110.0	1774.0	62.0	1794.0	32.0	97.88182831661092	sandstone	sedimentary	1544	35525	8947	Isachsen Fm	116.0	126.1	True	1794.0	Mesozoic
1853	28880	09SL1	10.1130/B30657.1	1601.0	24.0	1626.0	48.0	1657.0	104.0	96.62039831019915	sandstone	sedimentary	52	1873	281	Bliss Fm	483.475	493.575	True	1601.0	Cambrian
1854	40707	TI10-07	10.2475/06.2015.02	71.3	12.2	74.5	38.4	178.3	1195.8	39.98878295008413	sandstone	sedimentary	417	11133	2992	Orca Gp	56.8	62.7	True	71.3
1855	40695	RB12-02	10.2475/06.2015.02	78.1	3.2	83.1	23.0	227.6	661.6	34.31458699472759	sandstone	sedimentary	413	11097	2972	Orca Gp	53.95	64.9	True	78.1
1856	35247	1105NC4	10.1130/B30848.1	1108.4	50.6	1108.7	43.8	1109.4	83.8	99.90986118622679	sandstone	sedimentary	1659	38226	9894	Rapitan Gp	690.25	720.0	True	1108.4
1857	42913	IB-D2	http://ir.uiowa.edu/etd/3119	1016.0	24.4	1027.0	26.6	1052.0	64.2	96.57794676806084	sandstone	sedimentary	432	13132	3464	Bernadotte Sandstone Mbr	312.9333	313.8813	True	1016.0	Paleozoic*
1858	29197	51106	10.1130/B30999.1	1063.9	30.5	1052.0	52.9	1027.5	150.7	103.54257907542579	sandstone	sedimentary	485	14882	3957	Dakota Fm	102.625	106.8125	True	1063.9	Mesozoic
1859	29038	560110	10.1130/B30824.1	96.6	11.6	97.3	23.8	115.0	536.0	84.0	sandstone	sedimentary	515	15990	4229	Frontier Fm	95.022	100.5	True	96.6
1860	29192	51101	10.1130/B30999.1	159.1	11.5	170.9	35.2	337.2	481.0	47.18268090154211	sandstone	sedimentary	512	15908	8850	Lakota Fm	138.075	145.0	True	159.1
1861	37271	9LB04	10.1130/L557.1	1764.0	28.0	1804.0	20.0	1851.0	27.0	95.2998379254457	sandstone	sedimentary	324	8727	2200	Little Copper Mbr of Copper Basin Fm	353.35	357.05	False	1851.0
1862	37261	09LR01	10.1130/L557.1	1663.0	34.0			2068.0	18.0	80.41586073500967	quartzite	metamorphic	325	8781	2219	Kinnikinic Quartzite	456.5	470.0	True	2068.0	Paleozoic*
1863	34015	CO13-Ec-2Jmt	10.1130/L467.1	577.4	11.5	571.7	14.0	549.0	53.1	105.17304189435337	sandstone	sedimentary	500	15412	4091	Morrison Fm	150.325	157.3	True	577.4	Mesozoic
1864	34014	CO13-Ec-1Jmt	10.1130/L467.1	548.4	13.4	530.1	28.4	452.1	141.8	121.30059721300597	sandstone	sedimentary	500	15412	4091	Morrison Fm	150.325	157.3	True	548.4	Mesozoic
1865	29129	XOM-MDB-14	10.1130/G35513.1	1243.3	29.0	1237.0	19.0	1225.9	14.0	101.4193653642222	sandstone	sedimentary	527	16912	4331	Nanafalia Fm	56.8	58.1333	True	1225.9	Cenozoic
1866	29129	XOM-MDB-14	10.1130/G35513.1	1243.3	29.0	1237.0	19.0	1225.9	14.0	101.4193653642222	sandstone	sedimentary	527	16911	4331	Tuscahoma Fm	54.975	56.8	True	1225.9	Cenozoic
1867	29129	XOM-MDB-14	10.1130/G35513.1	1243.3	29.0	1237.0	19.0	1225.9	14.0	101.4193653642222	sandstone	sedimentary	527	16910	4331	Bashi Fm	53.95	54.975	True	1225.9	Cenozoic
1868	29129	XOM-MDB-14	10.1130/G35513.1	1243.3	29.0	1237.0	19.0	1225.9	14.0	101.4193653642222	sandstone	sedimentary	527	16909	4331	Hatchetigbee Fm	52.925	53.95	True	1225.9	Cenozoic
1869	35341	08LT02	10.1080/00206814.2013.844313	1081.1	21.0	1089.2	34.6	1105.6	94.4	97.78400868306802	sandstone	sedimentary	1421	33271	7753	Las Trancas Fm	150.325	156.0	True	1081.1	Mesozoic
1870	28834	08-TH-05	10.1130/B30530.1	1816.0	50.0	1852.0	31.0	1893.0	33.0	95.93238246170101	sandstone	sedimentary	755	21969	6012	Glenelg	898.64	945.12	True	1893.0
1871	28834	08-TH-05	10.1130/B30530.1	1816.0	50.0	1852.0	31.0	1893.0	33.0	95.93238246170101	sandstone	sedimentary	755	21968	6012	Reynolds Point	880.16	898.64	True	1893.0
1872	28834	08-TH-05	10.1130/B30530.1	1816.0	50.0	1852.0	31.0	1893.0	33.0	95.93238246170101	sandstone	sedimentary	755	21967	6012	Minto	861.68	880.16	True	1893.0
1873	28834	08-TH-05	10.1130/B30530.1	1816.0	50.0	1852.0	31.0	1893.0	33.0	95.93238246170101	sandstone	sedimentary	755	21966	6012	Wynniatt	811.0	861.68	True	1893.0
1874	28834	08-TH-05	10.1130/B30530.1	1816.0	50.0	1852.0	31.0	1893.0	33.0	95.93238246170101	sandstone	sedimentary	755	21965	6012	Kilian	780.2	811.0	True	1893.0
1875	28635	KO69671	10.1130/G31335.1	2479.7	41.2	2486.1	44.6	2491.4	73.8	99.53038452275828	metasedimentary	metamorphic	491	15025	3995	Vishnu Schist	1690.0	1887.5	True	2479.7
1876	28635	KO69671	10.1130/G31335.1	1734.3	53.8	1728.1	55.4	1720.6	104.0	100.79623387190514	metasedimentary	metamorphic	491	15025	3995	Vishnu Schist	1690.0	1887.5	True	1734.3
1877	29093	CS12-1	10.1130/B30884.1	1454.0	46.0	1441.0	34.0	1423.0	27.0	102.1784961349262	sandstone	sedimentary	54	1940	302	Lanoria Quartzite	1034.0	1101.0	True	1423.0
1878	37798	EAH-10b	http://cedar.wwu.edu/wwuet/356/	414.6	52.9	419.5	45.4	446.3	20.2	92.89715438046157	paragneiss	metamorphic	1446	33546	8154	Yellow Aster Complex Fm	458.4	508.5	True	446.3
1879	43169	BENYON-216	10.2110/jsr.2014.16	1583.7	98.4	1647.2	64.8	1729.3	68.8	91.58040825767651	sandstone	sedimentary	1625	37220	9542	Wabiskaw Fm	109.25	110.5	True	1729.3	Mesozoic
1880	30826	26CS07	http://www.mbmg.mtech.edu/pdf-open-files/mbmg569/mbmg569.pdf	97.0	4.0						sandstone	sedimentary	331	9000	2271	Flood Mbr	109.875	116.0	True	97.0
1881	30826	26CS07	http://www.mbmg.mtech.edu/pdf-open-files/mbmg569/mbmg569.pdf	97.0	4.0						sandstone	sedimentary	331	8999	2271	Taft Hill Mbr	103.625	109.875	True	97.0
1882	30826	26CS07	http://www.mbmg.mtech.edu/pdf-open-files/mbmg569/mbmg569.pdf	97.0	4.0						sandstone	sedimentary	331	8998	2271	Vaughn Mbr	100.5	103.625	True	97.0
1883	30826	26CS07	http://www.mbmg.mtech.edu/pdf-open-files/mbmg569/mbmg569.pdf	97.0	4.0						sandstone	sedimentary	331	8997	2271	Dunkleberg Mbr	100.5	103.625	True	97.0
1884	34567	767-3	10.1130/B26399.1	185.2	4.8						greywacke	sedimentary	553	17703	4593	Franciscan Subduction Complex	83.6	152.1	True	185.2
1885	35253	18EAB10	10.1130/B30860.1	1026.5	76.4	1033.4	63.8	1048.2	113.8	97.92978439229155	diamictite	sedimentary	477	14498	3843	Perry Canyon Fm	663.3331	668.0557	True	1026.5
1886	28861	CLA608	http://specialpapers.gsapubs.org/content/487/63.abstract	70.7	4.7	101.4	38.4	901.0	840.2	7.846836847946726	sandstone	sedimentary	332	9034	2282	Renova Fm	23.03	38.675	True	70.7
1887	28874	07SD3a	10.1130/B30657.1	1286.0	36.0	1296.0	46.0	1314.0	108.0	97.86910197869102	sandstone	sedimentary	55	2029	313	Bliss Fm	483.475	493.575	True	1286.0	Cambrian
1888	28707	Tapeats2	10.1130/L121.1	1678.0	40.0	1705.0	36.0	1738.0	64.0	96.54775604142692	sandstone	sedimentary	491	15029	3997	Tapeats Sandstone	506.75	508.775	True	1678.0	Cambrian
1889	28834	08-TH-05	10.1130/B30530.1	1749.0	53.0	1787.0	32.0	1831.0	30.0	95.52157291097761	sandstone	sedimentary	755	21969	6012	Glenelg	898.64	945.12	True	1831.0
1890	28834	08-TH-05	10.1130/B30530.1	1749.0	53.0	1787.0	32.0	1831.0	30.0	95.52157291097761	sandstone	sedimentary	755	21968	6012	Reynolds Point	880.16	898.64	True	1831.0
1891	28834	08-TH-05	10.1130/B30530.1	1749.0	53.0	1787.0	32.0	1831.0	30.0	95.52157291097761	sandstone	sedimentary	755	21967	6012	Minto	861.68	880.16	True	1831.0
1892	28834	08-TH-05	10.1130/B30530.1	1749.0	53.0	1787.0	32.0	1831.0	30.0	95.52157291097761	sandstone	sedimentary	755	21966	6012	Wynniatt	811.0	861.68	True	1831.0
1893	28834	08-TH-05	10.1130/B30530.1	1749.0	53.0	1787.0	32.0	1831.0	30.0	95.52157291097761	sandstone	sedimentary	755	21965	6012	Kilian	780.2	811.0	True	1831.0
1894	28730	6135	10.1130/B30260.1	2728.5	137.6			2822.6	32.0	96.66619428895345	sandstone	sedimentary	290	7500	1979	Snowshoe Fm	165.45	176.25	True	2822.6	Mesozoic
1895	29158	XOM-MDB-47	10.1130/G35513.1	1140.8	21.4	1137.2	48.0	1130.3	133.8	100.9289569140936	sandstone	sedimentary	165	5752	1344	Wilcox Gp	41.3	56.0	True	1140.8	Cenozoic
1896	32525	102-97-481	10.1016/j.precamres.2013.09.012					2795.6	8.3		sandstone	sedimentary	776	22250	6173	Island Lake Gp unnamed 1	2710.0	2740.0	True	2795.6
1897	32525	102-97-481	10.1016/j.precamres.2013.09.012					2795.6	8.3		sandstone	sedimentary	776	22249	6173	Island Lake Gp unnamed 2	2680.0	2710.0	True	2795.6
1898	29202	51206	10.1130/B30999.1	97.4	6.3	93.6	27.0				sandstone	sedimentary	507	15707	4162	Frontier Fm	95.55	109.875	True	97.4
1899	28833	07-YHL-44	10.1130/B30530.1	1442.0	47.0	1449.0	47.0	1445.0	19.0	99.7923875432526	sandstone	sedimentary	1653	38100	9839	Saline River Fm	501.0	503.5	True	1445.0	Cambrian
1900	34912	38-FC05-1	10.1130/GES00982.1	34.1	3.2	55.4	17.2				sandstone	sedimentary	222	6547	1598	Imperial Fm	3.347	4.0333	False	34.1
1901	29009	09ANJ34	10.1130/B30818.1	145.0	2.0	137.0	22.0				sandstone	sedimentary	413	11096	2971	Valdez Gp	67.525	83.6	True	145.0
1902	45383	06GC154	10.1016/j.precamres.2017.03.006	1440.1	37.4	1450.7	40.0	1466.2	81.4	98.21988814622834	shale	sedimentary	491	36863	3996	Hotauta Conglomerate	1250.0	1254.0	True	1440.1
1903	45383	06GC154	10.1016/j.precamres.2017.03.006	1440.1	37.4	1450.7	40.0	1466.2	81.4	98.21988814622834	shale	sedimentary	491	36862	3996	Bass Limestone	1244.0	1250.0	True	1440.1
1904	45383	06GC154	10.1016/j.precamres.2017.03.006	1440.1	37.4	1450.7	40.0	1466.2	81.4	98.21988814622834	shale	sedimentary	491	36861	3996	Hakatai Shale	1180.0	1244.0	True	1440.1
1905	45383	06GC154	10.1016/j.precamres.2017.03.006	1440.1	37.4	1450.7	40.0	1466.2	81.4	98.21988814622834	shale	sedimentary	491	36860	3996	Shinumo Quartzite	1140.0	1180.0	True	1440.1
1906	45383	06GC154	10.1016/j.precamres.2017.03.006	1440.1	37.4	1450.7	40.0	1466.2	81.4	98.21988814622834	shale	sedimentary	491	36859	3996	Dox Sandstone	1108.0	1140.0	True	1440.1
1907	45383	06GC154	10.1016/j.precamres.2017.03.006	1440.1	37.4	1450.7	40.0	1466.2	81.4	98.21988814622834	shale	sedimentary	491	36858	3996	Cardenas lavas	1100.0	1108.0	True	1440.1
1908	37758	7-30a	https://uh-ir.tdl.org/uh-ir/handle/10657/964	102.8	2.8	104.1	2.6	134.0	47.4	76.71641791044776	sandstone	sedimentary	1633	37499	9607	Dunvegan Fm	95.0	96.1	True	102.8
1909	28707	Tapeats2	10.1130/L121.1	1694.0	54.0	1705.0	40.0	1718.0	56.0	98.60302677532015	sandstone	sedimentary	491	15029	3997	Tapeats Sandstone	506.75	508.775	True	1694.0	Cambrian
1910	43168	BENYON-316	10.2110/jsr.2014.16	1412.6	28.6	1424.6	17.8	1442.4	11.8	97.93399889073766	sandstone	sedimentary	1625	37218	9542	McMurray Fm	111.75	125.0	True	1442.4	Mesozoic
1911	37463	SK	10.1130/GES01313.1	68.4	5.3	65.4	8.1				sandstone	sedimentary	520	16418	4285	Simsboro Sand Mbr	56.0	56.8	True	68.4
1912	28691	06GC155	10.1130/L121.1	1482.0	38.0	1538.0	30.0	1616.0	48.0	91.70792079207921	sandstone	sedimentary	491	15037	4000	Supai Fm	282.0	313.75	False	1482.0
1913	33997	05W170	10.1130/L451.1	207.0	4.6	202.9	9.8	154.8	112.0	133.72093023255815	sandstone	sedimentary	1454	33648	8231	Lewes River	213.125	228.6667	True	207.0
1914	33997	05W170	10.1130/L451.1	207.0	4.6	202.9	9.8	154.8	112.0	133.72093023255815	sandstone	sedimentary	1454	33647	8231	Lewes River	228.6667	238.25	True	207.0
1915	35317	GVG18	10.1130/G33746.1	1646.1	103.4	1694.1	58.6	1754.0	6.6	93.84834663625998	sandstone	sedimentary	251	6864	1743	Lower Markley Sandstone Mbr	40.425	42.925	True	1754.0	Cenozoic
1916	35317	GVG18	10.1130/G33746.1	1646.1	103.4	1694.1	58.6	1754.0	6.6	93.84834663625998	sandstone	sedimentary	251	6862	1743	Upper Markley Sandstone Mbr	37.8	38.675	True	1754.0	Cenozoic
1917	29181	XOM-MDB-71	10.1130/G35513.1	214.4	6.0	209.5	19.4	154.5	231.6	138.77022653721684	sandstone	sedimentary	521	16441	4287	Wilcox Gp	49.85	58.4	True	214.4
1918	37801	EAH-39	http://cedar.wwu.edu/wwuet/356/	1483.0	74.3	1555.8	45.5	1656.0	20.5	89.55314009661836	metasedimentary	metamorphic	1446	33546	8154	Yellow Aster Complex Fm	458.4	508.5	True	1656.0	Cambrian
1919	35708	4CD13	10.1016/j.precamres.2014.06.005	1035.5	15.0	1028.8	31.6	1014.7	93.8	102.04986695575047	sandstone	sedimentary	464	13894	3692	Noonday Dolomite	569.2	578.6	True	1035.5
1920	40697	RB12-08	10.2475/06.2015.02	61.4	2.4	63.5	7.2	144.4	260.0	42.5207756232687	sandstone	sedimentary	413	11097	2972	Orca Gp	53.95	64.9	True	61.4
1921	35706	2CD11	10.1016/j.precamres.2014.06.005	1835.4	30.2	1848.4	16.4	1863.1	15.0	98.5132306371102	arkose	sedimentary	464	13894	3692	Noonday Dolomite	569.2	578.6	True	1863.1
1922	28720	GRF	10.1130/G31762.1	2711.0	51.1	2758.2	26.9	2793.0	26.8	97.0640887934121	sandstone	sedimentary	334	9163	2316	Kootenai Fm	113.0	115.0	True	2793.0	Mesozoic
1923	29941	CG11-7	10.1130/GES00917.1	1137.0	60.0	1146.0	48.0	1184.6	92.0	95.981765996961	sandstone	sedimentary	523	16618	4300	Sparta Fm	40.1333	40.7167	True	1137.0	Cenozoic
1924	35249	HHP7272	10.1130/B30848.1	1267.3	56.2	1385.2	42.4	1571.7	51.4	80.63243621556276	sandstone	sedimentary	1657	38184	9876	Slats Creek Fm	503.5	511.0	False	1571.7
1925	34565	767-1	10.1130/B26399.1	152.1	4.4						greywacke	sedimentary	243	6852	1738	Franciscan Subduction Complex	59.2	153.4	True	152.1
1926	29046	CCR0110	10.1130/B30824.1	1582.0	44.6	1594.3	26.8	1610.5	18.8	98.23036324122943	sandstone	sedimentary	515	15994	4229	Sundance Fm	158.354	168.8	True	1610.5	Mesozoic
1927	43164	BENYON-269	10.2110/jsr.2014.16	1344.0	17.6	1329.6	21.0	1306.6	47.0	102.86239093831318	sandstone	sedimentary	1625	37218	9542	McMurray Fm	111.75	125.0	True	1344.0	Mesozoic
1928	30299	CLS06-2	10.1130/B31065.1	111.7	20.6	184.1	103.4				sandstone	sedimentary	215	6524	1589	Lusardi Fm	80.725	92.875	True	111.7
1929	45602	Carb-Canyon	https://doi.org/10.1130/B31532.1	1427.0	52.0	1424.0	44.0	1421.0	67.6	100.42223786066151	sandstone	sedimentary	491	36854	9433	Carbon Canyon Member	748.0	753.6	True	1427.0
1930	29108	XOM-AOS-12	10.1130/G35513.1	171.9	7.0	172.3	36.2	177.0	523.8	97.11864406779661	sandstone	sedimentary	1625	37221	9542	Grand Rapids Fm	108.0	109.25	True	171.9
1931	35255	19AY11	10.1130/B30860.1	2461.5	27.6	2464.6	13.6	2467.2	10.0	99.76896887159533	slate	metamorphic	477	14498	3843	Perry Canyon Fm	663.3331	668.0557	True	2467.2
1932	29175	XOM-MDB-65	10.1130/G35513.1	2524.0	270.6	2552.0	122.0	2574.3	27.2	98.04607077652177	sandstone	sedimentary	519	16319	4277	Wilcox Fm	49.85	53.95	True	2574.3	Cenozoic
1933	28972	Basal-Monteith	10.1130/B30671.1	2867.3	117.2	2857.8	58.0	2851.1	54.8	100.56820174669426	sandstone	sedimentary	1622	37079	9506	Monteith Fm	139.8	146.775	True	2851.1	Mesozoic
1934	42909	FCB-D3	http://ir.uiowa.edu/etd/3119	1046.0	25.4	1065.0	24.8	1105.0	53.8	94.6606334841629	sandstone	sedimentary	80	2986	581	Cherokee Gp	310.5	317.25	True	1046.0	Paleozoic*
1935	45598	CDGC6	https://doi.org/10.1130/B31532.1	1145.0	32.0	1132.0	74.0	1106.0	96.2	103.5262206148282	sandstone	sedimentary	491	36857	9434	Nankoweap Fm	767.6	770.4	True	1145.0
1936	45599	LC-Canyon	https://doi.org/10.1130/B31532.1	1868.0	72.0	1887.0	50.0	1907.0	35.0	97.95490298898794	sandstone	sedimentary	491	36854	9433	Carbon Canyon Member	748.0	753.6	True	1907.0
1937	40657	CW2	10.1306/10191515029	422.6	20.8	417.6	19.0	390.4	48.2	108.24795081967213	sandstone	sedimentary	1625	37218	9542	McMurray Fm	111.75	125.0	True	422.6
1938	40690	11CD-60	10.2475/06.2015.02	153.9	7.6	149.0	31.4	72.8	526.0	211.4010989010989	sandstone	sedimentary	414	11107	2980	Ghost Rocks Fm	62.7	66.0	True	153.9
1939	29060	FU0108	10.1130/B30824.1	1930.0	20.4	1932.3	23.0	1934.8	42.2	99.75191234236097	sandstone	sedimentary	515	16018	4233	Flathead Sandstone	503.5	511.0	True	1930.0	Cambrian
1940	35708	4CD13	10.1016/j.precamres.2014.06.005	1715.6	88.2	1718.0	51.4	1720.8	37.2	99.69781496978149	sandstone	sedimentary	464	13894	3692	Noonday Dolomite	569.2	578.6	True	1720.8
1941	40663	LA1	10.1306/10191515029	2737.3	60.8	2704.6	27.0	2680.3	14.0	102.12662761631161	sandstone	sedimentary	1625	37218	9542	McMurray Fm	111.75	125.0	True	2680.3	Mesozoic
1942	29201	51205	10.1130/B30999.1	1685.4	26.6	1678.0	17.1	1668.8	19.4	100.9947267497603	sandstone	sedimentary	507	15705	4162	Adaville Fm	90.825	92.875	True	1668.8	Mesozoic
1943	28744	09ANJ40	10.1130/L131.1	1907.0	54.0	1901.2	30.6	1894.9	24.6	100.63855612433375	sandstone	sedimentary	413	11096	2971	Valdez Gp	67.525	83.6	True	1894.9	Mesozoic
1944	37468	OK-1	10.1130/GES01316.1	1383.8	24.8	1428.0	55.7	1494.5	132.3	92.59284041485446	sandstone	sedimentary	158	5568	1306	Pontotoc Gp	282.0	300.1	True	1383.8	Paleozoic*
1945	34003	GL04-108B	10.1130/L451.1	187.4	4.2	202.0	20.0	375.0	232.0	49.973333333333336	conglomerate	sedimentary	1454	33651	8228	Laberge	169.8	199.8	True	187.4
1946	35301	GV64	http://gsabulletin.gsapubs.org/content/114/12/1564.short	165.3	5.1						sandstone	sedimentary	259	6966	1765	Stony Creek Fm	141.5333	152.1	True	165.3
1947	35285	Samp13	http://gsabulletin.gsapubs.org/content/113/10/1343.short	1141.0	10.0	1140.0	18.0	1138.0	26.0	100.26362038664323	sandstone	sedimentary	230	6617	1632	Wood Canyon Fm	516.1	598.375	True	1141.0	Cambrian
1948	45597	CDGC5	https://doi.org/10.1130/B31532.1	1103.0	58.0	1130.0	48.0	1183.0	75.4	93.23753169907016	sandstone	sedimentary	491	36857	9434	Nankoweap Fm	767.6	770.4	True	1103.0
1949	29041	BHB001	10.1130/B30824.1	97.2	4.8	97.0	8.6	92.4	185.6	105.19480519480518	sandstone	sedimentary	515	15990	4229	Frontier Fm	95.022	100.5	True	97.2
1950	43650	VP09-08	10.1144/jgs2014-027	694.0	13.0	700.0	13.0	739.0	29.0	93.9106901217862	sandstone	sedimentary	1562	35765	9021	Danish River Fm	427.4	438.5	True	694.0	Paleozoic*
1951	29178	XOM-MDB-68	10.1130/G35513.1	1755.5	40.0	1745.6	21.8	1733.8	3.8	101.25158611143154	sand	sedimentary	159	5588	1310	Strawn Gp	306.0	312.0	True	1733.8	Paleozoic*
1952	28676	05SP14-20	10.1130/B30029.1	1976.5	58.5	1995.3	35.9	2014.8	40.1	98.09906690490371	conglomerate	sedimentary	465	13948	3704	Sheep Pass Fm	34.875	46.175	True	2014.8	Cenozoic
1953	28833	07-YHL-44	10.1130/B30530.1	1450.0	48.0	1465.0	49.0	1475.0	19.0	98.30508474576271	sandstone	sedimentary	1653	38100	9839	Saline River Fm	501.0	503.5	True	1475.0	Cambrian
1954	29060	FU0108	10.1130/B30824.1	2801.7	17.8	2810.1	20.8	2816.1	33.4	99.48865452221158	sandstone	sedimentary	515	16018	4233	Flathead Sandstone	503.5	511.0	True	2801.7	Cambrian
1955	29181	XOM-MDB-71	10.1130/G35513.1	549.0	38.6	567.3	42.8	641.1	142.0	85.634066448292	sandstone	sedimentary	521	16441	4287	Wilcox Gp	49.85	58.4	True	549.0	Cenozoic
1956	37468	OK-1	10.1130/GES01316.1	1305.4	8.1	1300.6	6.3	1292.5	9.9	100.99806576402321	sandstone	sedimentary	158	5568	1306	Pontotoc Gp	282.0	300.1	True	1305.4	Paleozoic*
1957	35341	08LT02	10.1080/00206814.2013.844313	129.6	2.2	134.5	33.4				sandstone	sedimentary	1421	33271	7753	Las Trancas Fm	150.325	156.0	True	129.6
1958	29210	51214	10.1130/B30999.1	945.7	11.2	954.6	15.1	975.2	42.5	96.97497949138638	sandstone	sedimentary	509	15780	4175	Morrison Fm	145.0	158.85	True	945.7	Mesozoic
1959	28712	Upper_Hermit	10.1130/L121.1	1478.0	52.0	1471.0	32.0	1460.0	18.0	101.23287671232877	sandstone	sedimentary	491	15036	4000	Hermit Shale	279.7375	282.0	True	1460.0	Paleozoic*
1960	29321	12WI2	10.1130/B31142.1	1687.7	54.8	1702.0	31.8	1719.7	21.2	98.13921032738268	quartzite	metamorphic	459	13629	3603	Harkless Fm	516.1	526.15	True	1719.7	Cambrian
1961	34923	49-TBP79122	10.1130/GES00982.1	338.9	11.4	350.0	36.6				sandstone	sedimentary	485	14891	3960	Browns Park Fm	3.347	13.27	True	338.9
1962	42907	FCB-D1	http://ir.uiowa.edu/etd/3119	605.0	19.0	607.0	21.4	614.0	71.6	98.53420195439739	sandstone	sedimentary	90	3423	691	Cherokee Gp	311.0	319.0	True	605.0	Paleozoic*
1963	28735	7015	10.1130/B30260.1	201.0	8.2			158.1	71.6	127.13472485768501	sandstone	sedimentary	290	7498	1979	Lonesome Fm	163.5	164.15	True	201.0
1964	43648	n4476	10.1144/jgs2014-027	1450.0	26.0	1451.0	16.0	1453.0	12.0	99.79353062629043	sandstone	sedimentary	1562	35765	9021	Danish River Fm	427.4	438.5	True	1453.0	Paleozoic*
1965	29172	XOM-MDB-62	10.1130/G35513.1	48.5	4.6	71.3	34.4	923.3	1026.0	5.252897216506011	sandstone	sedimentary	518	16247	4268	Frio Fm	24.2975	28.1	True	48.5
1966	29174	XOM-MDB-64	10.1130/G35513.1	73.8	5.0	68.1	40.6				sandstone	sedimentary	519	16319	4277	Wilcox Fm	49.85	53.95	True	73.8
1967	42910	FCB-D4	http://ir.uiowa.edu/etd/3119	615.0	15.6	626.0	23.0	665.0	88.4	92.4812030075188	sandstone	sedimentary	89	3399	688	Cherokee Gp	311.0	319.0	True	615.0	Paleozoic*
1968	29174	XOM-MDB-64	10.1130/G35513.1	1889.0	80.4	1875.6	42.4	1860.7	12.0	101.520932982211	sandstone	sedimentary	519	16319	4277	Wilcox Fm	49.85	53.95	True	1860.7	Cenozoic
1969	37755	07WZ020A	10.1139/E10-056	432.0	18.0	434.0	12.0	420.0	25.0	102.85714285714286	sandstone	sedimentary	1659	38240	9897	Imperial Fm	356.8666	382.7	True	432.0
1970	35697	Samp_03	10.1016/j.sedgeo.2005.07.014	993.0	33.6	1127.4	177.4	1396.5	80.6	71.1063372717508	sandstone	sedimentary	28	1038	139	Pocahontas Fm	322.5	323.6214	True	993.0	Paleozoic*
1971	34459	14PL03	10.1130/B25896.1	49.2	2.0						sandstone	sedimentary	295	7491	1975	Poison Creek Fm	11.62	12.17	True	49.2
1972	35713	K03DV04	10.1016/j.precamres.2014.06.005	1447.6	46.4	1436.0	67.4	1418.9	153.0	102.02269363591515	arkose	sedimentary	464	13875	3691	Crystal Spring Fm	686.0	703.0	True	1447.6
1973	28577	T3	10.1130/B30120.1	1778.6	28.4	1793.4	51.4	1879.2	57.0	94.64665815240528	sandstone	sedimentary	1657	38191	9877	Imperial Fm	362.225	382.7	True	1778.6	Paleozoic*
1974	43192	CP8	10.2110/jsr.2008.088	1424.6	28.6	1435.3	56.2	1451.0	132.0	98.18056512749828	sandstone	sedimentary	490	15005	3991	Moenkopi Fm	247.2	251.902	True	1424.6	Mesozoic
1975	28692	06GC156	10.1130/L121.1	1297.0	24.0	1311.0	26.0	1336.0	54.0	97.08083832335329	sandstone	sedimentary	491	15037	4000	Supai Fm	282.0	313.75	True	1297.0	Paleozoic*
1976	35701	11RMAH1	10.1016/j.precamres.2014.06.005	1172.9	15.2	1186.1	18.4	1210.3	43.6	96.909857060233	siltstone	sedimentary	464	13873	3691	Kingston Peak Fm	660.5	677.5	True	1172.9
1977	40690	11CD-60	10.2475/06.2015.02	1314.6	166.0	1477.5	109.0	1719.9	19.2	76.43467643467643	sandstone	sedimentary	414	11107	2980	Ghost Rocks Fm	62.7	66.0	True	1719.9	Mesozoic
1978	43652	C-054480	10.1144/jgs2014-027	653.0	12.0	651.0	14.0	634.0	34.0	102.9968454258675	sandstone	sedimentary	1566	35810	9042	Lands Lokk Fm	426.3	433.4	True	653.0	Paleozoic*
1979	37270	6PL13	10.1130/L557.1	2704.0	32.0	2691.0	16.0	2681.0	16.0	100.85788884744498	quartzite	metamorphic	324	8736	2206	Phi Kappa Fm	431.9	475.1334	True	2681.0	Paleozoic*
1980	28711	Toroweap2	10.1130/L121.1	1065.0	38.0	1073.0	40.0	1088.0	92.0	97.88602941176471	sandstone	sedimentary	491	15034	4000	Toroweap Fm	269.4875	275.2125	True	1065.0	Paleozoic*
1981	42912	IB-D1	http://ir.uiowa.edu/etd/3119	1086.0	33.6	1110.0	32.6	1157.0	68.8	93.86343993085566	sandstone	sedimentary	432	13132	3464	Bernadotte Sandstone Mbr	312.9333	313.8813	True	1086.0	Paleozoic*
1982	42908	FCB-D2	http://ir.uiowa.edu/etd/3119	1004.0	28.4	1008.0	29.4	1018.0	69.6	98.62475442043223	sandstone	sedimentary	90	3423	691	Cherokee Gp	311.0	319.0	True	1004.0	Paleozoic*
1983	35703	11RMSS5	10.1016/j.precamres.2014.06.005	1627.8	60.4	1622.4	43.6	1615.4	62.8	100.76761173703107	greywacke	sedimentary	464	13874	3691	Beck Spring Dolomite	677.5	686.0	True	1627.8
1984	29193	51102	10.1130/B30999.1	1008.3	43.6	1012.8	41.5	1022.6	90.8	98.60160375513398	sandstone	sedimentary	512	15908	8850	Lakota Fm	138.075	145.0	True	1008.3	Mesozoic
1985	34566	767-2	10.1130/B26399.1	122.1	4.4						greywacke	sedimentary	243	6852	1738	Franciscan Subduction Complex	59.2	153.4	True	122.1
1986	28717	CDM	10.1130/G31762.1	1845.9	38.5	1842.4	26.5	1838.4	36.2	100.4079634464752	conglomerate	sedimentary	1632	37456	9595	Cadomin Fm	122.0	125.0	True	1838.4	Mesozoic
1987	28746	BFB	10.1130/B30433.1	209.8	0.2	210.5	2.0	218.4	8.0	96.06227106227107	sandstone	sedimentary	490	15003	3990	Chinle Fm	201.3	232.0	True	209.8
1988	28682	07SR1	10.1130/B30029.1	1063.3	16.7	1073.8	23.6	1095.1	62.7	97.09615560222811	conglomerate	sedimentary	465	13941	3704	Needles Range Fm	26.072	26.579	True	1063.3	Cenozoic
1989	35309	KDS03	http://gsabulletin.gsapubs.org/content/114/12/1564.short	182.5	6.4						sandstone	sedimentary	260	6970	1767	Guinda Fm	84.05	84.5	True	182.5
1990	29120	XOM-MDB-05	10.1130/G35513.1	619.1	15.6	621.8	60.8	631.5	275.8	98.03642121931908	sandstone	sedimentary	526	16848	4323	Lower Frio Mbr	26.8325	27.4663	True	619.1	Cenozoic
1991	29120	XOM-MDB-05	10.1130/G35513.1	619.1	15.6	621.8	60.8	631.5	275.8	98.03642121931908	sandstone	sedimentary	526	16847	4323	Middle Frio Mbr	24.9313	26.8325	True	619.1	Cenozoic
1992	29120	XOM-MDB-05	10.1130/G35513.1	619.1	15.6	621.8	60.8	631.5	275.8	98.03642121931908	sandstone	sedimentary	526	16846	4323	Upper Frio Mbr	24.2975	24.9313	True	619.1	Cenozoic
1993	35259	23EAB10	10.1130/B30860.1	2593.4	111.2	2646.4	49.2	2687.1	7.6	96.51296937218562	siliciclastic	sedimentary	477	14498	3843	Perry Canyon Fm	663.3331	668.0557	True	2687.1
1994	35248	88PF5	10.1130/B30848.1	1894.9	52.6	1869.3	36.6	1840.9	51.4	102.93334781900158	conglomerate	sedimentary	1657	38183	9876	Illtyd Fm	511.0	518.5	True	1840.9	Cambrian
1995	37758	7-30a	https://uh-ir.tdl.org/uh-ir/handle/10657/964	114.5	3.3	116.1	3.2	148.0	61.0	77.36486486486487	sandstone	sedimentary	1633	37499	9607	Dunvegan Fm	95.0	96.1	True	114.5
1996	28749	GPU	10.1130/B30433.1	213.0	0.2	214.0	2.0	225.7	8.0	94.37306158617633	sandstone	sedimentary	490	15003	3990	Chinle Fm	201.3	232.0	True	213.0
1997	40660	KE2	10.1306/10191515029	1169.3	70.6	1168.2	55.2	1166.0	87.6	100.28301886792453	sandstone	sedimentary	1625	37218	9542	McMurray Fm	111.75	125.0	True	1169.3	Mesozoic
1998	28676	05SP14-20	10.1130/B30029.1	1687.5	39.8	1687.9	24.2	1688.4	22.2	99.94669509594883	conglomerate	sedimentary	465	13948	3704	Sheep Pass Fm	34.875	46.175	True	1688.4	Cenozoic
[truncated: 73,291 more rows]
